# Supplementary material for: Biochemical Changes in Two Barley Genotypes Inoculated With a Beneficial Fungus Trichoderma harzianum Rifai T-22 Grown in Saline Soil
Source: Front Plant Sci. 2022 Aug 2;13:908853. doi: 10.3389/fpls.2022.908853 (PMC9379338; doi:10.3389/fpls.2022.908853)
Supplement: Supplementary file 2 [file Table_1.XLSX]

## Sheet: Table S1
Supplementary Table S1. Identified metabolites from roots of two barley genotypes (cv. Vlamingh and cv. Gairdner) using gas chromatography- mass spectrometry. X-fold changes for treatment groups CF and S are compared against treatment C in both genotypes. X-fold chnages for treatment SF is compared against treatment S in both genotypes. The identified metabolites are categorised in five categorie…
		Gairdner																					Vlamingh
		GC				GCF					GS					GSF							VC				VCF					VS					VSF
			x-fold		sem	x-fold		sem	p value without correction	BH corrected p values	x-fold		sem	p value without correction	BH corrected p values	x-fold		sem	p value without correction	BH corrected p values				x-fold		sem	x-fold		sem	p value without correction	BH corrected p values	x-fold		sem	p value without correction	BH corrected p values	x-fold		sem	p value without correction	BH corrected p values
Amines and Amino Acids
AA	3-cyano-L- alanine		1	±	0.0132915	2.55871	±	0.129295	0.000234215	0.00514198	6.64964	±	0.246882	0.679361	3.98953e-06	0.139515	±	0.336517	0.621314	3.92874e-05				1	±	0.0614798	0.830066	±	0.0666066	7.04317e-07	0.300928	0.33011	±	0.342932	0.710699	0.000329403	2.69701	±	0.239724	0.000392153	0.00018036
AA	beta-alanine		1	±	0.190353	0.641147	±	0.281298	0.0574374	0.136738	1.9578	±	0.160353	0.00251992	0.00027163	0.245791	±	0.395114	0.00299447	0.0103606				1	±	0.19219	0.417379	±	0.24324	0.369029	0.244049	1.72614	±	0.346868	0.299772	0.146132	1.27869	±	0.111779	0.0108181	0.0504816
AA	Alanine		1	±	0.00449254	30.2184	±	0.475984	0.413953	0.0574374	1.75389	±	0.119905	0.153668	0.00251992	3.74607	±	0.417601	0.0944188	0.00299447				1	±	0.43172	15.4088	±	0.289788	0.010743	0.369029	0.484973	±	0.168623	0.876275	0.299772	3.93327	±	0.0312598	0.921168	0.0108181
AA	Asparagine		1	±	0.0431616	2.46314	±	0.149131	0.164068	0.0345271	15.2098	±	0.0809925	0.0462306	4.59906e-07	0.0528534	±	0.0746509	0.110577	2.27221e-05				1	±	0.25482	1.11423	±	0.107324	0.768162	0.453525	0.35228	±	0.0928578	0.0877898	0.00491236	8.87629	±	0.0209218	0.113019	0.000296338
AA	Ethanolamine		1	±	0.665211	2.86094	±	0.302403	0.0837319	0.00757795	2.52954	±	0.187378	0.410272	9.31662e-05	0.513281	±	0.414073	0.0056085	0.00128303				1	±	0.115689	1.30002	±	0.0690426	0.31778	0.258988	0.356762	±	0.30911	0.0535823	0.00240679	2.07678	±	0.0131663	0.051433	0.000425758
AA	Glutamine		1	±	0.00111686	1.85959	±	0.569008	0.167551	0.395168	5.74493	±	0.102858	0.194048	0.00301179	0.0344403	±	0.424752	0.0620155	0.000146413				1	±	0.852695	1.39853	±	0.408935	0.189974	0.0545978	0.410235	±	0.0993883	0.329526	0.00487367	8.82061	±	0.00661077	0.126315	0.000348242
AA	Hydroxylamine		1	±	0.0352155	1.06112	±	0.142825	0.000787756	0.413953	0.779081	±	0.17654	0.940882	0.153668	4.49701	±	0.189384	0.397708	0.0944188				1	±	0.233895	3.9077	±	0.100716	0.157277	0.010743	0.847538	±	0.226872	0.0999821	0.876275	0.956818	±	0.0957422	9.13006e-05	0.921168
AA	L-Glutamine		1	±	0.29643	1.77891	±	0.290221	0.022017	0.00454098	2.79102	±	0.25524	0.496013	0.000246663	0.212874	±	0.334354	0.0300898	3.62028e-05				1	±	0.218625	0.879229	±	0.223468	0.742545	0.390763	0.231424	±	0.24818	0.245653	0.000178844	3.15712	±	0.0738845	0.155714	0.000674077
AA	Methionine		1	±	0.0240388	3.20553	±	0.276668	0.00757795	0.0245793	2.15668	±	0.0923678	9.31662e-05	4.68055e-05	1.20585	±	0.110079	0.00128303	0.755598				1	±	0.202708	1.35789	±	0.144455	0.258988	0.222658	0.365721	±	0.138765	0.00240679	0.0991152	2.13359	±	0.0625305	0.000425758	0.000881069
AA	Ornithine		1	±	0.0193947	5.03375	±	0.109362	0.0252764	0.0121368	3.75527	±	0.148725	0.734837	5.92289e-06	0.725702	±	0.0731992	0.0569538	0.156146				1	±	0.246202	2.89009	±	0.178157	0.0175445	0.029981	0.190107	±	0.308085	0.156771	0.00452294	4.57807	±	0.0346746	0.338544	0.000520506
AA	Phenylalanine		1	±	0.0627508	0.897376	±	0.15242	0.410559	0.548073	1.51028	±	0.117029	0.102105	0.00909934	0.38231	±	0.415204	0.557627	0.000685449				1	±	0.105362	1.41158	±	0.123508	0.95771	0.0399487	0.796904	±	0.147448	0.00863756	0.2975	3.31238	±	0.180074	7.3919e-05	6.96779e-06
AA	Serine		1	±	0.0471774	1.85634	±	0.0579288	0.184747	0.121996	2.135	±	0.0629376	9.2089e-07	0.000642743	1.15198	±	0.0982181	4.26038e-06	0.555068				1	±	0.101114	2.29026	±	0.0694119	0.00212818	0.0232153	0.597979	±	0.122252	0.86316	0.0782593	4.27169	±	0.0716957	6.07385e-06	1.30893e-05
AA	Threonine		1	±	0.135195	0.884859	±	0.144932	0.252239	0.40405	1.70973	±	0.151712	1.01972e-05	0.000512347	0.3938	±	0.375923	0.0492201	0.000113754				1	±	0.102766	2.02865	±	0.0849908	0.000318976	0.00124039	1.11405	±	0.12193	9.76049e-07	0.570249	2.97794	±	0.0843347	0.000123126	1.18989e-05
AA	Tyramine		1	±	1.37538	6.19002	±	0.308368	0.132442	0.0273014	2.41119	±	0.131057	0.223891	3.54055e-05	1.11832	±	0.344047	0.0158241	0.59497				1	±	0.188497	8.26481	±	0.48572	0.0484856	0.00370858	0.415671	±	0.141621	0.356506	0.0101889	4.22402	±	0.0120662	0.773029	8.00653e-12
AA	Tyrosine		1	±	0.0376515	1.08035	±	0.202772	0.289389	0.521852	1.51588	±	0.0581763	0.000159238	0.155001	0.340948	±	0.258137	0.00934435	0.00494864				1	±	0.152256	1.57681	±	0.137938	0.965608	0.00744071	0.451856	±	0.169969	0.773107	0.00805793	8.27598	±	0.0194698	0.00116645	1.47413e-05
AA	Valine		1	±	0.430579	9.06521	±	0.311736	0.0877709	0.167551	1.20296	±	0.0742045	0.0350994	0.194048	13.6244	±	0.428865	0.0224249	0.0620155				1	±	0.194327	1.38828	±	0.506617	0.271818	0.189974	0.147189	±	0.0792484	0.306115	0.329526	0.840822	±	0.0410091	0.000164024	0.126315
AA	Proline		1	±	0.134831	0.748304	±	0.245751	0.361883	0.252239	6.64321	±	0.0656051	6.77449e-06	1.01972e-05	0.492559	±	0.330872	0.0063696	0.0492201				1	±	0.174461	2.31971	±	0.207019	0.120379	0.000318976	6.15031	±	0.0996508	0.924125	9.76049e-07	2.43057	±	0.0303972	6.95945e-05	0.000123126
AA	Isoleucine		1	±	0.0207374	1.13423	±	0.284888	0.121996	0.184747	2.63743	±	0.0785123	0.000642743	9.2089e-07	0.328156	±	0.415498	0.555068	4.26038e-06				1	±	0.242754	1.7087	±	0.203159	0.0232153	0.00212818	0.979153	±	0.164928	0.0782593	0.86316	3.26573	±	0.110757	1.30893e-05	6.07385e-06
Organic Acids
OA	2,4,5-Trihydroxypentanoic acid		1	±	0.0664774	0.801662	±	0.104373	0.40405	0.190362	1.44304	±	0.0568338	0.000512347	0.000252065	0.530215	±	0.126761	0.000113754	0.0512357				1	±	0.130346	0.400354	±	0.0611009	0.00124039	0.248497	1.79661	±	0.132493	0.570249	0.166582	2.58739	±	0.0561225	1.18989e-05	0.000624326
OA	2-Keto-L-gluconic acid		1	±	0.200642	0.823654	±	0.281381	0.0760255	0.230414	1.54992	±	0.158828	0.495891	0.00287876	0.487243	±	0.370377	0.0368759	0.00180653				1	±	0.180016	2.63548	±	0.210097	0.529811	0.00180997	1.85781	±	0.22283	0.110293	0.0352212	2.27705	±	0.0520491	0.00496096	9.92115e-05
OA	2-oxo-Glutaric acid		1	±	1.47155	0.664553	±	0.317475	0.136738	0.156967	1.73728	±	0.0891825	0.00027163	0.00999113	0.262701	±	0.419141	0.0103606	0.0147115				1	±	0.199	0.718077	±	0.363941	0.244049	0.671059	0.544335	±	0.1056	0.146132	0.362414	4.5508	±	0.0199443	0.0504816	0.000427858
OA	Aconitic acid		1	±	0.510783	1.06301	±	0.354425	0.0529977	0.347406	2.30858	±	0.159797	0.408125	0.00305449	0.1787	±	0.400857	0.0528526	0.0100307				1	±	0.183119	0.374377	±	0.574638	0.0570925	0.217475	0.550777	±	0.377878	0.745346	0.711363	4.59551	±	0.0914697	0.298417	0.000117029
OA	Aspartic acid		1	±	0.379623	3.20553	±	0.336057	0.0549242	0.0245793	2.15668	±	0.170353	0.567941	4.68055e-05	1.20585	±	0.388496	0.0165909	0.755598				1	±	0.190582	1.35788	±	0.33693	0.746332	0.222667	0.365721	±	0.446951	0.760246	0.0991151	2.13357	±	0.0582059	0.00120645	0.000881124
OA	Azalaic acid		1	±	0.112228	0.696793	±	0.11426	0.00454098	0.149377	1.23627	±	0.128036	0.000246663	0.00637867	0.331435	±	0.148558	3.62028e-05	0.015114				1	±	0.087594	1.30801	±	0.13378	0.390763	0.388391	1.27872	±	0.365989	0.000178844	0.415413	4.73166	±	0.0645563	0.000674077	4.23026e-05
OA	4-amino-butyric acid		1	±	0.0174797	0.735094	±	0.323193	0.0135817	3.46791e-07	2.19083	±	0.0672269	2.12245e-07	0.000369989	0.457303	±	0.229274	0.0242389	0.00370291				1	±	0.387341	3.2134	±	0.25073	0.0156608	0.00135482	0.935636	±	0.583336	0.00301838	0.470655	3.73157	±	0.0499652	0.000993723	2.9482e-06
OA	Cinnamic acid		1	±	0.528848	0.612662	±	0.299089	0.612262	0.111816	1.10341	±	0.0631762	1.72517e-07	0.612868	0.52218	±	0.376493	0.00128016	0.0547025				1	±	0.163848	0.261047	±	0.215082	0.557562	0.00871984	0.704625	±	0.575763	0.024883	0.418151	1.03859	±	0.0494469	0.00103979	0.47702
OA	Citric acid		1	±	1.51927	5.03372	±	0.310167	0.23029	0.012137	3.75556	±	0.178462	0.478185	5.9195e-06	0.725638	±	0.341393	0.0325069	0.156079				1	±	0.192532	2.88982	±	0.505625	0.080595	0.029986	0.190105	±	0.178173	0.10964	0.00452288	4.5781	±	0.0199209	0.445053	0.000520493
OA	Erythronic acid		1	±	0.422893	1.20861	±	0.224368	0.00301359	0.825732	0.469714	±	0.181682	2.31459e-06	0.0613807	1.63868	±	0.347852	0.000166066	0.98812				1	±	0.0612366	0.854868	±	0.0428462	0.000450371	0.860118	0.901136	±	0.556082	0.00104465	0.817289	0.738034	±	0.0485226	0.000128198	0.853756
OA	Ferulic acid		1	±	0.0142531	0.526491	±	0.34652	0.0245793	0.0759899	0.793599	±	0.0486715	4.68055e-05	0.0317103	0.514917	±	0.337405	0.755598	0.0510011				1	±	0.519568	0.259782	±	0.231218	0.222667	0.0361758	0.63836	±	0.189406	0.0991151	0.584011	1.4942	±	0.0137406	0.000881124	0.0467806
OA	Fumaric acid		1	±	0.0142531	1.36772	±	0.34652	0.0245793	0.361883	2.95316	±	0.0486715	4.68055e-05	6.77449e-06	0.161764	±	0.337405	0.755598	0.0063696				1	±	0.519568	0.737969	±	0.231216	0.222658	0.120379	0.501885	±	0.189406	0.0991152	0.924125	4.99856	±	0.0137413	0.000881069	6.95945e-05
OA	Gluconic acid		1	±	0.00180369	1.24406	±	0.552913	0.104783	0.536585	1.78154	±	0.0594515	2.90605e-07	0.375651	0.397184	±	0.418443	0.558214	0.0903803				1	±	0.895109	0.371996	±	0.427609	0.223383	0.300778	6.4763	±	0.293962	0.0254825	0.0292248	0.780516	±	0.0307013	0.00121966	0.81058
OA	Glutamic acid		1	±	0.00520055	1.69463	±	0.0207962	3.46791e-07	0.171623	1.70003	±	0.15545	0.000369989	0.00402241	1.32383	±	0.152637	0.00370291	0.917859				1	±	0.055751	2.30569	±	0.192234	0.00135482	0.0262632	0.475967	±	0.113503	0.470655	0.0704448	2.56455	±	0.0901433	2.9482e-06	6.85682e-05
OA	Glyceric acid		1	±	0.0213995	0.530261	±	0.334894	0.825732	0.0877709	1.23289	±	0.365467	0.0613807	0.0350994	0.360126	±	0.4699	0.98812	0.0224249				1	±	0.394538	0.470568	±	0.114762	0.860118	0.271818	1.27924	±	0.245321	0.817289	0.306115	1.64923	±	0.0985304	0.853756	0.000164024
OA	Lactic acid		1	±	0.640544	0.399637	±	0.361047	0.235086	0.000234215	1.0602	±	0.039722	3.36745e-06	0.679361	0.883039	±	0.423975	0.0289944	0.621314				1	±	0.180958	2.86074	±	0.33536	0.170191	7.04317e-07	1.49292	±	0.0581965	0.947927	0.710699	7.52397	±	0.0263707	1.05832e-07	0.000392153
OA	Malic acid		1	±	1.84308	3.01039	±	0.302616	0.156967	0.0135817	3.83425	±	0.110673	0.00999113	2.12245e-07	0.586456	±	0.479904	0.0147115	0.0242389				1	±	0.191061	3.02127	±	0.321993	0.671059	0.0156608	0.196198	±	0.334653	0.362414	0.00301838	4.28829	±	0.0593892	0.000427858	0.000993723
OA	Nicotinic acid		1	±	0.38982	0.504918	±	0.289645	0.112008	0.132442	1.24706	±	0.109227	0.813137	0.223891	0.325021	±	0.379181	0.0410535	0.0158241				1	±	0.161501	0.275674	±	0.423103	0.00290495	0.0484856	1.23604	±	0.139013	0.80785	0.356506	0.995309	±	0.108288	0.000465916	0.773029
OA	Phosphoric acid		1	±	0.0152621	0.705565	±	0.267057	0.171623	0.0252764	1.10588	±	0.0888065	0.00402241	0.734837	0.663239	±	0.314803	0.917859	0.0569538				1	±	0.368835	2.12368	±	0.213665	0.0262632	0.0175445	0.666279	±	0.162466	0.0704448	0.156771	1.08294	±	0.0281607	6.85682e-05	0.338544
OA	Phosphoric acid monomethyl ester		1	±	0.144115	0.510631	±	0.152317	0.548073	0.0837319	1.33129	±	0.0492583	0.00909934	0.410272	0.181262	±	0.162905	0.000685449	0.0056085				1	±	0.114552	1.14961	±	0.0501368	0.0399487	0.31778	0.567025	±	0.158676	0.2975	0.0535823	1.56293	±	0.0574387	6.96779e-06	0.051433
OA	Pyroglutamic acid		1	±	0.194815	7.87214	±	0.352338	0.190362	0.104783	2.90132	±	0.0615437	0.000252065	2.90605e-07	3.30644	±	0.470226	0.0512357	0.558214				1	±	0.20035	1.12454	±	0.402357	0.248497	0.223383	0.037893	±	0.167034	0.166582	0.0254825	3.01678	±	0.0974808	0.000624326	0.00121966
OA	Quinic acid		1	±	0.528443	1.37773	±	0.299608	0.200581	0.0373523	2.23599	±	0.151571	0.000254123	0.000346226	0.526564	±	0.384716	0.00205895	0.000537187				1	±	0.176666	1.76366	±	0.206763	0.794522	0.000501387	0.55849	±	0.426789	0.178278	0.0190524	3.98373	±	0.1219	0.000564455	4.79079e-05
OA	Ribonic acid		1	±	0.504178	0.673813	±	0.247736	0.0345271	0.143642	1.17745	±	0.216809	4.59906e-07	0.137918	0.338599	±	0.342809	2.27221e-05	0.01589				1	±	0.172849	0.78154	±	0.10382	0.453525	0.75626	1.19487	±	0.84162	0.00491236	0.331294	2.42951	±	0.0911593	0.000296338	1.2207e-08
OA	Succinic acid		1	±	0.162154	0.858422	±	0.307249	0.353568	0.289389	1.42911	±	0.312156	0.445534	0.000159238	0.462859	±	0.382432	0.116501	0.00934435				1	±	0.139152	0.924401	±	0.0955541	0.112985	0.965608	0.876751	±	0.0857303	0.220718	0.773107	1.97747	±	0.0445243	0.000347886	0.00116645
OA	Allantoin		1	±	0.403132	0.685194	±	0.18496	0.669524	0.164805	1.74333	±	0.290263	0.00926999	0.209239	0.327531	±	0.241933	0.000651212	0.026717				1	±	0.137945	0.759042	±	0.0228612	0.00407274	0.140084	0.589308	±	0.858337	0.0096508	0.0421365	6.7022	±	0.120754	0.000398388	0.00187429
OA	Threonic acid		1	±	0.0100346	0.862644	±	0.157769	0.250244	0.235086	1.92117	±	0.0230171	0.0123138	3.36745e-06	0.420547	±	0.189658	0.0537731	0.0289944				1	±	0.0827473	0.474186	±	0.109521	0.0028735	0.170191	0.769084	±	0.0637638	0.289976	0.947927	2.2096	±	0.00857202	0.0183415	1.05832e-07
OA	Shikimic acid		1	±	1.92648	0.91103	±	0.344488	0.20735	0.516734	1.30286	±	0.370639	0.306529	0.117739	0.520133	±	0.445915	0.0976946	0.0101695				1	±	0.20985	0.708803	±	0.364341	0.597608	0.138523	0.530955	±	0.0885211	0.242069	0.0102171	2.94445	±	0.0534545	0.00309634	2.7449e-06
Fatty acids
FA	n- eicosanoic acid		1	±	0.00613643	0.572709	±	0.582947	0.0212553	0.0922464	0.560768	±	0.183069	0.078822	0.0361531	0.388059	±	0.675353	0.806676	0.0517862				1	±	0.441221	1.00987	±	0.43196	0.003396	0.857468	1.68365	±	0.355444	0.173266	0.576656	1.19015	±	0.0458023	0.00305796	0.175621
FA	n- heptadecanoic acid		1	±	0.0457	0.565987	±	0.314872	0.347406	0.0976126	0.709402	±	0.151797	0.00305449	0.0587011	0.399285	±	0.467757	0.0100307	0.0383056				1	±	0.239507	0.507053	±	0.538134	0.217475	0.3743	1.18578	±	0.317819	0.711363	0.650989	1.31364	±	0.0627473	0.000117029	0.136522
FA	n- hexadecanoic acid		1	±	0.0562932	1.83777	±	0.189325	0.230414	0.471717	0.691797	±	0.0931222	0.00287876	0.0522108	1.80331	±	0.140146	0.00180653	0.125528				1	±	0.187265	2.60835	±	0.0285167	0.00180997	0.0136186	0.720767	±	0.115316	0.0352212	0.22415	0.92259	±	0.0338552	9.92115e-05	0.739331
FA	9,12- octadecadienoic acid		1	±	1.74552	1.35852	±	0.288921	0.305809	0.551115	0.440183	±	0.165671	0.418381	0.0505782	0.438652	±	0.479715	0.0171937	0.141963				1	±	0.15148	4.28753	±	0.140471	0.408282	5.69298e-05	1.51935	±	0.178821	0.0491218	0.641026	1.34726	±	0.063925	0.00201148	0.127086
FA	n-octadecanoic acid		1	±	0.225187	1.17269	±	0.172922	0.84265	0.322204	0.605526	±	0.145427	0.532051	0.0738387	1.11539	±	0.202961	0.0152615	0.365944				1	±	0.0604814	4.18996	±	0.0492561	1.36024e-07	0.000497954	1.24003	±	0.0742333	0.310472	0.175019	1.3153	±	0.0687043	9.31737e-05	0.254045
FA	Octadecenoic acid		1	±	1.47822	0.890732	±	0.338369	0.395168	0.571357	0.542862	±	0.340135	0.00301179	0.0359186	0.473656	±	0.351252	0.000146413	0.669631				1	±	0.151319	6.5036	±	0.0211244	0.0545978	2.85758e-05	4.67375	±	0.928215	0.00487367	0.596757	0.986114	±	0.154175	0.000348242	0.128576
FA	n- pentadecanoic acid		1	±	0.145263	0.626596	±	0.308095	0.149377	0.125081	1.19558	±	0.0599682	0.00637867	0.534329	0.42184	±	0.438091	0.015114	0.0399347				1	±	0.189817	0.271168	±	0.203435	0.388391	0.0448872	0.788917	±	0.232393	0.415413	0.926158	0.90488	±	0.123875	4.23026e-05	0.942826
Sugars
SG	Fructose		1	±	0.0137855	5.14874	±	0.451164	0.012137	0.116407	1.77131	±	0.126738	5.9195e-06	0.000309869	2.18109	±	0.250543	0.156079	0.848719				1	±	0.422423	3.12799	±	0.27126	0.029986	0.0419743	0.105827	±	0.485903	0.00452288	0.00714954	2.72797	±	0.0372187	0.000520493	0.000182776
SG	Galactinol		1	±	0.013787	0.55481	±	0.451164	0.0121368	0.43841	0.370712	±	0.126744	5.92289e-06	0.0237791	1.22898	±	0.250543	0.156146	0.0181081				1	±	0.422419	1.20292	±	0.271272	0.029981	0.424363	3.1575	±	0.485903	0.00452294	0.772228	2.3358	±	0.0372208	0.000520506	0.000110172
SG	Galactose		1	±	0.587512	1.03175	±	0.264412	0.990404	0.974095	1.81495	±	0.113139	2.02941e-05	0.00211585	0.381851	±	0.391067	0.00211008	0.000421891				1	±	0.227853	2.34327	±	0.259509	0.672939	3.82378e-06	0.695497	±	0.427955	0.164256	0.00395685	3.28782	±	0.041787	0.000395795	2.86781e-07
SG	Galactose-6-P		1	±	0.0964293	0.289203	±	0.0743009	0.0373523	0.0147689	0.197487	±	0.102196	0.000346226	0.960153	0.354893	±	0.0771408	0.000537187	0.0465472				1	±	0.0983969	1.92029	±	0.038939	0.000501387	0.000172878	1.01383	±	0.232173	0.0190524	0.998772	26.6866	±	0.0445868	4.79079e-05	0.00502928
SG	Galactosylglycerol		1	±	0.00232369	1.37723	±	0.500316	0.130183	0.168383	1.23583	±	0.0733044	0.00017369	0.366487	0.344004	±	0.363128	0.482559	0.00839943				1	±	0.711507	1.64663	±	0.364362	0.0450269	0.0114051	0.508729	±	0.191164	0.0127883	0.0204999	4.87843	±	0.0636754	0.000198825	2.94266e-05
SG	Glucose		1	±	0.00202143	2.07676	±	0.510741	0.133473	0.962089	1.77494	±	0.063121	0.00011452	0.0021969	1.13748	±	0.371278	0.404295	0.000421955				1	±	0.733528	4.27158	±	0.372076	0.0513876	3.82287e-06	0.461429	±	0.193037	0.0159337	0.00395504	2.73712	±	0.0581334	0.00032221	2.85731e-07
SG	Glucose-6-p		1	±	0.0266035	0.289203	±	0.165409	0.0414443	0.0147689	0.197487	±	0.097687	0.000211367	0.960153	0.354893	±	0.131273	0.00105728	0.045135				1	±	0.172979	1.92029	±	0.160495	0.00650935	0.00048265	1.01383	±	0.203913	0.000342921	0.138834	26.6866	±	0.0621733	9.23916e-05	0.0462502
SG	Glycerol		1	±	0.00389172	1.14503	±	0.456469	0.116407	0.410559	1.38946	±	0.0869157	0.000309869	0.102105	1.07528	±	0.323647	0.848719	0.557627				1	±	0.655603	1.02976	±	0.335973	0.0419743	0.95771	0.601615	±	0.211352	0.00714954	0.00863756	4.13927	±	0.0647231	0.000182776	7.3919e-05
SG	Glycerol-3-phosphate		1	±	0.00389122	0.692226	±	0.45648	0.116385	0.305809	1.17212	±	0.0872146	0.00031221	0.418381	0.293057	±	0.323669	0.849334	0.0171937				1	±	0.655611	0.773613	±	0.335976	0.0419883	0.408282	0.536851	±	0.211385	0.0071477	0.0491218	2.01455	±	0.0647569	0.000182859	0.00201148
SG	Gulose		1	±	1.48195	3.61049	±	0.416601	0.508845	0.0768191	1.80298	±	0.267561	0.0477404	0.00140517	2.04679	±	0.396284	0.00452298	0.564808				1	±	0.11331	5.79935	±	0.45722	0.0465239	0.00819006	0.299271	±	0.82358	0.00373468	0.0643412	3.06624	±	0.0741446	0.000222558	1.00871e-06
SG	Lactose		1	±	0.00647385	1.33073	±	0.429268	0.0768191	0.777251	4.74644	±	0.107865	0.00140517	0.000213688	0.0933504	±	0.37453	0.564808	0.00100222				1	±	0.558522	1.11415	±	0.340749	0.00819006	0.372983	0.24162	±	0.103114	0.0643412	0.0857859	7.93175	±	0.0566094	1.00871e-06	5.57748e-06
SG	Raffinose		1	±	0.0124684	3.19023	±	0.279028	0.062795	0.000216845	3.32274	±	0.0960557	0.000791578	8.34035e-05	0.360316	±	0.282899	0.84225	4.67418e-06				1	±	0.335034	15.1865	±	0.254478	0.00385227	5.12937e-05	0.384733	±	0.109588	0.0330171	0.0133955	12.3519	±	0.048792	2.76883e-06	3.30929e-06
SG	Sorbose		1	±	0.0905834	5.53561	±	0.150543	0.962089	0.116385	1.728	±	0.115889	0.0021969	0.00031221	2.48769	±	0.13993	0.000421955	0.849334				1	±	0.05543	2.96589	±	0.0634744	3.82287e-06	0.0419883	0.101924	±	0.0844655	0.00395504	0.0071477	2.53853	±	0.0639886	2.85731e-07	0.000182859
SG	Sucrose		1	±	0.0908961	2.47648	±	0.150489	0.974095	0.170838	1.32339	±	0.115889	0.00211585	0.172564	3.60924	±	0.139932	0.000421891	0.12879				1	±	0.05543	1.22271	±	0.0634778	3.82378e-06	0.321274	0.472359	±	0.0844402	0.00395685	0.282746	0.769718	±	0.0640945	2.86781e-07	0.0332279
SG	Trehalose		1	±	0.00582282	0.881846	±	0.473263	0.0273014	0.722955	0.550129	±	0.0930105	3.54055e-05	0.145822	0.996337	±	0.371404	0.59497	0.735095				1	±	0.277532	0.304116	±	0.34334	0.00370858	0.00890774	0.727068	±	0.0298931	0.0101889	0.402247	2.0249	±	0.0295861	8.00653e-12	1.7679e-05
SG	Xylose		1	±	0.252066	0.934333	±	0.112017	0.521852	0.353568	1.45037	±	0.190152	0.155001	0.445534	0.547911	±	0.240504	0.00494864	0.116501				1	±	0.0947365	0.634779	±	0.0721685	0.00744071	0.112985	0.698571	±	0.416385	0.00805793	0.220718	1.73605	±	0.0890764	1.47413e-05	0.000347886
SG	Inositol		1	±	0.442362	0.849792	±	0.289818	0.111816	0.29493	1.30515	±	0.139539	0.612868	0.0982401	0.508823	±	0.397282	0.0547025	0.00339263				1	±	0.166156	1.1628	±	0.349323	0.00871984	0.00637673	0.740533	±	0.245148	0.418151	0.0017383	1.87196	±	0.032306	0.47702	4.28534e-06
SG	L-chiro-inositol		1	±	0.693571	0.769396	±	0.29663	0.125081	0.19935	1.31394	±	0.157532	0.534329	0.0969473	0.424384	±	0.417753	0.0399347	0.00672891				1	±	0.188808	0.931836	±	0.459237	0.0448872	0.476927	0.80681	±	0.237351	0.926158	0.0399663	1.90061	±	0.0341322	0.942826	2.67092e-06
SG	myo-inositol		1	±	1.15809	0.849792	±	0.621977	0.495652	0.29493	1.30515	±	0.528978	0.0558487	0.0982401	0.508823	±	0.449842	0.0153459	0.00339263				1	±	0.168119	1.1628	±	0.336254	0.0099032	0.00637673	0.740533	±	0.169107	0.679418	0.0017383	1.87196	±	0.0561773	0.17776	4.28534e-06
SG	myo-inositol-2-phosphate		1	±	0.418823	0.645098	±	0.265067	0.200997	0.201707	0.891418	±	0.264335	0.232817	0.834623	0.364852	±	0.360968	0.356826	0.03121				1	±	0.419648	0.60307	±	0.220382	0.0908748	0.206272	0.858704	±	0.0775563	0.0700573	0.784238	0.661287	±	0.0245154	2.3996e-07	0.144882
SG	Galactonate		1	±	0.418823	0.738257	±	0.265067	0.200997	0.200997	0.755089	±	0.264335	0.232817	0.232817	0.6224	±	0.360968	0.356826	0.356826				1	±	0.419648	2.34436	±	0.220382	0.0908748	0.0908748	2.31029	±	0.0775563	0.0700573	0.0700573	2.40593	±	0.0245154	2.3996e-07	2.3996e-07
SG	Gluconate		1	±	0.478895	0.738257	±	0.446789	0.536585	0.200997	0.755089	±	0.322451	0.375651	0.232817	0.6224	±	0.529806	0.0903803	0.356826				1	±	0.20502	2.34436	±	0.564828	0.300778	0.0908748	2.31029	±	0.176281	0.0292248	0.0700573	2.40593	±	0.12619	0.81058	2.3996e-07
SG	Glucopyranose		1	±	0.00358913	1.62918	±	0.441359	0.471717	0.495652	3.81279	±	0.183472	0.0522108	0.0558487	0.144262	±	0.222253	0.125528	0.0153459				1	±	0.236284	0.247287	±	0.219345	0.0136186	0.0099032	0.774389	±	0.271514	0.22415	0.679418	1.23421	±	0.0420813	0.739331	0.17776
Unknowns
UN	Unknown 1		1	±	0.633244	4.01109	±	0.38255	0.164805	0.164068	1.85967	±	0.318581	0.209239	0.000775244	1.45263	±	0.361672	0.026717	0.110577				1	±	0.105303	3.02596	±	0.404258	0.140084	0.768162	3.03008	±	0.61203	0.0421365	0.0877898	3.03008	±	0.0814821	0.00187429	0.113019
UN	Unknown 2		1	±	0.132253	2.14684	±	0.185665	0.19935	0.0529977	2.70368	±	0.107331	0.0969473	0.000775244	0.162264	±	0.236785	0.00672891	0.0528526				1	±	0.0587545	0.558339	±	0.075073	0.476927	0.0570925	7.92931	±	0.0655165	0.0399663	0.745346	7.92931	±	0.0316328	2.67092e-06	0.298417
UN	Unknown 3		1	±	0.0698014	3.61049	±	0.103206	0.29493	0.0549242	1.80298	±	0.105487	0.0982401	0.000775244	2.04679	±	0.135638	0.00339263	0.0165909				1	±	0.0369316	5.79935	±	0.0266637	0.00637673	0.746332	3.06624	±	0.0685805	0.0017383	0.760246	3.06624	±	0.031016	4.28534e-06	0.00120645
UN	Unknown 4		1	±	0.328991	2.07676	±	0.307708	0.0759899	0.612262	1.77494	±	0.0855703	0.0317103	0.000775244	1.13748	±	0.419529	0.0510011	0.00128016				1	±	0.186144	4.27158	±	0.480707	0.0361758	0.557562	2.73712	±	0.250725	0.584011	0.024883	2.73712	±	0.0399284	0.0467806	0.00103979
UN	Unknown 5		1	±	1.36651	1.02894	±	0.303672	0.14174	0.00301359	1.80892	±	0.187549	0.952068	0.000775244	0.381857	±	0.430143	0.0705398	0.000166066				1	±	0.200571	2.34325	±	0.337787	0.64395	0.000450371	3.28739	±	0.19815	0.301497	0.00104465	3.28739	±	0.0439481	0.0126702	0.000128198
UN	Unknown 6		1	±	0.48795	1.03175	±	0.377459	0.0976126	0.112008	1.81495	±	0.159148	0.0587011	0.000775244	0.381851	±	0.458657	0.0383056	0.0410535				1	±	0.197378	2.34327	±	0.503943	0.3743	0.00290495	3.28782	±	0.344269	0.650989	0.80785	3.28782	±	0.0457557	0.136522	0.000465916
UN	Unknown 7		1	±	0.764956	6.19002	±	0.667002	0.211429	0.200581	2.41119	±	0.268377	0.0173963	0.000775244	1.11832	±	0.401819	0.117898	0.00205895				1	±	0.184313	8.26481	±	0.354824	0.285439	0.794522	4.22402	±	0.404612	0.262435	0.178278	4.22402	±	0.0909253	0.891343	0.000564455
UN	Unknown 8		1	±	0.12412	1.08035	±	0.236094	0.551115	0.669524	1.51588	±	0.266564	0.0505782	0.000775244	0.340948	±	0.271847	0.141963	0.000651212				1	±	0.12886	1.57681	±	0.100377	5.69298e-05	0.00407274	8.27598	±	0.33671	0.641026	0.0096508	8.27598	±	0.0600409	0.127086	0.000398388
UN	Unknown 9		1	±	0.0241478	0.612662	±	0.270717	0.322204	0.250244	1.10341	±	0.299728	0.0738387	0.000775244	0.52218	±	0.37889	0.365944	0.0537731				1	±	0.185772	0.261047	±	0.0515214	0.000497954	0.0028735	1.03859	±	0.506188	0.175019	0.289976	1.03859	±	0.112535	0.254045	0.0183415
UN	Unknown 10		1	±	0.00960202	0.626596	±	0.425466	0.571357	0.20735	1.19558	±	0.201265	0.0359186	0.000775244	0.42184	±	0.184384	0.669631	0.0976946				1	±	0.00715534	0.271168	±	0.165085	2.85758e-05	0.597608	0.90488	±	0.406955	0.596757	0.242069	0.90488	±	0.0505843	0.128576	0.00309634
UN	Unknown 11		1	±	0.521648	1.62918	±	0.259437	0.350565	0.0414443	3.81279	±	0.108164	0.779391	0.000775244	0.144262	±	0.34307	0.0122054	0.00105728				1	±	0.186883	0.247287	±	0.216145	0.904313	0.00650935	1.23421	±	0.10137	0.765718	0.000342921	1.23421	±	0.0477944	3.63298e-07	9.23916e-05
UN	Unknown 12		1	±	0.848626	0.738257	±	0.297182	0.224975	0.14174	0.755089	±	0.142438	0.947616	0.000775244	0.6224	±	0.404507	0.0337377	0.0705398				1	±	0.178288	2.34436	±	0.285439	0.0981346	0.64395	2.40593	±	0.180398	0.200965	0.301497	2.40593	±	0.0354057	2.51158e-06	0.0126702
UN	Unknown 13		1	±	0.240988	0.738257	±	0.155778	0.168383	0.350565	0.755089	±	0.171015	0.366487	0.000775244	0.6224	±	0.274524	0.00839943	0.0122054				1	±	0.13087	2.34436	±	0.0605474	0.0114051	0.904313	2.40593	±	0.350499	0.0204999	0.765718	2.40593	±	0.049196	2.94266e-05	3.63298e-07
UN	Unknown 14		1	±	0.005847	1.24406	±	0.336742	0.0147689	0.224975	1.78154	±	0.56421	0.960153	0.000775244	0.397184	±	0.824599	0.0465472	0.0337377				1	±	1	0.371996	±	0.761455	0.000172878	0.0981346	0.780516	±	1	0.998772	0.200965	0.780516	±	0.215922	0.00502928	2.51158e-06
UN	Unknown 15		1	±	0.623351	1.83777	±	0.336742	0.0147689	0.187797	0.691797	±	0.56421	0.960153	0.000775244	1.80331	±	0.825226	0.045135	0.00862998				1	±	0.214081	2.60835	±	0.761455	0.00048265	0.00877636	0.92259	±	0.841029	0.138834	0.528027	0.92259	±	0.11889	0.0462502	0.00523265
UN	Unknown 16		1	±	0.002541	0.849792	±	0.336742	0.0147689	0.360639	1.30515	±	0.56421	0.960153	0.000775244	0.508823	±	0.824599	0.0465472	0.0275706				1	±	1	1.1628	±	0.761455	0.000172878	0.680741	1.87196	±	1	0.998772	0.240124	1.87196	±	0.215922	0.00502928	0.139515
UN	Unknown 17		1	±	2.02192	0.685194	±	0.295757	0.201707	0.592474	1.74333	±	0.158993	0.834623	0.000775244	0.327531	±	0.478919	0.03121	0.000179206				1	±	0.17784	0.759042	±	0.256957	0.206272	0.0250096	6.7022	±	0.199195	0.784238	0.016171	6.7022	±	0.114747	0.144882	5.21946e-06
UN	Unknown 18		1	±	0.243719	0.769396	±	0.414507	0.0922464	0.0623575	1.31394	±	0.218126	0.0361531	0.000775244	0.424384	±	0.477606	0.0517862	0.273235				1	±	0.19469	0.931836	±	0.378566	0.857468	0.952847	1.90061	±	0.424745	0.576656	0.101818	1.90061	±	0.0619533	0.175621	0.0166331
UN	Unknown 19		1	±	0.135548	0.849792	±	0.429269	0.187797	0.168996	1.30515	±	0.594162	0.632046	0.000775244	0.508823	±	0.679542	0.00862998	0.0579582				1	±	0.229202	1.1628	±	0.389047	0.00877636	0.54523	1.87196	±	0.659072	0.528027	0.277536	1.87196	±	0.191265	0.00523265	1.19626e-07

## Sheet: Table S2
Supplementray Table S2. List of identified and unknwon metabolites from GC-MS analyses in roots of cv. Vlamingh and cv. Gairdner from four treatments- control, control + fungus (Trichoderma harzianum), salt (200 mM NaCl) and salt + fungus
Samples	Group	Lactic acid	Hydroxylamine	NA	Phosphoric acid monomethyl ester	Valine	Urea	Ethanolamine	Phosphoric acid	Glycerol	Isoleucine	Proline	Nicotinic acid	Succinic acid	Glyceric acid	Serine	3-cyano-alanine	Threonine	betalanine	NA	NA	L-Glutamine	Malic acid	NA	Nicotiamide	NA	Aspartic acid	Methionine	Pyroglutamic acid	4-amino-butyric acid	Erythronic acid	Threonic acid	2-oxo-Glutaric acid	NA	Glutamic acid	Phenylalanine	2,4,5-Trihydroxypentanoic acid	NA	Asparagine	Xylose	NA	Alanine	NA	NA	Ribonic acid	Aconitic acid	2-Keto-L-gluconic acid	Glycerol-3-phosphate	alpha-D-Methylfructofuranoside
VC1	VC	-0.0739318	0.795469	0.285328	-0.470113	1.51853	0.186266	0.735499	0.450526	0.359001	-0.0664715	-0.408027	-1.22223	-0.570866	-1.58659	0.59434	0.310484	-0.167444	-1.31981	-1.15117	-1.28692	0.304154	0.710239	-0.779272	-1.37783	0.143612	0.892218	0.892217	1.77529	0.175849	0.908004	-1.10961	-1.21537	-0.738829	0.663496	-0.362764	-1.43978	-0.846278	0.32448	-0.439934	-0.312722	1.06886	-0.310569	-1.39355	-1.13779	-1.4187	-0.343502	-0.683097	0.0574648
VC2	VC	-0.0986846	0.779768	0.346621	-0.447376	1.52939	0.266281	0.622295	0.456991	0.312704	-0.118169	-0.37976	-1.23699	-0.594855	-1.59296	0.553803	0.30536	-0.226273	-1.35727	-1.14965	-1.25554	0.23246	0.701014	-0.786996	-1.39361	0.143561	0.886667	0.886667	1.75748	0.160077	0.841571	-1.09386	-1.2391	-0.749281	0.660472	-0.376676	-1.47569	-0.872563	0.333288	-0.468284	-0.358701	0.975263	-0.290968	-1.44952	-1.20363	-1.51645	-0.429127	-0.632892	0.0152309
VC3	VC	-0.246875	1.52813	0.815829	-0.849278	3.0805	0.69259	1.01818	0.926912	0.532812	-0.339734	-0.702987	-2.50352	-1.23769	-3.19864	1.02653	0.600471	-0.570202	-2.78944	-2.29625	-2.44833	0.321533	1.38358	-1.58944	-2.81877	0.287019	1.76223	1.76223	3.47936	0.288609	1.55028	-2.15621	-2.52568	-1.51946	1.3149	-0.781177	-3.0232	-1.79769	0.684194	-0.99327	-0.809359	1.76332	-0.542734	-3.01097	-2.53894	-3.22839	-1.0295	-1.16538	-0.054006
VC4	VC	-0.0986846	0.779768	0.346621	-0.447376	1.52939	0.266281	0.622295	0.456991	0.312704	-0.118169	-0.37976	-1.23699	-0.594855	-1.59296	0.553803	0.30536	-0.226273	-1.35727	-1.14965	-1.25554	0.23246	0.701014	-0.786996	-1.39361	0.143561	0.886667	0.886667	1.75748	0.160077	0.841571	-1.09386	-1.2391	-0.749281	0.660472	-0.376676	-1.47569	-0.872563	0.333288	-0.468284	-0.358701	0.975263	-0.290968	-1.44952	-1.20363	-1.51645	-0.429127	-0.632892	0.0152309
VC5	VC	-0.0491789	0.811171	0.224034	-0.492849	1.50766	0.106252	0.848703	0.444061	0.405299	-0.0147739	-0.436294	-1.20746	-0.546877	-1.58023	0.634876	0.315608	-0.108616	-1.28236	-1.1527	-1.3183	0.375848	0.719463	-0.771549	-1.36205	0.143663	0.897768	0.897768	1.79309	0.191621	0.974437	-1.12537	-1.19163	-0.728378	0.66652	-0.348851	-1.40387	-0.819994	0.315671	-0.411583	-0.266742	1.16247	-0.33017	-1.33758	-1.07195	-1.32096	-0.257876	-0.733302	0.0996986
VC6	VC	-0.14819	0.748364	0.469208	-0.401902	1.55111	0.426309	0.395887	0.469921	0.220108	-0.221564	-0.323227	-1.26653	-0.642834	-1.60569	0.47273	0.295111	-0.343929	-1.43218	-1.1466	-1.19279	0.0890725	0.682566	-0.802443	-1.42517	0.143458	0.875566	0.875566	1.72188	0.128532	0.708705	-1.06235	-1.28658	-0.770183	0.654425	-0.404501	-1.54751	-0.925132	0.350905	-0.524985	-0.450659	0.788059	-0.251766	-1.56145	-1.33531	-1.71194	-0.600378	-0.532483	-0.0692369
VCF1	VCF	0.364335	1.62921	0.485613	-0.428529	2.44258	0.521029	0.896765	0.94176	0.43093	0.140578	-0.00631985	-2.24785	-0.735721	-2.41007	1.08856	0.320895	0.0947631	-2.03833	-2.16037	-1.48174	0.260576	1.42479	-1.07168	-2.40191	0.0186738	1.35868	1.35868	2.71965	0.752745	1.05265	-1.70018	-1.64524	-1.82665	1.25684	-0.265138	-2.22092	-1.12386	0.477588	-0.719299	-0.109278	2.3711	-0.614226	-1.96647	-1.61629	-2.4379	-0.017131	-0.827845	0.472746
VCF2	VCF	0.215038	0.942253	0.252903	-0.409768	1.41149	0.276856	0.573384	0.522977	0.0970218	-0.0546552	-0.252016	-1.34878	-0.501958	-1.46546	0.568021	0.0363398	-0.0744403	-1.39602	-1.08979	-0.864993	-0.0908097	0.806636	-0.698581	-1.46006	-0.0439679	0.846696	0.846703	1.61673	0.210393	0.762732	-1.09947	-1.07513	-1.04585	0.748031	-0.245911	-1.49117	-0.760473	0.284515	-0.639659	-0.165796	1.26077	-0.414853	-1.31133	-0.927532	-1.42904	-0.0878502	-0.682184	0.371801
VCF3	VCF	0.306376	1.30781	0.381107	-0.325281	1.94447	0.439815	0.754679	0.767714	0.348512	0.135817	-0.0103804	-1.79007	-0.57858	-1.89674	0.900218	0.194567	0.0977442	-1.61178	-1.74067	-1.17033	0.160077	1.16605	-0.833402	-1.89699	-0.036186	1.10606	1.10607	2.19312	0.599934	0.964398	-1.34535	-1.29117	-1.49415	1.04059	-0.189614	-1.79159	-0.900748	0.360592	-0.580409	-0.0984724	1.83608	-0.50102	-1.57774	-1.26453	-1.92017	-0.00341477	-0.627889	0.42455
VCF4	VCF	0.393314	1.78991	0.537866	-0.480153	2.69164	0.561636	0.967807	1.02878	0.472139	0.142958	-0.00428955	-2.47674	-0.814292	-2.66673	1.18272	0.384059	0.0932726	-2.2516	-2.37022	-1.63745	0.310826	1.55416	-1.19082	-2.65437	0.0461037	1.48498	1.48499	2.98291	0.829151	1.09677	-1.87759	-1.82228	-1.99289	1.36497	-0.3029	-2.43559	-1.23542	0.536085	-0.788744	-0.114681	2.63862	-0.670829	-2.16083	-1.79216	-2.69676	-0.0239891	-0.927823	0.496844
VCF5	VCF	0.422294	1.95061	0.590119	-0.531777	2.94069	0.602243	1.03885	1.11581	0.513347	0.145339	-0.00225925	-2.70563	-0.892863	-2.92339	1.27689	0.447223	0.091782	-2.46487	-2.58008	-1.79316	0.361076	1.68353	-1.30996	-2.90684	0.0735336	1.61129	1.61129	3.24617	0.905557	1.14089	-2.05501	-1.99931	-2.15914	1.4731	-0.340662	-2.65026	-1.34698	0.594583	-0.858188	-0.120084	2.90613	-0.727431	-2.3552	-1.96804	-2.95562	-0.0308472	-1.0278	0.520942
VCF6	VCF	0.318666	1.44643	0.421511	-0.470772	2.17609	0.439549	0.806117	0.819391	0.305185	0.0453417	-0.127137	-2.02721	-0.69741	-2.19443	0.922456	0.241781	0.00867085	-1.93045	-1.83493	-1.32907	0.135133	1.24508	-1.00427	-2.18345	0.0147828	1.22899	1.229	2.43145	0.557975	0.951813	-1.57724	-1.53722	-1.60249	1.11057	-0.293286	-2.07071	-1.05372	0.439549	-0.748923	-0.14294	2.08345	-0.571142	-1.83326	-1.44778	-2.19233	-0.0593487	-0.854992	0.446371
VS1	VS	-0.00585281	0.973464	0.22921	-0.813761	1.55356	0.127972	0.292337	0.375736	0.189724	-0.142075	0.375684	-1.18232	-0.720139	-1.55838	0.471498	-0.25108	-0.209204	-1.13342	-1.17614	-1.44347	-0.534958	-0.14695	-1.62438	-1.14148	-0.700222	0.726782	0.726782	1.23581	0.174167	0.99446	-1.30214	-1.67276	-0.763187	0.500894	-0.573139	-1.34065	-1.39366	-0.826213	-0.659178	-1.57853	0.51533	-0.239641	-1.36458	-1.20655	-1.93905	-0.263336	-0.97904	0.0124495
VS2	VS	-0.465124	0.74632	0.138421	-1.22011	1.41727	-0.171643	0.122788	-0.0294892	0.0048548	-0.30216	0.209739	-1.36842	-0.934733	-1.66161	0.248751	-0.21379	-0.376663	-1.20369	-1.66526	-1.72017	-0.699704	-0.464205	-1.93894	-0.956614	-0.710643	0.533547	0.533547	0.881744	0.0174823	1.27095	-1.32447	-2.1074	-0.907305	0.350363	-0.655289	-1.10498	-1.6487	-1.16898	-0.593957	-1.52544	1.06571	-0.279733	-1.4704	-1.17361	-2.18994	-0.0629438	-1.20424	0.0972846
VS3	VS	-0.350306	0.803106	0.161118	-1.11852	1.45134	-0.0967392	0.165176	0.071817	0.0510722	-0.262139	0.251225	-1.32189	-0.881085	-1.6358	0.304438	-0.223113	-0.334798	-1.18612	-1.54298	-1.651	-0.658517	-0.384891	-1.8603	-1.00283	-0.708038	0.581856	0.581856	0.97026	0.0566535	1.20183	-1.31889	-1.99874	-0.871275	0.387996	-0.634752	-1.1639	-1.58494	-1.08329	-0.610263	-1.53871	0.928118	-0.26971	-1.44394	-1.18185	-2.12722	-0.113042	-1.14794	0.0760758
VS4	VS	-0.235488	0.859892	0.183816	-1.01693	1.48542	-0.0218356	0.207563	0.173123	0.0972895	-0.222118	0.292712	-1.27537	-0.827436	-1.61	0.360125	-0.232435	-0.292934	-1.16855	-1.4207	-1.58182	-0.617331	-0.305577	-1.78166	-1.04905	-0.705433	0.630165	0.630165	1.05878	0.0958247	1.1327	-1.31331	-1.89008	-0.835246	0.425628	-0.614214	-1.22282	-1.52118	-0.997596	-0.626568	-1.55198	0.790522	-0.259687	-1.41749	-1.19008	-2.06449	-0.16314	-1.09164	0.0548671
VS5	VS	-0.292897	0.831499	0.172467	-1.06773	1.46838	-0.0592874	0.186369	0.12247	0.0741808	-0.242128	0.271969	-1.29863	-0.85426	-1.6229	0.332281	-0.227774	-0.313866	-1.17734	-1.48184	-1.61641	-0.637924	-0.345234	-1.82098	-1.02594	-0.706735	0.60601	0.60601	1.01452	0.0762391	1.16727	-1.3161	-1.94441	-0.853261	0.406812	-0.624483	-1.19336	-1.55306	-1.04044	-0.618415	-1.54535	0.85932	-0.264698	-1.43072	-1.18596	-2.09585	-0.138091	-1.11979	0.0654715
VS6	VS	-0.235488	0.859892	0.183816	-1.01693	1.48542	-0.0218356	0.207563	0.173123	0.0972895	-0.222118	0.292712	-1.27537	-0.827436	-1.61	0.360125	-0.232435	-0.292934	-1.16855	-1.4207	-1.58182	-0.617331	-0.305577	-1.78166	-1.04905	-0.705433	0.630165	0.630165	1.05878	0.0958247	1.1327	-1.31331	-1.89008	-0.835246	0.425628	-0.614214	-1.22282	-1.52118	-0.997596	-0.626568	-1.55198	0.790522	-0.259687	-1.41749	-1.19008	-2.06449	-0.16314	-1.09164	0.0548671
VSF1	VSF	1.09403	0.955852	0.317248	-0.545874	1.44856	0.821806	0.67203	0.406551	0.88736	0.429281	0.807693	-1.22918	-0.393533	-1.30964	1.17634	0.322048	0.317459	-1.06186	-1.51191	-0.638806	0.181321	0.871703	-0.624344	-1.25581	0.435131	1.10556	1.10557	1.8257	0.802506	0.953758	-0.92729	-0.869241	-1.32957	0.972039	0.0499186	-0.802146	-0.439538	0.981224	-0.434363	0.203895	1.56267	-0.370721	-1.1492	-0.776854	-1.1097	0.197902	-0.712104	0.322387
VSF2	VSF	0.727785	0.964094	0.320107	-0.530102	1.46381	0.633008	0.562828	0.483524	0.565881	0.35183	0.795925	-1.20596	-0.432967	-1.38363	0.983105	0.342708	0.229993	-1.08513	-1.31843	-0.644813	0.143902	0.752078	-0.742816	-1.28774	0.41003	1.0731	1.0731	1.77288	0.704707	0.709601	-0.988708	-0.997056	-1.16724	0.922757	-0.0261474	-0.992355	-0.520499	0.895486	-0.511876	0.161121	1.58843	-0.364887	-1.21371	-0.849667	-1.25436	0.132904	-0.672444	0.227969
VSF3	VSF	0.633917	0.908034	0.284319	-0.55727	1.4532	0.664354	0.560181	0.460449	0.576265	0.290381	0.653823	-1.20773	-0.4262	-1.38259	0.980752	0.314785	0.213251	-1.09985	-1.34776	-0.74069	0.0589044	0.814696	-0.680368	-1.24598	0.345056	1.0945	1.0945	1.76984	0.626387	0.851975	-0.942325	-0.96021	-1.11867	0.921044	-0.0595311	-0.963655	-0.686033	0.802119	-0.417617	-0.0357036	1.49931	-0.355125	-1.25168	-0.806992	-1.19416	0.139391	-0.599973	0.370762
VSF4	VSF	0.971951	0.9586	0.318201	-0.540617	1.45364	0.758874	0.635629	0.432209	0.7802	0.403464	0.80377	-1.22144	-0.406677	-1.3343	1.11193	0.328935	0.288304	-1.06962	-1.44742	-0.640808	0.168848	0.831828	-0.663835	-1.26645	0.426764	1.09474	1.09475	1.8081	0.769906	0.872372	-0.947763	-0.911846	-1.27546	0.955612	0.0245633	-0.865549	-0.466525	0.952645	-0.460201	0.189637	1.57125	-0.368776	-1.17071	-0.801125	-1.15792	0.176236	-0.698884	0.290914
VSF5	VSF	1.21612	0.953105	0.316295	-0.551131	1.44347	0.884739	0.708431	0.380893	0.99452	0.455098	0.811616	-1.23692	-0.380388	-1.28498	1.24075	0.315161	0.346615	-1.05411	-1.5764	-0.636804	0.193794	0.911578	-0.584854	-1.24516	0.443498	1.11639	1.11639	1.84331	0.835105	1.03514	-0.906817	-0.826636	-1.38368	0.988466	0.075274	-0.738743	-0.41255	1.0098	-0.408525	0.218153	1.55408	-0.372666	-1.1277	-0.752582	-1.06147	0.219568	-0.725324	0.353859
VSF6	VSF	0.586983	0.880004	0.266425	-0.570854	1.44789	0.680027	0.558858	0.448912	0.581458	0.259657	0.582772	-1.20862	-0.422817	-1.38208	0.979575	0.300823	0.20488	-1.1072	-1.36242	-0.788629	0.0164055	0.846005	-0.649144	-1.2251	0.312569	1.10519	1.1052	1.76832	0.587227	0.923162	-0.919133	-0.941787	-1.09439	0.920188	-0.076223	-0.949305	-0.7688	0.755436	-0.370487	-0.134116	1.45476	-0.350245	-1.27067	-0.785655	-1.16407	0.142634	-0.563737	0.442159
GC1	GC	0.428925	0.905411	-0.0390428	-0.76871	1.41077	0.15792	-0.874836	0.164251	0.383254	0.083835	-0.285499	-0.499528	-1.36956	-0.636516	-1.49998	-0.689463	-0.22553	-1.69566	-1.09055	-1.23565	-0.375749	0.223658	-1.26571	-1.53768	-1.02079	0.478458	0.478458	1.13021	0.12034	0.955473	-1.47209	-1.48123	-0.961411	0.472408	-0.40445	-1.61068	-1.26708	-0.990394	-0.950334	-0.668026	1.31846	-0.406649	-2.00484	-1.14268	-2.02192	-0.356995	-1.24169	-0.479009
GC2	GC	0.595222	1.16572	0.308135	-1.29191	1.60396	-0.0407952	-0.579862	0.423765	0.142653	-0.0367862	-0.154276	-0.17744	-1.1177	-0.584455	-1.42433	-0.530569	-0.300453	-1.60013	-0.723433	-1.29669	-0.502501	0.41013	-1.07452	-1.30887	-0.970426	0.362867	0.362867	1.20089	0.14105	0.644434	-1.34662	-1.76027	-0.594524	0.335811	-0.619711	-1.59187	-1.21666	-1.06073	-0.898228	-1.04382	0.750874	-0.420874	-1.89462	-1.30876	-2.32465	-0.478188	-1.64545	-0.684916
GC3	GC	0.47921	0.917465	0.139053	-1.14709	1.44562	0.26117	-0.839835	0.123165	0.122734	0.459407	-0.113695	0.420834	-1.04872	-0.626167	-1.57367	-0.433041	-0.11342	-1.49446	-1.07209	-1.11657	-0.442333	0.309264	-1.19617	-0.790392	-0.659078	0.563452	0.563451	1.32949	0.097315	0.586601	-1.36558	-1.73836	-1.05544	0.600171	-0.304524	-1.61059	-1.03889	-0.534356	-0.875758	-0.382386	1.41608	-0.384492	-1.90265	-1.19861	-2.04711	-0.306614	-1.3635	-0.368897
GC4	GC	0.512074	1.03557	0.134546	-1.03031	1.50736	0.0585625	-0.727349	0.294008	0.262954	0.0235244	-0.219887	-0.338484	-1.24363	-0.610485	-1.46215	-0.610016	-0.262991	-1.6479	-0.906991	-1.26617	-0.439125	0.316894	-1.17011	-1.42327	-0.99561	0.420662	0.420662	1.16555	0.130695	0.799953	-1.40935	-1.62075	-0.777968	0.404109	-0.512081	-1.60127	-1.24187	-1.02556	-0.924281	-0.855921	1.03467	-0.413762	-1.94973	-1.22572	-2.17329	-0.417592	-1.44357	-0.581963
GC5	GC	0.473979	0.928908	0.0960145	-0.953255	1.4217	0.218619	-0.726564	0.419185	0.262933	0.688062	-0.118692	-0.0636307	-0.665303	-0.629268	-1.52159	-0.41684	-0.0208385	-1.45858	-1.02329	-1.13397	-0.205167	0.392318	-1.11276	-0.165555	-0.737161	0.689043	0.689043	1.29168	0.0934819	0.50671	-1.37163	-1.50613	-0.870979	0.676902	-0.203771	-1.60968	-1.07065	-0.720358	-0.907507	-0.453683	1.34766	-0.393227	-1.88793	-1.07885	-1.90383	-0.376554	-0.756581	-0.0118605
GC6	GC	0.310344	0.904737	0.0169674	-0.803465	1.40681	-0.0308172	-0.899092	0.242198	0.376193	0.0618465	-0.259546	-0.234837	-1.3267	-0.594401	-1.4927	-0.46855	-0.27442	-1.62454	-1.00069	-1.22304	-0.179096	0.436313	-1.05978	-1.47764	-0.771398	0.53825	0.53825	1.27496	0.107724	0.197937	-1.32394	-1.36571	-0.923505	0.541241	-0.412235	-1.58178	-1.11422	-0.705474	-1.02454	-0.563717	1.09851	-0.415002	-1.9004	-1.11704	-1.87028	-0.313316	-1.14245	-0.365944
GCF1	GCF	0.113744	0.264071	-0.28765	-0.898097	1.45803	-0.0672791	-1.16733	0.531849	0.0461371	-0.0596092	-0.139051	-0.404784	-1.36587	-0.589715	-1.58408	-0.484623	-0.130403	-1.6849	-1.37172	-1.62124	-0.145653	0.485244	-1.01203	-1.26339	-0.549663	0.732591	0.732591	1.16631	-0.0444641	0.710548	-1.44434	-1.51777	-1.07766	0.585567	-0.315995	-1.71774	-1.26268	-0.440876	-0.892245	-0.504338	1.66105	-0.386361	-1.92076	-1.05209	-1.82503	-0.365581	-1.14762	-0.249898
GCF2	GCF	0.110289	0.934047	0.0760493	-1.14738	1.411	-0.340678	-0.954008	0.470901	0.205863	0.313448	-0.111465	-0.259116	-1.17519	-0.540579	-1.53368	0.0449418	-0.255128	-1.54133	-0.923189	-1.25622	-0.106385	0.480387	-1.00715	-1.35428	-0.338315	0.654726	0.654726	1.24	0.00872075	0.586451	-1.36475	-1.54296	-0.773019	0.428843	-0.385854	-1.51746	-1.03918	-0.587492	-0.949835	-0.45402	1.52016	-0.344135	-1.91118	-1.35696	-1.78045	-0.50404	-1.11236	-0.495176
GCF3	GCF	0.222305	1.53311	-0.029751	-2.17012	2.84552	-0.544656	-2.01468	0.972276	0.331864	0.440367	-0.236723	-0.591066	-2.44571	-1.10573	-3.09256	-0.174899	-0.447894	-3.15444	-2.07064	-2.69495	-0.232405	0.963202	-2.01674	-2.66312	-0.782304	1.34838	1.34838	2.44315	-0.00915094	1.23495	-2.7693	-3.07332	-1.69836	0.936048	-0.736779	-3.13507	-2.19012	-1.10168	-1.87087	-0.933198	3.11076	-0.709384	-3.82714	-2.56148	-3.58319	-0.93885	-2.24235	-0.867714
GCF4	GCF	0.112016	0.599059	-0.1058	-1.02274	1.43452	-0.203978	-1.06067	0.501375	0.126	0.126919	-0.125258	-0.33195	-1.27053	-0.565147	-1.55888	-0.219841	-0.192766	-1.61311	-1.14745	-1.43873	-0.126019	0.482815	-1.00959	-1.30884	-0.443989	0.693658	0.693658	1.20315	-0.0178717	0.6485	-1.40455	-1.53037	-0.925338	0.507205	-0.350925	-1.6176	-1.15093	-0.514184	-0.92104	-0.479179	1.5906	-0.365248	-1.91597	-1.20452	-1.80274	-0.43481	-1.12999	-0.372537
GCF5	GCF	-0.0791915	0.92947	-0.114883	-2.01798	2.89412	-0.312829	-2.20362	1.06899	0.110811	0.359769	-0.258064	-0.685668	-2.50184	-1.13933	-3.2718	-0.411742	-0.371912	-3.40586	-2.63364	-3.00651	-0.0455618	1.2076	-1.78619	-2.39384	-0.703799	1.31899	1.31899	2.6045	-0.0356149	0.919987	-2.51529	-3.03438	-1.92207	1.03302	-0.720857	-3.06135	-2.42216	-0.621769	-1.51495	-1.01557	3.13656	-0.823144	-3.59036	-2.18588	-3.73718	-0.60084	-2.37943	-0.515027
GCF6	GCF	-0.192936	0.665399	0.172767	-1.11989	1.43609	-0.24555	-1.03629	0.537144	0.0646735	0.419378	-0.119013	-0.280884	-1.13597	-0.54962	-1.68772	0.0728816	-0.241509	-1.72096	-1.26192	-1.38527	0.100092	0.722359	-0.774165	-1.13045	-0.154136	0.586402	0.586402	1.43819	0.0088492	0.209439	-1.07095	-1.5166	-0.844414	0.447453	-0.404862	-1.34361	-1.15948	-0.180893	-0.622705	-0.511235	1.47551	-0.436783	-1.6696	-1.13379	-1.91215	-0.235259	-1.23182	-0.265129
GS1	GS	0.579209	0.957552	0.182654	-0.641743	1.62638	0.188597	-0.487867	0.651823	0.466061	0.370533	0.198105	0.671199	-0.990942	-0.433707	-1.35058	0.0847805	0.0332466	-1.41596	-0.9115	-1.22187	-0.0265395	0.941774	-0.562444	-1.13239	-0.149106	0.845942	0.845942	1.66398	0.362283	0.451178	-1.13261	-1.26427	-0.768342	0.742259	-0.273998	-1.42022	-0.816389	0.183303	-0.956327	-0.428352	1.20789	-0.35833	-2.03474	-1.16074	-1.69184	-0.287975	-1.06704	-0.236231
GS2	GS	-0.235361	0.598191	0.365296	-1.20837	1.45619	-0.377778	-0.897496	0.781439	0.109512	0.219718	0.205619	0.463421	-1.24148	-0.529408	-1.51347	0.492775	-0.0274667	-1.26128	-1.31971	-1.4046	0.245011	0.924571	-0.565595	-1.22528	0.239394	0.773198	0.773198	1.62875	0.333627	0.163622	-1.05388	-1.5168	-0.77439	0.542711	-0.206825	-1.38885	-1.02466	0.0421408	-0.379844	-0.433657	1.61211	-0.381071	-1.23562	-1.02017	-1.92618	-0.0808808	-1.47974	-0.567455
GS3	GS	0.206875	0.758987	0.262819	-1.00902	1.4455	-0.0317317	-0.909477	0.729176	0.191939	0.36509	0.20417	0.372736	-1.04731	-0.492709	-1.44413	0.385031	0.0108436	-1.24305	-1.19519	-1.15816	0.218375	0.900779	-0.592838	-1.01129	0.22403	0.831247	0.831247	1.66114	0.512409	0.181992	-1.09469	-1.3234	-0.89154	0.695151	-0.188118	-1.47153	-0.789993	0.320917	-0.756246	-0.136465	1.58014	-0.395152	-1.5454	-1.03291	-1.68173	-0.110768	-1.17415	-0.483172
GS4	GS	0.407041	0.927516	0.165324	-0.698368	1.5659	0.162669	-0.656572	0.504972	0.40081	0.233963	0.0917991	0.640517	-1.10807	-0.503611	-1.41656	0.00518625	-0.0496606	-1.43217	-0.992575	-1.15849	-0.118456	0.843743	-0.657036	-1.2998	-0.198111	0.789327	0.789327	1.56997	0.288307	0.040527	-1.17421	-1.29177	-0.869156	0.718083	-0.309725	-1.47168	-0.870394	0.148462	-0.962514	-0.413958	1.15416	-0.374899	-1.94009	-1.18058	-1.71558	-0.306944	-1.09301	-0.324568
GS5	GS	0.751378	0.987589	0.199984	-0.585119	1.68686	0.214525	-0.319162	0.798674	0.531313	0.507102	0.30441	0.70188	-0.873815	-0.363803	-1.2846	0.164375	0.116154	-1.39976	-0.830425	-1.28525	0.0653768	1.03981	-0.467851	-0.964986	-0.100102	0.902558	0.902558	1.758	0.436259	0.861828	-1.09101	-1.23676	-0.667528	0.766435	-0.238271	-1.36876	-0.762383	0.218144	-0.950139	-0.442747	1.26161	-0.341761	-2.12938	-1.1409	-1.6681	-0.269006	-1.04108	-0.147894
GS6	GS	0.649111	0.919784	0.160342	-0.809674	1.43481	0.314315	-0.921458	0.676912	0.274365	0.510463	0.202721	0.282051	-0.853144	-0.456011	-1.37479	0.277287	0.0491538	-1.22483	-1.07066	-0.911719	0.19174	0.876987	-0.620081	-0.797293	0.208666	0.889297	0.889297	1.69354	0.691191	0.200362	-1.1355	-1.12999	-1.00869	0.847591	-0.16941	-1.5542	-0.555326	0.599693	-1.13265	0.160726	1.54818	-0.409233	-1.85518	-1.04566	-1.43729	-0.140656	-0.86856	-0.398888
GSF1	GSF	0.748674	1.93115	0.238731	-2.27627	2.89367	0.279531	-1.54557	0.511373	0.287171	0.88977	-0.243887	0.420537	-1.80897	-1.1666	-2.93881	-0.842143	-0.259396	-2.93888	-2.09403	-2.2943	-0.57185	0.833799	-2.16034	-1.31487	-1.46907	1.28842	1.28842	2.57443	0.23357	1.08037	-2.64477	-3.31392	-1.89439	1.19821	-0.575319	-3.13208	-2.22242	-1.38347	-1.88145	-1.01626	2.63925	-0.745783	-3.79468	-2.33471	-3.92931	-0.58914	-2.46387	-0.571097
GSF2	GSF	0.454472	0.821661	0.096913	-1.38082	1.57104	-0.0315086	-0.798439	0.259849	0.123981	0.166198	-0.156448	0.384507	-1.27467	-0.585266	-1.465	-0.489568	-0.327977	-1.59794	-1.02711	-1.44969	-0.463749	0.465561	-1.04346	-1.69442	-0.813131	0.468551	0.468551	1.14258	0.165306	0.418662	-1.3065	-1.78088	-0.89709	0.479466	-0.525449	-1.6327	-1.34699	-0.867241	-0.899754	-1.01136	0.7748	-0.411085	-1.69032	-1.36953	-2.25042	-0.382326	-1.58397	-0.378595
GSF3	GSF	0.590512	1.32564	0.157511	-1.99387	2.30104	-0.0116901	-1.17962	0.379948	0.17115	0.324215	-0.220295	0.505474	-1.75064	-0.854706	-2.16059	-0.698169	-0.42411	-2.32912	-1.55028	-2.0342	-0.587799	0.707065	-1.54639	-2.11287	-1.1986	0.799636	0.799636	1.7745	0.234392	0.685521	-1.94459	-2.62672	-1.36268	0.759305	-0.686035	-2.39368	-1.93081	-1.2453	-1.39467	-1.31047	1.40349	-0.589546	-2.64001	-1.96752	-3.22734	-0.506104	-2.28589	-0.568955
GSF4	GSF	0.0222196	1.48772	0.103241	-2.55738	2.96748	-0.199562	-1.75488	0.503532	0.190038	0.139931	-0.499107	-0.257727	-2.56425	-1.21515	-3.15052	-0.854013	-0.668821	-3.31388	-2.27649	-2.90419	-0.898238	0.801998	-2.21056	-2.96675	-1.40665	0.933752	0.933752	2.38167	0.00171059	-0.121594	-2.4364	-3.21226	-1.86085	0.883742	-1.0731	-2.93366	-2.78615	-1.50191	-1.60357	-2.04114	1.66422	-0.767924	-3.28684	-2.62435	-4.25455	-0.768223	-2.74907	-1.08643
GSF5	GSF	-0.410953	0.687363	0.0276278	-1.15527	1.41774	-0.146753	-0.935143	0.264984	0.0873576	-0.00496707	-0.321359	-0.620933	-1.26828	-0.608582	-1.66422	-0.343145	-0.319545	-1.69464	-1.22808	-1.43321	-0.413189	0.357737	-1.14581	-1.25102	-0.572221	0.486501	0.486501	1.26039	-0.142295	-0.518956	-1.1086	-1.41009	-0.942456	0.425576	-0.526348	-1.27965	-1.41787	-0.613365	-0.682514	-1.00848	0.910716	-0.335539	-1.57522	-1.23351	-1.98283	-0.364597	-1.1438	-0.686531
GSF6	GSF	0.726552	1.82962	0.21811	-2.60691	3.03104	0.00812843	-1.56081	0.500047	0.218319	0.482233	-0.284142	0.626442	-2.22662	-1.12415	-2.85618	-0.90677	-0.520243	-3.0603	-2.07345	-2.61871	-0.711849	0.948569	-2.04933	-2.53132	-1.58408	1.13072	1.13072	2.40643	0.303478	0.95238	-2.58267	-3.47255	-1.82827	1.03914	-0.846621	-3.15465	-2.51464	-1.62336	-1.88958	-1.60958	2.03218	-0.768008	-3.5897	-2.56551	-4.20426	-0.629882	-2.9878	-0.759314
PBQC1	PBQC	19.6422	15.8241	21.2995	18.8674	15.5037	23.1663	19.0452	15.5251	20.0467	18.7666	19.1516	18.2943	19.2974	13.6146	16.4439	13.2167	15.6609	20.4894	17.9151	17.9805	15.8632	13.9507	12.5656	14.6061	18.0727	20.6682	15.6863	14.5367	17.7922	21.0647	21.0647	23.4587	19.4403	20.3152	14.2758	14.3429	12.2577	20.675	17.3511	13.4006	15.7277	19.3661	15.8469	17.6487	22.816	17.0744	14.3709	14.8165
PBQC2	PBQC	19.2642	15.8608	21.3218	19.0162	15.6984	23.1518	19.166	15.4317	20.0673	19.1016	18.9221	18.324	19.2376	14.0331	16.506	13.3806	16.0225	20.5524	18.1511	18.056	15.8627	14.0812	14.0641	14.9516	18.1277	20.6726	15.686	14.5937	18.072	21.1297	21.1297	23.5781	19.4705	20.3191	14.3727	14.3237	14.2855	20.7492	17.4261	13.4555	15.8309	19.4776	15.7621	18.0303	22.9068	17.1189	14.2267	14.757
PBQC3	PBQC	19.1785	15.5665	21.0664	18.836	15.4357	22.8957	18.37	14.9687	19.7918	19.3086	18.6514	18.0406	19.0248	13.8558	16.2715	13.1957	15.6432	20.2617	18.644	17.746	14.7137	13.6396	14.5613	14.5986	18.5935	20.382	15.3924	14.0576	18.1124	20.8695	20.8695	23.2779	19.1652	20.0214	13.9894	13.9709	14.6734	20.3508	17.1009	13.2715	15.3356	18.6764	15.2815	17.5612	22.7253	16.7817	13.6876	14.3904
PBQC4	PBQC	19.2466	15.4139	20.9953	18.3959	15.292	22.7451	18.4597	15.25	19.6499	18.9785	18.5202	17.9051	18.9119	13.8047	16.1444	13.0686	15.6676	20.0974	18.2926	17.6129	14.7856	13.6022	14.5098	14.2892	18.3687	20.279	15.274	13.953	17.7201	20.7257	20.7257	23.1836	19.0636	19.9386	13.9282	13.851	14.7232	20.2268	16.9614	12.9956	15.4506	18.7109	15.1002	17.628	22.5014	16.6848	13.4522	14.2627
PBQC5	PBQC	19.1268	15.4372	21.1884	18.4443	15.3164	22.852	18.4454	15.1296	19.7182	19.1966	19.1782	18.0162	19.0498	14.1971	16.2749	13.2757	15.6931	20.2336	18.4474	17.7412	14.9842	13.6808	15.1746	14.6777	18.1336	20.3493	15.3405	13.9081	17.9586	20.7998	20.7998	23.1797	19.1343	20.0507	14.1027	13.8442	15.2377	20.4113	17.1111	13.3566	15.5672	18.5747	15.038	17.7832	22.6911	16.7745	13.4675	14.4226
PBQC6	PBQC	19.2892	15.455	20.5716	18.2334	14.9148	22.8099	17.5449	15.113	19.644	18.5318	18.3868	17.9185	18.7461	14.0524	16.1324	13.1863	15.7055	20.0131	18.6423	17.5535	14.8681	13.5468	13.462	12.571	18.9891	20.2246	15.2578	14.1281	17.8023	20.4039	20.4039	22.6479	19.0448	19.7993	13.9604	13.3526	15.138	19.8498	16.7368	13.1162	14.9982	16.9331	14.55	15.8847	22.0051	16.6943	13.3319	14.4061
PBQC7	PBQC	19.0296	15.3703	20.3486	18.3398	14.819	22.7558	18.3647	15.0736	19.579	18.6557	18.4735	17.8197	18.7855	14.0792	16.1496	13.1149	15.9056	20.0637	18.3931	17.5475	14.9865	13.4939	14.2133	13.5649	19.2404	20.2514	15.2812	14.3802	17.8585	20.621	20.621	23.0468	19.0113	19.8965	13.9997	13.5786	15.288	20.1168	16.8776	13.4506	15.0382	18.3612	14.5081	17.221	22.2498	16.7191	13.3821	14.3357
[truncated: 57 more columns]

## Sheet: Table S3
Supplementary Table S3. m/z_RT features detected using LC-ESI-QqTOF-MS analyses in positive ionization mode in roots of two barley genotypes (cv. Vlamingh and cv. Gairdner) under four treatments. GC- control roots in cv. Gairdner, GCF- inoculated roots of cv. Gairdner undert control conditions, GS- salt treated roots of cv. Gairdner, GSF- inoculated roots of cv. Gairdner under saline conditions, …
	GC1	GC2-	GC3-	GC4	GC5-	GC6	GCF1	GCF2-	GCF3	GCF4-	GCF5-	GCF6	GS1	GS2-	GS3-	GS4-	GS5	GS6	GSF1-	GSF2--	GSF3	GSF4	GSF5-	GSF6	VC1	VC2	VC3	VC4	VC5	VC6	VCF1	VCF2-	VCF3	VCF4-	VCF5	VCF6	VS1-	VS2-	VS3	VS4-	VS5	VS6-	VSF1	VSF2	VSF3	VSF4	VSF5	VSF6-
m/z_rt	GC	GC	GC	GC	GC	GC	GCF	GCF	GCF	GCF	GCF	GCF	GS	GS	GS	GS	GS	GS	GSF	GSF	GSF	GSF	GSF	GSF	VC	VC	VC	VC	VC	VC	VCF	VCF	VCF	VCF	VCF	VCF	VS	VS	VS	VS	VS	VS	VSF	VSF	VSF	VSF	VSF	VSF
526.35913-1.374	6.96702e+06	1.12039e+07	1.07395e+07	9.02468e+06	1.07319e+07	3.26755e+06	9.70262e+06	1.76056e+07	1.07437e+07	1.05977e+07	8.71618e+06	6.59552e+06	3.08588e+06	8.39527e+06	1.313e+07	8.96332e+06	8.89822e+06	7.90899e+06	1.04328e+07	9.75783e+06	4389120	6.00366e+06	1.00502e+07	1.16976e+07	1.17381e+07	1.30592e+07	1.37198e+07	1.43803e+07	1.10775e+07	9.09588e+06	1.42272e+07	1.18207e+07	8.72651e+06	7.6535e+06	4.89986e+06	1.10765e+07	7.68826e+06	1.5291e+07	3.60889e+06	1.47786e+07	1.391e+07	9.95826e+06	8.38778e+06	1.28587e+07	1.44356e+07	6.47571e+06	1.18817e+07	5.14832e+06
482.41888-5.342	1.47324e+06	917787	1.51316e+06	1.87944e+06	1.65676e+06	784292	1435173	1.61913e+06	868885	1.24216e+06	1.1109e+06	1.00724e+06	813333	891149	1.80677e+06	1.54016e+06	3.18053e+06	1.06598e+06	2.25517e+06	802056	743842	1.23943e+06	958557	1.50359e+06	2.08961e+06	2.0835e+06	2.08045e+06	2.07739e+06	2.09267e+06	2.10183e+06	1.32945e+06	946967	1.07351e+06	1.04972e+06	1.21407e+06	2019225	740928	1.28496e+06	1.13635e+06	2.70349e+06	1.88559e+06	885893	1.78491e+06	6.64474e+06	2.68914e+06	1.43679e+06	1.41237e+06	5.09853e+06
468.41547-10.896	3.62545e+08	363517440	3.70713e+08	3.75101e+08	4.65303e+08	3.31719e+08	346103472	3.9416e+08	3.68232e+08	3.36866e+08	264882400	2.21589e+08	3.1249e+08	3.58344e+08	4.37039e+08	3.65058e+08	4.15036e+08	4.03741e+08	5.0718e+08	3.43123e+08	289398432	2.68405e+08	3.74685e+08	3.37243e+08	5.10639e+08	5.38129e+08	5.51873e+08	5.65618e+08	4.96895e+08	4.55661e+08	5.26016e+08	349029206	4.7895e+08	4.04495e+08	5.47569e+08	4.83185e+08	2.54761e+08	5.89514e+08	471609416	6.98618e+08	3.72251e+08	302884487	6.71908e+08	4.7839e+08	1014289388	5.78034e+08	505910940	6.77856e+08
454.38931-3.859	1.39284e+06	1.74454e+06	1.52807e+06	1.93774e+06	1.88837e+06	2.05001e+06	2567466	1.31956e+06	1.50303e+06	2.31598e+06	1.23072e+06	1.12897e+06	1395050	1918510	952226	1.56317e+06	970869	689099	1.62541e+06	1.75141e+06	519314	1.20946e+06	1.51623e+06	1.64714e+06	1.83674e+06	1.72166e+06	1.66411e+06	1.60657e+06	1.89428e+06	2.06691e+06	1.53659e+06	1.74979e+06	1.70735e+06	979437	2920120	2.07628e+06	726567	2.22341e+06	3.27794e+06	1.79421e+06	1.97529e+06	1.00047e+06	3.43907e+06	7216244	4.58971e+06	1.81732e+06	1.45578e+06	2.87058e+06
440.40927-9.044	6.01537e+08	670809600	6.20873e+08	6.8303e+08	6.54464e+08	6.15858e+08	616794624	6.08315e+08	6.98809e+08	5.89161e+08	4.34164e+08	4.04102e+08	5.45266e+08	7.27738e+08	6.54235e+08	707215200	7.57526e+08	5.55333e+08	9.26611e+08	7.41031e+08	542073600	5.0503e+08	5.39843e+08	6.54329e+08	8.18745e+08	824017298	8.26653e+08	8.2929e+08	8.16109e+08	8.08201e+08	7.3262e+08	730734997	722779200	6.76609e+08	9.54871e+08	7.66052e+08	4.70123e+08	9.54672e+08	9.46496e+08	7.7238e+08	7.08322e+08	5.99486e+08	1418858021	7.59783e+08	2178242624	8.27904e+08	729542820	1177181611
426.34143-1.616	283950	978281	685732	1.21629e+06	292354	669732	555073	290997	490982	285518	378749	346608	681188	487785	537537	288843	562797	507253	361043	993250	768680	456575	1.15225e+06	1.19582e+06	902699	1.07114e+06	1.15536e+06	1239580	818479	565819	318367	1.05766e+06	332875	1.1124e+06	312555	303508	386349	1.10202e+06	1.18701e+06	303660	312048	738435	1.63731e+06	6.37688e+06	2.64737e+06	1.09532e+06	722440	619493
372.27493-2.314	3.09447e+06	1.66586e+06	1.35043e+06	1.49375e+06	1.14643e+06	1.29754e+06	1.46947e+07	1.45192e+06	1.23927e+06	1.75934e+06	1.05875e+06	1.7543e+06	1.71447e+06	1.37409e+06	3.03101e+06	1.24295e+06	1.36208e+06	1.11646e+06	1.30664e+06	4.65918e+06	5315358	1.25033e+06	1.06243e+07	1.97817e+06	2.27293e+06	2.90217e+06	3.21678e+06	3531400	1.95832e+06	1.01446e+06	1.98201e+06	2.33045e+06	1454940	1.30209e+06	5018880	1.13188e+06	809022	2.76824e+06	724695	1.57213e+06	1.20556e+06	2.07627e+06	11197879	6.98217e+06	2.17299e+07	2.07357e+06	1.87678e+06	1.04516e+06
614.58484-21.324	570021	508059	1.19521e+06	866329	987627	543824	398773	1.03825e+06	1.03776e+06	852243	467479	587881	830730	976081	738374	830036	912784	418994	1.03452e+06	877124	747261	840722	1.28772e+06	854463	783982	825154	845739	866325	763397	701640	519473	673384	851683	595409	470725	802878	700172	727486	703485	649817	1.06718e+06	724405	1.04979e+06	6.21287e+06	1.59345e+06	1.15562e+06	1.07423e+06	969145
714.69537-22.737	188240	747474	420937	635496	978215	292707	423056	724671	889338	1.30158e+06	755477	224891	371849	356806	185131	299072	475955	292287	457312	724435	61821	378191	760226	444819	412374	477484	510039	542595	379818	282153	1.16823e+06	454599	529796	981168	518947	1.20029e+06	625489	1.3748e+06	409305	1.34161e+06	903867	348518	1.2737e+06	5.91045e+06	2.22248e+06	475595	295024	1.51867e+06
718.6106-17.981	366456	395829	450053	476540	645188	338516	377228	476817	508281	582653	389231	321898	519270	912512	530878	578919	620303	500606	952158	494507	342619	704710	514972	669423	433457	422532	417069	411606	438920	455308	405309	446734	601332	425734	374164	546666	309905	564812	257859	441718	794859	380632	608038	6.05534e+06	919332	703163	566004	590939
726.58582-12.064	459045	515145	359721	440458	629692	329034	264973	686475	519322	501688	330006	331077	331656	682581	399772	665574	596203	346123	540568	659749	261348	627368	263240	556264	542729	526475	518347	510220	550857	575239	551739	512140	645284	429703	394186	360214	495438	589586	752394	481569	546766	701791	1.00081e+06	6.00272e+06	1.53787e+06	726252	771292	937098
638.51984-21.686	397259	700336	600948	362433	587241	240173	618045	483242	381176	459905	539369	256915	183294	258055	603366	352201	539432	429827	469018	532342	227354	567175	413231	673144	929157	990280	1.02084e+06	1.0514e+06	898595	806910	809862	683101	377917	645542	792107	301974	227617	818889	674244	989443	503853	506894	805377	5.87421e+06	1.36902e+06	439349	507019	455575
640.59344-22.49	92369.9	364824	87791.8	117582	153992	69101	90275.2	94788.4	64545	83848.4	102126	62823.4	66328.9	44167.3	101139	69501.8	92294.1	67356.9	690355	100533	75753	49273.9	96870.1	72961.8	125068	126537	127271	128005	124334	122131	78360.9	92580.6	130480	125791	113095	94077.6	67043	122123	117845	107424	169589	129392	372612	5.58925e+06	651442	103163	69103.1	158944
610.56433-10.162	831412	977018	989056	1.0432e+06	800889	1.05502e+06	788739	823526	715743	1.00141e+06	751521	611239	654263	1.06707e+06	1.00135e+06	1186225	1.53794e+06	676508	1.46514e+06	1.79113e+06	648586	806769	1.04507e+06	794802	1.07968e+06	1.20261e+06	1.26407e+06	1.32553e+06	1.01822e+06	833838	1.05632e+06	774319	1.3063e+06	1.25926e+06	1.18966e+06	1.23423e+06	769377	1.69533e+06	1.35794e+06	933179	931097	856837	2.37013e+06	6.27677e+06	3.89461e+06	1.54717e+06	792225	1.28614e+06
612.48218-9.115	225257	522141	309882	754962	190045	220214	288901	579270	300643	446684	212794	151682	214182	287920	232279	240264	285551	568491	541853	144210	179204	164337	286854	569699	304565	360941	389130	417318	276376	191811	237534	507026	365748	337334	339032	563364	251172	722896	198729	357799	308781	253659	515088	5.84044e+06	786305	385044	484864	713646
608.52209-8.724	198393	129255	103736	65469.8	112321	70480.5	64835.2	98366	97676.4	55435.6	53471.3	22998.6	120794	118502	119857	92225.9	116928	36965.7	191168	77696.7	82174.5	108112	62388.1	45398.9	157312	197801	218045	238290	137067	76333.2	92572.3	376806	735540	740882	368221	705172	388228	401820	193599	243800	797570	433251	700470	6.01091e+06	1.09953e+06	624708	779745	168621
614.57031-12.487	1.86076e+06	2039148	1.69681e+06	2.16561e+06	2.466e+06	1.74599e+06	1943340	2.10681e+06	2.23754e+06	2.13411e+06	1.38652e+06	1.64488e+06	2.78106e+06	2.50977e+06	2.00826e+06	1.70719e+06	1.23123e+06	1.95719e+06	1.95385e+06	1.3831e+06	2553135	1.45661e+06	2.21337e+06	1.47547e+06	1.52402e+06	1.60718e+06	1.64876e+06	1.69034e+06	1.48244e+06	1.3577e+06	1.51101e+06	1.8818e+06	2.42164e+06	1.62785e+06	1.65672e+06	1.3569e+06	1.18347e+06	1.28729e+06	1.89356e+06	1.55436e+06	1.27721e+06	1.5077e+06	3.14684e+06	7.07652e+06	4.70796e+06	2.39383e+06	3.42379e+06	1.86106e+06
608.47131-5.519	392409	327045	384502	175324	320665	185319	370305	381855	313356	237734	264975	215010	344739	180316	369356	343029	445247	260613	486224	201749	371376	313778	292040	333912	359936	348674	343043	337412	365567	382461	302673	469962	412091	234706	479337	424064	401540	331215	565202	679628	439488	251538	963549	5.73653e+06	1.397e+06	427362	775559	493199
624.51776-10.471	457501	1.22236e+06	790175	941691	690648	537944	939616	1.00499e+06	910685	621988	696752	722525	968136	1.12029e+06	984986	737941	530870	855026	1.09338e+06	808762	876388	1.11883e+06	771904	1.11737e+06	793052	883920	929353	974787	747618	611317	769678	688384	828365	845274	623343	601686	697414	705847	634854	890735	601378	779077	1.47117e+06	6.55001e+06	2.37775e+06	984173	1.29555e+06	700470
628.55237-11.509	291184	348707	304195	374179	587346	380573	282765	134335	448913	390721	308503	234273	453591	614795	578059	435830	443010	340404	504284	355051	301018	413608	116934	352916	334751	315609	306038	296467	344322	373034	304470	196661	516274	284449	332398	342869	215773	423241	302869	376686	565723	207810	578251	5.97368e+06	906556	477510	412544	342050
636.49298-11.631	381611	367156	410219	395146	406657	256150	391105	385731	450980	329784	270286	297079	416575	185909	488648	414118	560634	354118	491921	263598	532036	331253	410328	346171	342038	329139	322690	316240	348488	367836	553443	463723	441281	441699	483396	497696	414004	363078	522140	564450	425549	355451	848677	5.9122e+06	1.26771e+06	638260	990660	445089
632.52429-12.616	237753	601837	706438	1.35641e+06	445664	375904	490689	474143	238721	225313	182073	147045	218112	381577	208344	392625	286280	250422	262079	266395	304866	205799	293485	193900	318196	316769	316056	315343	318909	321048	697557	214575	210272	196569	158962	183617	176356	142326	181268	181347	155710	194003	332507	5.66616e+06	477169	1.31908e+06	1.01325e+06	200176
634.53961-13.714	347054	403695	363718	551818	442215	313558	318054	418413	435145	388187	258541	234992	573928	526468	485491	480159	450486	360494	372407	275426	724154	300842	425794	314538	305217	283181	272162	261144	316236	349291	313269	407458	372162	293506	384866	413977	282944	262807	445780	440489	323212	355401	656511	5.86601e+06	953211	480505	734352	425848
638.55121-13.656	2.49775e+06	2.76171e+06	1.11007e+06	2.0202e+06	2.16463e+06	1.44161e+06	1.42366e+06	1.4624e+06	1.83605e+06	1.64358e+06	1.49962e+06	960293	1.3984e+06	2.38793e+06	1.8014e+06	2.45157e+06	2.65466e+06	2.86862e+06	2.1396e+06	1.56296e+06	1.40988e+06	2.57788e+06	1.62411e+06	1538400	2.7834e+06	2.35534e+06	2.14131e+06	1.92728e+06	2.99743e+06	3.63953e+06	3.34651e+06	1.84965e+06	2.12682e+06	1.59859e+06	2.36052e+06	2.54625e+06	1.93451e+06	4.83022e+06	1.48792e+06	4.14916e+06	2.97077e+06	1.06512e+06	3.98736e+06	7.67888e+06	6.01748e+06	2.59823e+06	2.56155e+06	4.55899e+06
640.61969-16.393	0	16350.9	0	16149.4	7.25565e+07	5.91599e+07	62492544	5.47434e+07	6.46578e+07	9.92485e+07	5.4905e+07	3.61377e+07	4.89671e+07	9.79774e+07	8.82092e+07	7.10152e+07	7.555e+07	8.38512e+07	1.7175e+08	1.02736e+08	54217302	7.09775e+07	6.73091e+07	7.41202e+07	4.04654e+07	6.06982e+07	7.08145e+07	8.09309e+07	3.03491e+07	0	6.98345e+07	4.73485e+07	3.49666e+07	2.22973e+07	7.22767e+07	4.55609e+07	4.06583e+07	111649400	6.80475e+07	5.11202e+07	5.74046e+07	5.49389e+07	1.13607e+08	3.17486e+07	1.65168e+08	6.37327e+07	74054805	1.03004e+08
642.59857-19.513	360358	679527	605638	866209	517880	454860	572122	472113	463006	469062	431649	384071	661573	815804	736160	613601	744692	616523	706166	433046	599289	545070	664651	446093	546089	529844	521721	513598	554212	578581	524661	722734	627827	351368	606865	606017	362594	450152	449587	607000	504277	542809	845710	5.97792e+06	1.23704e+06	729387	839657	486956
650.53284-10.523	748023	1118982	522843	734023	754659	384741	644440	1.00367e+06	1.12321e+06	482393	467668	642678	872698	1.41652e+06	527457	856504	648113	992292	738378	583084	2.73377e+06	449800	993590	661137	571245	482950	438802	394655	615392	747835	889537	1.37322e+06	838823	627823	541017	473356	593985	426270	844885	913418	523194	745709	1.44325e+06	6.02645e+06	2.14253e+06	1.36619e+06	3.15222e+06	1.16593e+06
648.52234-9.473	1.68543e+06	1811778	2.04039e+06	1.17387e+06	2.28915e+06	1.42498e+06	693780	1.49574e+06	2.38033e+06	2.59085e+06	828072	1.36164e+06	2.91902e+06	3.38272e+06	2.97636e+06	1.76504e+06	3.02366e+06	1.14773e+06	3.83024e+06	1.4747e+06	1.89375e+06	2.65029e+06	1.41791e+06	1.9667e+06	1.53486e+06	1.23043e+06	1.07821e+06	925988	1.68708e+06	2.14374e+06	1.77769e+06	1.72273e+06	3.78653e+06	2.10752e+06	2.07089e+06	3.89125e+06	1.21004e+06	1.50558e+06	279784	2.1271e+06	8.64019e+06	1.40235e+06	1.98367e+06	8.127e+06	3.12966e+06	2.67992e+06	1.68108e+06	2.50331e+06
666.63562-18.105	2.01647e+06	2.29803e+06	1.93969e+06	1.34914e+06	3.02704e+06	1.25048e+06	1.3882e+06	1.6475e+06	2.15964e+06	1.97892e+06	1.38811e+06	1.45115e+06	3.13243e+06	3.88147e+06	2.93027e+06	2.69403e+06	2.04859e+06	1.08733e+06	3.91642e+06	1.46811e+06	1.56996e+06	8.08225e+06	1.68815e+06	3.19259e+06	1.56954e+06	1.41153e+06	1.33253e+06	1.25353e+06	1.64855e+06	1.88556e+06	1.25367e+06	1.82399e+06	3.07114e+06	1.99126e+06	1.52112e+06	2.70001e+06	1.3883e+06	2.47786e+06	869669	2.23935e+06	6.29849e+06	1.23101e+06	3.1233e+06	8.39685e+06	5.19282e+06	2.97129e+06	3.01497e+06	2.99681e+06
698.6817-21.198	738548	881590	674948	790728	628116	516011	954087	915474	881307	669350	1.0674e+06	781193	1.46097e+06	1.0205e+06	1.15064e+06	750321	585378	1.13734e+06	1.04272e+06	729972	1.41516e+06	784870	1.16364e+06	965273	984655	1.04339e+06	1.07276e+06	1.10213e+06	955286	867181	1.24977e+06	1.13123e+06	1.14998e+06	1.40044e+06	1.36405e+06	1.09178e+06	1.26549e+06	806665	1.03588e+06	1.3364e+06	1.08286e+06	1107150	2.84921e+06	7.25548e+06	4.57919e+06	1.64325e+06	2.45668e+06	914730
694.62701-19.891	1.29163e+06	1.84501e+06	1.02678e+06	2.49693e+06	1.44466e+06	968531	644751	2.16816e+06	1.65352e+06	1790850	605306	698141	1.98348e+06	3.32447e+06	801662	771239	531579	1.62586e+06	1.42274e+06	1.24813e+06	4.32171e+06	503003	2.29938e+06	815463	1.15357e+06	1.25065e+06	1.29919e+06	1.34773e+06	1.10503e+06	959404	808897	852696	721759	479115	978324	664960	711836	863859	1.36688e+06	1.69797e+06	1.0743e+06	612351	1.91108e+06	6.79283e+06	3.10685e+06	859612	2.07142e+06	682559
692.61566-18.782	558256	571372	449583	788566	545067	430483	528118	678267	750720	574620	466659	499952	1.14995e+06	1.15823e+06	796302	793208	535370	784328	713566	520737	898858	382663	668639	542862	507519	543548	561562	579576	489505	435462	658821	670884	630448	398903	453016	468456	552291	357256	590337	838529	549489	493542	1.18135e+06	6.04251e+06	1.81094e+06	736965	1.51815e+06	491734
688.57794-15.589	456187	496762	389024	661326	880441	706964	589150	793793	635763	743706	350343	410555	629881	872477	710278	1.03723e+06	666807	610387	861852	500998	421698	460338	581844	767145	779365	738230	717663	697095	799933	861635	801939	678889	885154	661818	447159	907592	367069	688847	495597	796474	920120	486394	1.01998e+06	6.09273e+06	1.59731e+06	739007	725532	880226
726.69214-21.63	798310	799479	931832	842322	982716	400529	732116	1.17767e+06	792780	745083	492209	898818	1.16538e+06	1.61364e+06	990302	1.0961e+06	793301	320090	1.88776e+06	866160	721194	1.0035e+06	898614	1.31304e+06	976611	986995	992188	997380	971419	955842	719441	1.12209e+06	1.38152e+06	1.24134e+06	757326	1332675	2.08881e+06	1.64393e+06	1.02887e+06	1.24079e+06	2.05962e+06	1.65293e+06	3.72301e+06	7.19092e+06	6.0012e+06	1.94799e+06	2.5272e+06	1.59944e+06
724.64105-21.255	769271	1.45294e+06	732081	716102	750670	510860	566429	1.42946e+06	455088	983318	615643	496570	780117	1.34801e+06	850692	1.01679e+06	1.08117e+06	641428	468855	1.06576e+06	467549	398956	637966	1.13416e+06	1.15461e+06	1.29168e+06	1.36022e+06	1.42875e+06	1.08607e+06	880457	1.47013e+06	1.16036e+06	928463	1.33018e+06	913418	1.09805e+06	753705	859195	769599	1.28044e+06	1.16194e+06	1.04464e+06	2.0825e+06	6.3333e+06	3.16683e+06	1.45769e+06	1.22222e+06	1.55236e+06
718.6272-18.714	431628	490650	286612	392988	707749	442672	258782	429358	372400	546121	372753	245572	441434	740109	648611	510747	470985	445912	479219	384972	236133	456466	351294	415113	427694	358186	323431	288677	462448	566710	244588	434654	614846	409966	418354	502966	128878	670226	201576	587559	1.25394e+06	88163.5	625684	6.03148e+06	975741	544654	576461	552579
754.72766-22	899702	735884	1.22513e+06	657530	875670	453293	641238	1.41308e+06	958416	860897	606046	561778	813665	1024510	1.0353e+06	809470	830449	219203	1.73195e+06	473783	791368	496612	881730	1.05568e+06	1.2433e+06	1.3705e+06	1.43409e+06	1.49769e+06	1.17971e+06	988918	559953	1.25919e+06	1.62109e+06	1.19828e+06	744826	1.024e+06	2.60133e+06	1.31118e+06	1.66792e+06	1.54863e+06	1.39338e+06	1.7076e+06	3.40357e+06	6.75964e+06	5.208e+06	1.82376e+06	2.33515e+06	2.11872e+06
752.76562-21.339	1.07993e+06	1.38816e+06	1.31051e+06	1.71064e+06	1.22123e+06	759242	999734	1.44999e+06	1.59931e+06	1.09354e+06	1.35334e+06	1.12452e+06	1.52622e+06	3.03825e+06	1.77143e+06	1.03406e+06	1.33174e+06	5.91056e+06	2.27865e+06	2.14904e+06	1.7866e+06	1.81908e+06	2.64031e+06	1.42588e+06	1.2439e+06	1.24661e+06	1.24797e+06	1.24933e+06	1.24255e+06	1.23848e+06	1.94361e+06	1.40546e+06	1.78086e+06	1.60411e+06	1.5489e+06	700496	1.12501e+06	759009	2.19225e+06	1.78301e+06	1.31983e+06	1.28086e+06	2.77974e+06	7.09017e+06	3.18994e+06	4.17717e+06	9.62873e+06	2.21286e+06
742.69501-16.562	526732	547072	443437	518683	447649	443282	341359	378040	558124	692561	344002	226181	483706	745620	1.10472e+06	832232	585618	385447	348089	605572	409696	386410	667009	384556	626374	667483	688037	708592	605819	544155	473263	284634	796531	781783	755865	766344	580437	837357	758127	351227	918635	473105	1.17868e+06	6.02068e+06	2.00697e+06	1.12235e+06	938288	760600
812.54651-9.061	6.33269e+06	4.65748e+06	5.8309e+06	1.09719e+07	8.50846e+06	6.19466e+06	7222896	9.41467e+06	1.07981e+07	7.08018e+06	5.67633e+06	6.36163e+06	1.2711e+07	8.38403e+06	8.66968e+06	7.06933e+06	5.83578e+06	7.28737e+06	1.06842e+07	5.22875e+06	7.93099e+06	3.41512e+06	1.02826e+07	4.50828e+06	3.63264e+06	3.3178e+06	3.16039e+06	3.00297e+06	3.79006e+06	4.26232e+06	7.3359e+06	7.23618e+06	6796350	5.43006e+06	7.42401e+06	7.8057e+06	5.93973e+06	2.41161e+06	7.08312e+06	9.37486e+06	5.2466e+06	5.4578e+06	1.45164e+07	1.08589e+07	2.16578e+07	9.31694e+06	1.70974e+07	4.26908e+06
822.60309-11.817	900280	947753	989365	638574	2.10809e+06	1.99494e+06	1501896	1.07754e+06	1.43634e+06	1.25076e+06	1.07831e+06	884130	1.35692e+06	1350770	2.67603e+06	1.49361e+06	2.43519e+06	1.29946e+06	2.44926e+06	1.18603e+06	1327320	516335	720472	707311	814146	934335	994430	1.05452e+06	754052	573768	1.08656e+06	664009	1.21947e+06	1.19796e+06	1.21767e+06	1.00821e+06	499310	1.28922e+06	1.46527e+06	368853	1.03656e+06	716299	1.6633e+06	6.23175e+06	2.90786e+06	898770	1.0448e+06	1.11383e+06
482.32217-2.407	2.25928e+06	2.61838e+06	1.28752e+06	4.51822e+06	2.31236e+06	922501	1.11294e+06	4.24439e+06	4.0748e+06	1.8274e+06	2.59139e+06	2.3235e+06	2.88585e+06	4.08938e+06	3.58164e+06	4002225	5.34402e+06	3.95261e+06	4.89267e+06	3.80394e+06	1.88515e+06	3.12642e+06	2.40876e+06	3.76083e+06	2.72053e+06	1.9922e+06	1.62803e+06	1.26386e+06	3.0847e+06	4.1772e+06	4.23807e+06	4.74803e+06	5.49022e+06	3.70434e+06	4494890	3.95085e+06	2.69838e+06	2.14922e+06	3.23836e+06	2.57462e+06	3.68569e+06	4.02593e+06	6.43985e+06	9.90291e+06	9.17073e+06	5.33613e+06	8.72822e+06	7.29055e+06
480.30142-2.233	854508	864318	1.07077e+06	1.1029e+06	1.21055e+06	732004	806140	1.25589e+06	915983	852807	737210	671618	879489	1.16542e+06	971068	1.44079e+06	1.63059e+06	660250	1.2169e+06	1.47787e+06	900243	1.05045e+06	1.16718e+06	845076	1.02481e+06	943369	902647	861925	1.06554e+06	1.1877e+06	567343	892907	960165	421422	909455	443421	635702	650783	2.25388e+06	1.0442e+06	776533	447203	1.74023e+06	6.0495e+06	2.54825e+06	707174	1.20867e+06	730104
496.33945-3.03	3.71978e+07	4.24047e+07	4.29615e+07	3.83425e+07	4.76138e+07	4.6979e+07	24573606	2.13055e+07	2.17735e+07	4.47014e+07	3.59886e+07	1.40909e+07	3.81011e+07	5.6498e+07	5.09874e+07	4.08038e+07	5.84991e+07	4.65951e+07	4.26329e+07	6.10788e+07	36344724	3.26075e+07	2.3933e+07	3.64789e+07	2.88182e+07	3.46233e+07	3.75258e+07	4.04284e+07	2.59157e+07	1.72081e+07	4.77952e+07	5.47847e+07	5.64708e+07	9.39489e+07	3.79633e+07	5.66727e+07	4.00521e+07	1.46341e+08	4.96827e+07	2.829e+07	5.01617e+07	4.44214e+07	1.45144e+08	3.99164e+07	2.30504e+08	3.70207e+07	3.7764e+07	8.22776e+07
494.31744-2.177	1.14709e+06	1.05231e+06	426491	977796	1.13291e+06	1.09746e+06	378717	1.18624e+06	1.12401e+06	827307	621910	594049	584931	1096220	951544	954552	980668	1.01183e+06	1.26361e+06	982185	1.08936e+06	800621	800993	855523	791625	684777	631353	577929	845049	1.00532e+06	1.27382e+06	1.25642e+06	1.34783e+06	622852	836959	540156	455645	1.96589e+06	1.65377e+06	684141	1.14606e+06	1.07203e+06	2.14939e+06	6.85726e+06	2.85385e+06	2274840	3.44916e+06	1.84634e+06
510.39621-3.499	2.10074e+06	2.43084e+06	1.16065e+06	3.3463e+06	3.98035e+06	2.20361e+06	2.34055e+06	3.23102e+06	3.17044e+06	1.05062e+06	1.78416e+06	1.73978e+06	2.32413e+06	2.79129e+06	2.67945e+06	1.84398e+06	3.47618e+06	2.89004e+06	732356	2.84834e+06	2.41924e+06	757363	457954	3.28759e+06	2.68507e+06	2.68491e+06	2.68483e+06	2.68475e+06	2.68515e+06	2.6854e+06	3.26002e+06	3.06194e+06	1389345	2.52547e+06	1.09993e+06	2.76665e+06	1.63903e+06	3.59132e+06	841582	2.95522e+06	3.91052e+06	2.39004e+06	3.91742e+06	8.75234e+06	6.11557e+06	3.31062e+06	3.77199e+06	4.12312e+06
508.33368-2.499	337907	428378	347857	156791	336577	327091	298396	366308	399448	286696	240074	411379	1.09494e+06	389694	384646	332037	403349	149423	449044	338715	362986	327291	336263	351434	289320	233738	205947	178156	317111	400484	174489	1.29189e+06	1.45224e+06	687123	582435	363461	307818	445237	447817	408100	171625	361216	798295	5.95588e+06	1.17706e+06	2.06164e+06	688698	1.27385e+06
524.36737-4.655	1.26354e+06	1.46702e+06	1.53303e+06	1.99469e+06	749495	1.10483e+06	655468	1.414e+06	1.01224e+06	1.36429e+06	1.30716e+06	1.23576e+06	1.87185e+06	1.83478e+06	1.09481e+06	2.11745e+06	1.91647e+06	1.35125e+06	1.94031e+06	691457	1565739	1.40427e+06	1.47426e+06	1.80769e+06	996061	795455	695152	594849	1.09636e+06	1.39727e+06	1459824	1.23151e+06	1.99442e+06	1.45054e+06	878224	1.64903e+06	887347	1.5882e+06	1.22639e+06	1.73899e+06	3.76639e+06	1.22049e+06	2.54019e+06	7.82021e+06	3.90882e+06	2.37433e+06	2.0589e+06	1.19639e+06
544.43457-2.164	1.19763e+06	3976920	2.51802e+06	2.43936e+06	1.1979e+06	2.39197e+06	1961376	1.3901e+06	1.3882e+06	1.6619e+06	1.28213e+06	780905	1.0634e+06	1.21883e+06	1.78861e+06	1.55474e+06	3.98394e+06	1.44928e+06	1.89308e+06	1.70751e+06	1.13003e+06	1.69574e+06	3519000	3.58792e+06	2.2539e+06	2.48308e+06	2.59767e+06	2.71226e+06	2.13931e+06	1.79553e+06	1928850	2.63561e+06	3.81848e+06	1.99228e+06	2.2725e+06	3.29356e+06	1.31394e+06	3.36873e+06	1.6822e+06	2.2067e+06	3.08239e+06	1.36939e+06	4.23954e+06	7.14917e+06	6.54724e+06	1.33669e+06	1.4772e+06	2.65947e+06
542.31805-2.339	10385.1	4.01808e+06	1.54558e+06	2.01043e+06	2431650	4.42638e+06	5.33741e+06	5.48615e+06	2.27862e+06	2.44166e+06	1.88307e+06	3.63836e+06	5.28668e+06	1.0411e+07	2.79464e+06	5.60664e+06	1.9075e+06	8.45418e+06	8.76805e+06	6.64654e+06	6.38423e+06	3.60954e+06	5.20198e+06	1.52912e+06	9.32396e+06	8.36887e+06	7.89133e+06	7.41379e+06	9.8015e+06	1.12341e+07	6.98715e+06	5.61769e+06	8.2728e+06	4.37898e+06	5.4492e+06	5.93017e+06	4.85447e+06	6.04622e+06	8.48496e+06	7.20197e+06	5.62092e+06	3.73564e+06	11990397	1.40841e+07	1.67658e+07	6.11978e+06	7.87481e+06	3.83071e+06
518.32104-1.802	8.90918e+06	9.98441e+06	9.86046e+06	7.56858e+06	1.22184e+07	1.37716e+07	7.15736e+06	6.69447e+06	5.43893e+06	9.76124e+06	7613725	3.73911e+06	7.79983e+06	1.11583e+07	1.21989e+07	1.05968e+07	1.91637e+07	1.16199e+07	1.79559e+07	1.32313e+07	7319748	4.90268e+06	5.57019e+06	8.91584e+06	8.07704e+06	8.96173e+06	9.40407e+06	9.84641e+06	7.6347e+06	6.30768e+06	1.27584e+07	1.11485e+07	1.3213e+07	1.68836e+07	1.10635e+07	1.41098e+07	7.98746e+06	2.38343e+07	1.67139e+07	4.63827e+06	1.3033e+07	8.17927e+06	2.32489e+07	1.62731e+07	3.70957e+07	9.95142e+06	1.03367e+07	1.72827e+07
552.48029-7.754	1.00592e+06	1.11698e+06	858609	1.13944e+06	708610	529859	842042	1.4807e+06	848941	1.48469e+06	650256	534694	899701	813915	1.48789e+06	1.0271e+06	1.10973e+06	813527	670571	673996	961968	1.11057e+06	1.59008e+06	933026	809960	735797	698715	661634	847042	958287	1.26707e+06	1.26243e+06	865009	554970	625774	949720	672460	805907	1.10971e+06	1.02319e+06	1.06098e+06	1.07735e+06	1.68167e+06	6.2487e+06	2.71166e+06	976677	2.0294e+06	655428
550.38232-4.784	494063	571793	601343	778801	860461	379814	318794	368983	489554	571095	239908	418994	560761	638706	458107	748084	941415	527628	677519	381837	305093	475970	486153	454981	661935	601181	570804	540427	692312	783443	952504	572316	1.02267e+06	587854	927785	1.20338e+06	302297	666498	290365	865523	3.29559e+06	204023	991986	6.41378e+06	1.55476e+06	768702	883975	643933
546.39685-3.431	1.34014e+07	1.949e+07	1.87238e+07	1.98018e+07	1.34752e+07	1.19485e+07	17392029	1.42592e+07	1.38394e+07	16574400	7.19094e+06	9.18589e+06	1.17036e+07	1.41103e+07	1.55787e+07	8.08482e+06	2.01023e+07	1.20702e+07	1.49199e+07	1.05626e+07	13521102	8.57831e+06	1.88777e+07	1.53627e+07	1.78675e+07	1.96126e+07	2.04851e+07	2.13577e+07	1.6995e+07	1.43773e+07	1.56294e+07	1.39647e+07	1.83455e+07	8.28952e+06	1.00307e+07	1.62956e+07	9.97504e+06	1.46855e+07	2.28789e+07	1.71114e+07	1.5363e+07	1.14941e+07	2.3326e+07	2.2095e+07	3.48281e+07	1.2121e+07	1.97791e+07	1.8023e+07
544.36035-2.601	3.38739e+06	5.55747e+06	6.57232e+06	9.60714e+06	7.30735e+06	4.24906e+06	7404165	9.25543e+06	4.55423e+06	5.36248e+06	3.66522e+06	6.45489e+06	8.3689e+06	5.80333e+06	5.39412e+06	5.79764e+06	6.09898e+06	3.44948e+06	7.55273e+06	4.37032e+06	2.76488e+06	4.37594e+06	5.31478e+06	4.13003e+06	7.51446e+06	8.57792e+06	9.10965e+06	9.64138e+06	6.98273e+06	5.38754e+06	3.85519e+06	5.09059e+06	4.85449e+06	5.07347e+06	5.32812e+06	6.44261e+06	2.56779e+06	5.27675e+06	4.57499e+06	5.01745e+06	1.20845e+06	4.04598e+06	7.52975e+06	8.83304e+06	1.17581e+07	6.33571e+06	4.54113e+06	6.16861e+06
580.36072-4.855	1.63815e+06	3.74847e+06	3.80718e+06	3.98835e+06	4.13791e+06	2.9884e+06	3452865	3.50886e+06	3.56886e+06	3.2949e+06	2.5584e+06	1.96821e+06	3.15359e+06	3.67305e+06	3.43821e+06	3.61599e+06	4.33457e+06	3.45453e+06	4.35994e+06	2.8592e+06	3.19158e+06	2.81657e+06	2.87355e+06	3.29288e+06	2.82161e+06	3.47813e+06	3.80639e+06	4.13465e+06	2.49335e+06	1.50857e+06	4.0756e+06	3.4618e+06	4.02173e+06	1.62281e+06	1.85005e+06	1.55371e+06	2.57537e+06	3.93301e+06	4.63488e+06	4.54654e+06	3.35054e+06	3.19393e+06	6.20441e+06	9.40063e+06	9.44342e+06	4.9233e+06	3.56624e+06	5.08799e+06
572.38965-3.358	1.44005e+06	2.96353e+06	3.31402e+06	2.55662e+06	2.22082e+06	2.70135e+06	2.74707e+06	2.49894e+06	2.36737e+06	2.11425e+06	3.33123e+06	3.16469e+06	1.81163e+06	2.08714e+06	1.87973e+06	1.9268e+06	1.53406e+06	1.83886e+06	2.15499e+06	2.38579e+06	2.11418e+06	1.56913e+06	1.96223e+06	2.20461e+06	2.64925e+06	3.3051e+06	3.63303e+06	3.96095e+06	2.32133e+06	1.33755e+06	1.63852e+06	1.25489e+06	2.01314e+06	1.95559e+06	1.65895e+06	1558875	1.19918e+06	1.70248e+06	1.28319e+06	2.06076e+06	1.42486e+06	1.97376e+06	2.12168e+06	7.05488e+06	3.43871e+06	2.65014e+06	1.4776e+06	1.61122e+06
570.37952-2.826	1.28388e+06	1.55232e+06	1.66826e+06	1.99783e+06	2.61763e+06	2.10752e+06	1.41088e+06	1.30959e+06	2.10559e+06	1.77928e+06	1.07396e+06	1.05728e+06	1.61234e+06	1.76579e+06	1.56725e+06	1.53889e+06	2.41681e+06	1.46876e+06	2.58912e+06	1.71079e+06	1.57047e+06	1.49431e+06	1.31356e+06	1.7344e+06	2.05765e+06	1.97961e+06	1.94059e+06	1.90157e+06	2.09667e+06	2.21373e+06	1.62692e+06	1.67244e+06	1.89153e+06	1.51628e+06	1.8383e+06	1.63602e+06	1.13889e+06	1.41434e+06	2.31554e+06	1.65378e+06	1.64104e+06	1165470	2.20793e+06	7.05762e+06	3.38528e+06	1.90137e+06	1.6128e+06	1.72452e+06
622.4812-10.922	349906	543233	240725	40010.8	111938	40972.4	406338	71566.6	266307	114593	232491	232383	288372	195924	34105	57077.7	88902	264833	158911	205649	291883	608830	185740	554445	348385	381729	398401	415073	331714	281698	102848	204419	226218	214325	218768	49802.4	64529.1	365332	321524	70768.9	219548	199302	416298	5.76987e+06	683954	520889	205975	424068
636.62823-9.778	123853	113473	166438	176473	115141	104412	165064	158023	143186	133110	108921	114405	76578.9	182618	189545	107019	94039.6	127399	178771	163826	110950	126904	129463	142430	125326	103199	92136	81072.7	136389	169579	217775	146737	197991	194735	156823	100247	71683.7	144438	172587	149275	142390	32467.8	263026	5.57337e+06	426305	111220	54181.9	207617
634.46234-9.395	250257	336443	391403	532494	419691	235828	424640	462481	444335	451063	238280	278880	558154	574653	421634	441754	420421	255233	486997	200873	418605	230942	320728	267492	300693	287219	280482	273745	307430	327640	364732	418528	309455	372330	225300	221539	421284	121167	229653	352018	290773	381545	717275	5.8261e+06	1.11579e+06	332901	297551	210599
650.4314-5.522	749917	704096	395492	253630	387842	165273	413168	673736	797108	608289	264290	366737	851092	850637	836385	717667	1.01219e+06	734589	782834	556810	266510	608374	360198	375422	480760	450939	436029	421119	495670	540401	498834	861384	843936	431321	676615	645629	383742	693052	884262	524040	536203	384697	1.10469e+06	6.40029e+06	1.53819e+06	1.11989e+06	1.3191e+06	856669
664.5885-11.512	605475	698348	560086	447692	830591	313349	817368	815533	926938	948571	558520	765992	947080	1.16601e+06	1.05139e+06	793743	568330	993402	1.57857e+06	717115	623739	1.2004e+06	1.3169e+06	1.19206e+06	606114	685966	725893	765819	566187	446408	624885	578384	785283	530158	391336	702146	437663	501037	480535	495394	1.07151e+06	633102	814813	5.93773e+06	1.30701e+06	773435	558207	825961
662.49664-10.771	1.13064e+06	1203276	1.90266e+06	1.68312e+06	1.37143e+06	1.0744e+06	1.11834e+06	918975	1.32045e+06	735070	972815	736618	1.76229e+06	1.49499e+06	2.80238e+06	1.41581e+06	1.8892e+06	1.65607e+06	938147	1010800	2.13603e+06	1.23289e+06	1.73233e+06	888178	1.25072e+06	1.27467e+06	1.28664e+06	1.29862e+06	1.23874e+06	1.20282e+06	1213326	657773	890208	740537	1.18669e+06	1.0824e+06	658398	618310	756288	1.42156e+06	677583	838019	1.48702e+06	6.59447e+06	2.42336e+06	1.05472e+06	488024	832111
660.52252-9.114	36414.1	23977.7	46301.4	25981.4	13044.5	13637	241477	22142.8	24626.8	9375	16657.9	944791	46793.7	21243.6	22073.3	25578.6	31042.6	31219	40335.7	42808.1	69793.5	36102.2	24545.5	20531	23781.5	24359.4	24648.3	24937.3	23492.6	22625.8	33481.7	50880.6	32689.4	23154.7	35159.1	45200.5	33763.4	14982.7	53193.9	49180.6	34402.8	141473	66696.4	5.53782e+06	107490	38624.5	103351	44377.8
658.50671-8.375	98929.8	419921	226936	379705	49280.5	86294	427843	148321	223069	181363	147658	414746	138989	287454	162445	255256	102646	256637	147317	340726	301275	257963	373454	179490	145166	193143	217131	241120	121177	49211.2	448850	260689	376158	269372	153855	231047	227848	363259	69183.1	463509	246155	127864	454013	5.64396e+06	635070	192373	296400	283262
650.4422-4.391	882979	983732	1.674e+06	1.80688e+06	1.92363e+06	1.38382e+06	1327131	2.01222e+06	1.81723e+06	1.62873e+06	1.26059e+06	908141	2.04127e+06	2.24827e+06	2.67732e+06	1.37981e+06	2.24453e+06	1.61524e+06	3.08282e+06	1.64368e+06	1618560	1.88646e+06	2.24326e+06	1.94117e+06	1.67677e+06	1.63479e+06	1.61379e+06	1.5928e+06	1.69777e+06	1.76074e+06	2.06122e+06	1.86697e+06	2.33324e+06	2.03419e+06	2.0011e+06	2253660	1.70086e+06	2.4221e+06	1.68682e+06	2.52726e+06	3.75906e+06	1.433e+06	4.26082e+06	8.00399e+06	7.05997e+06	2.24829e+06	3.37889e+06	2.76078e+06
454.29175-2.796	3.22045e+06	4.51809e+06	3.51211e+06	3.85453e+06	3.19226e+06	2.35614e+06	2.08646e+06	3.64812e+06	4.00904e+06	2.6047e+06	2.33278e+06	2.4108e+06	2.90474e+06	3.3939e+06	2.95109e+06	3.43054e+06	3.36447e+06	3.33282e+06	3.44426e+06	3.21532e+06	2.5677e+06	2.68878e+06	2.949e+06	3.6051e+06	3.60683e+06	3.09908e+06	2.84521e+06	2.59134e+06	3.8607e+06	4.62231e+06	3.84051e+06	6.02509e+06	4.41254e+06	2.3638e+06	2.97305e+06	2.69295e+06	2.49334e+06	3.13797e+06	5.53805e+06	3.25667e+06	3.03174e+06	3.15579e+06	6.58446e+06	9.92533e+06	8.89818e+06	1.38443e+07	2.17482e+07	6.72165e+06
480.29825-2.167	1.09268e+06	655438	1.36925e+06	2.05882e+06	861477	835144	876588	904507	1.12968e+06	1.13966e+06	927162	1.0979e+06	1.30923e+06	765652	1.13578e+06	1.10852e+06	1.2014e+06	813520	916527	2.00032e+06	1.06956e+06	763929	904505	1.01876e+06	803506	768117	750422	732727	821201	874285	1.10683e+06	1.214e+06	1.56903e+06	686171	1.03897e+06	750477	732624	826243	3.00937e+06	1.17555e+06	881702	507918	2.15711e+06	6.38807e+06	3.13055e+06	1.11545e+06	1.42508e+06	792256
478.29205-2.232	7.54646e+06	6539688	8.42049e+06	1.0743e+07	7.64611e+06	5.36306e+06	3.61242e+06	7.55168e+06	6.75025e+06	3.79514e+06	4.59201e+06	4.65159e+06	6.12463e+06	8.12832e+06	9.64244e+06	8.4597e+06	1.22164e+07	1.00992e+07	7.4769e+06	4.20155e+06	3.92563e+06	4.97715e+06	7.07557e+06	5.57448e+06	7.8371e+06	6.48113e+06	5.80315e+06	5.12516e+06	8.51508e+06	1.0549e+07	3.76265e+06	1.1678e+07	8.45989e+06	2.47762e+06	8.78425e+06	2.51902e+06	6.22145e+06	3.44837e+06	1.05043e+07	5.36516e+06	8.077e+06	3.80873e+06	9.36766e+06	1.15446e+07	12604538	1.48832e+07	1.14395e+07	14388300
506.32153-3.444	262215	266364	311559	609677	280356	247217	236077	294587	304729	208939	425893	198415	594279	557584	325221	845350	460813	426598	494549	232704	259201	266466	610515	145854	149076	159421	164594	169766	143903	128385	324014	1.04037e+06	448473	164316	312976	227938	289050	228377	406653	268487	470421	348897	855364	5.95579e+06	1.06392e+06	1.68198e+06	2.38827e+06	570112
526.35895-2.727	1.84099e+07	2.10842e+07	2.16169e+07	2.21174e+07	2.25659e+07	1.63859e+07	8.94436e+06	2.03451e+07	1.81554e+07	1.71139e+07	1.39664e+07	1.22561e+07	9.22296e+06	9.71878e+06	1.00683e+07	2.62192e+07	2.13867e+07	1.65067e+07	3.60609e+07	1.64527e+07	1.52028e+07	1.32221e+07	7.92815e+06	2.16263e+07	2.64932e+07	3.25015e+07	3.55056e+07	3.85098e+07	2.3489e+07	1.44765e+07	1.78886e+07	2.44174e+07	25091280	2.22847e+07	3.96502e+07	2.51198e+07	1.44463e+07	2.7537e+07	2.89756e+07	2.97067e+07	2.0088e+07	1.95831e+07	4.16057e+07	1.55119e+07	7.41317e+07	1.50865e+07	2.63717e+07	3.21074e+07
552.40118-8.485	740272	750952	1.1646e+06	460719	506170	395112	380246	1.47836e+06	869649	968854	327166	537080	1.07435e+06	1.08089e+06	639842	423461	557725	361446	1.29178e+06	941236	775956	954320	1.36554e+06	906195	836214	789424	766028	742633	859610	929796	967916	769985	1.46854e+06	1.15084e+06	838643	1.41387e+06	636273	524189	658057	931740	1.46848e+06	935425	1.20302e+06	6.51596e+06	1.83786e+06	1.24641e+06	830161	834682
730.5376-10.59	6.80514e+06	7530360	6.56536e+06	7.93903e+06	9.91111e+06	6.79812e+06	6238497	6.6461e+06	1.00963e+07	8.33792e+06	4.8735e+06	4.31067e+06	8.67086e+06	9.92399e+06	1.24947e+07	7.95471e+06	8.98836e+06	8.3618e+06	1.08219e+07	7.55066e+06	6334560	8.21913e+06	7.4417e+06	8.529e+06	5.50393e+06	4.94057e+06	4.6589e+06	4.37722e+06	5.7856e+06	6.63063e+06	5.65887e+06	5.66324e+06	1.35146e+07	5.76252e+06	7.6645e+06	8.81589e+06	5.61679e+06	1.00172e+07	8.03642e+06	8.11403e+06	1.68234e+07	3.50962e+06	1.35771e+07	1.71448e+07	2.2571e+07	1.0528e+07	1.27667e+07	7.15389e+06
728.52185-9.43	4.35628e+06	3454482	5.58902e+06	6.7352e+06	5.32225e+06	2.93329e+06	4.73593e+06	5.5624e+06	5.87474e+06	4.3482e+06	3.60236e+06	4.00577e+06	6.33947e+06	6.04348e+06	7.41102e+06	6.0141e+06	9.19837e+06	4.34129e+06	7.15598e+06	3.90824e+06	3.83662e+06	4.83967e+06	4.39213e+06	5.4762e+06	3.07372e+06	2.57849e+06	2.33087e+06	2.08326e+06	3.32133e+06	4.06418e+06	5.32879e+06	7.26371e+06	4.30545e+06	2.83179e+06	3.97929e+06	7.22872e+06	5.51842e+06	3.58376e+06	6.05992e+06	5.42634e+06	4.59285e+06	4.61652e+06	1.19488e+07	1.14745e+07	1.67843e+07	8.29603e+06	1.86039e+07	5.12662e+06
726.47278-5.765	2.55246e+06	3.21224e+06	1.68161e+06	3.16797e+06	2.57551e+06	2.40283e+06	1.46103e+06	2.39066e+06	2.53906e+06	2.51903e+06	1.95766e+06	1.01976e+06	2.08398e+06	2.73538e+06	4308600	2.71228e+06	1.80701e+06	2.58589e+06	1.55561e+06	2.19909e+06	2073558	2.11622e+06	2.76203e+06	2.2315e+06	3.24165e+06	3.64172e+06	3.84175e+06	4.04179e+06	3.04162e+06	2.44152e+06	4040340	4.00085e+06	3.28449e+06	2.65906e+06	2805220	2.73825e+06	2.44246e+06	3.85038e+06	4.91151e+06	3.70824e+06	3.27728e+06	1.38058e+06	6.46593e+06	8.71235e+06	1.06295e+07	4.14442e+06	5.08354e+06	4.96524e+06
746.56873-12.677	3.03657e+06	2899194	2.01085e+06	914082	3.53798e+06	1.85987e+06	2.90829e+06	1.17268e+06	2.68866e+06	2.14465e+06	1.2553e+06	2.12971e+06	2.91972e+06	3.81109e+06	586289	1.91863e+06	3.47112e+06	2.11637e+06	2.51849e+06	2.74938e+06	5.59108e+06	2.80597e+06	2.15911e+06	2.85508e+06	1.40471e+06	1.27554e+06	1.21096e+06	1.14638e+06	1.46929e+06	1.66303e+06	748978	3.08207e+06	2.0947e+06	1.4083e+06	3.26552e+06	1.73308e+06	1.77809e+06	3.09986e+06	2.12229e+06	652149	1.62053e+06	2.55772e+06	4.58755e+06	8.33798e+06	6.35533e+06	3.24661e+06	2.09164e+06	2.94415e+06
744.55194-11.449	4.91932e+07	76270944	5.44665e+07	8.70087e+07	8.74666e+07	4.50842e+07	74256378	8.94601e+07	8.73581e+07	4.3355e+07	3.27048e+07	5.08676e+07	7.43637e+07	90405120	4.21908e+07	7.77337e+07	123342796	6.09715e+07	9.80302e+07	6.02823e+07	74427492	6.98026e+07	6.99733e+07	7.49671e+07	4.42869e+07	4.30565e+07	4.24412e+07	4.1826e+07	4.49022e+07	4.67479e+07	4.63783e+07	6.66606e+07	6.17507e+07	4.92738e+07	6.97406e+07	7.49433e+07	4.40414e+07	6.95791e+07	5.3549e+07	5.43908e+07	4.74495e+07	6.34159e+07	1.09608e+08	7.75927e+07	1.61903e+08	6.8639e+07	8.08555e+07	1.03611e+08
762.58026-11.142	778819	1.30024e+06	1.07874e+06	1.2819e+06	1.02348e+06	1.0177e+06	1.22486e+06	1.8479e+06	1.01268e+06	728754	777755	884806	1.71135e+06	1.202e+06	1.34329e+06	1.58635e+06	1.58398e+06	1.35048e+06	1.50742e+06	991080	902874	1.09787e+06	1.24351e+06	1.30039e+06	1.53122e+06	1.46883e+06	1.43764e+06	1.40645e+06	1.56241e+06	1.65599e+06	1.58847e+06	1.19109e+06	1.41948e+06	1.75102e+06	1.8919e+06	1.4925e+06	1.50961e+06	1.25512e+06	1.30521e+06	1.72096e+06	1.80863e+06	1.70294e+06	3.53484e+06	7.88471e+06	5.3478e+06	2.4114e+06	2.64411e+06	2.19027e+06
758.59424-10.348	1.1572e+06	1.58347e+06	302029	402361	256162	238992	787220	291351	3.44711e+06	248717	173230	661797	662194	347870	1.29745e+06	276032	405555	258399	432945	279946	1074492	5.44506e+06	3.2322e+06	313369	1.44223e+06	1.48204e+06	1.50195e+06	1.52186e+06	1.42232e+06	1.36261e+06	1.12895e+06	506571	884906	301250	715766	257576	902306	817567	1.0839e+06	2.54432e+06	311633	686285	9.33583e+06	6.34832e+06	1.66726e+07	2024970	1.16641e+06	572879
756.55151-9.787	5.79406e+08	5.54032e+08	4.8963e+08	702134400	1001597151	6.0786e+08	420473712	4.7451e+08	6.63206e+08	6.81974e+08	3.95157e+08	3.42063e+08	5.84574e+08	8.20563e+08	8.18425e+08	8.83133e+08	7.67376e+08	7.17464e+08	7.47474e+08	5.48705e+08	493441632	470998771	5.36045e+08	4.83134e+08	5.89504e+08	4.94326e+08	446736685	3.99147e+08	6.37094e+08	7.79861e+08	5.18638e+08	6.16981e+08	7.29399e+08	5.74003e+08	6.54597e+08	7.4126e+08	3.25594e+08	9.32875e+08	482273053	7.50783e+08	1214617863	2.499e+08	9.00585e+08	7.37281e+08	1465211069	7.3175e+08	734670000	8.56528e+08
776.4577-7.199	765740	909680	1.32429e+06	1.51174e+06	1.79345e+06	822963	842446	1.08631e+06	1.22504e+06	960015	686885	701990	1.4749e+06	1379990	1.94579e+06	1.30785e+06	2.37336e+06	974645	1.05367e+06	698711	709231	973934	869987	1.05882e+06	1.02425e+06	886765	818022	749279	1.09299e+06	1.29922e+06	1.05618e+06	950318	1.19034e+06	792101	1.21603e+06	1.34852e+06	661410	654533	1.29129e+06	1.20272e+06	1.02015e+06	788905	1.96964e+06	6.66263e+06	3.09554e+06	1.19313e+06	2.27575e+06	1.9376e+06
752.43329-3.169	399369	376458	415289	307525	508571	155075	421884	280120	329397	346977	343910	269925	603813	470613	169196	412905	1.4713e+06	328923	653246	281210	1.68512e+06	471984	333902	366914	400717	520711	580708	640705	340720	160729	324926	349763	551736	601692	735047	623721	1.63695e+06	415878	2.10838e+06	433841	411357	523928	648320	6.09433e+06	1.10106e+06	608779	363870	166323
774.55957-10.587	1.15846e+06	1.33898e+06	2.38757e+06	2.03066e+06	806940	1.32424e+06	1.17967e+06	1.7937e+06	2.27092e+06	1.08645e+06	921488	1.06751e+06	2.24021e+06	2.52917e+06	1.99668e+06	777215	2.74124e+06	1.89854e+06	3.8268e+06	1.77631e+06	1.8098e+06	1.01688e+06	2.3184e+06	1.7539e+06	1.76612e+06	1.52761e+06	1.40835e+06	1289090	1.88538e+06	2.24316e+06	2.58341e+06	2.21919e+06	4.37237e+06	2.40332e+06	2.25379e+06	4.12557e+06	1.96803e+06	2.49011e+06	1.97838e+06	2.0537e+06	7.17023e+06	2.52871e+06	4.78236e+06	9.86088e+06	8.37883e+06	3.38805e+06	4.79585e+06	1.2381e+06
772.56061-9.028	6.65253e+06	5.74837e+06	5.96654e+06	1.03092e+07	8.36553e+06	4.25331e+06	9.08794e+06	8.28555e+06	9.91102e+06	4.09154e+06	4.92935e+06	6.44547e+06	9.51772e+06	9.62716e+06	6.48235e+06	9.72621e+06	7.969e+06	6.80653e+06	1.18254e+07	4.83892e+06	5409621	5.00056e+06	7.03701e+06	5.35382e+06	4.71027e+06	4.56067e+06	4.48586e+06	4411060	4.78508e+06	5.00948e+06	8.39419e+06	1.11354e+07	9.19952e+06	7.27474e+06	7.27239e+06	1.01317e+07	7.26545e+06	3.1599e+06	8.80271e+06	9.22968e+06	6.68636e+06	8.52386e+06	14851940	1.29143e+07	2.24585e+07	7.22792e+06	2.80793e+07	9.21859e+06
770.56592-8.177	4.05168e+06	4.56807e+06	4.46659e+06	2.19668e+06	3.93505e+06	5.2894e+06	4.8675e+06	3.49216e+06	4.94588e+06	5.17467e+06	4.04982e+06	2.59729e+06	3.04563e+06	4.7217e+06	8.63723e+06	6.10086e+06	4.31564e+06	3.92829e+06	5.97019e+06	3.35654e+06	4406448	2.03629e+06	3.90535e+06	2.40477e+06	3.54344e+06	3.73626e+06	3.83267e+06	3929080	3.44704e+06	3.15781e+06	5.62098e+06	2.23028e+06	4.0059e+06	5.78379e+06	6.06691e+06	4.75616e+06	2.36007e+06	4.79227e+06	6.64312e+06	1.76021e+06	4.80734e+06	4.13495e+06	7.26421e+06	8.80524e+06	1.18502e+07	6.07085e+06	5.19476e+06	5.97731e+06
768.57654-7.379	1.37969e+07	1.57755e+07	1.66927e+07	1.96945e+07	1.7099e+07	6.27993e+06	21851265	1.95583e+07	1.58507e+07	1.68102e+07	1.33248e+07	1.17148e+07	2.41849e+07	2.34175e+07	1.85685e+07	1.76478e+07	2.21029e+07	1.40269e+07	1.84131e+07	1.31108e+07	1.24647e+07	1.22133e+07	1.59862e+07	1.61352e+07	1.32772e+07	1.12964e+07	1.0306e+07	9.31563e+06	1.42676e+07	1.72387e+07	1.95597e+07	1.68149e+07	1.61478e+07	16250280	9448260	1.80133e+07	1.3148e+07	8.32398e+06	9.13393e+06	2.08177e+07	1.58359e+07	1.53195e+07	2.97214e+07	1.38974e+07	4.43699e+07	2.09218e+07	35386575	1.06543e+07
770.49994-7.135	3.97759e+06	2641188	4.99906e+06	6.20405e+06	5.80135e+06	2.97239e+06	5.6587e+06	5.11707e+06	5.57231e+06	4.00133e+06	3.51393e+06	3.49187e+06	6.38983e+06	6.06193e+06	4.89521e+06	6.40273e+06	7.2493e+06	4.20566e+06	7.18293e+06	3.21202e+06	3.7719e+06	3.14742e+06	4.02081e+06	3.86586e+06	3.074e+06	2.84076e+06	2.72414e+06	2.60752e+06	3.19062e+06	3.54048e+06	5.34263e+06	5.51044e+06	5.4776e+06	4.77522e+06	4.38504e+06	6.93784e+06	4.95231e+06	1.70838e+06	5.32333e+06	6380900	4.40874e+06	5.04927e+06	9.43943e+06	9.36564e+06	1.35911e+07	6.75988e+06	1.37889e+07	4.37376e+06
784.55804-9.971	4.62682e+06	4834716	6.03953e+06	6.99992e+06	5.98407e+06	4.31905e+06	4.8507e+06	6.45221e+06	6.32932e+06	5.65039e+06	4.25914e+06	3.33366e+06	6.95233e+06	6.02309e+06	7.48502e+06	6.46923e+06	8.5011e+06	4.33524e+06	7.06762e+06	4.01737e+06	4759104	5.41113e+06	5.84462e+06	5.74276e+06	4.47461e+06	3.60903e+06	3.17624e+06	2.74345e+06	4.9074e+06	6.20576e+06	6.58686e+06	7.10614e+06	6.05603e+06	4.09532e+06	5.2469e+06	6.86812e+06	5.53773e+06	4.39085e+06	6.48663e+06	6.68902e+06	5.07153e+06	5.21172e+06	1.1629e+07	1.17923e+07	1.6833e+07	8.21269e+06	9.40248e+06	5940150
782.55939-10.032	1.25914e+08	1.25425e+08	1.55577e+08	2.31461e+08	1.76627e+08	1.03833e+08	116086008	1.79664e+08	1.79469e+08	1.54859e+08	1.09974e+08	9.83653e+07	1.70272e+08	1.98367e+08	1.89956e+08	1.62331e+08	225982701	1.45149e+08	1.83446e+08	1.26481e+08	125386704	1.24891e+08	1.6226e+08	1.4515e+08	1.14189e+08	9.80673e+07	9.00066e+07	8.19459e+07	1.22249e+08	1.46432e+08	1.84918e+08	2.01479e+08	1.42826e+08	9.25948e+07	124842880	1.79623e+08	1.31646e+08	1.21062e+08	1.71843e+08	1.8488e+08	1.23939e+08	1.29973e+08	2.86687e+08	1.62595e+08	4.12366e+08	2.06232e+08	326030820	1.66449e+08
780.55579-9.98	1200335926	1191477833	1694346456	1893179386	1685488156	1098900000	1259372640	1696657962	1714541851	1477988765	1174724059	1050308478	1877658862	1659954967	2040564313	1742670171	2451588562	1205501571	1950857359	1072103961	1187075520	1383756243	1525475821	1550434602	1111551333	8.93103e+08	7.83878e+08	6.74654e+08	1220775748	1548448994	1763740965	1917423570	1537359360	9.69509e+08	1313217396	1922969937	1418201600	1140562954	1646259650	1746121569	1309673065	1380561809	3102164956	1678257842	4449076120	2246950730	3087088560	1563198693
778.53729-8.915	3.91256e+08	4.31147e+08	2.31515e+08	6.05238e+08	8.47597e+08	4.13114e+08	274616904	4.13864e+08	4.97613e+08	5.1977e+08	3.47116e+08	331115271	4.55508e+08	929761280	6.2833e+08	7.34287e+08	6.90379e+08	7.45401e+08	5.49918e+08	5.33744e+08	287640312	2.86342e+08	4.20891e+08	4.31818e+08	3.56788e+08	2.47846e+08	1.93374e+08	1.38903e+08	4.1126e+08	5.74674e+08	344306112	5.74247e+08	8.44721e+08	407062797	3.61813e+08	6.92411e+08	3.35149e+08	9.94085e+08	2.13398e+08	6.35002e+08	1311640448	1.97728e+08	7.59645e+08	8.94591e+08	1264141415	7.92032e+08	896602140	6.52688e+08
774.44806-8.804	287181	329997	953971	828557	505898	431179	266524	550660	398586	497667	399324	360089	465392	703914	642565	467521	1.01512e+06	379891	307469	555721	542360	632522	588100	418689	295595	225213	190021	154830	330786	436360	496621	592054	421301	234066	372415	564634	335442	339112	484352	541449	378899	366847	870956	6.15829e+06	1.25696e+06	601538	1119615	838893
772.54449-7.342	1.83363e+06	1.97687e+06	2.58395e+06	5.37953e+06	2.01875e+06	2.11943e+06	1734054	2.64816e+06	2.45863e+06	1.9775e+06	1.4872e+06	1.4032e+06	1.98539e+06	3.03119e+06	3.06606e+06	3.35911e+06	3.38041e+06	2.94018e+06	2.79969e+06	2.06668e+06	2.02431e+06	2.16778e+06	1.93451e+06	2.35016e+06	1.99632e+06	1.76206e+06	1.64493e+06	1.5278e+06	2.11345e+06	2.46485e+06	3.8354e+06	2.18452e+06	2.84694e+06	1.87487e+06	825016	2.57921e+06	4.06865e+06	2.52856e+06	1.84431e+06	2.16156e+06	9.23894e+06	1.25469e+06	3.29886e+06	8.36547e+06	5.32736e+06	2.9369e+06	3.58799e+06	2.49092e+06
820.53003-6.95	546919	1.37459e+06	802470	1.01502e+06	2.04459e+06	780739	634280	1.87165e+06	848817	1.60388e+06	607058	866572	787885	2.42821e+06	1.01869e+06	1.14994e+06	2.11631e+06	1.70809e+06	914914	1.46715e+06	682880	640791	1.43241e+06	1.47859e+06	704156	660790	639107	617424	725839	790888	1.39882e+06	1.4616e+06	854115	677576	737613	433419	618723	1.89888e+06	498468	796707	2.52954e+06	1.21862e+06	1.27485e+06	7.42761e+06	1.9173e+06	2.20707e+06	1147710	941455
796.55524-7.149	1.50728e+06	2.64693e+06	3.06026e+06	3.34506e+06	2.93481e+06	1.95009e+06	2.68514e+06	3.1802e+06	1.75804e+06	1.63118e+06	2.35787e+06	1.89857e+06	1.57206e+06	1.75844e+06	2.6756e+06	2.97447e+06	2.04379e+06	3.26119e+06	3.72855e+06	2.90502e+06	1.25437e+06	1.37232e+06	3.28051e+06	2.84041e+06	3.67258e+06	3.78131e+06	3.83568e+06	3.89005e+06	3.61821e+06	3.45511e+06	5.38322e+06	1731000	4273470	2.95303e+06	4.55187e+06	2.26328e+06	2.41454e+06	1.84786e+06	4.25528e+06	5.16186e+06	3.60072e+06	1.57864e+06	5.04761e+06	9.51571e+06	8.64061e+06	5.59161e+06	2.63061e+06	4.45453e+06
794.53125-6.332	1.68747e+06	1.73519e+06	2.19054e+06	2.6156e+06	2.02163e+06	923601	1.73057e+06	1.82474e+06	2.35162e+06	1.12814e+06	1.59403e+06	1.2395e+06	2.11483e+06	2.52378e+06	3.33734e+06	3.25053e+06	3.01082e+06	2.28043e+06	2.30144e+06	1.71422e+06	1558191	1.3454e+06	1.38158e+06	1.51952e+06	1.40182e+06	1.01189e+06	816918	621951	1.59679e+06	2.18169e+06	2.56279e+06	3.41663e+06	2.41604e+06	1.49157e+06	1.55433e+06	2.22341e+06	1.88543e+06	1.11381e+06	2.94302e+06	2.65097e+06	1.67838e+06	1.68294e+06	4.64257e+06	7.69378e+06	6.39275e+06	6452430	1.34654e+07	2.55323e+06
790.41821-7.627	334111	441693	444199	346405	493880	250325	474082	396436	717967	282403	244174	210669	468852	546944	248187	245758	520089	193497	309394	255112	223008	407231	422608	559725	367998	332256	314385	296514	385869	439482	300202	477093	267355	550165	277542	248383	400185	354391	277866	641946	293939	348905	621804	5.85254e+06	863008	292990	294843	490675
810.65411-9.419	430532	136587	216659	257008	357339	76044.2	190295	257761	582425	188020	94399.4	121681	149391	180035	284925	440144	418534	123213	313551	413818	480632	478839	264859	531588	207479	175877	160076	144275	223280	270684	313977	267201	522309	352918	157845	404567	442260	99956.7	434420	273466	477750	454137	453847	5.7192e+06	660841	209254	523990	237842
804.4917-6.183	1.57034e+06	3.83223e+06	3.24913e+06	3.26016e+06	2.97256e+06	2.23898e+06	1.62198e+06	2.72715e+06	1.89991e+06	1.50241e+06	1.07058e+06	1.55612e+06	1.65867e+06	1.52623e+06	3.82152e+06	1.70865e+06	3.08001e+06	2.53642e+06	1.68633e+06	1.02784e+06	2.50249e+06	1.35901e+06	2.53367e+06	1.57864e+06	2.12602e+06	2.67819e+06	2.95428e+06	3.23036e+06	1.84993e+06	1.02167e+06	4.60469e+06	1.75796e+06	1952985	3.28714e+06	2469240	1.75637e+06	1.61787e+06	2.50636e+06	2.51059e+06	4.31494e+06	2.98389e+06	1.45261e+06	3.6015e+06	7.65936e+06	5.53688e+06	2.80969e+06	2.71601e+06	2.62114e+06
802.56635-7.379	577953	593247	584984	1515075	910918	206172	374038	835241	636496	841123	395481	433121	805855	1358990	469815	567719	567121	485136	539364	527523	1.0062e+06	443924	507603	325063	630081	565673	533469	501265	662284	758896	1.47263e+06	1.44193e+06	721945	1.0786e+06	425665	685988	1.50239e+06	913172	1.62589e+06	1.96888e+06	1.38459e+06	589302	2.40061e+06	6.70491e+06	3.47368e+06	1.51914e+06	2.69141e+06	1.17058e+06
822.44739-7.875	590377	550684	291697	664299	567332	334587	383695	762062	641122	423483	399443	503570	783097	813736	587506	453887	428448	285975	481355	219142	701787	317213	156463	402876	323473	280817	259489	238161	344801	408784	682119	753038	356981	623430	400076	355374	682694	572390	738318	393830	774308	678719	1.47029e+06	6.06793e+06	2.24486e+06	605745	1.27358e+06	580684
826.52142-4.554	207718	507651	444193	560716	498219	233810	343949	536824	357220	161848	359699	329906	1.195e+06	437485	357467	309254	1.21891e+06	407207	561295	217708	1.06963e+06	300852	357381	454177	376912	409824	426280	442736	360455	311087	377477	311446	267299	415898	162497	241635	472337	179467	355004	427060	427001	341350	465454	5.79746e+06	640477	155900	282142	224645
828.547-5.527	1.50629e+06	2.67425e+06	2.27698e+06	2.14418e+06	2.13978e+06	1.17903e+06	1.60378e+06	1.42735e+06	2.2389e+06	1.11086e+06	1.57383e+06	1.68662e+06	1.21139e+06	1943250	1.23497e+06	1.68656e+06	1.19252e+06	1.77337e+06	1.82462e+06	1.07545e+06	1201986	922591	1.16052e+06	1.59641e+06	1.98366e+06	2.25153e+06	2.38547e+06	2.51941e+06	1.84972e+06	1.4479e+06	2.8369e+06	2.70299e+06	2.2061e+06	1.73878e+06	1.35656e+06	2.09463e+06	885395	2.00059e+06	1.41236e+06	2.97115e+06	1.59025e+06	1.04455e+06	2.22218e+06	6.88776e+06	3.14573e+06	2555220	1.31608e+06	1.1049e+06
832.49066-6.824	902345	784313	1.4388e+06	1.45088e+06	1.28957e+06	885172	714156	954137	1.2182e+06	580887	547021	438308	680917	1.43397e+06	974192	747677	446104	1.14866e+06	587334	929893	983118	875801	540035	948170	446202	523548	562221	600894	407529	291510	1.25133e+06	1.02202e+06	918401	865653	513644	509369	794383	583762	1.17587e+06	1.33081e+06	1.08764e+06	382818	1.8512e+06	6.32269e+06	2.72019e+06	1.60727e+06	802274	1.05632e+06
836.54297-7.382	1.84536e+06	2.08369e+06	2.14515e+06	3.27415e+06	4.57249e+06	2.11552e+06	2.04429e+06	4.44804e+06	4.22281e+06	3.21413e+06	1.59659e+06	2.07014e+06	3.70891e+06	6.43146e+06	3.0364e+06	4.74811e+06	4.97435e+06	3.85564e+06	4.87565e+06	4.7365e+06	1.76495e+06	1.77117e+06	2.45317e+06	3.48044e+06	3.08961e+06	2.47862e+06	2.17312e+06	1.86763e+06	3.39511e+06	4.3116e+06	2810256	3.13963e+06	3.02278e+06	3.03378e+06	2.0824e+06	3557910	2.81108e+06	5.68689e+06	1.21813e+06	2.59799e+06	7.12267e+06	2.53889e+06	4.08559e+06	9.85209e+06	5.77975e+06	4.84587e+06	5.59902e+06	5.41297e+06
852.71454-12.614	1.25959e+06	1.55145e+06	1.43332e+06	2.60687e+06	1.22946e+06	1.15909e+06	2649951	3.34812e+06	1.1374e+06	1.30158e+06	1.32174e+06	1.78077e+06	897996	2.25954e+06	1.54557e+06	2275175	944940	1.57989e+06	3.14316e+06	1.86514e+06	3.49158e+06	878792	2.30683e+06	2.52369e+06	3.38046e+06	3.98059e+06	4.28066e+06	4.58072e+06	3.08039e+06	2.1802e+06	4.41507e+06	1.92355e+06	4.99661e+06	2.28804e+06	2.76272e+06	3.50381e+06	4.78543e+06	2.03208e+06	1.60888e+06	4.46995e+06	3.45733e+06	2.22787e+06	4.69722e+06	7.70734e+06	7.89177e+06	1.86619e+06	6.6502e+06	4.55153e+06
846.6825-12.922	332071	324799	146719	117733	93774.7	108352	331367	238677	383875	99198.1	173385	456596	362496	265099	255556	193242	120934	176531	308261	277124	301600	481333	253249	612509	123978	152769	167164	181560	109582	66396	311717	364572	347782	265907	266282	170407	387676	325619	349637	328439	268583	231905	689741	5.94801e+06	1.06234e+06	423392	721386	253361
664.49237-10.773	647237	800523	335364	759137	664865	407662	875936	1.03264e+06	870041	934201	528154	632811	873991	1.13288e+06	910924	953120	397860	686150	1.46943e+06	526405	185956	1.16007e+06	1.41095e+06	1.25808e+06	672749	789058	847213	905367	614594	440130	755947	393804	775535	354181	553060	723577	326312	416826	118188	379301	1.00377e+06	654910	789865	5.80555e+06	1.35595e+06	1.00618e+06	834503	955686
662.47644-10.096	85124.4	105176	60780.8	35896.2	75016.5	39925.2	32922.8	84161.6	43437.8	40695.7	66440.9	19236.3	70192.3	40536.4	38600.3	16700	52824.8	80951.1	56311.5	69740.7	18303.8	39539.1	92641	70449.7	114780	124916	129984	135052	109712	94508.4	66769.7	114275	49139.1	74884.6	130305	53475.8	44757.6	157674	64202.9	107199	32656.8	404088	167259	5.55994e+06	234843	897878	75105.9	221467
692.51324-11.567	653434	786304	732405	335362	516149	250509	261844	674037	589717	418330	455557	547784	1.48192e+06	902634	548032	160284	440109	242081	546441	743370	420062	1.01697e+06	1.77191e+06	424214	689010	618699	583544	548388	724165	829631	656901	604932	808397	600264	1.00296e+06	1.00794e+06	550669	718233	520105	1.39864e+06	886069	455404	1.62433e+06	6.28117e+06	2.4081e+06	972414	1.49782e+06	764293
690.50275-10.962	670589	501260	582796	670397	618801	527365	768062	727341	717120	491779	238405	283049	629335	802825	630228	339225	767961	800077	900609	271540	716241	1.22942e+06	601369	779257	728333	691857	673619	655381	746570	801284	767931	293510	433925	497180	1.04747e+06	435999	390748	741095	463309	1.17121e+06	317117	377669	1.13386e+06	5879669	2.00147e+06	555367	729365	1.07826e+06
718.59473-13.043	2.61092e+06	3.27074e+06	2.1799e+06	3.33461e+06	2.65616e+06	2.01656e+06	1.59942e+06	2.71663e+06	2.08799e+06	1.57734e+06	1.40741e+06	2.80928e+06	2.27122e+06	4.74734e+06	1.87599e+06	1.64906e+06	2.1939e+06	2.28836e+06	1.57595e+06	2.81015e+06	3.22628e+06	3.90183e+06	2.62949e+06	3.32303e+06	2.13312e+06	1.57264e+06	1.2924e+06	1.01217e+06	2.41336e+06	3.25408e+06	3.06139e+06	3.4863e+06	2.82405e+06	1.15475e+06	1.81905e+06	2.46139e+06	3.23902e+06	3.69302e+06	4.06701e+06	2.80265e+06	1.84912e+06	2.33424e+06	4.59264e+06	9.61716e+06	6.28146e+06	4.62393e+06	7.62203e+06	4.01309e+06
716.52283-11.88	1.57345e+08	2.31386e+08	1.89485e+08	223736986	2.03736e+08	1.68389e+08	125745240	1.98328e+08	1.74566e+08	1.50961e+08	1.095e+08	1.30464e+08	158880000	2.18506e+08	1.65151e+08	1.88603e+08	2.27014e+08	1.52367e+08	1.73183e+08	1.91162e+08	164231808	1.98024e+08	1.65991e+08	223103156	1.65546e+08	140911188	1.28594e+08	1.16277e+08	1.77863e+08	2.14815e+08	150036768	1.90851e+08	1.64641e+08	1.09689e+08	1.54858e+08	1.45126e+08	1.19975e+08	2.17366e+08	1.82334e+08	1.63165e+08	1.43582e+08	1.44292e+08	2.77848e+08	1.98991e+08	4.00017e+08	2.2405e+08	260203980	2.62801e+08
714.50562-10.839	8.18334e+07	9.42599e+07	8.73143e+07	1.28588e+08	1.56493e+08	7.99651e+07	75804372	6.75461e+07	1.0257e+08	88376250	5.59174e+07	5.3679e+07	9.33081e+07	1.31161e+08	1.14234e+08	1.05801e+08	1.21116e+08	1.19447e+08	9.79315e+07	7.12083e+07	77399058	6.0844e+07	1.07331e+08	8.18424e+07	7.84153e+07	7.12712e+07	6.76992e+07	6.41272e+07	8.19873e+07	9.27033e+07	1.05601e+08	9.11869e+07	1.4545e+08	7.3804e+07	1.05923e+08	1.41401e+08	5.12e+07	1.56143e+08	7.17944e+07	121594035	2.31204e+08	3.16769e+07	1.6185e+08	1.38993e+08	2.69212e+08	1.2782e+08	136086180	1.19665e+08
712.49536-9.109	1.26815e+06	1.9002e+06	1.26419e+06	1.24046e+06	1.25529e+06	955116	1.93437e+06	1.40099e+06	892774	1.27029e+06	872099	733334	730842	1.69202e+06	1.50393e+06	1.87152e+06	1.30291e+06	1.37704e+06	1.57586e+06	1.11111e+06	981148	1.07713e+06	1.37023e+06	1.32434e+06	2.03268e+06	2.21088e+06	2.29999e+06	2.38909e+06	1.94357e+06	1.67626e+06	1.48902e+06	1.08628e+06	1.1917e+06	2.44209e+06	1.64097e+06	1.13757e+06	842287	1.90258e+06	1.69913e+06	2.27037e+06	1.65629e+06	1.19849e+06	2.04287e+06	6.44624e+06	3.31324e+06	1.94509e+06	1.06165e+06	2.35146e+06
746.56207-13.026	425638	466661	548703	481431	861575	410520	359612	467536	820669	472766	242635	264409	771303	774387	925172	362213	486261	432274	631056	399691	537578	606856	629234	582039	424725	405423	395772	386121	434376	463329	530705	446610	666828	425313	618748	525742	364146	438019	481431	559745	970589	362497	866157	6.15772e+06	1.41616e+06	926555	813311	538579
744.56744-13.361	769675	2.02265e+06	2.01418e+06	2.89171e+06	2.32006e+06	1.59547e+06	2.20577e+06	2.81265e+06	2.51224e+06	1.5405e+06	1.40021e+06	1.56046e+06	2.93246e+06	2.45931e+06	1.14119e+06	1.93121e+06	1.69625e+06	2.0512e+06	1.4612e+06	2.23123e+06	2.11674e+06	1.41083e+06	2.27225e+06	2.12961e+06	831537	993411	1.07435e+06	1.15528e+06	750600	507789	938339	3.10701e+06	1.96043e+06	1.62992e+06	1.64732e+06	1.5706e+06	1.85987e+06	2.00193e+06	1.11253e+06	2.52817e+06	1.74378e+06	2.34866e+06	3.90189e+06	7.63052e+06	5.8186e+06	2.65595e+06	5.28358e+06	3.50964e+06
742.56738-10.887	2.44289e+07	3.29818e+07	2.98242e+07	3.92505e+07	3.25017e+07	2.64475e+07	25666212	3.74274e+07	3.03642e+07	25399950	2.00978e+07	2.4173e+07	3.2908e+07	3.84442e+07	3.20256e+07	3.14985e+07	3.50796e+07	2.67999e+07	3.24171e+07	2.76374e+07	26226630	2.91885e+07	3.08176e+07	3.59122e+07	2.46562e+07	2.17053e+07	2.02298e+07	1.87543e+07	2.61317e+07	3.05582e+07	2.56707e+07	3.08384e+07	2.72304e+07	2.00059e+07	2.74304e+07	2.88761e+07	2.41721e+07	3.161e+07	2.64514e+07	2.52042e+07	2.43307e+07	2.67743e+07	5.17102e+07	3.69269e+07	7.65165e+07	3.55902e+07	4.63198e+07	3.70779e+07
738.50537-9.849	1.41729e+08	1.44195e+08	1.92643e+08	2.82175e+08	2.06428e+08	1.35151e+08	121549884	2.00325e+08	1.87415e+08	1.63845e+08	1.26341e+08	1.35078e+08	2.17949e+08	232230880	2.43247e+08	2.00338e+08	2.94776e+08	1.46688e+08	182549398	1.37035e+08	122198940	1.63914e+08	1.60599e+08	1.9637e+08	1.26521e+08	9.47783e+07	7.8907e+07	6.30356e+07	1.42392e+08	1.90007e+08	1.75858e+08	2.18714e+08	1.59772e+08	8.54069e+07	1.45195e+08	2.22449e+08	1.54888e+08	1.33487e+08	1.87742e+08	1.85836e+08	133695856	1.43175e+08	3.32342e+08	2.05838e+08	4.75095e+08	2.72527e+08	446807100	205764000
736.48987-8.743	4.97543e+07	3.26966e+07	8.07979e+07	9.86216e+07	6.08991e+07	3.66614e+07	37737477	5.50839e+07	5.32439e+07	5.53933e+07	5.17684e+07	3.80039e+07	6.90901e+07	6.36157e+07	1.00445e+08	7.84199e+07	1.13314e+08	4.2716e+07	5.79147e+07	4.19718e+07	30153843	5.63346e+07	4.33089e+07	6.76261e+07	3.68096e+07	2.44547e+07	1.82773e+07	1.20999e+07	4.2987e+07	6.15193e+07	8.88558e+07	7.30552e+07	5.5144e+07	2.06784e+07	6.04232e+07	1.1974e+08	5.89839e+07	2.98422e+07	7.94211e+07	8.31935e+07	4.91017e+07	6.72066e+07	1.16749e+08	7.5772e+07	1.6281e+08	1.14277e+08	201308340	6.82816e+07
754.49866-7.071	528814	610939	666525	746995	689738	295649	975067	651093	1.33761e+06	264729	959894	890923	1.23513e+06	707809	1.75952e+06	1.68131e+06	1.47169e+06	1.44938e+06	1.38893e+06	1.25657e+06	557640	854835	846444	1.20282e+06	981994	585950	387928	189905	1.18002e+06	1.77408e+06	1.22574e+06	1.71126e+06	1.31616e+06	902617	468196	869294	825357	268891	746020	541984	487434	993672	1.76924e+06	6.13412e+06	2.20524e+06	3.50129e+06	9.23399e+06	881025
752.48535-6.328	537992	634101	563561	602228	636065	297156	345792	612065	620622	384793	157429	244659	651204	629482	884300	557404	544819	518244	403886	378806	308936	472729	396328	378008	507242	535319	549357	563395	493204	451089	735453	1.05012e+06	890056	684450	579689	501151	680230	634527	787590	478027	259957	520229	1.30157e+06	6.09103e+06	1.80612e+06	2.31819e+06	5.41155e+06	1.26154e+06
784.58044-11.141	1.23009e+08	1.2047e+08	1.60127e+08	1.26533e+08	1.86377e+08	1.29025e+08	114648420	1.21387e+08	173293902	1.51237e+08	1.03378e+08	7.56368e+07	1.17529e+08	1.66101e+08	1.92823e+08	1.20754e+08	1.41298e+08	1.12308e+08	1.85299e+08	1.18122e+08	122704500	1.40183e+08	115723797	1.72402e+08	1.34283e+08	124640765	1.1982e+08	1.14999e+08	1.39104e+08	1.53566e+08	1.26815e+08	1.2679e+08	1.68912e+08	1.11818e+08	1.4048e+08	1.25604e+08	8.6697e+07	1.52159e+08	1.37856e+08	1.28287e+08	1.43494e+08	8.62544e+07	2.22001e+08	1.58503e+08	3.55993e+08	1.63909e+08	156846780	1.57985e+08
794.56836-9.41	1.39717e+07	9.5435e+06	1.44188e+07	2.36871e+07	1.65152e+07	8.15422e+06	1.45853e+07	1.99937e+07	2.08279e+07	1.39902e+07	1.11708e+07	1.41038e+07	2.51132e+07	1.77124e+07	2.30369e+07	1.92772e+07	2.74443e+07	1.70116e+07	2.33439e+07	9.23392e+06	1.28154e+07	1.26268e+07	1.54196e+07	1.35466e+07	1.10219e+07	8.98043e+06	7.95972e+06	6939010	1.20426e+07	1.51047e+07	1.69109e+07	2.12406e+07	1.45917e+07	1.22059e+07	1.45232e+07	2.29603e+07	1.78756e+07	5.42029e+06	1.87485e+07	2.29874e+07	1.57973e+07	1.69838e+07	3.58989e+07	2.09558e+07	5.20317e+07	2.47332e+07	53603430	1.50859e+07
796.58667-13.662	4.44327e+06	5.33509e+06	4.44688e+06	7.62342e+06	1.10466e+07	6.36716e+06	5.26043e+06	4.21926e+06	5.12697e+06	5.0983e+06	5.05387e+06	3.91608e+06	5.4713e+06	1.05089e+07	7.26867e+06	6.48896e+06	7.39537e+06	7.19647e+06	5.46431e+06	4.20103e+06	3416655	3.55834e+06	5.62751e+06	5.85623e+06	3.51343e+06	3.10006e+06	2.89338e+06	2.68669e+06	3.72012e+06	4.34018e+06	4729428	3.42649e+06	7.98533e+06	3.97309e+06	4.61189e+06	5.8292e+06	2.68635e+06	4.84373e+06	3.74515e+06	4.81499e+06	6.80767e+06	1.68721e+06	6.71035e+06	1.26594e+07	1.11019e+07	5.1508e+06	5.68818e+06	4.82023e+06
820.66449-15.326	909590	1079964	771789	1.4492e+06	1.16312e+06	742863	788127	1.26678e+06	1.22268e+06	828682	535983	859162	1.15141e+06	1.35571e+06	629605	922570	955650	975458	975586	775070	1.04918e+06	507822	1.01588e+06	973136	790460	708652	667748	626845	831363	954075	1.17169e+06	1.46116e+06	1117845	593063	941268	1.00899e+06	752037	721505	1.08081e+06	1.1727e+06	702905	777257	1.56036e+06	6.53717e+06	2.23539e+06	1.43903e+06	2.66833e+06	1.11849e+06
844.69904-19.336	1.77651e+06	1.74416e+06	1.42808e+06	2.79843e+06	1.42659e+06	1.81217e+06	1.33802e+06	1.60328e+06	1.1904e+06	942378	955829	1.77962e+06	2.04488e+06	1.86872e+06	1.41367e+06	1.77521e+06	1.7034e+06	1.73014e+06	1.64258e+06	1647600	2.41534e+06	2.10844e+06	1.38892e+06	2.53617e+06	1.20178e+06	1.2418e+06	1.26181e+06	1.28181e+06	1.18178e+06	1.12175e+06	1.25325e+06	2.24681e+06	1.28746e+06	1.36195e+06	1.44045e+06	1.15705e+06	1.0628e+06	1.71132e+06	1.14116e+06	1.4156e+06	1.63279e+06	2.00261e+06	3.67202e+06	7.6108e+06	5.20041e+06	2.58955e+06	3027390	1.70044e+06
842.66028-19.276	1.94879e+06	3.69556e+06	1.78185e+06	1.4411e+06	1.88302e+06	1.5878e+06	1.69927e+06	1.86712e+06	1.65494e+06	637362	1.01074e+06	2.1292e+06	1.84353e+06	1.9464e+06	555089	1.54651e+06	1.89206e+06	1.13104e+06	1.58002e+06	2.41729e+06	2.48694e+06	3163800	1.06158e+06	2.68135e+06	1.39616e+06	1.40572e+06	1.4105e+06	1.41528e+06	1.39138e+06	1.37704e+06	1.35874e+06	2.30946e+06	1.35374e+06	1.12146e+06	1.76081e+06	842210	956439	2.61e+06	1.17279e+06	1.25688e+06	1.4877e+06	1.61573e+06	3.14237e+06	7.54298e+06	4.61337e+06	2.11328e+06	2.87103e+06	2.69627e+06
840.64697-17.429	1.33528e+06	2.58005e+06	1.28385e+06	1.58998e+06	1.45337e+06	1.25825e+06	842342	1.44742e+06	1.18061e+06	634870	731143	1.5487e+06	1.14574e+06	1.70976e+06	480126	1.03302e+06	1.61755e+06	891259	700648	1.94535e+06	1984983	2.27603e+06	949589	2.04351e+06	928098	887617	867376	847135	948339	1.00906e+06	761730	2.23787e+06	1.47593e+06	819755	1.29008e+06	863724	1.09615e+06	2.26592e+06	1.28926e+06	887250	1.23159e+06	1.82372e+06	2.51033e+06	7.93232e+06	3.4601e+06	2.26001e+06	3.312e+06	2.57788e+06
898.72839-19.643	1.38237e+06	1480884	1.36974e+06	2.14767e+06	2.28503e+06	1.49757e+06	2122962	1.942e+06	3.19115e+06	1.75058e+06	1.26729e+06	2.24822e+06	2.88598e+06	1.78985e+06	1.62226e+06	1.39459e+06	1.04183e+06	1.63582e+06	2.62318e+06	1.0052e+06	1.96095e+06	897362	1.7453e+06	1.26456e+06	1.22695e+06	1.31581e+06	1.36025e+06	1.40468e+06	1.18251e+06	1.04921e+06	1901124	2.00853e+06	2.13623e+06	1.74832e+06	1.4033e+06	2.00332e+06	1.36433e+06	612671	1.24657e+06	1.43733e+06	1.36143e+06	2.29653e+06	2.82138e+06	6.57038e+06	4.15032e+06	2.23121e+06	3.49827e+06	1.31668e+06
896.71326-17.859	1.21791e+06	868868	1.38581e+06	2.16745e+06	1.76679e+06	1.21293e+06	1.39346e+06	1.36477e+06	2.16152e+06	1.46979e+06	1.2647e+06	1.31542e+06	2.67634e+06	1.75126e+06	1.56691e+06	1.34177e+06	1.22958e+06	2.04313e+06	2.01027e+06	723487	1301031	766008	1.72035e+06	857918	810044	874076	906091	938107	778028	681981	1.32285e+06	1.89389e+06	1.71985e+06	1.27694e+06	1.28229e+06	1.8849e+06	1.01005e+06	458117	1.15306e+06	1.14673e+06	1.02741e+06	1.84963e+06	2.34822e+06	6.47993e+06	3.29284e+06	2.20473e+06	3.8162e+06	1.0109e+06
752.5036-9.796	2.32326e+06	3680904	6.21683e+06	5.81852e+06	3.02986e+06	3.33272e+06	5371761	3.99927e+06	3.13519e+06	4.64517e+06	4.9354e+06	3.66013e+06	3.65763e+06	4.26632e+06	7.03803e+06	5.32065e+06	5.01051e+06	2.71147e+06	3.96136e+06	5.1558e+06	2.69342e+06	5.71368e+06	4.81414e+06	5.66198e+06	3.95266e+06	4.21665e+06	4.34865e+06	4.48065e+06	3.82066e+06	3.42467e+06	3.20544e+06	1.74522e+06	2.82511e+06	2.48301e+06	4.25195e+06	2.99748e+06	2.27784e+06	2.6726e+06	2.53814e+06	3.30776e+06	2.95302e+06	2.85156e+06	4.78862e+06	7.39728e+06	7.67033e+06	3.33722e+06	4.71653e+06	2.24376e+06
750.52692-8.253	768252	880341	1.24073e+06	682790	993713	743078	526446	1.39304e+06	1.40831e+06	988917	460352	463529	918075	1.25318e+06	622630	623071	1.15062e+06	1.10119e+06	1.3383e+06	1.27312e+06	709786	1.00694e+06	1.61961e+06	1.10125e+06	672308	653883	644671	635458	681520	709157	754296	807732	487268	808407	401785	874375	807138	1.02385e+06	699192	491492	1.05671e+06	662005	1.66076e+06	6.53298e+06	2.66627e+06	1.17618e+06	1.55389e+06	1.52184e+06
748.54486-7.385	966747	1.54056e+06	1.14461e+06	1.3317e+06	1.22919e+06	849491	1.43793e+06	1.33764e+06	1.32518e+06	972112	860870	1.03417e+06	935075	1.06332e+06	1.37718e+06	1.20739e+06	1.65915e+06	1.09416e+06	1.34947e+06	1.09657e+06	1006581	1.40435e+06	1.09675e+06	1.21111e+06	1.15798e+06	1.12586e+06	1.10981e+06	1.09375e+06	1.17403e+06	1.2222e+06	1.48456e+06	1.29849e+06	1.44374e+06	822494	1.26277e+06	1.25471e+06	1.27111e+06	1.24385e+06	1.418e+06	1.57501e+06	1.36543e+06	1.09918e+06	2.41278e+06	7.05392e+06	3.71938e+06	1.91417e+06	1.47542e+06	1.43575e+06
790.57806-8.891	880963	512382	1.98851e+06	2.33912e+06	1.03443e+06	1.30133e+06	1994274	2.08392e+06	2.01615e+06	1.54791e+06	1.43849e+06	1.45628e+06	2.44715e+06	807604	2.02178e+06	2.08638e+06	2.1713e+06	1.80733e+06	2.07035e+06	488459	1.59545e+06	1.60523e+06	1.73873e+06	1.8769e+06	1.40952e+06	1.2572e+06	1.18104e+06	1.10488e+06	1.48568e+06	1.71416e+06	2.09428e+06	2.33309e+06	1.63247e+06	1.42959e+06	1.50252e+06	1.76355e+06	1.9452e+06	714572	1.07794e+06	1.05302e+06	1.62628e+06	1.90905e+06	3.78363e+06	7.32566e+06	5.57562e+06	2.72035e+06	4.33254e+06	1.48896e+06
788.5354-8.12	1.80791e+06	2.64978e+06	2.06687e+06	3.15564e+06	3.9873e+06	1.94807e+06	2458056	2.04456e+06	3.33432e+06	2.66507e+06	1.91244e+06	1.49639e+06	2.87336e+06	4.235e+06	3.99028e+06	2.47878e+06	3.02978e+06	3.39629e+06	3.5608e+06	1.93301e+06	2.25715e+06	1.87349e+06	2.75529e+06	3.1076e+06	2.36667e+06	2.11318e+06	1.98644e+06	1.85969e+06	2.49341e+06	2.87364e+06	2.83818e+06	2.39536e+06	4.0291e+06	2.26758e+06	3.02219e+06	3.34116e+06	1.99502e+06	2.77415e+06	1.99709e+06	3.05931e+06	5.71532e+06	1.28198e+06	4.98357e+06	9.55988e+06	7.89828e+06	4.10888e+06	3.22666e+06	3.3334e+06
786.5271-7.311	3.26307e+06	3.34719e+06	3.32398e+06	3.73627e+06	4.34015e+06	4.87745e+06	3.72913e+06	3.27604e+06	2.97405e+06	4.00957e+06	2.7295e+06	2.11288e+06	3.12904e+06	4.88558e+06	6.08157e+06	5.10272e+06	4.82915e+06	3.76328e+06	8.34857e+06	3.65945e+06	2.91375e+06	2.57109e+06	3095450	4.85704e+06	2.31629e+06	2.63759e+06	2.79824e+06	2.95889e+06	2.15564e+06	1.67368e+06	4.07856e+06	3413750	3.73819e+06	5.37782e+06	4.12969e+06	4.18228e+06	3.4223e+06	6.76561e+06	5.86272e+06	3.24833e+06	5.01619e+06	3.02576e+06	9.77842e+06	8.69359e+06	1.59345e+07	2.61947e+06	3.78887e+06	5.39002e+06
784.50842-6.529	1.07398e+06	1246440	1.33991e+06	1.12253e+06	1.76308e+06	1.91328e+06	906868	1.0527e+06	1.67512e+06	1.62384e+06	939414	729141	1.29615e+06	2.00275e+06	2.91523e+06	1.57055e+06	2.42829e+06	1.5573e+06	2.71835e+06	1.61559e+06	1.29151e+06	982837	866509	1.69575e+06	895453	1.0457e+06	1.12083e+06	1195950	820329	594957	1.74619e+06	1.49698e+06	2.51991e+06	2.55384e+06	2.58431e+06	2.29482e+06	1.37913e+06	3327350	3.72973e+06	873776	2.3759e+06	1.18638e+06	3.79237e+06	7.02649e+06	6.41586e+06	914579	1.74668e+06	2.558e+06
840.71838-22.497	1.32081e+06	3.13306e+06	1.77692e+06	4.65329e+06	2289825	1.03163e+06	2.87899e+06	2.65844e+06	2.55989e+06	4.08038e+06	1.89596e+06	1.5312e+06	1.43467e+06	1.52744e+06	2.31891e+06	1.11604e+06	3.46371e+06	4.92254e+06	3.49565e+06	2.52631e+06	2.17573e+06	2.71942e+06	3.32129e+06	1.69411e+06	1.77833e+06	1.82555e+06	1.84915e+06	1.87276e+06	1.75472e+06	1.68389e+06	3.38789e+06	2.83379e+06	2.05691e+06	2.54894e+06	1.75313e+06	3.16433e+06	1.67713e+06	2.8094e+06	3.45425e+06	4.15877e+06	2.4113e+06	2.43074e+06	3.71678e+06	7.03983e+06	5.0145e+06	3.72161e+06	5.91961e+06	2.04961e+06
838.53674-7.868	644010	809827	954512	707488	1.06299e+06	720095	584852	903289	1.29729e+06	989448	394951	283182	970335	1.25382e+06	1.28992e+06	560732	1.16273e+06	869321	939649	1.14643e+06	636584	882683	1.02223e+06	941588	745494	718990	705738	692485	758746	798502	695274	689422	903396	772821	1.11858e+06	528838	585767	761804	756895	758627	814997	633376	1.30271e+06	6.3827e+06	2.02084e+06	1.36514e+06	1.10312e+06	1.14935e+06
836.54456-7.418	2.64391e+06	3.01182e+06	2.15747e+06	3.35886e+06	4.57652e+06	2.7911e+06	2044197	4.45369e+06	4.22377e+06	4.19909e+06	1.9891e+06	2.06812e+06	3.71194e+06	6433700	4.21937e+06	4.74827e+06	4.97524e+06	3.85311e+06	4.93159e+06	4.73999e+06	1766367	2.53896e+06	2.45283e+06	3.48212e+06	3.10598e+06	2.49998e+06	2.19698e+06	1.89398e+06	3.40899e+06	4.31799e+06	2.81456e+06	3.13857e+06	4.19702e+06	3.03605e+06	2083490	3.56404e+06	2.81211e+06	5.41572e+06	1.21237e+06	3.86412e+06	7.12585e+06	2.69707e+06	5.18276e+06	9.85081e+06	7.97406e+06	4.85051e+06	5.59741e+06	5.42282e+06
758.46277-8.487	4.51507e+06	5.17731e+06	3.98697e+06	3.47143e+06	8.08668e+06	1.5743e+06	2.57128e+06	4.44615e+06	6.28886e+06	4.74396e+06	3.42498e+06	3.24446e+06	5.7128e+06	3198470	7.51601e+06	3.37186e+06	7.64308e+06	2.05515e+06	7.78675e+06	3.02578e+06	2.46455e+06	4.93787e+06	6.56043e+06	5.92456e+06	1.41651e+06	1.14574e+06	1.01036e+06	874975	1.55189e+06	1.95804e+06	1.36636e+06	1.40208e+06	9.5576e+06	1.75284e+06	2.22447e+06	2.49703e+06	4.33438e+06	3.4032e+06	6.592e+06	2.34751e+06	4.69961e+06	1.43169e+06	8.61797e+06	1.12646e+07	1.60126e+07	5.35442e+06	5.69316e+06	2.24603e+06
752.45972-6.269	474897	566816	680303	572335	521429	179768	471386	411825	509627	330169	361618	217160	439743	464640	1.04318e+06	738248	689025	630801	498109	531076	276770	582091	506760	474706	626408	648726	659885	671045	615248	581771	891015	755372	696724	1.1676e+06	329254	479581	1.21106e+06	501051	421887	411029	585075	609232	1.32677e+06	6.0628e+06	2.02044e+06	1.27107e+06	2.29354e+06	642346
818.61188-13.104	1.72191e+06	2041734	1.53329e+06	2.9192e+06	2.37775e+06	1.30826e+06	1.47119e+06	1.78875e+06	2.5057e+06	1.92919e+06	1.31411e+06	1.45634e+06	1.73923e+06	3.10767e+06	1.54724e+06	1.64385e+06	1.46608e+06	1.5193e+06	1.77762e+06	1.22062e+06	2.44021e+06	1.23666e+06	1.52809e+06	1.64014e+06	1.20057e+06	1.08054e+06	1.02052e+06	960508	1.26059e+06	1.44064e+06	1.48431e+06	2.62849e+06	2.35509e+06	1.66507e+06	1.56436e+06	1.55851e+06	1.9215e+06	2.08185e+06	2.11048e+06	1.6919e+06	1.28486e+06	1.3919e+06	2.79048e+06	7.79521e+06	4.08628e+06	2.08967e+06	3.80633e+06	2.42735e+06
812.54736-10.372	1.31497e+06	1317054	1.62863e+06	1.31054e+06	997394	990942	1.01306e+06	1.47582e+06	1.44732e+06	1.37082e+06	1.24731e+06	967615	2.03865e+06	1.96386e+06	1.04106e+06	1.64293e+06	1.42117e+06	1.26014e+06	1.55153e+06	1.10229e+06	730443	1.49718e+06	808292	1.55033e+06	561863	419635	348521	277406	632978	846320	481167	1.68402e+06	1.43917e+06	346982	801674	1.10254e+06	797572	353664	1.913e+06	635419	937660	777187	2.96206e+06	6.37484e+06	4.31882e+06	2.14027e+06	3811275	570776
846.70349-16.443	1.14114e+06	1.56906e+06	1.17322e+06	1.41937e+06	974288	838091	1.42356e+06	1.11295e+06	1.50776e+06	1.44058e+06	906346	1.10808e+06	1.40174e+06	1.74353e+06	1.5068e+06	927188	927962	1.04502e+06	851783	1.06385e+06	1.46257e+06	1.0323e+06	1.52135e+06	1.29758e+06	959345	921893	903167	884441	978070	1.03425e+06	1.34038e+06	1.75384e+06	1.39375e+06	1.42097e+06	1.16117e+06	1.16135e+06	1.35719e+06	1.20733e+06	1.64749e+06	1.25796e+06	1.31387e+06	1.28853e+06	3.31481e+06	7.14606e+06	5.01388e+06	2.06309e+06	2.50265e+06	1.21871e+06
844.59229-13.354	1.78959e+06	1114044	1.63549e+06	1.81571e+06	3.77009e+06	2.39134e+06	1.77656e+06	2.07343e+06	3.01367e+06	2.31288e+06	2.13162e+06	1.27822e+06	3.45344e+06	6.1887e+06	2.76035e+06	1.75951e+06	2.89365e+06	1.7861e+06	2.08256e+06	2.35788e+06	1316514	2.98444e+06	1.75618e+06	1.9376e+06	1.92305e+06	1.4824e+06	1.26207e+06	1.04175e+06	2.14338e+06	2.80435e+06	984699	1.75413e+06	5.566e+06	2.72036e+06	3.02529e+06	3059700	2.34645e+06	3.49808e+06	2.95114e+06	2.89844e+06	6.99082e+06	1.78266e+06	4.63398e+06	1.09932e+07	7.73432e+06	5.25915e+06	5.22974e+06	2.40971e+06
842.67206-12.613	767875	1.75609e+06	1.17928e+06	914381	1.13194e+06	1.00101e+06	1.53867e+06	1.53043e+06	867710	809798	674775	698391	1.2142e+06	1.0033e+06	1.14725e+06	838985	1.35519e+06	1.13893e+06	1.33097e+06	1.4056e+06	903586	794899	1.0834e+06	1.60833e+06	1.7487e+06	1.61325e+06	1.54553e+06	1.4778e+06	1.81643e+06	2.0196e+06	1.88963e+06	1.08102e+06	1.00427e+06	1.48443e+06	1.36194e+06	932448	831085	1.21974e+06	1.36565e+06	2.46487e+06	1.09395e+06	1.04877e+06	2.0117e+06	6.45321e+06	3.13827e+06	1.0996e+06	1957890	1.51847e+06
840.57697-11.757	313232	364293	252903	336918	715104	490951	231109	465612	413305	329704	257600	375143	355187	4.01143e+06	324466	416557	447460	430954	407151	332738	244182	298857	442966	337189	299168	258210	237731	217252	319647	381084	288405	331413	563789	363911	310973	442946	307222	659187	307046	412950	1.2808e+06	276849	628065	6.10343e+06	986110	684449	400405	709056
872.67816-7.51	376818	366239	176492	209980	397773	138390	911836	336709	269018	343089	387925	175174	351572	294647	600132	374500	236038	251433	1.13752e+06	201720	439561	173515	543172	899740	201617	234537	250998	267458	185156	135775	875859	459757	223939	656102	495425	464291	695973	148713	563748	1.1374e+06	655973	204692	1.17328e+06	6.08355e+06	1.7405e+06	578563	1.96685e+06	159726
870.64893-10.53	111437	478356	419895	170447	372707	341308	197624	260989	224036	351179	182393	146350	377175	517301	711926	164143	434511	202598	701277	124039	162680	198099	204635	585372	268113	168324	118429	68534.5	318008	467692	194091	241163	804415	397754	463756	586402	215677	402507	433011	290654	551973	427191	310363	6.34683e+06	553400	342045	439242	385129
890.59106-11.798	299887	234649	164052	191681	164545	112945	223357	239251	195096	123721	106448	137458	204407	257296	203703	336692	212680	170796	224413	129309	329955	182088	149921	168346	228124	214050	207014	199977	235160	256270	275999	709313	443849	238716	209925	210908	342689	538314	489249	572348	263522	346090	993947	6.39533e+06	1.2449e+06	932642	395154	643026
866.63129-12.555	444141	326546	323170	382957	519586	256637	716665	527675	480296	65801.9	166795	389383	475161	370971	95157.8	492049	79254.5	234422	695768	246437	1.11235e+06	262414	486856	298599	734405	977170	1.09855e+06	1.21993e+06	613023	248876	781572	722548	1.08251e+06	1.43975e+06	1.03483e+06	650012	745356	447900	563083	634480	593876	941748	1.78895e+06	6.09147e+06	3.0332e+06	684304	953047	715906
628.54309-16.997	662905	250048	255345	331970	214120	152388	221778	438022	781794	404320	614990	255858	701176	269141	783435	283731	971204	452888	536522	554039	544908	724611	1.10866e+06	641724	244605	236802	232900	228998	248507	260213	334164	682867	750760	638018	294435	319127	581530	267654	578804	646305	566409	470010	836275	6.18308e+06	1.12357e+06	607884	3.9843e+06	738611
726.67444-16.57	290393	247709	355366	199026	434913	156531	202804	406039	431006	412983	204843	237243	443090	601978	625905	452646	252163	144854	451069	212680	211296	690856	304993	646212	172479	160581	154632	148684	178428	196275	220652	411056	476335	280751	185710	403233	376262	329125	303496	364188	745859	278024	589650	5.96129e+06	1.05623e+06	493928	732157	417152
724.64594-20.7	304920	372279	397509	474589	309753	241066	327206	397167	368313	400961	344858	247053	367239	572715	424928	321288	384643	2.19324e+06	669897	409702	1.2324e+06	481383	664364	364832	363367	386908	398678	410448	351597	316287	431331	462086	397191	441389	391933	459983	269224	285721	512665	427659	375568	374096	780364	5.88228e+06	1.12388e+06	1.63009e+06	1.55837e+06	506156
754.61792-21.626	2.14098e+06	2.21015e+06	2.34243e+06	2.54742e+06	3.73019e+06	1.95722e+06	1.66967e+06	2.47341e+06	2.87754e+06	2.4723e+06	2.31749e+06	1.68538e+06	2.22297e+06	2.70918e+06	5.09409e+06	2.38308e+06	1.85344e+06	1.8716e+06	1.57098e+07	4.04455e+06	3.16408e+06	2.39705e+06	2.89025e+06	4.6067e+06	2.40045e+06	2.53355e+06	2.6001e+06	2.66665e+06	2.3339e+06	2.13426e+06	2.10896e+06	2.64887e+06	3.93219e+06	2.89199e+06	3.34884e+06	6.75111e+06	1.52077e+06	4.29992e+06	2.15582e+06	5.8751e+06	1.20188e+07	3.27874e+06	5.08505e+06	9.88583e+06	8.19659e+06	4.30628e+06	2.25954e+06	3.55124e+06
752.67291-21.264	1.06822e+06	1.13283e+06	1.22311e+06	1.75626e+06	1.15237e+06	408322	1.06852e+06	1.25257e+06	1.48009e+06	1.44782e+06	1.14645e+06	893960	1.22831e+06	2.49997e+06	2.51262e+06	494435	1.28959e+06	9.70702e+06	4.36307e+06	1.78308e+06	2628204	1.7357e+06	4.0216e+06	1.12619e+06	996972	977731	968110	958490	1.00659e+06	1.03545e+06	2.87602e+06	3.0807e+06	1.59732e+06	3.39548e+06	2.44938e+06	2.92509e+06	829765	941966	4.18341e+06	1.53699e+06	1.13406e+06	2.96294e+06	3.60736e+06	6.88579e+06	4.12602e+06	6.76323e+06	1.1726e+07	3.52511e+06
824.76715-22.385	6.84869e+06	3756996	7.57476e+06	1.13357e+07	3.97435e+06	4.78186e+06	3939912	6.93343e+06	7.0769e+06	4.65276e+06	5.35869e+06	4.1468e+06	5.59849e+06	1.19908e+07	7.17339e+06	6.24332e+06	8.19781e+06	2.7334e+07	1.12218e+07	1.0463e+07	8904708	8.02861e+06	1.18251e+07	7.18216e+06	6.78967e+06	6.79203e+06	6.79321e+06	6.79439e+06	6.78849e+06	6.78494e+06	8.23343e+06	7.36945e+06	1.03298e+07	1.08479e+07	8.14566e+06	1.05028e+07	5.06594e+06	3.82639e+06	1.09895e+07	9.65156e+06	7.29508e+06	9.15726e+06	1.74252e+07	1.43112e+07	2.3905e+07	2.28097e+07	4.5898e+07	1.13445e+07
822.75189-22.187	8.10281e+06	7.07735e+06	8.2308e+06	1.26997e+07	8.47807e+06	4.89947e+06	6.93551e+06	8.10883e+06	1.13612e+07	8.02808e+06	7.37451e+06	5.84304e+06	7.63466e+06	1.67135e+07	1.04747e+07	6.18999e+06	1.01358e+07	5.19676e+07	18677880	1.41159e+07	9.06673e+06	1.11492e+07	1.3645e+07	9.03759e+06	7.92448e+06	8.41018e+06	8.65303e+06	8.89588e+06	7.68164e+06	6.95309e+06	1.21338e+07	1.51638e+07	1.12582e+07	1.61585e+07	9.02997e+06	1.44077e+07	5.17063e+06	6.55151e+06	2.24583e+07	1.1779e+07	1.0396e+07	1.26614e+07	2.1323e+07	1.64731e+07	2.70278e+07	3.45562e+07	66843630	1.55776e+07
820.64783-21.942	4.55442e+06	4.80489e+06	4.65468e+06	8.94326e+06	4.58804e+06	3.18192e+06	4.20345e+06	4.7755e+06	7.61991e+06	5.04947e+06	5.10101e+06	3.43942e+06	4.57437e+06	7.87724e+06	6.43186e+06	3.77675e+06	5.6609e+06	2.94753e+07	9.16646e+06	7.02133e+06	6.29762e+06	6.15059e+06	7.80206e+06	9.11909e+06	4.63898e+06	4.5875e+06	4.56176e+06	4.53602e+06	4.66472e+06	4.74195e+06	6.23725e+06	7.42899e+06	6.74423e+06	8.22712e+06	6.06245e+06	8.08488e+06	3.00395e+06	4.24256e+06	1.15492e+07	6.39912e+06	6.05939e+06	6.63447e+06	1.11759e+07	1.15147e+07	1.44614e+07	1.75616e+07	3.34547e+07	7.71267e+06
852.72443-22.619	4.96794e+06	1.72506e+06	3.19952e+06	8.46988e+06	4.57836e+06	3.52197e+06	2.78725e+06	5.30029e+06	5.73859e+06	6.0788e+06	2.39542e+06	1.97597e+06	1.44314e+06	6.23024e+06	2.10436e+06	2.49688e+06	2.27397e+06	8.4845e+06	4.17333e+06	5.36569e+06	3.25029e+06	5.90817e+06	2.83871e+06	2.90226e+06	5.9913e+06	5.98537e+06	5.98241e+06	5.97944e+06	5.99427e+06	6.00316e+06	3.77765e+06	6.21338e+06	4.07197e+06	6.04818e+06	5.24691e+06	4.46761e+06	3.76627e+06	4.56306e+06	4.8644e+06	6.93084e+06	2.1272e+06	2.2455e+06	7.27774e+06	8.84073e+06	1.00657e+07	1.12482e+07	2.48173e+07	7.62683e+06
848.77332-22.245	2.6586e+07	2.55392e+07	2.37062e+07	2.62323e+07	4.32859e+07	2.52015e+07	15410961	2.94893e+07	3.04588e+07	4.03098e+07	1.88088e+07	1.55735e+07	3.72102e+07	4.72462e+07	3.49637e+07	3.82327e+07	3.0624e+07	5.42463e+07	7.2854e+07	3.49665e+07	17444421	1.4527e+08	2.3216e+07	8.67884e+07	2.87484e+07	2.43088e+07	2.2089e+07	1.98692e+07	3.09682e+07	3.76276e+07	2.45433e+07	2.59175e+07	3.54013e+07	2.84735e+07	45071080	5.18237e+07	1.696e+07	8.35254e+07	1.38237e+07	5.03968e+07	8.48402e+07	1.81548e+07	3.81282e+07	4.60891e+07	5.50446e+07	3.89503e+07	3.39518e+07	4.16687e+07
846.75085-22.008	1.67847e+07	1.61646e+07	1.0288e+07	2.06387e+07	3.64358e+07	1.8394e+07	1.20285e+07	2.61635e+07	1.82222e+07	2.30586e+07	1.28702e+07	1.13487e+07	2.71243e+07	3.40412e+07	2.31759e+07	3.69759e+07	2.79963e+07	5.58957e+07	4.15255e+07	2.75034e+07	11607228	2.11642e+07	1.63464e+07	3.42325e+07	2.35308e+07	1.8867e+07	1.65351e+07	1.42032e+07	2.58627e+07	3.28583e+07	1.64538e+07	1.71232e+07	2.18071e+07	2.3051e+07	2.87181e+07	3.6305e+07	1.29566e+07	7.68035e+07	8.02442e+06	3.68578e+07	5.12981e+07	1.19517e+07	3.25961e+07	3.50382e+07	45478134	3.03787e+07	2.85103e+07	2.73873e+07
844.73663-21.691	2.00025e+06	2.19039e+06	2.82957e+06	4.28324e+06	2.3303e+06	1.84501e+06	3222642	2.41343e+06	3.46139e+06	2.26026e+06	2.36035e+06	2.03567e+06	2.7992e+06	3.35486e+06	3.65245e+06	2.88558e+06	6.13303e+06	5.76811e+06	3.98868e+06	2.02122e+06	1.06295e+07	2.81734e+06	4.9048e+06	2.55254e+06	2.01088e+06	1.76808e+06	1.64668e+06	1.52528e+06	2.13228e+06	2.49648e+06	2.79296e+06	2.89224e+06	3.1515e+06	2.28377e+06	3.3248e+06	4.96561e+06	2.01374e+06	1.82661e+06	3.66992e+06	3.05378e+06	3.57502e+06	2.62149e+06	5.89203e+06	7.6143e+06	8.44218e+06	5.20167e+06	9.36615e+06	4.27653e+06
842.72076-21.372	1.31448e+06	1.15654e+06	1.67428e+06	2.82386e+06	1.76124e+06	1.07932e+06	2.22592e+06	1.61063e+06	2.33342e+06	1.43308e+06	1.13721e+06	1.36726e+06	1.94863e+06	1.91705e+06	2.70306e+06	1.9463e+06	4.76176e+06	2.03989e+06	2.30837e+06	1.12167e+06	7.29461e+06	1.57543e+06	2.68079e+06	1.42739e+06	1.30962e+06	1.13969e+06	1.05473e+06	969765	1.39458e+06	1.64947e+06	2.00046e+06	2.02233e+06	1.89339e+06	1.32696e+06	2.37623e+06	3.42557e+06	1.52184e+06	1.17259e+06	2.67934e+06	2.28222e+06	1.89677e+06	1492905	3.908e+06	6.84354e+06	5656381	2.88081e+06	4.97467e+06	2.73012e+06
840.70514-20.989	867346	922250	792575	574838	1.10493e+06	1.24719e+06	801052	565478	1.28888e+06	799680	767797	535958	779878	1.26143e+06	1.23924e+06	1.04385e+06	1.70534e+06	994438	2.82046e+06	1.08988e+06	976377	434346	6.76093e+06	768919	1.0056e+06	1.27607e+06	1.4113e+06	1.54653e+06	870364	464662	1.2066e+06	523333	1.24482e+06	1.05571e+06	1.22809e+06	954096	445831	1.64595e+06	2.34649e+06	536868	1.12238e+06	825481	2.11046e+06	6.54738e+06	3.41136e+06	724928	1.09041e+06	1.43195e+06
864.75909-21.299	3.53603e+06	3872892	2.49046e+06	5.88611e+06	3.12455e+06	1.50001e+06	2.17549e+06	3.73629e+06	4.54664e+06	4.75436e+06	1.96712e+06	1.64952e+06	2.07803e+06	5.60294e+06	2.17841e+06	1.65541e+06	3.57546e+06	1.13185e+07	4.3488e+06	3.21295e+06	4949187	4.07412e+06	5.87674e+06	2.43393e+06	2.30133e+06	2.34323e+06	2.36419e+06	2.38514e+06	2.28037e+06	2.21751e+06	5.14257e+06	5.33253e+06	5.47134e+06	3.77641e+06	2.56144e+06	5.17585e+06	1.57774e+06	2.52059e+06	6.45297e+06	5.42616e+06	2.13158e+06	4.88051e+06	6.38239e+06	9.54379e+06	8.25371e+06	9.38515e+06	1.96872e+07	5.08189e+06
852.70483-20.82	869708	604328	1.18833e+06	1.78319e+06	1.11562e+06	701858	1.3394e+06	1.0428e+06	1.3066e+06	896136	840695	913668	1.17241e+06	1.07165e+06	1.73452e+06	1.37228e+06	4.22968e+06	992782	1.38803e+06	691841	1.42306e+06	903143	1.27485e+06	811606	714680	606572	552518	498464	768735	930897	1327698	1.55776e+06	1.78479e+06	1.0003e+06	1.76522e+06	3.38014e+06	1.03793e+06	639249	2.07579e+06	1.84882e+06	1.12388e+06	1.32755e+06	2.66017e+06	6.40492e+06	3.7641e+06	2.11674e+06	3.87384e+06	2.33097e+06
880.83044-22.928	1.98197e+06	3923004	3.76711e+06	1.09988e+06	3.09073e+06	2.3171e+06	2.97835e+06	2.06054e+06	3.51325e+06	4.06945e+06	3.52569e+06	1.15993e+06	1.45929e+06	1.59267e+06	4.1073e+06	1.89327e+06	1.69082e+06	936564	2.22133e+06	1.79471e+06	2.03048e+06	1.20434e+06	2.14302e+06	1.39699e+06	4.03352e+06	4.15094e+06	4.20965e+06	4.26836e+06	3.97481e+06	3.79868e+06	5.82341e+06	1.94318e+06	2.64193e+06	2.1493e+06	4.58007e+06	3.1543e+06	2.88992e+06	2.91234e+06	3.16247e+06	2.52868e+06	7.32096e+06	1.98266e+06	3.27206e+06	8.28557e+06	5.08161e+06	3.09294e+06	2.04934e+06	2.74769e+06
878.81421-22.618	5.69088e+06	7132362	4.43342e+06	5.63498e+06	4.58936e+06	2.18004e+06	3359418	1.71665e+06	2.42021e+06	6.32458e+06	2.82973e+06	1.29617e+06	3.7945e+06	7.51447e+06	3.16922e+06	1.67515e+06	5.33716e+06	9.46748e+06	6.29912e+06	6.25418e+06	8.03312e+06	4.04279e+06	11939600	3.05743e+06	7.30407e+06	6.46431e+06	6.04443e+06	5.62455e+06	7.72395e+06	8.98359e+06	5713200	6.51966e+06	4.96947e+06	5.74632e+06	4.37464e+06	6.62087e+06	2.54626e+06	2841300	6.75768e+06	3.4906e+06	4.54025e+06	3.01315e+06	1.13781e+07	1.12695e+07	1.49654e+07	1.24228e+07	31662870	7.33309e+06
876.80225-22.433	1.38723e+07	13720680	1.64723e+07	1.56448e+07	2.01979e+07	8.06097e+06	7.82881e+06	1.34272e+07	1.06609e+07	15857775	8.06635e+06	7.88168e+06	1.24501e+07	1.95958e+07	1.64261e+07	2.23754e+07	1.20966e+07	3.34008e+07	25215600	1.01758e+07	10723566	1.0434e+08	1.40089e+07	3.61292e+07	1.0625e+07	1.03382e+07	1.01948e+07	1.00513e+07	1.07684e+07	1.11986e+07	1.78324e+07	1.26019e+07	1.41988e+07	1.45647e+07	1.18581e+07	2.23489e+07	9565150	1.90692e+07	5.82881e+06	1.30978e+07	5.66461e+07	1.03412e+07	1.71458e+07	2.7157e+07	2.74339e+07	2.86304e+07	1.43452e+07	1.22025e+07
872.68085-11.572	556967	662846	518550	639868	757779	331352	394877	580313	917007	401910	372401	347656	540433	516991	716689	631292	719082	384803	749654	528373	459670	680995	608193	771065	649026	679491	694724	709956	633794	588096	682587	722646	746647	705056	576377	662234	554988	791475	594649	827720	978701	442861	1.23669e+06	6.18748e+06	1.97399e+06	539086	931100	637751
864.70532-20.518	320207	326871	440286	591363	318704	263575	416923	327979	479189	321397	292428	249623	493316	378745	706809	458723	836662	471190	403457	303994	2644392	335431	879166	291897	306127	271658	254423	237188	323362	375066	579465	442390	408769	295566	454805	500131	419652	370937	499095	577023	406063	381805	931358	5.83469e+06	1.39913e+06	635955	1.24347e+06	484970
894.84247-22.939	3.15483e+06	1.45044e+06	3.75072e+06	5.47611e+06	1.06879e+06	2.43553e+06	1.3315e+06	1.36703e+06	3.44104e+06	4.4554e+06	2.62423e+06	1.9135e+06	1.12501e+06	2.83239e+06	2.07227e+06	1.09145e+06	1.72867e+06	4.23806e+06	3.19879e+06	2.17719e+06	3.64041e+06	3.64794e+06	1.78484e+06	3.73618e+06	2.85715e+06	2.30056e+06	2.02227e+06	1.74398e+06	3.13544e+06	3.97031e+06	1.6006e+06	2.7174e+06	4697295	2.74141e+06	4.1718e+06	4.36504e+06	2.14491e+06	3.11715e+06	3.29925e+06	5.13044e+06	1.27071e+06	3.38892e+06	5.57529e+06	9.11952e+06	8.63191e+06	4.11319e+06	7.70063e+06	5.1025e+06
892.83313-22.555	600338	582394	788375	777524	1.22485e+06	312117	613133	841498	1.3599e+06	1.71295e+06	686264	457131	622099	1.57818e+06	680893	1257775	610541	1.74648e+06	1.64526e+06	628474	495418	1.26971e+06	807779	1.43251e+06	696544	737141	757440	777738	676246	615350	1650894	707513	917555	827493	547970	801668	503112	898178	364975	627687	1.94325e+06	676277	1.13649e+06	6.36931e+06	1.72367e+06	1.08218e+06	692035	1.11112e+06
890.80988-22.506	1.83456e+06	1.17838e+06	3.7295e+06	3.32789e+06	879916	1.29046e+06	1.54945e+06	2.87732e+06	2.45422e+06	1.37911e+06	1.59509e+06	1.90985e+06	2.05447e+06	1.99679e+06	1.60469e+06	1.49435e+06	7.15894e+06	6.05253e+06	2.68682e+06	1.8278e+06	4356798	4.09196e+06	4.54368e+06	1.87643e+06	1.90992e+06	1.79758e+06	1.7414e+06	1.68523e+06	1.96609e+06	2.1346e+06	2.10906e+06	2.22036e+06	3.04116e+06	2.21465e+06	2.23695e+06	3.52604e+06	1.29214e+06	756357	2.1562e+06	2.61802e+06	2.5489e+06	3.26095e+06	3.34046e+06	7.48754e+06	4.63541e+06	4.45702e+06	1.2209e+07	2.54594e+06
880.73541-21.302	968590	1283910	1.44523e+06	1.94895e+06	1.43157e+06	953626	1.85326e+06	1.55321e+06	1.75594e+06	1.30726e+06	1.24227e+06	1.04788e+06	1.56002e+06	1.87002e+06	1.60991e+06	1.86724e+06	3.28579e+06	1.20071e+06	1.69365e+06	1.0382e+06	2080074	1.11663e+06	1.57261e+06	1.09854e+06	1.27464e+06	1.19325e+06	1.15256e+06	1.11186e+06	1.31534e+06	1.43743e+06	2.0073e+06	1.99423e+06	1.75684e+06	1.45574e+06	1.68198e+06	2.24939e+06	1.26388e+06	1.02024e+06	1.85643e+06	1.90149e+06	1.33369e+06	1.55196e+06	3.13115e+06	6.64897e+06	4.77219e+06	2.24437e+06	4.0273e+06	1.99196e+06
878.71942-20.83	1.08741e+07	459693	697351	1.06387e+06	630904	396479	807890	607598	694140	621115	557880	427729	712543	844371	971707	979529	2.26073e+06	564644	756439	491563	748818	480891	751887	523208	510464	453546	425088	396629	538922	624298	959193	964786	804529	566784	858552	1325370	556918	484207	1.00837e+06	948910	578718	680498	1.56948e+06	5.99464e+06	2.34964e+06	1.34065e+06	2.73419e+06	1.13543e+06
904.83191-22.55	2.35521e+06	5.35619e+06	6.64957e+06	6.66561e+06	4.78292e+06	3.72096e+06	4.04238e+06	3.52879e+06	5.26885e+06	3.9522e+06	4.56888e+06	2.83302e+06	2.74219e+06	3.10122e+06	9.27704e+06	5355900	1.09635e+07	3.05633e+06	4.21519e+06	5.56129e+06	28380324	4.67844e+06	7.96287e+06	3.65807e+06	3.94988e+06	3.77185e+06	3.68283e+06	3.59381e+06	4.03889e+06	4.30594e+06	5.61476e+06	4.47053e+06	8449800	5.00379e+06	3.90505e+06	2.71884e+06	3557725	4.54111e+06	4.61826e+06	5.87285e+06	8.7426e+06	3.23199e+06	7.99652e+06	1.08902e+07	1.24828e+07	5.4552e+06	1.50048e+07	3.11895e+06
902.81805-22.486	1.56321e+07	1.63165e+07	1.35836e+07	1.71714e+07	1.57837e+07	1.56716e+07	9710745	9.12471e+06	1.46506e+07	1.14661e+07	1.0671e+07	7.51714e+06	1.11947e+07	1.37806e+07	1.68558e+07	1.56084e+07	2.43379e+07	9.95292e+06	3.24652e+07	1.4186e+07	7.73628e+06	1.08321e+07	8.98053e+07	1.57076e+07	1.37852e+07	1.63975e+07	1.77036e+07	1.90097e+07	1.24791e+07	8.56078e+06	1.24562e+07	1.49671e+07	1.81348e+07	1.36355e+07	1.34034e+07	17550120	8.02857e+06	29258925	1.8546e+07	7.87199e+06	1.32304e+07	1.43767e+07	2.90379e+07	1.48061e+07	4.89468e+07	1.626e+07	1.51729e+07	1.51209e+07
900.8053-22.251	1.66494e+07	1.57163e+07	1.38976e+07	1.76309e+07	2.07613e+07	1.93534e+07	1.00641e+07	1.23338e+07	1.49274e+07	1.01602e+07	9.98578e+06	6.5155e+06	1.08238e+07	1.54265e+07	2.2445e+07	1.65861e+07	2.02831e+07	1.13242e+07	3.05705e+07	1.53169e+07	9.15674e+06	9.49143e+06	1.37176e+08	1.32635e+07	1.47187e+07	1.93358e+07	2.16444e+07	2.39529e+07	1.24102e+07	5.48454e+06	1.11043e+07	1.31269e+07	1.68029e+07	1.37212e+07	1.14976e+07	1.8154e+07	8.80037e+06	2.5896e+07	2.49339e+07	5.81307e+06	1.44873e+07	1.03208e+07	3.09961e+07	1.5937e+07	5.29261e+07	1.13344e+07	1.5797e+07	1.59366e+07
898.78784-22.001	2.92985e+07	2.88553e+07	3.20174e+07	3.68209e+07	4.58541e+07	2.11742e+07	24528954	2.74751e+07	2.72909e+07	2.5898e+07	1.45298e+07	1.82546e+07	2.37581e+07	3.91729e+07	3.5659e+07	2.5789e+07	3.45617e+07	3.35414e+07	3.80949e+07	2.29183e+07	19385733	2.91849e+08	2.40569e+07	6.32386e+07	1.68997e+07	1.46918e+07	1.35879e+07	1.24839e+07	1.80036e+07	2.13154e+07	30652344	3.30325e+07	4.29073e+07	2.41668e+07	2.85568e+07	3.27688e+07	2.03051e+07	5.13733e+07	9.90108e+06	3.4054e+07	7.43115e+07	1.71455e+07	4.73103e+07	5.45558e+07	7.46521e+07	4.41867e+07	3.97429e+07	3.34177e+07
896.76965-21.758	5.53667e+07	9.0309e+07	8.35379e+07	8.83111e+07	7.81214e+07	5.37332e+07	65632872	8.9884e+07	8.18304e+07	5.81528e+07	6.32083e+07	3.94822e+07	7.77209e+07	9.9997e+07	7.12426e+07	9.73804e+07	1.21264e+08	6.83715e+07	8.61339e+07	4.91563e+07	552696576	6.68233e+07	1.3466e+08	7.48741e+07	6.40507e+07	5.36709e+07	4.84809e+07	4.3291e+07	6.92406e+07	8.48104e+07	1.2581e+08	1.18914e+08	6.93911e+07	6.27052e+07	7.4512e+07	1.17939e+08	5.99116e+07	8.60721e+07	1.02784e+08	1.05978e+08	9.41238e+07	8.73058e+07	1.77483e+08	8.42483e+07	2.60965e+08	1.19459e+08	213364515	1.71088e+08
894.75397-21.454	1.05824e+08	9.61634e+07	8.72752e+07	9.07764e+07	1.3488e+08	142979850	99343428	1.07844e+08	1.13958e+08	1.14861e+08	8.56241e+07	5.51258e+07	1.11033e+08	1.27359e+08	1.59387e+08	1.27358e+08	1.62016e+08	1.25494e+08	2.10023e+08	1.38495e+08	111505500	7.06227e+07	3.11453e+08	1.10207e+08	114850569	1.43e+08	1.57075e+08	1.7115e+08	1.00776e+08	5.85511e+07	140413152	1.26507e+08	1.89559e+08	1.8657e+08	1.61558e+08	1.54692e+08	1.02437e+08	246488600	2.41388e+08	1.19014e+08	1.57077e+08	1.1525e+08	3.68236e+08	1.3127e+08	5.79376e+08	1.47411e+08	161069835	190853831
892.73914-21.112	7.83877e+07	8.5531e+07	50436000	1.15844e+08	1.6973e+08	7.76191e+07	65914668	9.76777e+07	8.5622e+07	9.03864e+07	4.98464e+07	6.57652e+07	7.52821e+07	1.43569e+08	9.8135e+07	136204400	1.57008e+08	1.68514e+08	1.27946e+08	1.06226e+08	53059476	9.79645e+07	7.83424e+07	1.05743e+08	9.44369e+07	7.56724e+07	6.62902e+07	5.69079e+07	103819205	1.31966e+08	1.06209e+08	1.26941e+08	1.71134e+08	1.04955e+08	1.59539e+08	1.73349e+08	8.56086e+07	2.34736e+08	7.34234e+07	1.65257e+08	2.67653e+08	74654760	1.90137e+08	1.86576e+08	2.86703e+08	1.59117e+08	163836645	1.56716e+08
890.72351-20.634	3.83145e+07	3.69614e+07	3.15791e+07	1.68136e+07	5.89338e+07	5.7874e+07	32569632	2.42388e+07	3.94995e+07	3.10693e+07	2.55294e+07	1.95016e+07	3.7287e+07	3.50706e+07	5.88842e+07	4.52927e+07	7.39823e+07	5.30827e+07	1.21414e+08	3.78171e+07	37071870	1.82351e+07	2.84859e+07	3.49211e+07	3.31699e+07	4.46214e+07	5.03471e+07	5.60729e+07	2.74442e+07	1.0267e+07	51213072	3.03374e+07	7.63425e+07	6.26336e+07	7.2814e+07	6.3109e+07	2.77702e+07	9.98157e+07	1.40588e+08	2.20743e+07	5.7927e+07	3.5104e+07	1.11287e+08	5.58988e+07	1.81555e+08	3.42085e+07	5.49951e+07	8.52771e+07
922.87433-23.23	2.64714e+06	685476	1.26918e+06	4.66435e+06	2.19427e+06	741676	2.68477e+06	2.58788e+06	2.78426e+06	3.43513e+06	1.98647e+06	616236	1.40622e+06	3.17975e+06	2.36586e+06	891712	1.44109e+06	4.26617e+06	3.41608e+06	2.95452e+06	2073318	2.85154e+06	2.7455e+06	1.34924e+06	1.17767e+06	1.31243e+06	1.37981e+06	1.44718e+06	1.11029e+06	908161	3.24804e+06	3.15512e+06	3.90814e+06	3.05268e+06	3.41126e+06	3483000	1.6986e+06	2.54826e+06	3.79285e+06	990288	1.08793e+06	2.7504e+06	3.76196e+06	8.40561e+06	4.81048e+06	4.92394e+06	8.82447e+06	3.99985e+06
920.7821-22.987	2.01413e+06	2.26573e+06	2.50131e+06	3.84522e+06	1.63942e+06	476743	2154870	2.03814e+06	2.60309e+06	3.22945e+06	1.68314e+06	681330	790857	2.47831e+06	1.83551e+06	817409	1.60893e+06	4.31705e+06	2.86912e+06	2.35181e+06	2.64195e+06	1.28511e+06	2.64195e+06	1.28616e+06	1.89979e+06	2.40367e+06	2.65561e+06	2.90755e+06	1.64785e+06	892036	2.44484e+06	2.78816e+06	3.05567e+06	2.31503e+06	3.06613e+06	2.79235e+06	1.33686e+06	2.06854e+06	2.86496e+06	3.37798e+06	1.86192e+06	2.17236e+06	3.34043e+06	7.68211e+06	5.34515e+06	2.81659e+06	7.86786e+06	3.31723e+06
918.72406-21.737	715370	1.57632e+06	1.31063e+06	1.36296e+06	1.00546e+06	634475	1051083	1.23589e+06	1.13459e+06	914058	920254	640142	1.50118e+06	1.2842e+06	1.42236e+06	1599975	1.37365e+06	986219	1.00869e+06	1.04957e+06	3818328	1.25211e+06	2.07463e+06	1.15444e+06	918396	969787	995482	1.02118e+06	892700	815614	1.37731e+06	914651	816638	727881	900636	815223	792963	998602	938360	995426	915810	1.37799e+06	2.08722e+06	6.24985e+06	3.20516e+06	1.09249e+06	2.2997e+06	1.14489e+06
928.83026-22.494	4.32219e+06	3.90652e+06	4.24999e+06	5.18344e+06	3.00496e+06	2.17135e+06	2.79581e+06	4.75599e+06	3.8781e+06	3.77869e+06	2.75127e+06	2.32503e+06	4.13513e+06	5.00016e+06	8.51272e+06	4.6374e+06	7.35944e+06	4.90013e+06	4.64203e+06	2.27174e+06	47881302	2.76481e+06	7.12081e+06	4.48817e+06	3.21203e+06	2.27145e+06	1.80116e+06	1.33087e+06	3.68232e+06	5.09319e+06	5841930	3.81262e+06	3.73562e+06	3.34189e+06	4.43267e+06	8074860	3.78858e+06	2.27637e+06	5.30167e+06	4.56171e+06	5.18704e+06	4.70288e+06	8.54865e+06	9.26806e+06	1.16249e+07	6.02649e+06	1.0803e+07	6.78699e+06
924.80188-22.09	1.70612e+07	44494032	2.1728e+07	2.38282e+07	1.91696e+07	1.09835e+07	1.39022e+07	5.22223e+07	1.28904e+07	2.44612e+07	17644700	1.5706e+07	2.44064e+07	4.99493e+07	3.21344e+07	44600650	3.82547e+07	1.46176e+07	1.89695e+07	1.76435e+07	22973805	1.24807e+07	2.01852e+07	3.80505e+07	3.73988e+07	4.54416e+07	4.9463e+07	5.34844e+07	3.33774e+07	2.13133e+07	5.05745e+07	1.82207e+07	1.74211e+07	4.00958e+07	3.15554e+07	4.73177e+07	2.07761e+07	1.89787e+07	2.12602e+07	3.70492e+07	4.19512e+07	4.28691e+07	6.48298e+07	2.17278e+07	9.85544e+07	3.22604e+07	4.04418e+07	5.61751e+07
922.7785-21.821	5.11211e+06	5005332	2.97616e+06	8.14985e+06	1.11046e+07	4.99632e+06	3.63354e+06	6.99568e+06	5.60946e+06	6.64997e+06	4.28708e+06	4.25482e+06	5.67977e+06	9.70859e+06	8.0171e+06	1.0162e+07	1.10529e+07	1.12909e+07	7.31898e+06	6.29072e+06	3.755e+06	1.06856e+07	6.24041e+06	9.97228e+06	6.83699e+06	5.52517e+06	4.86926e+06	4.21335e+06	7.4929e+06	9.46062e+06	5.65792e+06	9.86072e+06	1.03011e+07	6.38945e+06	7.13927e+06	8.97735e+06	5.95943e+06	1.97531e+07	2.93467e+06	1.0996e+07	17652509	2.71797e+06	1.19215e+07	1.58635e+07	1.72663e+07	1.35609e+07	1.11491e+07	1.21774e+07
920.76636-21.523	1.6199e+06	2.14653e+06	2.52275e+06	3.324e+06	2.50329e+06	1.3817e+06	2357847	2.27434e+06	2.52425e+06	1.98274e+06	1.92995e+06	1.5272e+06	3.03601e+06	2.37735e+06	4.3368e+06	3.13744e+06	5.96525e+06	2.1749e+06	3.32636e+06	1.45151e+06	5669499	1.97459e+06	4.16502e+06	2.05869e+06	2.26999e+06	2.19895e+06	2.16343e+06	2.12791e+06	2.30551e+06	2.41207e+06	3.63152e+06	3.12058e+06	3.06185e+06	2.09014e+06	3.83777e+06	4.9581e+06	2.42411e+06	1.48946e+06	3.59163e+06	3.83067e+06	3.55862e+06	2.93056e+06	5.80792e+06	7.5037e+06	8.52784e+06	4.77289e+06	6.55006e+06	3.64762e+06
918.74982-21.183	447291	323447	565513	1.19159e+06	724838	442264	651866	584845	703643	572201	401483	449709	840373	710400	1.20357e+06	702403	1.72131e+06	587152	865391	375677	336919	387287	1.27765e+06	290600	384491	304666	264753	224841	424404	544141	1.04888e+06	1.01579e+06	1.00045e+06	604739	947749	1.42845e+06	823097	260762	1.04177e+06	1.20459e+06	582091	984663	1.84215e+06	6.13425e+06	2.69277e+06	1.45774e+06	3.08562e+06	906402
976.64337-7.339	336602	399066	414424	372158	338458	316593	423051	538779	174253	317863	388036	470655	433217	520713	443046	471002	296574	525778	491401	397528	535182	339442	437420	424110	303860	647826	247470	282665	355628	308456	417936	504015	414938	409875	500290	506032	472453	127522	433883	526413	347151	350376	585135	426975	509604	623618	780495	417160
316.21512-2.382	681625	1259106	217460	226213	241196	1080317	940526	577321	2762126	301337	673527	815799	1332220	202511	1619298	213352	697677	230921	209794	866821	487066	657168	672780	309301	200599	1461928	530024	624553	561262	625483	349785	527838	445625	585599	545095	1257305	1262750	938229	1141272	632599	375555	5116511	1192650	1412946	1753092	178518	2119344	1742621
314.21329-1.497	1228209	1108518	1160857	1846230	1133539	998716	1858613	2576995	1687434	2034821	2215069	1431074	1792640	991231	877665	1365073	546865	998613	1287318	827033	881444	866075	915502	1078960	544669	739862	625382	300686	925565	594124	831811	1865398	1088314	872410	880538	1014339	498909	867430	1206181	1070860	641400	844383	1307350	1344848	780332	1187296	1024851	1076908
312.24777-2.119	22712	144819	44594	151842	144958	161227	197945	154277	59575	172393	80852	131429	20621	223989	153272	64793	96927	184218	20543	107941	30852	301520	25234	180695	168615	63867	74733	180725	53922	72824	74294	51764	100507	115656	71038	84720	26972	33642	60355	34522	53389	145855	68947	70571	39797	231115	134829	68419
328.22754-1.678	252249	673581	50075	41041	111236	52054	404230	57640	297975	50769	58804	962776	153877	55060	49454	45963	38405	45126	44341	332393	172177	289188	58075	411639	41096	605039	451001	431924	47358	277377	271910	326418	313651	890705	560959	481076	106284	520721	186051	288535	338641	354204	239017	566649	524526	505679	133096	152093
358.30472-6.7	374275	306604	186411	272120	350548	378786	201138	289252	291407	259031	217231	237187	168137	235129	248739	350045	268047	436641	342450	350103	239505	389243	259957	280498	492266	321515	493539	607619	639012	352000	369969	604582	519540	363025	379465	500173	405961	613011	444454	355706	535926	571386	318848	426653	434608	322199	147154	360411
356.27899-2.171	1378420	1519606	1597409	2063470	1612318	1476979	1781791	1852267	1963938	1748346	1521008	1618594	2051051	1166033	1645212	1669589	1923178	1617106	1623133	1332295	1291064	1615735	1741807	1529905	0	1711089	1231356	1583379	1507725	1546367	1594843	1548208	1584881	1523199	1497992	1631729	1383200	1698222	1478618	1499197	1693162	1598932	1468155	1436138	1587228	1470850	1803168	1530252
366.18137-1.45	207422	207832	244271	226997	229801	223251	280403	158758	185797	221597	178815	77272	299340	287564	252231	212852	258701	166525	135503	188909	470300	134323	341436	105629	307614	421793	195137	172571	179240	261730	291881	239940	147830	215936	148359	295890	252290	353869	283720	294783	266197	310195	289986	284361	566442	238387	272643	194071
384.31158-9.374	941309	921554	853615	551971	1000010	809217	956971	898854	750643	735668	775374	926216	844100	747324	880902	715524	791703	1053501	868328	708838	771702	737998	856734	828006	927065	1010019	1009975	1242918	956157	1009866	1286253	918164	1006355	1115457	1039503	1107783	1141008	1101947	884305	1156840	1058746	1114114	1041992	1188990	945727	833535	972589	991737
382.29672-5.526	325058	317132	438192	214131	140797	196148	792842	816524	163844	178818	480593	243655	220285	449755	222575	583422	286445	346551	243613	222764	191609	211890	469838	375701	235439	284793	300919	149476	151505	417909	414476	355105	542839	300476	265287	360536	411014	392854	372856	266500	102628	93931	364696	421631	286567	256199	447464	235606
380.29709-5.585	1146522	1213676	1873195	902724	854644	1593816	1756467	1349828	1243779	1528971	1874491	1786613	1220171	783616	1235237	1332628	851512	1095142	974794	1569686	1301740	1360758	1954510	1635085	821192	821647	897701	1275476	856929	1267162	982757	998369	778790	930710	741835	853782	912667	1235873	872072	800067	686140	530607	959934	1021426	555526	950912	968965	1219362
400.33966-10.424	608628	611226	627988	243490	245024	342920	383429	226136	158462	348945	493970	197704	168729	222503	338486	195803	181609	271547	196194	187394	294606	322277	243719	193076	0	264818	208346	204700	351587	440114	225885	163231	462132	457579	210363	237829	302275	301640	447589	490895	204929	357710	257108	392196	451678	221441	223766	267946
392.28143-2.647	5727084	8955147	8451368	5102299	8147794	8376280	8478492	3936610	4056032	3910037	9260988	5714254	6132067	3190745	6247371	4736830	6584144	6778426	4544258	5200356	4812626	4782824	3871210	5040356	9257257	7303567	12092923	10176703	9299625	7622822	5737002	7735067	8902613	9494041	5914131	10104287	7595162	9488237	4708067	10687373	9621869	7758355	6049814	7555338	4026595	6727558	4151194	8440328
414.37949-7.626	851648	393054	274637	417712	238695	155692	626719	751821	375002	312797	467648	478289	650099	774048	245907	492801	338003	540765	316702	324769	553228	583976	377684	444908	210589	471474	351954	370826	544994	1494558	1133838	1288817	1076492	946807	600902	1094350	587815	633620	842278	2116514	477181	429579	1353890	1474550	1705378	2394329	3814405	1185564
412.36087-11.563	1302733	1643748	1337776	1148957	624751	637517	2634337	3568200	1588417	785162	1767122	1702272	1838581	2191516	1061204	1781336	3605784	1326820	1123654	1196742	2359176	3496694	1530523	1804155	455094	1078776	887761	1226038	1445544	1102042	1538106	1526943	1825113	2013650	1846097	1279512	1655618	707357	1540376	1374738	1122524	902442	1317325	1392143	1533407	1767698	2240976	1193328
410.32855-7.256	392784	323697	432084	517734	666388	485169	566483	603363	558491	452306	769775	478700	490581	498633	696296	502347	250212	253279	412575	323984	580733	399487	584342	598466	0	308686	366903	305936	374030	379157	467776	526896	376351	371285	457780	171761	340142	301432	485524	362922	322872	432686	316730	379282	386264	329110	495231	200739
428.33588-2.068	4751712	4526208	5267440	5119984	4729897	4583154	4446966	4725626	4757273	4757046	5282586	4866664	4056513	1907630	5438430	4857344	4967584	5294226	4772922	4632164	4438232	4472516	5293973	4754644	5145442	5350966	4688988	5002567	5018604	4977788	5274572	4806363	4555605	4853594	4846684	4780522	4994397	4353768	4604742	4751180	4814392	4608930	4196361	5078352	5428116	5011379	4834758	4776298
418.31833-10.405	490808	641352	627997	809100	608081	336493	507516	532411	392872	545975	422265	314078	281916	336103	329460	317158	415370	552544	406731	383333	339403	438110	677452	452321	654900	678406	639966	761759	795150	571178	512094	799238	645193	561365	713944	563704	937456	401111	506759	526379	694115	469006	382742	760816	381904	324164	559180	662936
442.39444-5.711	2150044	1986293	1882952	2843162	1506063	2252927	3452568	1806776	2203007	1449230	2108304	2485090	5181695	2514104	2331882	1651651	1314652	2945769	2360302	2399414	2433531	1694477	3448576	2099820	819990	1964759	2087451	1780741	1973636	2404937	2455262	3064878	2225591	3091525	3252463	3095066	2427529	1754939	3248483	2384268	1518238	2609203	3575226	2712083	3033022	3273687	5051706	2735182
438.36096-9.731	390868	519460	521260	323146	304901	408807	462639	492042	343810	327929	455562	423977	335404	438865	378417	341384	188723	528629	386703	789096	477767	371850	436848	426857	284629	764360	428542	678254	412419	479886	671844	418206	418597	669720	411852	366612	442600	434037	557207	700079	310277	540148	326297	598101	1068808	676730	355760	654694
436.34149-6.95	5800310	4559648	3051413	3076028	2809523	2821599	3961781	3537887	1252080	4703530	3946818	4209170	3356883	2147569	2601878	2043376	2423923	3798239	3088962	3586486	3960578	4435351	4245728	3020708	0	1377374	2034361	1411444	1464378	2468433	3081799	1149699	3186080	3033209	1433652	1406075	2382199	2449172	4705526	2463148	2194280	1431423	2387243	2342982	3297028	1157904	1913966	2414188
434.32867-8.679	207314	277315	480035	541549	263590	310633	319965	702748	651591	263029	497887	325838	543629	267882	342925	496182	691885	644371	484599	504850	284528	772372	360904	539218	592336	375095	381062	426468	328628	648434	786543	360022	584051	402627	629104	382340	556576	311061	307472	371443	314915	333221	697836	795372	526567	637933	682991	397345
456.40268-7.449	1698062	1930747	1508074	1389160	1413703	1476040	2476238	1510300	1939328	1823629	2336022	1451179	1441203	1398324	1696634	2054317	1544236	1676216	1742355	1381523	1420372	2155136	2074408	1454568	1485923	1668860	1666332	1935689	1627081	1558385	2185114	1819053	1642432	1756543	1624222	1790009	1785534	2108157	1953988	2437596	1919309	1854636	1758050	1871837	1576660	1614586	1751391	1557506
450.36194-9.812	676393	894006	591768	1419249	587746	569679	965535	486352	624266	606770	459533	358296	458388	642018	598050	435199	1151113	983362	946315	746088	684300	1125788	1159044	967595	2125412	1129084	1061698	1752540	988049	753793	602578	641797	986506	785126	742195	751473	1315860	2296365	1010965	1357697	873027	1159480	788327	842736	843377	745176	665840	760632
448.34192-5.772	456897	1052110	716000	630642	520341	281268	232310	1138180	389586	622086	649925	401446	481314	959486	762752	806473	736975	510331	365595	206113	230510	210296	482742	892142	954902	292548	1411886	753310	458307	545192	1208133	615038	583937	415068	1569188	1057264	1079389	337579	547256	677536	585049	266787	676425	366912	390202	800360	625959	1294600
446.32199-8.495	1896159	3214344	2373325	3012985	1962592	1570106	3970566	4093391	3050411	1661788	2099719	4242780	2986231	1918490	1232030	2491086	2037868	2264232	2410794	1670589	6988225	2364656	3566307	2480692	1214190	2203699	1647355	2036400	2146478	1899267	3457608	4377784	2455540	3749996	5247993	2913284	2546900	649921	1024496	2800769	932351	2011667	3488661	2619163	2943606	3951482	4304966	2734453
444.3302-2.109	35878264	36520232	37475788	43524324	41188316	38195512	31446888	41077248	44197480	38875116	39991724	43034744	42135112	26920838	40214056	41077420	41305208	39499804	43306080	43295968	31634002	37878956	40275384	40014200	0	30506102	31459796	41410444	41548784	31618124	42496520	41809084	40629540	30539860	30520362	40785780	39259100	31976528	36915004	40609596	42995844	41355556	30182624	28456010	31625722	39238876	31120008	38527132
470.42224-7.261	320412	1117893	1750690	1274968	687382	332103	891265	312446	319023	587048	695683	952968	3423750	1227963	961077	298553	1121013	397608	253100	292029	1300557	797701	859120	951914	204504	284447	434191	333669	290308	738132	321699	300341	323126	284718	2085614	341254	279669	135279	332577	286775	126180	251046	307958	292042	279056	298428	409488	315625
466.38837-11.623	304556	436247	247666	212677	208275	245982	336084	171567	184627	179271	222376	214189	262062	268522	190752	133720	139017	283287	177669	422623	428008	382074	286267	260927	187655	442594	467765	452945	237258	246626	309615	348220	435633	514430	344377	296820	281897	496689	387879	437895	318462	328141	251883	441799	594433	304363	204823	343142
464.37289-7.145	240912	264640	266952	183026	318930	281896	321524	297512	257328	238279	239735	252294	302981	348168	413502	263321	311907	277113	300858	278711	266452	255101	269783	253351	266070	235199	245724	219283	251193	238021	286010	233049	242601	245110	168697	252853	225196	219737	307130	282662	237482	223387	218506	243544	215475	181372	256951	177994
462.38852-6.764	423234	346766	485088	348554	272240	217221	325116	366606	225912	242588	482646	261846	467646	301900	593183	344023	619149	499851	315911	372687	435822	499809	608018	268364	741392	711751	624652	554447	671983	504602	558691	587823	528515	557285	647137	661532	661944	179976	474763	621996	468380	696654	478973	502636	476361	604884	967484	1011148
460.34439-5.651	450693	513169	1222644	1199951	459179	562493	1110931	1082375	920075	450761	1050096	1044440	441794	560805	1086976	511063	301682	986762	1067862	655099	371264	1278014	1402135	829614	435745	540594	1177360	1470603	972454	1312776	633168	1028278	1236476	1129540	1270016	1182645	865377	490961	363012	1476623	478364	412600	623935	1105964	1562040	635062	750864	1368196
484.4353-5.143	2366998	2399660	1050410	2187156	2263777	1037159	1005438	1779096	2085663	2114356	983748	1046814	1059229	2190404	1103768	912138	974507	2602769	1068358	972489	1570620	908261	2636558	994676	1024785	1090492	2351886	1251234	1176397	2038106	2987435	2606160	1165585	1130187	1159196	2945043	1236162	2609869	2524297	3099224	2551242	1226354	1205564	2695125	2421201	1179594	3025327	1144406
478.38574-7.009	3301297	3869134	4182620	6808900	3600247	4108706	4013210	4262306	6554950	3616606	4035164	3918490	3795618	7081796	4076514	3978937	4199054	4178419	4190296	4486003	3784733	3938155	3948979	4054413	4051504	3928641	4330240	4225900	5919299	4317818	3840600	3789540	3844672	3945636	4015572	3928625	4010975	5790722	6602160	4463572	5778830	4020404	3738941	3822930	3602141	3626630	3846116	3826744
476.37857-7.292	132235	251373	389671	200429	200997	190782	215689	298916	463516	140571	175241	427350	282105	124797	269190	441182	462116	327873	261351	184671	478989	171471	598057	120806	451656	446872	466205	202283	410307	272342	214683	393201	492118	203130	451414	539222	424298	145874	214378	579924	112459	189527	491609	355073	494721	324902	402943	228676
472.33118-1.873	6367600	6430602	7632758	7247008	6295856	4343737	4366120	7340717	6659666	6839982	7823624	4619272	6239362	4159076	4646228	7364195	6625940	7442366	4350124	4330838	6585796	4195674	6829661	4245670	7753086	4586498	4647907	4644486	4611291	7524402	7798091	7470614	7014141	8097816	4690936	4407980	4735966	6358201	7480067	7713452	6939835	7249974	3966120	4466766	4435264	4640384	4359362	8115068
470.32962-4.343	487646	269306	283945	264701	486847	260677	534697	336458	515625	249641	309837	374087	754522	296011	714209	306643	225974	715036	581990	429163	302791	254793	848839	303389	185719	210388	214822	455320	232169	481419	342594	480129	232785	429634	248158	301761	561465	199381	570263	525630	195646	193954	1007414	274444	448397	674996	1738865	565141
498.4512-5.836	731809	763560	1123031	1015505	884314	985906	1015683	699699	887039	760092	977810	987031	2073902	1611166	1246778	496738	701632	826758	762959	946455	912880	957333	1153318	811567	564082	315000	761648	579401	594723	886642	606700	696818	631018	553844	461803	762644	364483	832463	732657	606829	669847	602810	947643	645208	588058	662284	1216386	605431
496.4205-21.884	668450	678445	491620	535710	629522	607589	499848	520793	519597	512396	530688	579982	680894	639770	646553	445030	475338	825228	748510	549282	391652	405903	842220	545140	775008	720313	843337	953271	737324	760488	965407	932756	908453	851056	879651	1059130	879549	864719	716871	1224284	1031992	902985	867380	859753	626545	811417	991889	694382
494.42398-5.526	381210	427073	862864	992078	911746	406089	462288	760153	392227	823122	810278	352224	393832	421687	735389	779887	785069	872351	835568	674550	393404	961973	1105783	874140	756423	787991	975047	679298	408330	745552	922076	410738	785804	890567	669294	454675	829401	402270	448324	981727	395892	868917	573700	451176	801418	837636	669979	986713
492.40494-6.95	2076092	1779232	3070830	2398006	1662485	2249792	1808178	1966806	1771733	1935497	2121966	1799293	2685288	1533582	1914425	2096198	1942988	2101083	2251550	2392952	1953414	1958696	2255344	2741794	3114126	1836446	2919229	1827184	3007775	1984789	1874546	1701108	1748882	2391292	2427122	2358930	2784375	1646968	1866595	2067942	1567510	2362502	1587082	1734054	1638549	1664422	1714403	1796927
490.39728-15.154	146140	438222	770140	526261	202917	279245	328319	139489	158788	223560	129790	63230	105818	422200	139833	221569	282011	85405	102906	86556	90166	139543	124361	123495	144916	73822	115196	146685	107124	118009	131037	162835	103556	100738	133112	70461	114670	101887	95770	110463	97016	102140	134183	137049	99609	108554	66142	114081
488.35812-2.048	68983640	70775512	81311328	77025936	72751016	78039832	77361568	82504288	72302360	76395696	82652016	81109080	66689496	57305280	78818864	77393064	73817368	80570952	82471616	80274112	54287800	75237768	76886096	79777824	75767016	77655840	77693272	77589352	78114016	79153496	78512872	75420616	75973808	74890376	77187696	76048592	80125944	71699064	75444344	82016040	76622008	74652624	68011840	77468872	73662904	76681072	73723688	79850824
486.35834-1.744	1111209	2064675	1369784	3262072	1061788	1104095	2828956	1589626	1619908	3219246	1082247	1451948	1227389	1106896	1231112	1109143	1155817	1192310	987507	1057566	1031141	1128198	3143279	1066276	1316809	1243437	1231267	1862591	1251320	1132217	1419009	2538778	2506544	2128813	1117908	1431402	1300500	1307863	1890686	1258792	1279559	2697253	1352990	1370764	1593626	1271652	2922732	1326869
512.46527-8.317	368348	483996	492532	528347	434551	475361	565924	571274	449268	435036	469572	582793	500680	470794	505375	441911	507642	684797	470672	428485	533442	536000	505355	490859	506125	568928	578202	560163	517270	409782	610913	521932	460291	468526	492252	631022	509669	511706	482733	621490	566984	589268	691105	607611	489078	519282	411482	553884
508.45355-7.951	1260056	1030640	807444	1733708	1213228	495612	764953	2648352	1209506	1701199	832791	1168944	825618	698854	939624	600515	727981	853287	459691	600258	1407394	783597	1763125	960715	591417	1383942	668617	1059057	236624	1588179	1389199	1506602	735987	534680	769638	1409266	1010057	381381	688464	796354	445358	888560	598750	1431185	920331	759447	1739437	1468230
506.4194-8.365	963886	840836	573290	881640	835124	769622	673055	932900	823651	837102	653851	622987	766283	840927	891910	971089	579863	867399	752948	595708	815099	617653	712867	652084	935010	864041	728491	991083	744925	6083074	800872	1616160	757689	980996	620554	934727	815777	792700	724128	768140	858589	533617	787090	792684	783370	742496	862611	588124
504.41449-6.704	409265	170375	286461	261014	215320	1507233	397622	510721	212086	114478	279036	539701	312950	487202	620287	327234	612303	268777	217941	273746	124420	617839	284773	183727	1064256	337043	373253	497658	188577	472637	449714	238935	466499	649492	572722	450089	408729	229165	422102	547286	350744	546779	635187	507831	444780	884925	441302	438540
502.39365-11.833	138891	134310	335868	141521	99982	114059	140887	109168	96840	125266	292218	95391	109104	100219	139095	254085	328289	149131	115163	105504	497426	295542	159292	110696	343284	131799	153430	228925	128759	117615	161676	119578	345989	156339	427884	126133	143895	123912	129169	156215	114544	165548	121497	109666	270825	131976	101893	142489
500.37585-1.609	8166297	8001658	9453700	6937634	8048876	9516576	9865971	7347100	7646624	7241213	11340451	9929565	7528001	5641062	8311577	7577390	6828632	10364581	7959990	8348445	5561202	6648442	6853080	8040480	8909590	10682348	12591235	13578512	9663000	10872103	9692426	8418449	10175751	10094045	9184827	10968238	8689452	8920242	8173519	9501525	9273585	8859838	7036676	8460703	6255772	6442890	6065096	8712392
526.48145-11.267	880653	938720	832957	775814	761939	854215	716501	875871	715692	754245	678117	835724	753290	806983	286090	719662	617888	783282	862640	679813	497339	711813	661191	1136952	0	710376	1000147	1143091	2274916	1011391	1061770	1214119	949045	994179	1033602	982262	1234774	949040	1208743	1020956	1225016	1124053	1056986	1023116	1015212	886907	998513	462424
524.46588-8.364	185197	233253	227662	705370	200820	225783	256755	264088	342489	212815	226124	253413	243148	260715	244504	226672	376518	234322	188212	204717	225371	247322	240527	233830	206669	238959	335690	216599	217000	230309	730848	468892	232286	579359	404480	405047	254748	494591	402548	428330	346690	345624	669204	410962	245335	718533	704019	405429
520.43463-8.368	226436	227229	257401	235403	186138	231084	266934	226023	203409	195583	269082	241936	223463	218941	260795	273609	253910	261375	239462	244454	160373	269414	249788	254693	254581	250697	234186	276626	185326	4579846	232689	309595	221754	265906	261500	218569	235248	201900	198004	259519	206360	223300	226018	191739	228152	248140	234448	242738
518.42224-5.528	690915	679399	610704	388979	1126046	283353	321255	1348041	824209	670783	423610	630167	844798	1925531	809661	398394	599034	597672	919962	1606587	521033	563576	1293293	672008	0	404450	769649	304182	527107	607946	956840	1808080	1845123	820034	1162246	1291097	902492	1416639	397614	746063	1653562	520744	821063	1663605	1024370	1595122	2422358	2453555
516.40015-13.349	189602	143581	92937	322269	212882	117895	105412	120011	221328	118205	78317	78345	292214	112151	297659	94453	123173	219542	216223	77650	1407107	157822	446003	129595	421037	263623	106570	158366	275223	81970	235886	480086	525023	233819	429602	238184	136650	196588	292909	262904	229993	129227	317390	285884	375836	291687	284634	249931
514.38892-2.833	8513878	6920470	10104949	9870517	9130520	9090315	10699721	10300612	9705946	8945333	11054911	10066833	7960665	8831349	8629325	8761285	8698827	9240475	9003203	8718023	6723738	8305310	8687732	8586227	8432433	9404338	11018725	12467061	9139085	10005048	7510250	8579323	9325923	9836512	9494862	8968634	8117516	5755708	9145968	7100696	6156758	7619316	7028458	8460759	7258372	8719494	6394178	9425399
540.52594-12.738	710783	799447	690642	754095	820734	810335	642771	775632	670992	700420	643833	696544	664366	801313	1140205	647128	880892	1100910	743171	865233	694785	802211	1073316	725242	776135	901907	754557	929565	896506	925519	1042736	765304	847486	758797	731475	987511	901843	842943	763121	1080190	1015803	773256	696798	861355	816083	825238	1023038	744679
536.49182-9.92	733649	904748	924636	767688	728264	767724	810047	921729	838536	759944	1013928	939495	968871	688343	983821	875180	978568	828594	708695	887362	770847	910022	988748	833857	929100	962227	769271	929633	773726	668360	1042554	1040290	874438	933842	1410961	1032400	1036784	507742	893701	1086321	634051	890334	1118210	747505	944368	988746	1574495	892257
534.45636-15.99	396025	373838	448777	456728	626252	358923	366487	409024	345471	376551	488006	359284	318226	284505	369417	294851	310372	482813	503870	383681	324513	409738	439400	385169	0	452256	417993	407785	444752	375069	418800	392864	500496	465899	330806	484293	424224	381431	363159	384687	420918	448490	413980	429223	490430	417232	364102	430406
530.42743-9.419	547051	739640	713422	433972	316553	416819	857937	337134	200384	473308	428350	405555	621543	372758	429591	375117	453316	393057	333879	413586	796241	1069652	916952	418413	241616	305856	237172	265926	248541	324533	309878	313379	224848	294444	413686	316053	165123	206606	238753	210858	221734	242269	293981	234948	239342	280045	708253	400889
528.40637-1.741	16854938	39133188	23323244	23034212	7900318	18082588	23652576	31433682	9691156	11927219	21090074	18806448	16623516	15689428	29436926	25301650	18640776	29763926	16772417	18932410	15120888	19229744	39411644	19773404	38707428	22251016	21807570	25733480	18825748	17883592	34093996	30536432	22000306	20322198	19455106	11970427	23429628	10190032	29635444	31171674	28351842	20751972	16454327	21193088	14582782	18320560	17086978	20313344
232.07437-3.617	64509	84358	80972	202339	49878	32714	41165	122456	141841	142191	233954	150361	186766	102408	41050	120602	83691	152507	63215	128758	118537	162236	183922	36958	22702	31799	10705	44874	48992	12743	27712	40651	18025	30854	33065	81131	12889	14890	24096	14603	11140	27694	25129	25976	26212	42092	177575	37395
246.11537-1.494	574373	554433	550500	645379	450863	722182	629335	414376	404226	712546	875817	699897	522099	426532	557548	548735	577572	484329	670330	566118	509170	576934	574644	512128	597858	683020	636780	801797	732951	492541	772014	508353	698984	1006517	742297	1014872	729097	1146423	864702	603549	463741	748788	766148	649141	777970	644242	707263	539188
260.1918-7.159	237607	263409	232025	600050	327511	205344	331441	166666	282269	723583	222864	291741	192343	289068	267008	281399	283624	411232	171184	302838	169657	299534	504122	311252	262778	425222	242085	249748	220277	457572	314377	552488	638426	249397	366419	411051	485229	841719	307757	407871	632676	326352	292980	422864	211838	190469	509719	505949
258.1701-1.532	227348	249049	220488	380404	310678	215186	257991	308725	244055	266610	365275	126022	226537	210073	342104	307734	217344	286007	233223	213676	187802	280544	311592	262876	245907	221848	280910	231762	218535	242674	281227	221504	176346	224762	177318	236760	349948	242845	272203	246727	181921	239197	372348	294869	255689	250275	152436	215979
288.25323-1.68	318228	166094	198128	156473	147523	167144	115733	180051	210669	362763	854511	886004	202965	198611	165230	275738	891392	411001	250320	1905553	811492	775069	559998	212813	185844	120071	126856	178374	233863	218297	226165	206659	198072	148080	274589	198814	145678	63180	1497080	249873	293083	186106	473348	194037	222312	109722	1347916	315772
302.24335-3.723	233194	361119	551992	280520	238392	321648	252276	213258	230153	216741	279091	167910	175005	252123	139868	674471	303410	256883	465053	330546	212149	474324	290987	185509	0	470260	481168	661084	680669	549734	374885	503720	429650	551228	304599	477718	598411	1482314	500879	531474	595756	904390	1164311	517473	558391	475128	101834	338386
300.19666-1.492	2571479	2465218	2748642	2694089	2691888	2609123	2689014	3207898	2401989	2156160	2848658	2399512	2558967	2185334	2658966	2423746	2655288	2774981	2687524	2520766	2316261	2679294	2520336	2765818	0	3089471	3118435	3230918	3833567	3000589	3010882	3309398	2974714	3008026	3233446	3097780	3026922	3206020	2830985	2761670	3168182	2925744	3000543	2446338	2944143	2978922	3143120	2516085
558.52026-15.078	46719	40781	65692	89643	40678	43154	75315	44459	46568	39349	63860	43698	41835	54097	92026	34097	973191	151781	44374	33773	292793	72756	62673	52730	44097	51845	46669	37150	49399	46021	39736	39966	56590	35508	47430	50078	55219	33678	35764	40990	25851	52956	56466	57589	53258	62232	40591	50897
572.54016-13.042	329527	283879	236748	447766	332624	232068	347015	328908	334055	297998	270993	408090	444040	447195	237223	261082	280857	312846	228996	231463	424240	264589	294966	317101	232141	284486	202910	210721	265979	257499	269168	395903	295716	249832	373796	319950	300343	267902	250502	253044	252046	249012	431831	330552	301081	399219	666347	274788
600.56891-17.734	252671	1251328	284757	525861	220055	207756	1413414	439944	374820	188989	235151	930758	614002	288438	571746	206669	427703	270488	192813	128583	646831	274317	2210049	223868	167126	224263	131305	172935	179392	93655	279539	293244	247834	103678	226023	215525	198348	100317	160232	113266	203771	215016	114666	163910	343966	211915	3500709	230936
628.60303-9.782	285185	36487	22054	20804	31481	13590	27904	26575	22531	18072	19459	27318	23121	42942	26982	23784	30672	28933	15865	25303	54352	24466	38678	22260	49223	192912	119201	160784	121946	57110	563045	639365	345532	693686	704897	592177	246851	33580	88993	278821	191080	59443	440806	253100	473871	537437	1205939	294042
626.58606-14.464	736781	791884	902793	978210	1157795	858154	584550	995755	1024774	930900	863464	873121	1132190	1231299	884030	850983	939876	903122	711156	831805	686956	613395	757569	840499	0	734657	638297	600618	637939	620494	539577	893598	1153813	676599	824902	1075813	1025251	945233	583273	773768	849737	825828	671061	1230306	631902	798636	987714	1250519
642.62665-10.882	695048	657078	578876	1183540	821020	1435612	3178090	972153	536360	2213615	827352	1421958	366505	3387466	3707412	252185	2102920	121276	220636	115090	181230	632560	198669	182841	0	29110	87856	22284	32671	69895	34837	133281	72475	129975	139978	78011	279784	28339	11037	93123	41133	34070	24977	68428	120186	41049	64289	374599
636.56989-20.016	395667	305735	493765	638244	299596	263335	501045	517181	465347	395949	505398	590836	640344	385192	564544	543156	494498	459118	502683	286360	310970	414447	469857	482521	390642	534177	422218	548889	549085	374162	577489	536922	525948	547932	576501	523181	619297	377391	492439	651138	270108	473338	512780	450414	577942	635679	890968	415502
634.55133-16.949	177307	142777	139542	180490	131540	152022	150291	531971	210059	204532	148773	368784	224452	205528	159534	109691	194322	170921	185234	172426	246704	261913	303167	189898	126730	123605	122318	32005	53550	113910	186804	74485	149517	126316	171783	270567	59815	66473	79989	122563	110576	30831	181102	193310	155917	173785	364807	123619
656.63397-18.786	701063	1157314	1026461	1522251	1112319	890407	786204	487347	744189	623313	476882	1111764	802712	1342220	698196	386933	432718	798017	643881	496501	650968	347212	623869	612674	748467	383172	378995	697013	548899	735162	561874	542520	432381	859679	587724	792052	666405	360509	648620	356454	632884	726434	516206	728680	361110	492910	1931853	359512
652.58344-10.593	1042441	1173133	1302250	1707843	733747	831826	1991191	1294607	1346177	1118476	1662163	1994813	1851375	1166103	977339	1113118	473854	1331322	838860	855426	2436338	996183	1577568	1106228	496336	1107945	782489	748524	928007	713280	1229930	1804685	1141213	1541097	2038126	1980245	1148564	572188	989491	1046928	770787	798244	1321753	983340	1279970	1540381	3079145	1189135
670.64844-13.913	783657	683617	612407	761785	664770	624121	831932	617891	783776	568502	840145	929101	672914	617976	914339	698933	629016	892505	597839	689203	890391	739401	916657	645547	750378	592077	639313	644135	551992	718478	679756	855987	641627	703507	774452	670951	719113	639554	863670	791863	573643	674070	702840	834140	645123	749850	1032382	630254
668.61481-16.408	950960	969774	756556	1189790	914272	688679	1316994	868712	1185938	1682247	957848	1426462	1797572	1254393	1075513	1069881	637703	1871595	766290	1905117	8670377	1211543	1496264	848577	405019	698990	474803	619073	729250	583446	716381	813996	698948	549356	920279	865217	694661	343523	922984	711570	433334	577294	758447	735808	790167	821508	1327376	615002
666.62201-13.905	859302	844035	1108930	1106418	865174	1094729	941332	953509	760378	887597	1205779	1071740	1067066	955545	1086204	944268	966604	1101992	1073787	1129213	845905	971990	1223430	1086754	1074864	1020568	892396	1088824	834029	1155639	1341210	1137256	1084833	1215695	1107362	991339	1023230	944769	942102	904249	965538	1045022	1067994	1075243	1227933	1074229	1143323	1277040
664.60052-22.514	773558	352547	865828	911261	299563	784130	1439222	342908	551445	1645654	682254	1369478	600880	768991	673495	670276	666313	1207219	953612	878217	902179	560468	575524	1073264	1157600	919490	995710	733253	809823	834384	457906	1350353	1261921	1088276	958803	1039713	1152928	831047	417110	1077140	977971	1305231	1015647	923775	1006248	818442	557494	776633
662.58856-13.848	3606669	2340062	3548740	2743209	3822370	2192836	3857905	4309356	3930511	3735793	3635055	3774682	2881121	2931632	3203862	3568782	3472208	2518298	3281345	2073123	1756152	3325122	4142337	2390283	2364469	3606896	2985032	1960705	2507674	1050024	3949830	4515290	2151449	2065834	4058530	2333426	2582020	1125451	3274649	3363516	3454542	3512054	4019380	3403866	2177402	2560612	3101274	3593246
684.66486-22.332	457974	448149	512305	687624	419506	498288	1403298	425548	610286	655401	522820	783757	528193	439071	543288	407256	1025271	1339054	574233	467070	1120759	601588	2455442	586039	1480614	547910	212473	200581	624844	521713	565537	697065	694153	557976	496115	555744	1583247	442455	511813	562708	498703	550006	533198	600725	597854	779156	686905	411868
682.64807-22.064	3050514	2503754	3187551	3975458	5080340	3395418	3776690	3976678	3742543	3566412	3790490	4173176	4874205	4638940	3843309	3878349	3205072	3144890	3597792	3447194	3497822	2442129	3654967	3321578	0	3061375	3615735	3527426	3881920	3466772	3156585	4279636	5310966	4175210	4805532	4942476	3659411	3022560	3618883	3069343	3736778	3046354	3213338	4265627	4071048	4328238	5230201	4980724
698.67841-16.869	186340	38273	31305	32018	25985	19915	42410	40573	30564	30986	87710	43212	47684	40498	31751	41224	37236	38535	34607	53008	45205	80836	53347	36323	122637	514866	327762	515427	379408	27314	869699	987049	746793	1090716	1592199	551164	476687	367101	209935	401608	296828	373908	693598	682636	1077342	1506231	1329611	538929
696.60504-22.804	2056930	1878127	1742796	1299076	676818	1003017	1183075	767813	2403145	1380009	2342881	1259279	1076319	3650593	1883084	1040738	926875	724308	1127047	1080517	1080217	1018012	12387265	1473196	0	0	954941	1217761	843080	715878	1350534	811709	1288144	1309467	1115380	1406704	1200663	2080362	1801509	1030419	1049212	1006818	1331694	1149843	1839000	981399	1619253	2465537
694.68195-18.832	653944	518518	565402	845705	440701	502066	582167	940944	655985	525385	891913	986771	1156153	1073736	676181	885791	722196	920938	621211	599083	907942	677505	1024540	696158	518379	486882	398404	308633	501560	310515	778896	950950	699047	599720	861876	914428	709967	290520	770124	921794	624410	462623	1077601	691404	579276	910622	2302552	690514
692.61505-17.304	695884	967167	676027	650320	620877	422730	327292	805828	627435	555521	485897	667831	891094	885204	722825	280156	613793	999538	487833	577024	1614919	310820	366179	683924	673948	298282	772847	386268	662185	763770	764596	547055	565900	326431	743806	651426	729120	486617	478534	742248	642714	269898	555875	542480	385660	564548	679785	326585
690.6297-17.179	731635	662195	569138	929369	654943	616914	520327	723827	621856	599338	624945	807051	665470	864613	808798	729075	681607	846316	512573	618822	985266	586523	701693	753840	1033118	678027	683317	459520	704897	606124	796970	806102	821915	683128	819265	1279617	1054625	478180	755922	1105759	871338	753201	725989	749401	605382	793629	1369428	1011703
688.59888-16.004	1721560	4192325	1204527	1250063	1313152	713742	475944	3335429	928828	2030716	1401706	1743716	2158600	1814687	1390070	2418084	1717788	1177162	912403	1450030	549614	506148	1376806	2842870	2393901	1397002	2370937	2638301	836170	412992	2861583	1513894	975189	3082630	3777520	1755135	2705605	1249371	915475	2039366	2633746	1733830	2683204	1088664	2462756	1809852	1522151	3512481
712.69073-22.62	548760	1699486	1489402	2100182	1249753	548063	1832966	1503166	1792056	1869741	1558892	1593977	1012887	1396070	1214157	1333555	1373138	1551343	1563402	1325784	1342795	1561121	1554885	1643245	1609219	1749815	1622263	1606408	1785229	1281912	1776373	1875855	827085	1598822	1441944	1642849	1679023	1454921	1286325	1370463	642598	1697554	1517319	1606811	1685598	1718245	1907973	1285571
710.67987-14.826	617127	669531	331850	627288	521777	359196	644792	819722	729382	586921	449329	745783	678258	908331	398697	440675	385519	689037	350442	553600	1123420	661457	771727	560408	237586	366308	310554	328713	541980	324649	630480	715980	375775	463438	605815	497227	418778	463178	551696	524528	477561	322098	545154	595281	508164	862595	910388	431780
708.66766-13.351	823974	976015	591293	1238669	1066588	562297	945771	901259	1074616	1120215	756840	1014247	1032466	1067857	869247	614819	651236	714095	702190	593318	1383761	701101	756734	656247	751111	696642	512529	623593	875704	484133	765871	1382831	723552	1124444	1146292	825415	866301	860548	972660	724093	911345	624654	1015057	782915	899425	1173723	1829600	903553
724.69464-10.713	14877456	14714332	11342946	12965826	15984696	12016083	15550813	12863786	14168363	15539467	15126343	19458610	17340106	14117902	18551830	15594228	9686115	15952005	16884334	12915004	8559698	10969078	17503058	14277965	14306114	16888096	14267274	23074316	14623487	17919030	22758798	15970781	16059527	16146949	22301386	23598904	18806798	13849885	13553792	21187778	14665234	19540098	14538389	16314178	13132758	17960292	14720149	18215602
722.68201-11.647	1082203	1135676	74307	548264	58928	60114	262312	190505	2728306	163746	158350	762749	459656	246385	690168	168503	59666	190259	404199	342918	1002650	4161658	2203327	920306	64111	4002830	288896	262067	945800	999670	1267145	265887	1076040	223474	894105	1641011	196290	253082	510761	2432408	206066	753369	1393324	569979	2985376	1252888	1061987	244675
754.74243-17.182	310256	298257	326995	539064	265755	328245	319694	476356	340995	299016	473822	608869	443164	519247	441035	418518	314978	424976	274493	387773	439754	341880	420635	431066	317582	323794	304574	141184	333685	275764	324966	449579	385662	338455	379083	464420	354832	135417	349984	388957	389295	231667	467389	316982	259568	472157	884887	320559
750.70374-22.458	2042157	2468842	2502193	3419248	1986445	2184287	2765365	2053859	2246284	3017433	2484302	2391399	2097370	2267197	2286933	1872125	2318144	2856998	2095296	1873482	1440058	2742702	2717073	2374954	2523820	2150626	2504774	2478663	2533218	1996794	2699970	2774622	2823376	2325942	2440990	2477850	2511402	2131481	2114671	2612864	2269573	2676290	2353472	2321822	2289828	2314541	2356234	2083174
746.68579-10.754	233489	261113	153019	135186	105791	36554	127060	52824	410743	42650	113010	234901	68368	54733	110985	104245	96434	99883	65982	54720	204233	1196027	349659	96429	35664	735839	132280	95177	250279	155639	185959	62306	211321	73611	149350	345754	84678	99793	115032	507105	42006	62698	272407	146436	806824	200277	228296	103866
776.73688-22.517	2212832	2426546	2573914	3697346	1895389	2183479	2929180	2121562	2181568	3160600	2556575	2327513	1760523	2138053	2048404	2022582	2328865	3271251	2310939	2153170	1938634	2851832	2750655	2568579	2745238	2767934	2796292	2811877	2616487	2294618	2711451	2962808	3347868	2776482	2867804	2510934	2850321	2458776	2422268	3049822	2472178	2937766	2600206	2620843	2875111	2508254	3389478	2206302
774.71002-12.494	3195488	1836045	2894682	4618007	4120121	3087722	2989983	3582426	4554540	6070208	3579604	3963146	6298886	5597982	4836810	3862873	2583318	3341277	3941484	2379590	2565972	1602530	3291786	1773060	1858372	2617086	1810739	2503074	3327516	1858012	3767094	3015910	3072601	2751587	4470774	2410492	2648819	807351	1773831	2733144	1775193	2765138	3365506	2100519	3081268	3269676	3860555	2515712
772.69293-21.689	396508	459815	470206	577199	348530	399538	555429	727105	791883	545529	437873	756533	1795598	398061	510246	585168	419436	1510351	514181	746694	932686	467800	593599	498388	473037	925805	508684	585641	891061	433645	961392	997743	582105	932874	555841	862123	529687	762602	468568	614500	838285	626157	928209	815763	1001513	914739	628969	806992
770.68732-12.007	905007	1019798	747665	1078692	916628	761554	1439066	1045802	1202119	968035	977035	1337518	2041820	892976	1236784	1048154	891244	1026151	1226374	1666785	1348892	1264512	1683714	1053264	444580	919840	595440	666141	1002251	1037883	1151518	1091273	954135	1304592	1985950	1095157	1202260	671359	970422	987756	651639	791869	1163038	1184085	1478706	1493242	1446795	1176183
768.67279-15.151	1407912	1842611	1964662	1755192	1681589	1703177	2182416	1877900	1700967	1570774	2000382	2133880	1790780	1057221	1923652	1438623	1500174	1822065	1497825	1520748	1514910	1590813	1810166	1644663	1508172	2027886	2063188	2401813	1661154	1985789	2126015	1709308	1786740	1802369	1971089	2195457	1623135	1740210	1607523	2235754	1770815	1628752	1576358	1687936	1393749	1626563	1700786	1720846
806.76874-22.941	2375334	2522064	2748804	3736181	1099468	2459581	3118300	1209400	1265423	3045370	2777453	2384152	2102042	2447769	2258510	2272056	2888672	2163490	2306766	2338900	1164637	2965180	2955751	2676167	2813334	2502797	2759506	2962079	2724485	2330332	1421739	1489536	3078643	2659802	2740916	2793779	2888014	1182373	2424380	2964897	2500654	2961568	2665357	2689104	2602862	2450184	2182747	2465693
804.75409-22.665	2021674	2216856	2420879	3267277	1706442	2070065	2604454	1885425	2043854	2860853	2178724	1901845	1559299	845386	1936945	1797216	2214444	2955684	1970551	1910629	1763460	2387971	2402484	2359289	2557642	2114360	1063014	2634314	2311858	836510	2418933	2612330	2840380	2195668	2202639	2213816	2504986	2104725	1848135	2605837	2197204	2558125	2294034	2311273	2203324	2015488	2914764	1938513
796.69385-14.402	344973	551422	445339	574660	404165	364914	615700	665478	511283	367197	593712	470837	606620	384704	671785	549894	483581	584237	538101	420028	411427	545060	889201	543908	414939	694127	382340	423228	358324	465281	782855	552693	359376	669234	439614	475163	433933	136671	454688	965023	134700	516111	548893	527928	463152	814847	633698	620390
832.78937-22.924	1974095	1974775	2400999	3200647	1675925	1948678	2448431	1813342	1892416	2738589	2039792	1802031	1309997	1907701	1731438	1680714	2116531	1754224	1839390	1815134	584688	2401338	2293428	2263492	2522282	1965228	2270010	2437510	2151146	1986286	2324672	2423858	2752861	2083492	2127528	2101934	2474508	1925028	2008896	2589272	2186622	2454820	2185378	2205086	2083026	1906051	2802264	1919096
830.76788-22.617	2686032	3003088	3274884	4601380	2142068	2543618	3322024	2598214	2568330	3883746	2668720	2320922	1787436	2351874	1893505	2263250	1458952	1624431	1211833	2417040	2632339	1466884	3429608	3227998	3620059	2848710	3177392	3411334	2762114	2757053	3217754	3121161	3751955	2749440	2912775	2422707	3129792	2478631	1245066	3652760	2919384	3176990	2938244	3058906	2840978	2552000	3653100	2662840
826.7475-12.07	117372	119329	152657	256537	87548	110317	246682	377591	107016	147564	276965	257922	196579	263879	199891	249514	733465	182157	154888	182102	218089	268038	308151	141854	110486	206660	152974	113117	222320	97238	140177	125745	138515	196257	223042	114488	163918	51696	124024	178652	129172	166716	56636	84004	235660	144288	187031	167648
822.70331-13.297	899948	780246	1272686	1671485	800383	655380	1670162	1042096	847662	1324815	1228015	1787770	1186800	973572	652807	1329164	1328208	784292	1192360	1143036	867241	1355229	1601787	1376256	510292	1308872	741873	1119083	676961	980485	1348442	1589946	1282290	1215932	1602405	1322999	1201306	915603	1088899	1233854	1113646	1077325	1410505	1302872	1354326	1583220	1562023	1213685
852.849-8.154	46029	47313	34688	21974	36915	27687	28998	21920	24142	23326	24327	7300	28739	42173	67344	26675	22993	18171	14135	16130	21681	5000	60157	43206	24944	12148	43168	60913	8829	546	66180	12708	22442	7060	21327	36988	10703	39450	22167	16006	31101	28333	20144	20848	16745	24262	34043	40106
864.84052-21.931	646970	855574	633063	1293076	544091	467327	907389	904129	1028038	927451	841303	598351	730845	1621313	682848	492237	535606	3079423	1210091	1384245	256506	1328232	1118259	880336	720838	766922	821902	842807	362111	757823	1102129	1137457	1073830	1436076	929306	2107566	1107247	657993	1494154	859147	1041578	712501	1543458	1048369	475157	898228	2810964	764860
862.84644-23.556	908257	387372	450359	626576	483185	402986	453069	782888	395116	520443	418798	709393	616685	408521	331919	372150	394733	1153962	810459	369267	857294	438729	391203	442239	483553	816173	479323	516673	447797	369487	484686	1120422	570636	976020	1083983	963820	513029	414698	390823	497513	456934	516044	456137	421642	449785	406817	1253486	414401
860.81726-23.235	1830593	1983086	918507	2962570	1477549	756023	998813	1731238	1805174	2603214	799822	1200504	834368	1727145	1525905	683610	821686	1478935	705646	1712696	1317846	895140	495666	2072225	985255	728686	948581	1048677	1917320	761537	944469	2202692	2531780	1975422	2023176	1286021	2262348	1806403	763706	990947	2016172	2313289	1568397	1983370	877103	773359	1685453	759617
858.80408-10.898	102896	329264	71317	96701	30650	88388	59032	65523	124520	37888	15411	42480	45065	75263	339904	23712	34835	92965	13980	27604	64780	45658	176263	59354	74894	17137	119118	225357	100165	8965	140222	68081	12953	84810	35944	115200	15639	139610	89125	26619	20652	57555	50862	16122	72694	93413	54542	66706
854.78271-16.065	653838	543346	500799	951775	715832	499769	455167	562734	620354	664691	517835	621795	936764	884501	526129	526891	613684	472208	465989	424544	699650	408054	633478	428721	486081	503656	349331	323954	517364	296677	709850	896545	589295	453832	549322	695461	703104	401748	576102	545580	527026	365759	828408	747282	539597	778297	1726430	516025
850.74774-14.586	266239	263030	167322	400639	264565	241807	276725	398438	314805	261500	128794	314236	268453	406326	300090	125035	246941	291077	274583	245057	408609	131081	282576	266698	223341	260937	231355	240099	258978	279624	388032	305478	289860	298450	307388	310033	301653	340333	273673	294408	317953	249807	297639	323608	310092	428669	458548	313193
886.83929-23.25	497426	494316	552033	871155	342888	471980	601085	440834	443385	735978	497119	427561	279882	433976	386220	406776	548569	549267	408723	458345	1985912	552602	544141	604236	719370	482584	587921	622126	525177	513037	575907	581228	726551	514162	508956	454566	524994	512241	485191	656844	562110	622790	568933	538131	563402	463586	635507	497291
920.93365-23.612	241409	246143	425576	291429	386918	681413	250428	309555	223421	237499	331810	558997	367812	451295	244262	379436	390404	467035	517746	208814	434004	169137	1060620	481838	0	361018	387552	306799	324800	462020	249108	311659	293152	342409	263096	253697	815875	295154	460217	419396	328346	273037	327285	261935	258452	272073	234257	211103
918.94342-22.202	1105408	1058566	1132947	1370407	1242283	820844	1384165	1152427	1365028	956555	1155025	1732014	1588615	1762042	1404458	1425582	1775396	2185668	1859433	1011666	2271963	1345917	3033400	1160805	2030670	2024395	785384	775376	1471330	1137714	1446019	1086011	1139221	1113744	1428088	1713341	1771518	554290	1178530	1360105	1122467	1100370	1396080	794248	993600	1582921	2195384	1661192
916.96899-22.24	341818	270170	492176	545610	587288	467132	539044	514438	515309	576939	496685	587302	580367	181180	486451	603899	454755	487231	239906	495471	502846	358594	502013	668023	0	496313	468166	478415	508332	481950	501302	635781	578359	486489	567438	399460	600129	495315	445513	391061	544004	414354	417530	494420	507278	467255	462037	410830
912.87006-22.156	547624	539457	556691	733919	476457	381274	872382	635805	691388	551512	696043	714946	874642	627193	704878	476440	1193549	1117471	781236	391456	3599992	936332	1357543	887646	1103048	1100838	547397	532486	654967	583804	725910	778206	622776	745085	1003563	763580	1071967	349747	668148	613852	681381	626705	761548	495460	604161	655898	1224592	746962
910.8324-19.577	2104055	1407052	970515	1165830	804839	678988	1924713	845010	2039727	571912	3008694	2423686	1063258	2242495	827981	4075748	1093398	2780119	1398759	1943770	8398852	1579696	3387282	2172544	1252870	1383254	582360	560706	1154057	1925311	1568847	4055534	1601477	1658140	1881306	4593566	599278	403037	1577956	978179	1849318	1109195	2871390	1337194	1913998	1351678	10036839	1379303
908.8327-22.206	3523988	9843016	4072682	3876415	4355946	2566706	3305710	11459432	2625190	5694820	6165188	5399201	7125683	9360908	5004288	7747116	6578394	1907229	3282904	4582126	823049	3162060	4441005	8187719	9509053	5770266	9970613	10806519	2897174	3610491	10289317	3867490	3159691	9558322	10375200	5358446	7621554	4471169	2131022	6689852	8160144	5320748	7594639	3457245	7722292	5540616	4545788	9301347
906.82373-22.864	4563341	5593325	5836276	8147276	2960658	4148021	4711054	3901937	4234148	6566828	4373942	1999746	2001408	4397742	5245152	3246920	7357218	6528575	3931232	4428379	4179358	5137470	6623012	5489108	6166939	5620689	5405440	5702513	2120911	6029473	5262078	5394654	5584182	5078472	5767913	4695335	5420328	2790480	4639925	5871102	4778338	4468480	6184930	4353011	4482864	3969813	16250482	6906935
948.94769-22.613	470681	944269	834900	711556	455358	257713	468664	762522	838657	792197	382603	773130	968259	667713	1168552	803213	1407049	1667098	472862	874788	445776	430963	1495213	693116	274190	849692	575142	466841	261345	655765	1032521	602184	564264	641227	1092354	964366	785326	208204	281134	469222	487253	435507	818001	491978	536014	543215	2241491	993632
930.80402-12.6	216277	342750	354356	102979	296640	357950	495093	480166	383755	324095	335089	278179	356893	412142	244998	349565	58148	294529	386999	250514	476230	265905	496446	301152	140609	364787	261124	332518	351665	241159	359242	382523	394024	571650	595881	497867	338802	248109	517139	393370	256027	268883	614202	403932	469685	522451	720331	494956
942.91992-22.561	583098	461096	568887	897558	551589	543812	719301	712012	896774	645025	707389	834558	863213	635607	914820	566311	1121459	1247515	819423	499907	4223612	810489	1318200	648574	1103146	1021012	466053	421450	766840	494844	633727	768993	633506	536679	770994	1085684	1583866	288542	702086	713261	720361	746468	915481	464490	530300	717659	1898016	559528
940.96954-16.128	47592	91575	47375	31273	50136	51404	52834	29535	28664	32828	33295	37885	46847	38856	93110	27629	39840	51112	32127	35563	37117	36042	99709	46221	27860	36310	63942	87265	44075	11505	65587	54662	35941	61006	32315	55668	34853	61428	39972	59602	39788	41172	33318	48540	41982	45503	29695	43989
932.82385-20.722	772781	829293	828015	1533386	1793600	1150388	1317572	1211838	1362785	1726255	1408167	1856557	1639006	2035338	1577133	2068898	1562161	2621436	1765743	1415230	1017404	2960653	1722857	2584078	0	1587942	1601212	911610	654803	1315185	1028345	1929412	1567731	1483411	1241806	1962337	2061630	2543466	714168	1835996	2048450	1628398	1241814	1660288	1343815	1336700	2065265	4173921
964.99347-10.226	14416	22799	23045	39131	19082	35225	30709	21698	33767	30862	19971	14669	23199	25429	17910	26972	32150	15961	14183	23286	45761	30534	19095	19716	14806	16997	30682	11232	18146	12919	20875	18795	30016	31655	12249	20859	28134	20303	15802	29585	24100	16793	38094	24689	16453	20974	23546	22762
958.83612-20.87	386314	434928	351748	443314	225429	326582	318339	339664	462894	277004	395692	411746	542782	421106	336924	346566	516759	485286	318879	310017	3198400	439579	879656	374105	207575	568769	239470	251812	236446	250424	336419	376702	271676	261607	346949	381919	187840	159214	234026	320442	256159	179830	299257	245795	418250	301622	793565	277854
956.82208-20.328	354253	985696	486732	632875	617206	404452	514922	765082	844955	464200	680297	861108	585296	598510	482923	810948	514072	716669	452519	679237	4371419	628167	1218578	724070	331320	652100	308352	206714	428738	609491	832374	1175665	509913	366675	451504	1271354	304309	107748	711599	881925	649894	282288	723867	436895	495125	487897	2942264	333208
970.9541-9.333	63284	68869	94141	46910	58875	42591	59858	32794	19719	59080	46389	36837	20814	46073	61574	57246	32694	12787	56972	20223	32225	30445	30581	110145	0	37164	27266	50228	83008	49692	2321	66833	33750	20682	43769	28406	80431	13848	77533	48826	18011	40029	29948	50508	41211	48869	66835	13173
968.91711-23.581	1279376	1863891	2014992	1290928	320878	1501238	2023905	1657596	1551314	2765332	1694415	1407792	220062	1453397	1185710	1360316	1950233	1958668	1561503	1549376	402357	830601	1948812	2122945	1105669	1602912	2060159	2107944	1718922	783298	1936003	1988405	1080413	1640492	1725830	746729	2060737	376914	1701277	2396022	1933493	860078	856263	800391	856941	655958	655923	1674157
966.92047-23.618	849682	551810	973393	895764	571485	401558	542024	478398	450896	1327570	476963	726549	428620	737518	557041	364930	958974	2519240	847364	1850980	1828722	549461	1003295	615302	753355	840119	603155	657016	491645	874009	921167	2337350	1197878	852430	970047	1877894	1090711	706702	842527	701237	981152	577374	952126	927974	938627	721133	2894707	891197
1005.01929-23.173	385773	397223	396144	469935	290410	266553	261561	279628	362409	309588	399721	591581	1479364	465856	410808	220877	432650	772205	319866	354798	664963	483816	557999	424630	290791	226574	219795	225448	308790	370876	312381	280992	462129	478790	481922	776729	370443	187578	352699	272809	294749	291179	436919	277475	223905	204525	1376728	340092
984.854-20.892	119817	262189	211974	294858	165168	173594	224514	197810	216531	169943	198430	275020	251205	219798	211254	241394	235274	225596	140161	233148	1505450	216657	419439	199352	183237	336107	166507	184122	167542	189089	272355	243452	183460	196780	270402	285200	160521	121840	76714	105377	151821	143127	256716	168426	262708	221692	573601	189829
982.83429-20.381	296206	269253	312791	572937	318885	231735	506504	257789	398627	211396	288954	319623	363451	363387	285538	358791	244702	298951	315659	241248	3034898	319736	559210	260996	206687	421659	157453	124876	235345	226245	444092	479986	250023	190876	238025	599750	239120	72632	228447	273289	310030	167058	348656	234996	341606	272291	1491760	198889
992.93512-22.567	570678	604097	518946	625204	555340	393686	732434	671845	621429	522567	541237	721551	804064	473643	640734	528156	825812	806609	592294	393388	870372	502364	699389	501931	647178	736562	468233	551657	581271	463094	669547	669988	542041	650324	745416	704341	788583	421585	560399	589708	501010	593636	689392	567610	697963	715304	1092543	537115
1031.07239-22.474	119793	143006	200775	159256	270583	231596	68675	239701	258986	206947	155905	213999	413005	206451	277191	236989	158125	85406	222305	168231	37088	134046	234676	65565	265636	209419	68602	311513	250280	217603	256170	180278	273896	211759	118114	70297	139177	317474	199248	322226	106581	153027	121837	179492	177921	239957	59065	110049
1025.01013-22.374	266969	868859	494659	644710	492432	289984	459465	1072586	303460	619613	582544	468622	520247	647479	488922	922919	679031	342462	320206	516899	144244	298924	455772	788813	988163	686328	843820	975983	340790	541421	1154660	337294	279401	911264	1020190	561155	816838	494937	268790	737665	563552	724551	764032	283978	781998	430518	155041	852280
1023.00385-22.433	1272433	3288316	2016567	2061847	1790754	1406177	1497780	3554154	1371669	1943471	1425505	2224223	2787956	3555660	2093809	2297810	1502617	1553641	887027	1135449	588560	1418672	2083549	2354992	2565024	1521886	2788043	2897814	1638432	1089865	3626458	1065894	1257187	2455400	2664057	1993977	2548632	1543478	827510	2594430	1968931	1519855	1715470	1496385	2071288	1545740	1377023	2406375
530.48572-12.669	282520	265131	245928	293464	212487	245201	310156	209608	266898	305912	219485	166358	198841	235802	190389	216526	292766	577455	217629	187604	275564	277779	285854	237262	261737	251913	177695	222074	205014	206329	266986	317322	298178	225883	257747	312152	273948	198523	310790	209253	205561	234607	251775	258272	219538	239014	544218	206789
544.5036-14.304	135882	142065	207257	270702	134460	171759	134262	94418	147828	199408	161275	122278	131874	156220	443003	83353	1194689	590172	75124	31922	79269	176298	273340	162412	111243	67730	143527	134452	112160	78265	139756	149710	69567	70641	114371	155910	162540	95489	99075	98158	121378	108684	93791	43451	88981	139310	167711	104132
390.31754-14.216	287919	451499	348014	359618	515488	273921	298685	304367	342002	376112	246260	119676	453248	282677	614178	294806	330125	476952	302118	224871	290764	394314	350702	342995	272650	424903	292062	286180	336803	484498	498370	452846	404119	493368	244514	487990	697059	929086	576857	534995	823323	744805	685817	755286	645568	574106	399640	649239
404.34555-6.394	542545	291721	220719	532451	1734456	761868	510818	454569	267076	375625	829059	900425	207118	926430	934564	1555250	597600	1665091	798770	619691	665638	127548	404448	850740	0	1567398	241901	246582	211193	411782	247976	1290405	361076	161321	380442	885294	959495	1107264	95622	1293892	316595	179418	281383	722356	313870	220958	1311052	1523449
418.36533-7.198	2239	3635116	3670698	3552169	4214766	3162674	5206713	2286130	2875405	5872212	3376777	3970506	2720613	2923756	2782174	4683992	2679591	6928820	3077691	2446818	4150318	4655690	3016165	2633279	4539375	0	0	4660470	4458411	3727507	4106477	4056126	3130806	5437560	4968850	4484373	5569196	3669279	4985464	4514812	4385672	6308808	5434124	1939296	3056920	6402212	5434895	5363314
430.35284-7.256	3175482	2948105	2761178	5986288	2157888	2564480	2546792	2108424	2415851	6546356	2123268	3570031	3243411	3300975	2718242	5897256	2226702	3779610	3105217	2531388	2093871	2866319	2037882	2790642	0	0	4849887	2822663	5182224	4510122	1860747	2334186	4751704	2408325	2046344	5363566	4770548	3056493	4442932	2753591	1940952	3298024	4424288	3209665	4228906	2410151	4656572	3312826
446.37112-8.504	1895780	3172812	2103802	2993504	1952677	1569799	4123806	4062796	3472453	1658550	2093136	4238524	2985183	1917819	1524900	2523264	2035905	2255161	2412583	1667581	6966730	2842006	3500486	2483076	1212124	2614940	1980691	2460171	2575090	2262596	4029978	4375855	2452708	3746494	4492458	2912241	2967348	1456139	2113105	2799132	2064724	2004941	3484894	2618540	2935249	3952298	5014312	2730109
444.3678-5.713	592057	671238	488240	473812	668840	382791	414539	426894	377927	443781	477206	505613	724973	571139	708387	823737	477038	526210	1161851	887766	550056	832141	836123	399679	946631	394404	400113	427606	464468	425847	238755	448367	435707	700629	468527	1312341	905147	384050	476215	979699	749011	396891	1000969	460323	451620	286312	893303	227790
460.4072-5.713	273601	147913	660595	674749	245479	271876	588563	300775	280768	216700	579171	693014	313950	357715	453097	292336	180891	401435	614826	490331	167576	630795	855239	654112	144919	655405	355599	200207	142412	405756	245768	180789	176290	398406	421667	207830	347122	153318	210015	472618	146035	288546	223093	204378	379464	448359	314901	403860
458.37473-11.521	197236	259077	247682	256970	221276	214019	271654	204479	212285	245748	263363	203314	195767	163491	254321	214243	193157	258424	205115	236005	221262	242101	217959	244735	274432	240729	304555	416557	301590	278989	317392	261322	243510	307374	218794	228602	278625	348755	263995	364392	371870	326097	227720	382825	273316	246612	198195	285974
474.42722-8.665	167611	182979	66120	79519	145197	88158	53144	159859	104534	114308	59872	57445	47353	71028	69081	63063	260926	187676	155889	147009	141766	85215	91541	176186	1033846	397861	514440	395738	321315	662024	320243	157199	408365	584423	488722	224232	236790	229803	448989	466861	529210	367211	86562	210600	228382	291845	59105	356435
472.39508-5.589	449608	542540	534752	416709	198130	400042	593058	573559	421227	208063	566040	460907	526708	481440	442060	390483	425887	400080	390541	388541	538717	612860	542997	410661	377149	530600	568671	707853	481550	617620	737542	568329	664724	583975	659109	642422	570218	481679	546906	465753	482383	501832	559535	681741	646464	737956	643916	640972
466.35153-2.034	2396687	1417700	3000831	3106370	3359045	2826974	3133034	1703669	1811714	2844776	2693048	2952875	3764312	2518686	3767825	2945426	2337214	2027815	2650964	776710	1976589	2472988	2496916	2647313	2787792	2080332	2076778	2118003	1825459	2623566	2178879	2107670	2086966	1748226	2169258	2377962	2321616	1680918	1245228	1917542	2443244	1775745	3162314	1849158	1743763	2022125	2964382	2006073
488.43961-7.268	198030	359981	409209	386601	216029	249157	308201	365450	258742	262419	350633	433687	1464835	381365	439634	210208	407043	376747	237863	244536	368214	443238	411778	380436	142732	246919	265654	360450	260073	614916	181024	243271	349109	237102	631983	212443	143527	118491	261271	286324	171010	291852	186436	278281	255150	245234	206329	298308
486.40305-16.319	486.40305:207982 487.4064:119252 488.40976:149933		0	0	0	0	12690	0	8034	2576449	2513866	2477504	2131994	2570580	2392821	2909927	2521237	2342608	2410413	2340218	2357786	2416356	2460097	2882270	2875476	2933962	2917239	2855904	2936914	2952213	2858244	2886632	3264874	0	0	2439973	2700423	2844954	2902937	2737598	2650079	3673412	2722961	2739866	2750033	2662272	3526011	3342604
484.38397-1.857	13650429	28975350	17645312	27497482	11090048	20932776	28343216	14491299	19920134	24548848	15150788	19630998	12108125	18961542	12785108	11581865	14478247	20209416	12604085	22819866	19254670	23002626	19831838	22688536	28537986	25884820	15563662	19154718	14250768	19248374	15193163	15253299	25737564	23562970	21985454	8738123	18053694	13689698	15764239	21100924	14421801	15416855	20760026	25174276	18590208	21527848	21927736	25171710
482.37958-10.122	572612	761986	386102	382148	430979	657455	571446	401656	434090	403177	550001	482139	371299	372875	720425	479868	562441	646607	569896	479017	540084	554339	498400	491425	726011	849116	943753	1238039	651518	781198	694281	510817	742751	1059985	678395	893133	664391	888534	763346	735985	873853	910282	515406	816922	703185	624602	454297	802300
480.36658-6.885	416423	559932	469591	562268	490260	403130	495606	422413	441404	495017	437645	428578	418030	406982	217549	476516	560812	482825	379124	361299	505207	505746	790607	610349	0	485944	376000	502590	487798	498237	547228	407990	441160	427947	457490	507014	448081	426894	441744	441071	537268	238938	425976	469483	418118	371801	452261	369345
502.44714-2.672	12101783	16043475	15442604	16197934	11476390	7675107	16281261	12509502	11348918	13880914	13936411	12373927	11315122	11249418	11941784	10765236	13861429	12350692	11287582	14924234	11970441	13180659	17066084	13169626	15823671	13420749	12585556	16707572	7888328	7294807	12874504	12791992	14229172	8168131	7951608	9364951	14655418	10636576	16564802	12118452	12164553	8089422	12659196	14536630	10731215	12750220	13955864	14104138
500.43256-3.108	315484	430386	426696	458408	300265	365228	426586	385706	399852	363876	372846	1068669	386704	352394	995595	393015	364964	383859	568231	340223	321428	309338	463122	346480	377835	373389	355827	341901	393446	697416	407388	604434	462607	378595	372167	471736	385474	425525	417675	397701	383034	364432	629919	419555	342367	421909	1485285	385661
492.36868-2.462	219442	215806	315491	310299	300227	268249	296731	431507	208436	213870	261400	217096	333546	143376	311700	222672	219024	294465	308918	210644	286124	226513	224509	310249	324130	209398	423467	341897	266078	226622	1480662	274599	326723	341936	219447	516325	239141	235365	280110	249216	344054	325131	615018	173911	258198	219721	235195	150496
516.45935-8.587	146771	304606	276745	207941	219884	168222	343378	230268	187180	300453	231118	235192	478814	241075	235332	225104	323965	198378	172738	136069	308139	418196	282911	185163	147219	256974	228821	306356	179821	514312	254460	122133	224098	282977	1207152	240452	172346	142984	201917	231047	172043	176381	192918	269404	286057	289040	81604	277486
514.44324-7.392	208453	248091	148521	444776	308984	203522	256561	280275	337642	164074	319795	229200	536994	456770	299200	254445	156601	279972	226631	196986	261650	507130	457598	228759	293415	280680	368958	268009	489119	354156	547225	289917	450652	260880	517137	309479	277674	304491	541136	601130	286750	232461	180138	520068	335658	383848	621306	309541
506.38422-13.198	364816	352292	133945	140007	197623	115128	330108	170425	124984	119881	158642	119405	121511	470762	110089	469971	122542	409914	150812	137811	116725	202744	513770	831021	0	173554	153785	127514	147660	138393	126416	334492	791462	668719	152177	1006262	161206	418141	208785	287240	271189	273619	169520	508647	183273	202806	161398	347703
530.4776-12.616	214774	215528	200732	304633	171483	178097	322054	177098	207022	241577	180918	154838	162999	186422	157111	174800	240395	785132	261248	166515	287486	290547	238387	194512	224124	208931	228979	268176	152189	178270	206126	259067	243508	305785	315909	246707	226283	154786	239915	191857	170716	238383	247890	225240	184558	186469	458730	252456
528.46478-7.442	367148	362522	256955	716779	319338	199243	219709	397887	347178	287293	328367	228252	314834	964334	602589	235987	275507	238783	174409	180889	669324	484594	275760	219826	196259	393066	199379	427284	444924	290236	1042601	486862	239653	358874	836422	909575	263929	484352	763814	526557	289178	376282	893050	801590	475796	1049406	550414	509737
524.43109-4.842	399993	475485	725169	1479963	451488	455298	481279	2570882	414850	527217	801285	908970	615998	654351	405915	565168	577696	530874	2402796	641223	410388	574548	446357	813856	1208693	582221	592183	338184	392196	458324	394796	517451	539458	469834	808569	481030	465029	285844	412150	618297	2937499	520772	815913	458410	384283	594002	1052836	458604
520.40295-9.059	282227	289491	237233	433159	175034	165821	252704	213834	211551	218268	253298	280711	323672	142114	139928	190449	100578	78446	172393	215215	87181	272004	265459	206825	211406	228966	160064	253168	79270	100756	233745	246686	49092	246805	208618	73709	100151	188979	241004	195748	99992	161326	256910	213808	229605	127530	123090	287948
544.48999-13.156	466380	440289	133324	264177	720583	211634	226684	593904	233330	151579	554130	393948	412003	484132	156686	244182	310007	185563	1018679	561637	241046	578034	334612	328950	0	150513	139481	199426	148787	126248	442275	468542	700314	180231	583773	623126	716163	298599	100506	264102	432748	122006	250749	604276	531708	141976	517984	1433622
542.47485-12.001	163346	109395	135215	213150	44438	82510	146147	83694	127439	112064	143374	130929	179296	114123	217748	111892	189447	1050025	199520	86624	161300	198746	328009	71396	83412	144221	101619	181287	116148	41728	269777	178649	180451	369761	265761	305725	219914	100461	149779	169291	131797	125271	200601	113328	463055	108428	526643	135578
536.43445-20.574	278118	372862	531730	458882	315538	273503	457743	427706	357356	337608	571292	509490	509882	325383	368449	481440	306179	429859	413199	412162	544822	365341	387757	406943	416538	607338	505216	629049	295274	554310	408976	472054	331138	708740	461988	445973	404586	353144	310498	341991	276147	315622	389951	378493	450902	475864	514726	561056
558.51239-13.641	113145	59197	49528	233746	44374	212823	230206	162247	153952	224337	231858	215272	185759	211225	145267	40406	70539	579240	252940	129958	297590	268033	91262	252286	50123	116435	44355	52552	165672	166479	121996	157408	253084	183934	77211	212460	171617	53101	119618	111908	98529	81043	131853	176045	168395	164268	344702	51339
556.49414-12.98	657514	326788	325218	492834	317173	293756	246179	380378	417357	351544	222331	245663	271660	482291	340597	261430	191907	2269141	509423	340945	356280	299833	355274	209241	511557	302181	270014	539603	537963	280333	353935	993606	401059	591525	582956	847314	634525	232263	670979	291262	604445	185150	652221	413840	120150	173685	1921169	343408
552.48016-7.695	449597	387499	591784	701647	375446	337672	588983	750569	406098	586508	553611	522838	653460	422322	1047395	721887	577141	560858	357018	403220	536159	1065216	771094	604002	411809	475287	376134	369055	372029	541125	504067	566908	556554	368539	2636582	511670	740304	255506	368226	332942	148287	355606	517617	508480	687207	600853	1163794	809707
546.42023-7.51	595546	1516920	1527063	889442	568887	813602	1277114	583601	545334	670289	608887	601117	570086	665634	468845	630652	694061	611878	498459	656617	596384	735970	685334	602802	562235	548603	412549	847298	579655	536266	576441	522683	546945	522400	1667727	556303	494058	597330	545108	603702	490228	552164	557427	505451	577161	451153	534439	566764
572.52332-9.778	496373	677566	490785	477970	504518	558868	618286	508980	357897	427393	515393	568057	503433	459362	675623	528286	401553	600480	459357	522931	412064	608892	752546	502466	576973	783174	738992	863987	645394	734815	758164	541950	631369	774781	677653	807562	593999	652966	589406	809322	621159	589804	503152	719134	594302	633738	632001	573150
570.50952-7.433	219361	349569	225925	226994	299364	192502	732655	398333	229500	562076	227850	466313	289812	609011	240938	224954	223072	221125	200788	195556	722063	226035	231273	661064	184608	224097	224369	355248	411073	227131	408710	436463	243110	248635	479394	771876	401781	180005	236650	848808	334014	546509	421817	292558	729357	129965	1124906	234239
566.47009-10.334	215115	358554	353752	268709	270221	176907	237967	248745	288907	281113	298929	349654	414849	209654	385876	331924	202251	248264	366578	247177	487947	403069	261437	312968	182143	235892	197276	341823	97664	266408	209766	364699	217214	236956	422893	505012	218442	241789	272913	232522	243623	186183	286468	330742	220407	284616	998826	271315
564.46881-13.099	2152446	1900767	2736318	2911334	3890190	2149630	2342970	3384722	2240232	1869842	2443390	2399019	2212739	1783448	1868707	2039607	2025928	2703374	2717250	2389622	2182804	2003895	2664464	2694726	0	2973724	2538377	2393955	2711790	2633954	2432429	2445512	2903825	2999288	2303323	2824146	2639423	2987282	1880957	2414548	2701979	2188721	2566847	2571502	2780783	2277469	2445440	2922916
562.44922-12.924	662563	627412	546556	1071324	608800	486133	363688	580829	532342	539983	548941	510433	586021	544760	677559	271981	644921	2121217	683107	483352	597497	608239	886944	557120	769839	713411	683783	418826	738016	643290	844806	828385	814285	448416	806017	1002831	881720	690859	726830	858769	800103	415042	441944	742396	370563	670527	967495	377065
560.42114-3.106	880123	1125253	1052943	1019471	732598	447978	1055370	1748374	474109	523821	500434	877400	870725	803134	467271	410194	527427	457323	422174	539805	864326	527273	1134237	480496	569448	518897	860368	1074744	461429	797048	471204	2252401	536027	479960	461833	1571494	552277	797084	1008326	887728	877928	526196	527323	555708	755296	888589	563934	975934
586.53448-4.787	332430	207522	379325	202917	268274	385913	349799	168720	304347	328825	301395	305564	204045	585637	342633	149557	184989	369502	281286	791012	1061353	359537	533635	379312	398528	382103	401606	440805	628548	193286	373887	332529	340244	688367	330726	546364	370188	286728	350473	174173	374159	228770	345258	388675	293560	341746	438386	342738
582.50952-12.308	19479242	17689908	17931676	16986526	20340416	18348964	18492228	20145472	16538542	17531142	17270880	16211016	18289890	16055310	20802036	17756210	18784944	21941722	24406326	16209304	15117521	15234078	21855838	16837290	22533594	27101520	28686786	32679318	26248162	23946440	29705988	24784722	28939030	29886634	26405246	27341482	28998860	26050370	23712302	36997080	31041750	31775318	25309948	25718998	24566650	20552566	23425490	24410952
574.43597-7.562	14608589	15025911	21043850	22744146	13886392	11731085	14227714	17478684	13648389	11420400	13963448	17358294	26130658	17594434	19141906	18413110	19706400	14111653	14945474	10585399	12111689	16768058	13868637	15535246	17600076	11026128	8008651	6050548	15201498	15391049	15113413	21785700	14039749	10435806	20384642	23764750	23596606	4759047	16009481	18887722	6394852	11065486	26256348	18646258	16451323	23781282	50705044	14436189
572.43011-6.391	382220	402190	346969	435738	380628	286769	414921	352865	304438	325664	301356	323719	447568	350222	181741	245323	193695	361031	293442	171236	458881	353528	398211	293177	432776	421480	296576	338732	1585961	352634	490768	477853	416577	334907	460152	413182	402362	283287	173877	358774	230412	341756	567986	415488	2309254	535145	2440242	418677
570.41766-2.214	784323	2019636	1031914	1067063	1565567	758338	3844766	1405424	742092	1031769	712664	1055785	561490	839118	2947671	2935190	425787	621641	567521	1285829	687777	1270388	1874424	885586	928054	773135	1048214	830225	749841	611591	1136163	867561	904737	869179	685937	687166	873469	882854	936425	1060151	890185	744654	741524	888908	742068	861174	830740	654910
598.54053-14.66	268734	230407	122497	564570	88818	196024	130430	91984	119300	91296	82215	197708	298764	267268	118551	94012	119727	325933	211482	156977	375418	122647	191646	96298	116796	141285	130648	89479	167004	224145	97341	114820	183489	74805	183191	229244	117775	218532	99641	79459	251290	154842	142944	212067	87703	232554	415829	89715
594.51392-12.431	2117768	1661482	2666190	3077548	2838917	2551092	2877882	2458528	2953312	3210856	3017573	2707998	3816680	2616944	3320082	2469624	2127433	2488500	2655921	1335838	1828246	1506361	2790702	1399039	1752426	1846797	1462503	2099170	2378415	1458071	2398502	2431318	2220512	2437542	2919544	1985996	2122292	687139	1566856	1990582	1277529	1609115	2170028	1460878	1852328	2111154	2663518	1960184
612.55542-16.076	4257960	3280828	3960694	4375160	4076623	2779894	2625324	3613260	3483829	3138193	3901458	5273745	7369506	5933284	4165418	3364325	3790221	5580174	3050043	3808236	15164734	4042146	7091045	4164888	3688975	2676485	1601293	1269905	2785476	2474805	4287932	6876053	3007886	2424699	5555419	6676405	4448549	1743400	3572480	2849312	2637374	2595012	7471584	4485180	2829942	4642209	14544538	3374159
610.53979-14.771	119249112	114128816	123075952	127939040	177581888	147756624	117155008	120681712	153547536	153169968	138000736	123984336	200401584	256736544	200251296	145742016	140985616	120937264	152190720	105405464	100964424	253676736	117887448	171464208	0	98897376	85143224	76734424	52367160	109210120	94985008	85637880	174657456	106712008	74078096	148118160	117996208	120182992	73351800	93674992	84999256	105882480	95905888	175639872	123889880	107586288	140210864	246014960
608.52094-11.505	768073	660206	1114616	1363504	1093758	834242	1044305	1015570	1030434	1079619	1068324	1134773	1545421	1018532	1342038	1016588	1116470	826170	927081	601062	807382	685357	1195608	623689	784811	783583	523321	612725	1004784	649137	810284	989566	823443	750199	960162	871297	909135	352830	805204	886224	558916	692822	1010914	643990	727278	985188	1410994	820212
606.50977-12.31	149631	126615	198723	253567	165530	285025	446226	77796	228062	177413	381587	441346	1033301	244810	516591	227723	279493	281347	398319	82636	1377039	198980	733548	116117	175642	699264	152553	80639	400808	102877	443732	161625	185994	415090	344797	210610	523492	50591	143727	390287	108404	186440	199665	114397	191564	366107	602129	150904
596.43188-1.373	874386	2885871	2728004	3017566	2955604	3080677	1510635	1596829	2906929	1495762	1530813	1004560	1497041	1354888	858302	3111740	2757409	976554	868976	1749549	2981890	3128831	3349720	4137042	973864	859712	1176609	1451373	1206454	1649152	1025072	926409	1047498	817686	958850	375713	1069123	1796192	988427	999682	877048	1007037	938328	1623346	949294	837529	374004	2005309
628.57727-6.515	214016	33287	151782	96943	90643	92550	87680	108712	90702	83228	144369	60917	179088	107636	38866	95627	159407	173574	84566	90698	39357	241383	100513	88854	188928	231210	250915	254987	213568	113727	238533	829877	464439	253666	616596	1816507	278933	106648	247816	286600	236920	216595	398952	495020	364601	526089	866617	370650
626.56842-12.431	939880	1139362	1064814	1187097	1020684	1135252	1388314	1019093	1278905	1199511	1343893	1381204	1371637	1091688	1217126	1140913	710872	1123416	900956	972724	1899367	1020713	1728668	975146	741281	1091482	748808	805117	974143	937675	813276	1105473	1016733	1029487	1156282	1071614	742494	734107	903690	901542	661340	912677	1225088	1048268	1284544	1101085	1563156	978264
624.55463-15.581	836126	1141713	774138	909152	821642	812226	1305219	1296077	1248444	969470	1035734	1393796	1637161	1146371	869901	1012396	842529	2047790	1048049	887071	2342495	1063507	1461598	1083744	554292	744948	666062	575894	748034	726829	832990	1237242	702156	1000841	1348648	938700	1018674	568000	702890	802031	823527	773613	1341220	943525	973651	1045451	2109436	870600
620.52557-10.219	684231	629358	629004	804853	759187	618090	564140	694450	640733	672297	533614	706473	785619	772233	743720	623059	385111	674606	616116	497942	1002960	622039	813078	672836	239150	571114	405784	599669	610733	622841	705524	841190	866343	625172	1002809	386444	453723	479505	701102	742984	600895	699218	803614	777351	846784	764612	859514	691070
642.59637-6.448	245556	23158	57730	89032	80602	146751	173065	53496	71794	56189	60249	47622	67544	84311	25364	123817	52108	70753	57697	47090	99357	52318	96164	25909	487208	768960	929066	905930	179836	403777	1669326	1117159	1343763	1753210	4038434	2640330	1127692	587756	433242	482634	276552	603804	1906964	1176222	915187	2264892	6166862	1509004
622.44934-6.577	359426	385874	380355	249854	315902	416271	444542	692354	861654	609119	719265	904548	716763	260690	472642	429122	613904	797198	686611	952733	929960	448001	1534852	620637	620059	808769	1289864	408863	649588	1070036	414946	919556	709279	370345	1031594	1528998	922793	464920	907535	936022	1455640	858681	874636	727890	378732	506315	2763159	401963
636.55725-14.896	8563251	7964706	7752149	11566433	8781390	5662656	5940307	9176894	7851837	6037833	8619002	11556691	16560257	11962798	7066120	7851673	8903272	7710190	5733368	5919550	64470704	7294778	13708970	8317860	8073303	5527640	3389318	1860071	5808541	6226344	6600484	12269588	4946264	3447964	10197438	7807810	8818357	2832416	6820774	5975286	6352329	6171756	13342930	6634185	5683508	10001563	18561164	6783192
626.47894-5.464	548346	484624	622793	657071	382313	512009	520291	646189	536308	519122	570360	715098	495500	595860	836757	826616	987010	972055	674919	427309	220631	350755	935042	684079	530501	743291	607580	842313	421727	827484	763481	626617	603597	492204	752170	748551	611595	546410	617159	720997	567584	437524	663270	652486	620317	306520	712196	712130
656.61823-16.382	12648549	13138294	13663595	15275348	8515832	15411525	5214621	7768907	19836758	11990558	13030934	11242576	16372521	23009796	24926570	22676486	9351328	9239288	3547728	16072314	9026235	13331826	34658796	18481600	0	0	3666578	14444021	8337296	10736653	12726066	9817102	10050493	16886888	15943961	8823564	13433930	14783210	12093307	6241823	10639216	15603069	6614993	9063193	17823972	17444122	19973252	15745691
654.60309-13.913	1364449	1723800	4227402	5197984	1474783	3591102	4484045	3880964	1842249	2148449	5728973	5068890	6095726	5080995	4392272	3512135	2603023	3795928	3223254	3638472	5300492	4015440	4066219	4450906	2238610	3109384	2157136	1764167	2911366	1836183	2681094	1824116	3198186	2320702	3504770	4119616	2714851	771548	1336784	2733848	734487	2378128	4416118	2690175	3681280	3946852	6215052	2578153
652.58649-12.484	5787438	5684954	6577117	7564336	3442513	6440750	7035538	6884396	5814070	6795988	6601018	8259956	7660406	8426303	7292794	6947008	6315540	4963587	6686353	4906632	5467886	6628919	5487686	6811848	0	5003476	5582628	4797327	4702538	5541279	5205757	4819204	6462986	5396975	4137440	6009986	6050629	4673536	4029657	5223022	5517487	2215660	4947490	6022164	5304782	5263592	5560530	7905956
650.57269-13.159	1255305	1477622	1403978	2130379	1602930	1361983	1916672	1284579	1180049	1424438	1429747	1368082	1179602	1463906	1094532	1087894	1247025	1407757	1404126	1330544	1192374	1430409	1322644	1515134	1421574	1422360	1355970	1664208	1396967	1345695	1320248	1436431	1708365	1427937	1428213	1353260	1432124	1311868	1281058	1456996	1791702	1509531	1212095	1442850	1384918	1367204	1263589	1307690
648.55719-12.673	429111	368622	486433	436663	474247	409140	507864	406413	392973	444146	453849	367326	727113	409185	464991	472069	476858	427259	369092	334794	667056	418682	556137	440507	517469	480638	489667	508134	409576	442431	494403	483516	556588	502975	524158	542942	515825	347669	880249	501926	414225	465429	474008	465570	495815	472498	895377	495355
646.54718-11.512	338419	284410	455606	212431	507543	360519	418472	350760	427841	378292	420874	460469	311139	471815	431222	459299	489819	367472	305673	201169	392713	280305	447601	324562	162992	287965	240955	238374	145477	292687	366187	485575	320834	298915	363590	164615	335427	162589	149258	344895	239107	273116	238423	143796	339953	439993	309230	319575
644.526-10.524	318915	329946	320726	407274	362292	273108	250002	309240	336833	307021	278330	348627	486103	258392	444558	260410	416681	285921	295174	222467	329110	322237	411829	235692	334740	223430	160753	284824	291684	271561	338378	379687	322564	306842	264126	328730	360129	193393	306806	319188	222814	190337	370324	283538	366928	341741	691736	297573
670.62561-13.955	780493	770309	672077	689770	660857	755917	780718	561585	833341	585452	856748	930704	761498	709445	675434	752188	613516	932851	610861	989501	891929	738167	658243	682702	731448	586339	681664	664815	593365	792716	275188	693754	654791	696315	742618	899683	646216	610528	895271	647598	543091	705228	665648	914652	669978	332584	901245	672101
650.48895-8.418	391913	349963	581842	597816	506788	558911	940660	801656	634620	131976	611549	775829	827071	823503	178991	672739	709900	692700	170075	150345	857512	1205104	868336	676906	172057	913285	697672	738821	551777	717705	899029	839682	640591	891802	846099	1010458	438618	705888	758753	753433	293473	875255	872247	837080	1165728	604671	899398	1175109
662.57092-15.33	1848940	1744972	2571964	3377081	2345258	1257928	1817595	2502174	2191791	1809712	2165811	2509416	3815211	2304518	2149761	2587216	2843296	2090244	1717489	1319963	3120716	1844073	2043858	1933051	2527004	1657304	943361	427686	1889318	2047622	2119264	3204469	1889120	1219532	2418392	2698104	2891149	543765	1999168	2148413	1785568	1648998	3068888	1590517	1671490	2636330	6048296	1665490
660.54999-12.674	1380939	1023493	846314	1345412	1503835	1142451	804001	1007043	1235131	1150593	855841	970515	1729667	1449738	1024759	1059632	1116874	1000307	779536	657972	1689678	718174	991936	713103	1182058	892778	739158	462226	1137904	956305	881808	1339254	993280	779184	986377	1302301	1322833	595525	1249700	964726	963433	860251	1161904	817232	734042	1101856	1513997	821942
658.54486-11.635	763378	626001	788029	630092	736819	413128	742492	514732	663794	712953	478587	646135	863814	699812	564331	529726	834205	542292	515245	422347	1108078	461241	563017	503426	633699	588886	352274	205681	1014141	476526	883422	880750	806100	250856	840438	952604	1461748	532997	1069259	755081	799712	816167	912648	820892	491888	894925	1147883	862720
654.50641-6.579	638640	526120	532906	840698	679701	419862	645270	596474	735449	415321	479654	1044398	790433	949372	555801	535580	547184	899498	626784	272684	754933	572635	575018	799660	421846	685442	422855	496621	641076	827716	980483	900280	796022	728799	620295	624449	567256	418896	655420	620891	562743	449579	1012745	834267	783810	1339870	1607770	629174
652.49292-5.464	873212	327706	264604	639054	204608	191579	309765	260755	252943	236353	294167	388695	363646	249081	2836062	233957	376748	298576	280300	251054	383779	260577	297183	261150	614073	1013711	560787	923262	916298	762436	929231	1058904	925717	1082604	1273228	1109075	1156564	640494	635386	979762	648328	445848	1026414	895123	1141969	1440901	1580487	1297714
684.65222-18.045	31477856	32896864	25937612	33248148	14427870	17486368	44892932	27497936	28719992	17520986	29004230	49408648	65949604	42987760	23764886	23445174	13777281	38914876	21194516	24933230	91233176	44207544	35269912	34995172	8922155	31573024	20899438	27305550	28947828	31655684	28444380	36736580	35347336	23615258	36991016	28709984	30603714	17595506	23321282	42757744	16394942	24448004	35569528	34678536	50947308	35629832	63803520	24677400
682.63251-14.783	4364904	3913760	3161739	4659838	3363080	3330020	5000274	4113772	4281294	4945962	4563200	6110380	6212444	4909372	3338739	3477388	2541111	3324315	2577056	3321078	5389488	3609570	4395960	3960092	2226197	3492940	2717854	2696898	3331271	2706515	4432159	7151055	4590482	4929610	5905205	5666423	4103569	3394532	4335671	3339230	3445646	3195902	7995966	5729364	5888840	6508662	9549823	4770710
680.61694-12.002	7414546	7439100	7826431	8002426	9516630	6986592	6901053	11794413	10127005	9049164	8144484	10320460	11908908	10141695	7200934	7043258	7836289	6194334	7851038	9694330	8268554	9144482	8321214	8494449	0	5285312	9880001	7716823	8761789	7585374	4871920	8222397	8829402	8762445	11504652	12100514	8533915	10164376	6925514	8497676	9321387	8298064	8697393	10195606	7466024	9647267	11279125	11018881
678.60315-8.563	559593	906555	474320	593683	344765	285022	1372724	1116269	634690	438883	811265	1297328	933571	731435	517291	623286	366101	990053	695618	647786	766486	1205379	582465	1010108	245399	680260	469060	666416	486730	1071207	820128	753598	698919	715008	754762	766988	693031	530008	732378	1353250	415444	665518	917768	995232	1260714	1495584	1284856	942015
668.52618-7.521	748693	258845	809566	740279	663414	631332	803369	833101	738058	348200	448487	555412	893859	516937	552447	466642	492291	511867	451486	429461	1162888	769658	877063	272929	469109	568694	275137	444870	457967	447395	985815	932572	854370	294728	622068	1097349	860633	656855	886049	1106930	729402	827490	947630	544750	555821	627211	1270904	884706
698.6618-18.905	1031986	846579	1284846	1287109	566411	644270	1717932	1216065	1054536	357286	1032638	1130870	2819532	1299712	1509962	1210674	972139	2034865	952811	1275025	4953504	1303589	2098864	908915	445955	769990	578402	553053	648963	1154331	801843	583395	549221	535447	1086665	738062	772907	260460	534248	897460	212179	455421	593168	732214	961513	778373	1249829	512278
678.50958-8.555	707374	1161713	753110	697043	431702	336183	2019268	1220612	746418	543361	1000913	1739613	1271255	749664	686288	690785	578874	786244	764240	905856	718438	1476696	809220	1060536	433950	720741	532810	758440	541190	1243558	954219	930484	729387	790839	935342	871612	814080	689644	844271	1453590	245941	773897	1013773	960702	1401794	1573602	1400749	1335874
676.49426-7.135	366442	337524	371309	322195	343231	298887	1060345	755095	395818	313519	717140	484421	638359	397835	507536	413444	365278	390515	725196	418110	425771	879104	436049	345443	336654	482643	337840	833708	617299	1519716	857752	937431	847903	744061	1012165	923896	798018	310513	470908	891291	321221	845943	2169719	883865	1036936	2232064	1482829	1683678
692.50708-10.109	390426	581637	619269	1183068	202810	424259	726271	1498272	187659	285096	828747	1420145	525385	619758	61830	466961	398174	1281442	557273	1177325	523178	1421248	243748	1037176	1059989	1589208	548571	605408	682893	627232	1040468	598853	629459	804167	1423092	808486	1660012	563624	564974	1442469	798132	676717	607793	523907	682566	1662948	2208499	1177448
688.58453-11.944	1836914	1913656	1644352	1812366	1599080	1639783	1765876	1803822	1604350	1679671	1608238	1377480	1659242	1395467	1999247	1605212	1622470	1753420	1548537	1173221	1541126	1535273	2261524	1475415	2183913	2219468	1995447	2578786	1745010	2354302	2186740	1951254	2068685	2043794	1838435	2212962	2151470	1782486	2270559	2652039	1929343	1978977	1934607	2173996	2012675	1863428	1931336	2169060
684.55975-7.382	1625788	1312260	2105708	1923772	2312471	1271676	1501458	1970884	2254026	1893300	1610212	1814682	1939426	2156054	1284505	2149467	1744499	1944056	2122526	1650229	1737988	2632407	1784836	2397872	0	1602194	1813662	1493861	1859766	1979528	2282817	2226989	2487532	2130918	1839066	2007759	2145506	1736401	1252865	1207190	1832450	1382586	1400546	2142733	1989959	3439763	2428079	4738478
682.5296-9.236	821465	803312	794357	548913	661591	496561	663484	888171	714180	289482	561877	657923	773758	1134194	642141	446133	432206	885268	644560	432926	621723	938831	318890	493583	677390	574209	357244	219279	846108	462484	783120	924514	684682	766633	624468	536575	512451	312670	740958	791770	708171	424333	665661	723290	1027154	698613	955272	507922
680.54547-10.524	3652448	3393337	1914754	3805780	2302904	1748949	3679354	3996158	3442672	3179883	2853322	6208584	4711919	5062994	3125956	2294897	1782118	2856289	2335886	1961403	3117353	3339670	1272132	2663525	1676807	2578790	1876671	2393229	3770072	2483907	4045892	4949848	4999751	2699269	3562479	3649020	3316842	3192043	3554318	5617826	2742594	3034663	4039678	4977055	3231516	4429644	9070430	3080448
712.67682-17.187	425426	463150	486025	463669	620468	456599	385974	523395	498912	446830	453171	453641	623059	652906	542890	436445	460981	440525	451558	407619	384074	692961	412622	467106	0	270532	373972	267380	287840	311626	321741	474531	661421	335283	426627	555355	532358	440886	270392	360670	407191	280878	321012	582972	434379	505181	579445	980162
710.66528-17.182	2665269	2833422	2575326	2560956	3554474	2654698	2242749	3132275	2959243	2955345	2604135	2797992	3899755	4246997	3332641	2343680	2696253	2304381	2620613	2390193	2216102	3827525	2236365	2818476	0	1435134	2165763	1415127	1529728	2062448	1879725	2884073	4071629	2271877	2652819	3493858	3136316	2507596	1569093	2295647	2397844	1785291	1962969	3729628	2965369	3370376	3883262	6307853
708.65094-13.347	855400	1057369	607026	1342750	1182693	580648	1427912	928047	1191232	1223031	784453	1474129	1522719	1139680	506474	643468	669707	741647	1049512	614085	1513133	1112799	788366	996627	822626	727541	539356	653810	657467	517887	799653	1485252	752374	1359923	1170789	854772	891956	1065897	1077963	763001	844213	646503	1054516	814582	1364830	1210410	1912737	934387
706.62988-18.046	3280782	3000969	3368468	3755059	2067699	2168547	4417778	2983422	3316743	2391608	3692711	3921766	4726691	3645538	3659648	3182917	2773908	4415544	3653734	2845910	4749132	4766595	4161708	3438808	2284564	3823833	3339580	3392282	4009318	5124358	3666028	3227486	3922872	2475634	3110678	3405112	3593878	2007654	3048060	5746834	2291047	3306566	3233385	3358766	4984574	3379834	4390037	3119527
702.60925-14.393	519133	345795	760956	1022801	724590	499367	647646	579255	632175	904858	691032	670252	1357439	808568	1026413	864983	929160	597557	600296	326897	434260	409560	764246	421204	469542	384157	218964	224769	414440	258305	547474	715686	424774	363471	537866	656635	599228	261858	530696	574557	283948	358818	825048	398243	483604	684238	1313599	537010
700.58209-10.722	4232134	4467043	3955031	3962330	3524982	3282105	4302036	4658662	3483277	4613898	4800775	5193159	5135052	4499487	5360344	4206164	3951806	4030278	3228008	3628406	3341858	3760486	4713938	4458236	4696718	4352017	4468020	5181698	3865880	3706612	5496350	5168534	4323544	5229839	5686391	5359618	5039906	4320544	4124975	5141754	4723722	4471048	5711244	4520492	5141030	5460348	7346635	5431596
698.57581-16.811	589092	42207	32287	40416	31463	24869	41443	39936	37274	31200	75399	73150	52192	51024	36996	35922	37028	42703	31836	31773	46821	37367	49667	40356	249805	1257299	777927	1229757	746413	25147	1439841	2067137	1476295	1995483	2126323	1290256	1158144	802218	739807	1109398	737356	1291296	1652141	1463028	2005082	2039888	3456584	1559155
726.69995-10.702	811346	748528	815347	730151	837566	661486	998467	846038	763511	741153	679167	1075084	449319	830920	880868	686665	628479	1019229	894422	690621	567493	931057	1135233	757347	201291	1090065	1014384	1139502	902373	988561	643101	953374	214494	980938	1064389	1118725	1071712	693054	207192	1171436	930765	847303	363715	864380	384856	891745	851825	902513
724.67847-11.576	1258406	1098945	1025583	1360056	1262782	1039111	1172465	1266119	2065775	1320230	851108	1304918	1532585	1841027	1338955	1274884	1118475	1504379	1232089	1032367	1773955	2387286	1327181	1131572	1052085	2494603	456525	1077364	1303470	1331526	1559554	1449182	1211174	1221629	1457988	2314864	1379289	1150962	1411398	1509755	1929337	1322135	1791048	1452970	1817606	1745020	2688380	1234118
722.67303-11.574	689469	769594	119575	169802	129275	100942	532614	222220	2373500	186064	177955	470685	837985	263773	222723	186181	64666	206800	709398	793469	655532	3993392	1412053	481372	67601	3467866	1139787	514154	619832	624678	745218	796861	644107	258947	543592	1219960	224411	944413	550337	1784176	375586	398201	1072089	647967	2459510	868129	645647	493178
720.64929-15.003	824480	972903	537144	861930	363620	446597	1339853	939721	839743	755031	967024	1255687	1038092	1066568	615179	625006	416415	960320	774709	709899	1380590	919667	902151	1043105	383800	891028	588356	189802	732266	258238	1005229	1094773	914364	918340	816512	1195678	567392	637334	967057	1113320	493164	603494	1193625	1415089	1230798	1618840	1566224	987485
710.56982-12	1166054	1062480	1594419	1650305	1231964	1215121	1092323	1810320	1419729	1375163	902704	869429	1818696	738351	1853710	771246	1415811	1697158	953717	911644	876148	1524568	1927312	868244	1507962	2226584	1510160	1737796	1274461	1099442	2637168	1487452	1366849	1216015	1454062	2176542	873500	816590	1280394	3120664	1618184	1026609	1302611	1065409	2868988	1558652	852263	1184615
740.70825-17.258	440284	409945	431161	641869	257237	368774	702721	614118	477040	448750	622083	901364	789584	723832	755031	498465	342388	531870	454185	583832	1045551	618575	916154	734960	174064	908186	316140	348345	275203	350898	567330	550970	551372	355599	849989	478654	400756	255753	414173	368771	341293	238395	421171	478374	690980	669664	846996	385910
736.67517-12	464431	430458	584911	1071460	698520	642363	543045	951449	381446	393923	448605	397806	414214	463688	409421	751384	601802	726215	357647	400351	460535	512658	747526	1054248	848899	621781	769502	475567	507409	402509	879478	359492	560962	544889	458766	441097	587306	370805	626354	562502	692352	747029	453417	700435	559662	408954	484412	699637
734.67108-15.019	651719	683119	1396029	1611604	1247339	677858	1655426	743401	749866	584340	1159636	1170667	667282	674849	739818	800461	1298048	810759	733519	784106	681698	920676	818918	1195696	1181587	1265614	1030146	816103	1024908	799813	842635	776059	749378	582556	823187	1320452	929459	739049	1181766	961431	564481	818201	732554	770160	637095	754146	1554475	1350666
732.64606-18.043	599071	615595	346691	587386	849162	380826	509139	433606	489473	640355	563654	498534	479971	456786	661161	437757	457476	428165	693942	439071	386416	711505	473849	621704	0	362735	605349	395568	286017	396488	466278	711602	574844	711696	401021	453310	566739	558271	397408	611454	709119	545585	338871	555213	634709	517024	550249	1013523
730.6322-12.615	2084568	2509219	882178	1187374	1402037	1109625	2313870	1855061	1812889	1215244	1696452	3382274	1823131	1618846	866344	1438737	1439870	1225773	2243952	1411537	5067025	5898640	1527470	3695238	669374	2253661	1711184	1645830	2298480	3125637	1551774	1771561	1918330	1998885	3518005	2242518	1796012	1768255	1898214	1783576	1942422	3182171	1564333	3144097	2043632	2416482	1446238	1817340
726.59772-10.715	3644675	3461900	3396004	3038094	3445455	3115768	3498201	3495789	3047736	3129738	3316858	4028038	3697732	3021251	3869863	2907924	3197917	3263460	3395207	2743301	2666206	2988397	4066174	3268431	3637677	3783265	4048443	4751283	3358364	3911029	4804202	3888197	3961241	4477163	4353333	4446000	4229548	3525734	3599196	5520408	3845209	4086614	3986204	3858909	3431147	3873806	3890960	3988530
724.59296-10.717	42456484	43312416	42015980	43119688	40093900	43416488	40072420	46527964	43173828	38701864	37121304	44508088	50347304	47997700	36963444	47575968	36595148	39070944	48186908	43766552	34796092	31616254	36683588	50723048	0	43285052	49270500	51130436	59282860	49700756	48919972	60118352	49598220	49483748	54664840	55577480	58777128	52693436	52348204	45907592	62407316	55027240	52896136	51468796	50396696	43069208	50488484	48870896
722.5722-18.584	3299541	569261	358417	2508700	343556	948654	771091	841284	613482	434777	441793	743426	612448	494834	379936	398605	161954	550732	223541	419401	894721	774100	726561	479980	3071148	6164090	4406028	7166806	7024092	343712	6527309	6479471	6463425	7902698	8126431	5743130	7233104	4108625	6168879	8244417	4454132	6833544	5941796	5975872	7884184	11638672	7558685	6405816
752.69446-21.346	2054002	2838358	2338659	3143885	2039900	1595196	2407636	1420288	2645691	2878806	2949871	2830282	2755175	3929478	2476540	1585715	1740888	9751701	2809325	3770576	3248694	3499991	3185367	2522716	2364226	2524077	2204465	2470784	2005859	2021105	1798592	2428290	3004193	2551749	1346967	2367658	1155569	1867433	2859729	2547836	2935698	766278	1669773	2935736	722350	2661786	12178876	2708953
734.57422-9.419	863330	502772	463352	598858	498610	394419	378725	568008	705763	733509	601612	708532	754470	799206	600565	498879	473044	892265	302264	470888	860249	480483	252987	599980	357784	387370	301428	348833	446866	281264	602500	999250	414473	335738	695186	630001	624917	270252	584153	603765	500670	314689	811208	495979	623484	712939	1074542	816631
730.54089-7.87	1369512	1275797	876009	1747217	721850	547634	696896	1396222	1188598	584209	995362	3341569	2797956	2856754	919788	1227858	881254	2535616	1020451	1150451	1837703	912151	822100	1620432	359180	1287804	969168	1166037	1176968	1896384	1953239	2678934	1788648	1668137	830974	4582984	697026	957443	1880169	1955101	2582570	581549	2855108	2591346	2024910	3075366	5893850	1047952
750.6944-21.382	1553087	1801857	1920060	2646370	2025791	1874756	783353	2418883	2298301	2384765	2498900	2979797	3217358	2559405	2615948	2378330	2360396	2500726	1940881	2121954	816558	2277538	2934666	2116957	1821896	2303021	2209381	635222	2354459	570427	946125	2643381	792541	620212	839439	2624313	2278140	420253	1826648	2336413	1683896	1950008	2797971	1121852	1306190	3249443	4085497	1075939
748.67975-20.979	728006	293355	356987	1529562	1081606	922946	769749	1136969	1187416	1397653	1248426	1526740	1598978	1211211	1439457	1126450	1399158	419557	1097314	332007	310952	415380	496300	327513	357060	981567	315237	779217	1062350	254930	1057899	445215	311504	843983	316920	416482	1030098	190342	586163	1002893	241582	271496	1184780	332771	1028256	1262241	788192	910957
746.66779-17.12	277558	111149	104151	102369	85805	85334	121960	102385	93028	73287	200873	128431	142195	109420	130191	133253	128245	99906	101005	96832	142810	147175	126529	109161	206783	535752	473667	571801	307601	108480	564317	498505	402669	553695	789948	360598	303348	257410	298033	620929	377846	567031	422332	491196	790348	504148	453345	610991
744.64795-18.536	1203925	1205198	328213	1011197	783128	575938	654186	1104698	1215708	785868	1156187	2090575	1516097	1284655	755666	336190	362935	961201	1110284	651179	2832842	598598	531730	1209370	652945	1431085	921851	979358	1347439	1045468	1453696	1834841	1431651	1667124	1960890	1571052	1397349	1106359	1390159	1425039	1251136	1232453	1831885	1537848	1737950	1818762	2203178	1371441
742.62866-19.325	363776	203756	168220	287341	253098	163734	142609	318889	129849	235352	151208	224810	338697	393531	104941	286529	107820	315571	125523	160685	172165	126720	116859	232838	196592	459893	384529	522459	306004	128933	584043	552039	379691	598074	750833	508828	472323	336006	334204	501495	382378	403061	527116	497003	599110	531492	653044	389865
740.61603-12.431	103393	150750	123147	66128	140345	70257	99090	89409	106469	90247	71301	79580	88745	83755	72592	96798	98324	64804	70323	78056	159610	216824	159424	142031	81364	690341	92470	239954	77406	122710	94393	115654	129393	434009	124872	145524	97728	105473	98298	81234	128180	122988	116628	140314	532569	79646	72429	128507
736.59058-7.442	1033929	377338	729695	767278	315123	262419	1248372	691697	319032	720740	710612	948892	478790	447627	708080	865278	444904	384827	339964	289618	419356	863916	508081	1183616	895406	1289377	303042	282382	1041920	703140	370318	650573	618607	702708	719021	737822	1031340	435492	1096523	1115118	773686	316300	431877	1182462	465074	505860	566963	1206616
766.72717-22.613	1011098	1095263	1067245	1430961	980596	758652	776733	940093	1069202	1371648	716037	600671	473864	979163	733362	731128	907594	936337	498056	756225	535765	2332386	1343081	919251	1028894	573997	970122	643020	1224546	820908	1297400	649557	1167405	579150	539419	566814	593652	1086040	1063304	1511149	920453	906602	1117777	1257207	633142	1163196	676981	520166
748.59021-13.372	420968	486245	424598	643930	391789	323133	538852	656310	507580	415562	604759	631056	780188	605379	548382	438236	372433	527850	459506	204879	518724	472705	592141	419353	261135	484601	285637	240317	529536	525375	590136	692736	593831	482244	647146	555396	427270	274092	526346	732667	358224	277776	620048	556036	569657	815096	979384	498729
764.72363-22.56	1186830	2672644	2816013	4292264	2236710	2307067	3136872	2285979	2785297	3087251	2975615	1722986	2660821	1330276	2702226	2273278	2660142	3808385	2383930	2157604	2954654	3283174	3859413	2681791	2783438	2620622	2672064	2733651	2917356	2440527	2970496	3060896	3130534	2648470	2841558	3112757	2515891	2440754	2201415	2698214	2325862	2702879	2744127	2619264	2847574	2677882	2566584	2593199
762.69269-12.248	587285	680105	1534784	2052647	1707659	1459882	567548	1297554	662062	1705349	1589695	1188751	2641313	1740719	1011525	1571699	1636126	1174712	587077	1089127	2527531	994737	736913	2056423	1189458	684480	452463	404542	602112	628011	497333	1505851	1293461	822079	1746699	755742	1438873	1339499	1351457	551842	1599896	1565286	967578	686816	934360	1408607	2285997	1218687
756.64551-19.329	238618	278408	25625	53615	77841	61595	35953	61340	73839	59911	24624	46644	52722	75919	62075	54988	73666	84619	86101	70800	45263	74451	107285	82768	0	54994	427046	299435	310485	356433	50638	534585	654354	527875	559127	603601	396426	460173	308891	442857	512212	280866	511614	445667	514688	483994	524971	830547
750.60803-20.026	4371217	4296948	1882981	1296923	896510	987639	5053752	5230151	4300468	4006506	4459743	2387372	1517555	1816663	2438838	1069575	425584	1937368	1821834	1953893	4303052	12932903	6111146	1964920	4637509	6410319	6019966	9244192	3070254	4924414	7608960	6010571	3321780	6843066	8934650	5851700	5916165	4635449	5417566	7756364	2596244	11450288	6550016	3098798	11189964	3711469	5742559	7559144
782.76044-21.956	4305165	2379514	3972826	5393540	2583284	3123346	5106840	3547774	3844091	4317876	6516430	6143140	5560674	9820967	4936156	3131411	3119515	31906908	8788317	8451683	5299602	7769859	7975666	5494136	3812337	1736816	5210940	4320791	999584	4308932	6660630	8078928	6251650	11041370	8965394	15759726	8278984	2541390	8386340	3474294	5595106	6842292	10616452	7436104	1471218	1471919	27702566	4634023
762.61011-11.446	506167	757196	362773	570735	133350	272959	503813	363498	1327579	373044	434649	686448	563255	358429	510001	317748	288456	357385	498952	305436	796639	1718637	1431761	281845	301754	6700286	531032	474260	521623	601408	676103	437317	477008	330771	595795	625874	335152	279277	342897	601326	281851	304774	803671	599296	1975929	535188	454819	168960
758.57056-12.246	1256255744	1531547520	1529631616	2027917440	1522255744	1371216640	1221350656	1403108352	1484885376	1274493056	1341892224	1812865920	1942671360	1797044608	1189148544	1411656320	1807102592	1305782016	1288652800	1177819008	1601870720	1724156288	1560315520	1700781824	1381351936	825501568	796537728	562142784	1305750912	1420461824	1085711488	1973046912	1322556416	929833856	1764240512	1759744256	1606057856	1303512320	1309067648	950178048	1540875648	1123679488	2014594048	1738246016	1247216384	1718573056	2504093696	1218641664
778.73169-22.686	1290667	3093442	3041222	4272901	2462433	1395923	3569657	2701774	2970447	3504151	3261905	3093530	1553011	1471075	2815867	2686435	2977456	1861084	2533396	1355402	2641420	3399636	3372390	1676448	3020021	1461703	2964366	3331722	2962672	2621052	3272801	1689801	1865459	1629876	3091063	3005776	2903324	2821728	2654810	3290605	2754477	3284982	2883614	1522980	1617173	2928137	2844850	2564791
776.70801-12.489	300051	260733	365827	570350	505694	313433	359047	328177	387206	547143	320066	394578	505045	497835	540819	405538	257008	349561	457227	226623	333005	223589	392374	199897	250522	284751	269226	321329	395557	240220	320208	506692	346535	280702	346134	306221	290186	125234	258051	281250	217779	265647	430378	225289	238395	366079	442791	244414
772.67841-18.534	207772	137453	89330	90582	129363	66365	138999	112892	134368	121239	70306	166953	152743	144042	89732	99489	95733	121217	150540	82810	224298	171207	142572	122736	214041	386335	266579	328848	374155	101362	445476	419981	358088	423446	474805	387879	423818	214716	294369	448338	259637	346498	412710	360858	421229	449520	506957	384024
766.6427-20.565	185294	323362	242071	115750	186755	519717	283350	432245	283526	208460	231230	345475	103539	243973	265942	212591	95365	115183	92432	283604	1073671	357545	160188	261817	241750	193658	298190	411875	88999	208889	200657	183181	154765	195611	197942	158007	98781	239224	121704	420833	189117	119151	176711	157406	236533	240877	221030	115445
796.77441-9.972	44379	58513	13983	62660	32451	36438	46084	44400	46251	64598	51416	47657	45288	50889	67898	43253	84106	39204	17244	46570	61068	46866	46186	52540	55416	51426	34877	39035	37998	50051	67922	49910	19926	34669	48533	44421	37073	13899	53981	60572	20940	32417	20874	47295	42100	67922	39299	42598
794.75751-21.889	5884653	4563240	5188958	7398817	4549700	3957187	5213754	5419522	6493420	5775608	6758630	6181386	5896596	12642114	5455996	3310297	4169494	53208224	12102727	10654070	7743072	9117008	11484078	4750472	4727316	5269124	4286255	4127332	3375083	3885432	7710496	11301590	7757993	12631557	11770210	26092374	10377561	3959750	14778010	5382798	8238056	6132928	15264106	8106280	4106141	5384844	48538376	5951832
792.74536-20.537	597978	670368	779179	498134	585917	657997	875501	814702	646758	658232	822629	908798	1118590	866266	898827	699107	431520	1048820	744320	735035	659681	650909	1052360	761347	539387	1046267	771818	638206	751214	682439	840474	1074632	889081	942096	1040904	850111	776564	491404	762409	780623	616838	701452	979343	889466	979670	950651	1211282	845714
788.71246-9.976	397152	318837	343030	456112	416250	413106	359387	365175	415998	406772	375676	466254	435865	533230	400017	479445	390604	408189	383998	374014	356724	340968	465420	419648	0	493528	363677	181401	238656	289078	261002	461406	458454	337864	259717	359428	391962	444084	292511	332586	383840	282162	322606	585196	348935	358607	490961	552511
786.70111-9.979	398294	349801	441768	437691	462654	384833	305006	601973	472282	393246	710894	451147	418770	442218	484931	483289	458502	358611	435197	348717	419749	563832	476597	563136	424700	326815	190029	212864	445708	324014	450961	572582	414071	273908	481888	527636	605787	409499	431070	415993	348179	378388	604186	516806	439587	630077	621992	379396
784.67535-16.873	159987	40961	36629	48705	34711	34151	39991	35055	40381	31296	37859	45864	64069	49617	43672	36420	36246	47759	33426	42250	57434	57124	60536	40604	157633	478403	363803	324316	470460	26283	555632	592959	559958	770441	731015	665200	614874	374707	562370	442162	401611	466709	567340	651943	719739	895441	545146	537405
782.66467-14.463	374882	634855	1729073	1747441	1561376	961295	1835179	2286991	1911216	1648403	2073749	1609529	2006289	1633768	1307924	1666539	1464927	1286800	1518182	1076984	1442907	2627252	2429670	1379016	1838273	1084987	759038	1050481	1115836	1034281	759549	939418	1202296	1110077	1733616	1663032	1395091	433189	499776	1768414	572059	1139375	1965473	1377507	3190708	1684428	2589846	1328209
780.63574-14.522	7200996	7194312	5420856	8648640	7095420	6141241	6642520	8163538	7574388	7306389	5297705	9000911	10850122	9166738	5853473	5119220	4828087	7334983	4397629	5564302	6389958	5169394	7745142	6556406	3634066	3736702	2978135	3489530	5486997	4436114	6693776	9216534	6883222	4666344	7502774	9218558	7008190	5700051	6459765	6548390	6252706	4196910	9319040	8113411	6925484	8632127	15625350	5399816
810.7868-22.274	6881074	5274200	6107636	8898292	5189780	4628947	6792822	6778116	6857914	5519775	7748850	7341896	7309296	11933253	6224934	4816272	4177723	42098800	11764169	10552992	7307944	9530842	11339960	6453272	5017928	8115927	6155370	6425170	5423254	5570256	8721176	12011660	9635210	13673111	12827771	20870014	11360286	3483210	13839959	7414895	8922046	7864543	14333349	9067372	6909559	6778290	38088916	6397666
788.6203-12.432	3343180	3861774	3784614	4148258	3675852	3703208	4367854	4063301	3905828	3929512	4415960	4662698	5081783	4880445	4231423	3590628	3287054	3954602	3164601	3873196	5002004	3522897	4609800	4101306	2672112	3173826	2621433	2635013	3044514	3246970	3436982	4489780	3383703	3447751	4283148	3866062	2932709	2438207	3286629	3325305	2677874	3209770	4307190	3918732	3897569	4046151	5352612	3067628
806.75696-21.776	2876564	2421836	2603603	3911041	2303299	2057300	2917379	2945484	3689639	3077210	3729994	3346656	3192496	6092012	2950325	1895556	2135249	33105008	6788988	5254366	3102351	5088903	5634906	2918290	2305894	2757238	2379274	2357628	1813687	1956320	3919478	5680296	3803917	6497794	6169768	10971466	5022847	2014357	6800366	2800842	3763294	2931874	6979738	4139748	2210627	2578157	20109198	2760433
800.71045-11.813	165570	839508	173882	204045	172596	177212	198617	155642	182946	167395	135928	163097	190481	234460	252096	148863	143758	195762	138033	100729	183664	109887	605698	126733	99429	141693	652059	236495	157129	109215	207137	170104	133059	164921	147306	330965	119449	215891	149905	144574	236819	118852	151646	129480	138719	187446	183252	168278
824.76721-21.624	184107	228467	255978	313815	186962	264356	310788	455710	459714	235159	264104	276646	578169	733808	334615	200236	234669	1185463	402580	307398	326682	648663	380107	253205	222258	353793	243633	281968	189180	203921	568039	543342	272138	456253	448984	937803	350310	187821	618672	231762	328035	300308	426379	292843	265040	297001	1476500	245156
804.65454-13.235	411821	448533	407946	540757	349022	293694	874914	513978	402277	523611	367557	658881	687589	183012	328871	440550	426765	362166	327861	429636	680297	465336	386893	661229	227058	393028	271239	491217	366918	400172	665609	860014	436158	653587	741700	503312	468861	443617	487965	468881	506654	377229	590211	446182	730239	636799	892217	636842
820.77173-22.552	268052	338892	357054	474476	298199	300633	490912	296128	314829	353576	352512	302878	260054	227770	309698	283801	338439	3341135	320800	307277	291243	406588	434166	338891	345462	310008	305068	459665	322164	295424	379668	380919	393404	353814	262091	296327	357591	279386	260070	440219	230624	325644	394350	324872	297230	299298	867152	323850
812.70068-14.196	2719039	2548857	3974318	15799813	6900583	2391432	1613410	8037285	5186492	2389680	7761103	8874433	4060893	10203043	7562796	3021543	5036220	6574524	1933509	5877632	1779639	2844546	6581532	8989764	16957504	4149743	3164832	1290066	3428943	4106995	8906175	5323378	2722814	705327	3264130	4327429	11557609	2270466	5098012	6107828	6951358	1767587	4726814	3176629	1654887	9768043	24720558	2171845
808.67926-10.47	1002620	853080	934158	1133925	840401	655370	578423	1280354	967660	1019889	1424794	1028170	2201307	947543	910775	1087348	895197	1014110	1536453	381755	1009961	1180748	1499355	1115755	711124	763236	237795	354717	774219	1109896	1170669	1454307	1041478	987717	980761	1348845	1414995	444175	782888	1337592	401674	524692	1171342	670619	1366388	1764645	1730154	1003991
836.80652-21.377	303535	450590	373736	664412	507942	452942	327598	404592	759102	379996	592044	523034	606412	724422	722661	473130	305165	723144	340533	295416	112360	964789	1005278	329561	281643	443891	347040	457736	433237	264163	323364	360944	599028	336413	368593	513543	243735	307777	374481	495658	200448	339191	352187	688928	309331	335422	545032	358727
818.65967-8.062	348440	587177	230050	538128	376802	197804	377958	428745	573842	569524	480585	422189	467926	770474	530731	426360	322138	718935	625712	450518	685241	275127	487743	314879	83289	303872	80864	136300	235996	113031	340645	413987	156186	400476	448036	382272	195495	82730	520949	328677	75941	117364	491512	577612	790059	550951	276032	366925
814.63422-12.493	15098560	17166036	20354946	27857964	17276306	18834564	24951048	17533144	19370388	18364190	23511830	22324728	23955174	21264248	19091998	18715562	14236898	18933876	13603871	15446119	17467108	14912561	18834174	18105268	13279368	14452428	12991750	11471704	14549622	12829746	13049327	17913388	15496087	12006757	15949727	17665724	13107636	10905399	14371304	14760848	12941678	13863990	17362242	15176018	14578308	15180996	22331612	13518309
834.79443-23.176	1026196	1024944	1128261	3314466	830644	2227430	2673210	953575	1008416	2923637	2459454	895056	800006	1002256	921525	905462	2294393	500408	944676	938019	954931	2763782	2604803	2394489	2522117	1032807	2498240	1269550	1114470	2187035	1211342	1175715	2873711	1099723	1171243	1440672	2688199	1009078	993859	1216224	1102198	1296043	1745450	1038581	1093884	995495	527436	1058504
832.77655-22.552	311656	355606	427981	529880	314489	331487	459990	343035	348227	417699	353303	345254	310598	342124	331680	282098	420987	1370595	337868	338421	408252	479353	485667	390328	443394	376814	360407	393099	345376	329661	433416	414507	433754	390510	368605	404358	433465	316461	364399	440280	353152	378768	398839	377339	330333	331738	585471	313881
828.7464-14.527	534340	553367	552480	973413	576145	472410	599030	703870	616240	714711	604161	675940	950508	830444	604169	586172	503655	529759	502656	488475	630837	522519	576494	573504	312585	474524	253507	304800	421749	365647	680071	904664	529135	567828	599594	669350	499440	435013	554970	534628	398720	394619	855151	629161	637097	842715	1284307	611492
826.72888-19.272	376275	200833	208588	235604	328060	313660	170750	265806	201533	174015	200674	303144	199804	291066	185773	241929	175493	371436	245794	222799	320185	210801	284093	272672	151364	508787	354707	355234	350558	184450	450572	484563	371079	484696	590846	419346	362399	265421	381905	466051	328988	442651	437893	513003	512069	596093	489044	383479
824.67383-11.575	1060713	853735	961376	820274	1735604	945075	1120596	1037139	1078516	1576642	793486	975782	1182908	1389237	767357	938658	474936	893920	899861	661351	1460888	647270	1276054	836735	760596	831430	778866	799343	863387	769971	960398	1010453	1064680	1073844	978940	1358186	876667	936943	1167087	875141	719848	723073	914102	847377	768968	914633	1636694	892140
830.66846-12.862	907384	532382	1757545	2602598	1516021	1571932	1014948	2181422	1473377	2049394	1912592	1395793	3001563	2371973	1309484	1850020	1388684	1823911	1809022	509361	900812	824001	1930701	811635	1115061	981500	831949	283588	1120718	1341215	1440235	1479864	1024028	656714	1228984	1218101	1094308	363591	868685	888925	703705	918186	2169227	759539	863754	1325034	1569591	1011634
828.6543-7.69	835968	929273	778655	1434324	859534	379513	1050184	1477164	888061	772297	855444	998000	1094431	1386316	1207018	966571	880999	985613	778289	844359	841664	1100149	1080221	1417727	759179	1090353	1059425	1066264	752005	1065236	1867096	1530213	876861	894334	930871	1049794	918286	973541	809165	1142442	803378	939179	1118870	1093860	1075428	1161428	1398191	1136946
840.75842-12.793	1550523	1291668	1244189	1051863	1747356	1632792	1017657	1914587	1702769	1545369	1820041	1181982	2026023	2105457	1861847	1265755	1273903	1312412	1113530	1069595	1347261	1646443	1158108	1133208	0	757568	1351701	657512	1070340	1420967	1169096	1511718	1745277	1228530	1129722	1886204	1415595	1295941	869181	811864	1372063	1057244	1113000	1903984	1367052	1599455	2020780	2847742
836.71564-19.708	339801	369586	407066	442865	313075	394262	369203	382663	335767	271469	366147	427338	403791	402007	324813	339094	376718	470253	299065	364427	563916	357900	429145	424826	277168	292788	259439	277962	294868	246615	389445	469328	342613	278115	419398	394458	272569	283360	383320	382350	302699	300950	396338	364340	356377	408478	660555	319838
866.84546-23.295	459668	294062	1035649	1279512	219122	825711	888833	689293	760557	1252915	324600	310650	169531	724144	234628	639070	810955	538625	334320	359897	269045	990333	307688	1018995	585588	350132	1031399	956999	908179	386090	358784	1013121	522190	394615	321957	790439	1048660	830788	296232	1089137	418851	1084844	892214	459898	405633	678865	453112	280750
864.84033-23.102	395009	703830	442422	610828	549500	401819	491324	364820	404691	510716	792815	628100	803233	597400	600832	635800	763968	1939385	638690	398662	556767	917026	1451834	447026	543078	403880	445937	508707	413922	402804	840774	819964	553685	782222	673683	996855	507006	686729	724834	532120	444390	506379	798444	413485	424179	356967	1933454	719413
846.69836-8.988	866459	845602	489247	291634	649851	783222	1908531	1874699	471656	1041140	1680981	852143	2237858	876068	827227	313885	22811	1651512	1416380	1077342	1220622	304405	2135618	1579026	21181	173962	50707	630074	243374	563194	1244223	1138084	389624	1865920	491593	458081	541860	304456	1043728	319819	429841	647384	1495009	705320	1312912	1083572	1068055	1601140
842.66974-8.593	338225	327462	833929	165196	336519	410403	423067	327446	488455	378329	282584	754900	355214	265571	933219	701503	186458	604884	965939	689339	656128	701811	305162	398018	0	396275	888058	509881	635451	580079	663708	443292	400984	752159	752107	216711	770022	203867	455179	617717	1098126	484718	619391	241541	803416	878763	341776	343240
840.64972-8.555	1699940	1886674	1376417	1581142	752570	542055	3425068	2513158	1542805	1119863	2184726	3424470	2243738	1799818	1168582	1485720	1184268	2829407	1829163	2169237	1736920	2825444	1544186	2662328	671711	1968498	670314	958006	836603	1828503	1828606	1869300	1950599	2044098	1016990	2184008	2004779	372020	1704506	3417647	351525	1483476	1250093	1449569	2533923	1901058	2118840	1173170
838.63489-14.406	590118	2168128	1635847	2140569	2572183	1316833	1155379	693510	2326212	2138618	1319637	1948668	3400536	1941496	1133406	1397516	2008623	1212274	1227275	1091741	2020748	2212175	691891	1591525	1351050	1003292	809012	638492	1188393	1280273	503074	3766858	1377155	1161281	1625374	2275765	592213	1377721	1949655	469492	618168	987058	2274578	1655489	1188438	1808821	1310928	1301584
860.80975-23.177	1833861	1984578	2150841	2965942	609733	1759154	2250621	1677641	1390557	2616391	1920342	743447	554870	725428	680489	1581920	2044956	747138	1698887	741993	759181	2161532	2097100	910454	2378017	1727670	2124296	2310512	858267	1825287	2180460	966619	1156090	870250	2025902	1281327	2267046	791737	1841632	2367031	879499	1055204	1571068	874991	1960870	1674695	1684434	1756352
858.77319-22.681	1402184	3500500	3509812	4905784	2333948	1398810	1962454	2986682	2783515	2157764	2915968	1604196	1184037	1332698	1323061	1464322	1733637	3690428	1410556	1422510	2685214	3669524	3623403	1747256	1890495	1517380	1670336	2017917	1520321	1775002	4409497	1470757	1026703	1630396	3214566	2788196	3371676	1128142	1347131	2003710	1529696	1594661	3323529	1404910	1501040	1400772	4154054	1424220
854.74939-16.006	956784	718174	1122394	1379720	1010648	750923	1042551	1057905	1150911	1292830	1239290	1042453	2195675	1246455	1158653	1108178	1262253	789546	1088716	558829	476932	837987	1211120	748671	615374	665490	445385	818239	805754	728635	1160455	1464513	851560	969622	1127548	1191930	1023858	495615	893802	1023534	658311	704752	1421572	987179	1214812	1669353	2342578	1092225
878.84106-23.424	1226691	1172619	808934	1123549	883093	640893	847314	608370	627336	2102737	728466	340257	218387	857352	523676	358571	719398	483727	350090	388278	368964	830920	417880	837849	958392	396381	828751	837111	704230	700060	840635	468545	1795577	401178	409993	371372	822989	1324174	673721	1634749	462083	885744	426021	703123	1271512	592706	522850	385436
856.68237-14.751	13120200	12896964	10048642	15937873	14736149	10021132	4722472	11540803	16949438	12957792	3568027	21245228	18913406	14988126	7831080	11906735	10386519	11734040	14140508	9403712	20601536	3407403	7993040	11681226	6547218	11248086	5945827	4695064	11822789	8669155	7869186	13332836	14061176	13161935	14277589	14843882	14383157	11324013	10850793	7345272	11972103	10740499	15709513	16490936	15573476	15689572	16599767	12642305
872.78912-22.939	1215120	781677	878105	2244956	534192	660492	866611	725527	640718	1756833	1260827	683559	442311	651380	602039	917386	871664	857512	644034	1171613	876507	861828	928574	1527819	1099718	759858	1388988	1510043	727344	759651	852933	844093	1738060	1210835	782934	687048	962704	2101632	715441	994514	835561	1466044	819390	782677	1304158	709335	1061392	734664
862.72601-22.333	4885737	4325081	5189287	7282267	4136122	3586379	5267686	4281972	6047342	5763258	5499017	6272848	6043044	7605470	4659988	2704104	6597820	21107292	6964513	6401551	9927993	6551378	8628598	5905864	6031534	6899034	3422072	3424452	4185395	4209615	6927996	8550417	6537188	9799641	9855804	12300257	8497137	3302902	7911748	5716838	6728598	5269133	8623008	5394014	3596260	5119294	20920080	4209118
892.85107-23.357	408330	1246062	722318	1948813	947143	1262985	1534022	1090302	1246730	885674	1413048	419395	426223	573632	1036229	608445	368954	1523174	1089639	582833	1073008	1751476	1271653	720211	1671901	568408	788649	1612517	1347615	720317	709340	670151	595894	1286897	1299512	1296094	1516539	1411464	1234572	1688914	667342	759658	647798	1288064	1372194	1046855	1624732	730936
874.7406-5.712	641656	638788	426284	632952	294094	668461	448818	440735	488731	684526	376713	630489	459948	632482	344150	458770	251895	334638	277205	483900	606394	364494	622421	587436	176945	203174	257675	294828	223472	418422	329410	401724	277055	286088	231915	260171	276763	568659	325364	294347	183344	255663	360959	385358	253862	293120	189844	159541
872.71436-5.647	731017	746977	749190	720203	731598	566254	604079	606830	783142	756530	561590	747821	573077	619828	574886	585463	692843	350789	726582	606262	628267	651997	645395	857326	0	417602	508372	523307	569351	507661	791098	739408	751528	572891	614482	487958	473207	568631	844215	651019	640752	311504	245810	644103	783320	505739	797899	743589
866.66522-14.811	1931727	1860823	1698230	1553128	1783851	1579392	1400511	2393762	1837074	1812247	1857019	2067944	2265482	1642586	1922342	1544942	1762976	1641145	1859016	1560925	1744410	1580407	1867405	1554033	0	1660729	2521416	2048354	1862616	2235754	1642443	2715993	3128186	2779630	3302190	3210573	3054815	2410793	2044797	2476332	2457565	2377255	2325862	3174062	2985057	3141465	3164434	3546368
864.64954-9.433	676764	270036	677887	956011	641880	158038	621251	839461	588720	500706	857302	766235	823330	304869	677589	807578	604179	695363	944262	601830	652726	648156	776912	755183	387613	578220	359507	354498	628786	588466	692258	731955	622957	639708	811684	702620	824507	78189	571034	571082	402908	491768	881297	570496	394968	895256	1315627	632412
890.84326-23.175	330991	1710351	414832	546567	291582	324752	419904	360782	265710	513294	396766	310711	309067	369214	316959	347626	409648	2154202	324458	348660	310916	463467	448509	428889	495024	348067	412127	465291	354895	369155	470016	1918108	477032	403407	412081	1554329	451249	312227	346618	457964	390981	433058	412674	349339	394805	337661	1950262	389697
888.8338-22.922	220445	322952	257258	362013	197381	255450	335650	225018	244045	388708	236007	157387	175209	230515	212210	205376	212919	1310464	224496	227633	167821	287872	382957	267314	368896	247782	315470	351779	230325	222909	359288	272209	286379	260949	255019	422498	282562	240572	240378	339755	247532	326751	268200	257775	299664	214422	817771	286276
884.80316-14.463	22973	126399	185116	230701	156903	144180	177519	160792	189624	155777	179459	185911	212025	147440	183003	178714	165538	156205	148326	130579	128791	132995	170981	167713	110758	130376	83436	103766	120260	144726	161070	173560	148064	118716	148789	164522	154729	48986	146449	136772	41519	123440	127957	111181	114785	130604	171623	148141
878.81268-19.755	425428	234775	335631	514610	197758	416492	261382	487524	571036	410483	582648	673403	332178	572237	487603	334905	794647	770634	598930	377778	555166	289801	990735	762159	256575	912722	244101	294002	299265	386160	478566	390499	377597	473767	499332	446341	255999	254753	230452	323165	329096	76104	273386	249475	153196	549026	1437266	107510
876.65271-13.479	147162	130861	89414	105376	178404	135943	127167	237618	203877	165195	85755	124187	115773	239455	123824	98788	97636	222298	94761	160800	653817	106751	87705	186669	132531	115948	167877	75040	113208	105148	102754	132154	100009	116782	141696	122815	95600	176436	107929	104890	296177	96130	115400	123501	127607	139285	188433	112648
886.73688-11.587	259176	147270	132680	214570	43639	48252	285051	303479	113431	54514	249564	194611	306347	306472	69463	273392	134358	187119	45918	269134	156246	157761	373721	211720	31557	205285	124859	187493	184458	150959	130331	254433	299393	439254	284633	323746	124342	220823	197256	323240	122433	171652	366407	288130	461759	571477	578327	289950
884.71436-18.842	4933568	2832928	4968502	8125070	6070644	5380465	5295864	4846250	8170792	8551584	7424728	7158265	12175876	6450071	6347466	5126509	3162980	5233628	5957455	2533012	4483984	2825885	6791630	2912770	2182577	3921056	2253958	2740939	5882401	2057861	4640267	5548686	4279696	4358928	6721619	5318186	5278796	847328	3622544	3267640	2263867	3167072	6388270	2842847	3675481	5397612	9841530	3840779
900.70825-14.564	372901	316160	473835	667013	401350	468550	723028	465215	588662	513206	592739	678507	1083352	443257	506817	555552	370959	602036	630537	350706	609194	340826	633806	447414	221713	487500	246544	273065	504375	258542	442941	527043	508375	517309	683993	583278	627496	118307	378347	456226	203467	418073	646010	433182	584718	659936	1317718	521609
896.67822-13.659	914386	484646	764632	1389071	972619	791966	1084256	1018053	1427217	1328540	1076955	1119031	2524681	1046022	1219471	1027873	709925	979923	1334962	395717	680088	533447	1165628	519082	389826	562480	238269	224146	1064209	174660	803536	1095213	780415	744576	993208	935517	1197835	195905	827958	927933	324265	647550	1386115	699258	974470	1255022	2444077	871530
892.68713-10.707	528599	543466	313741	391108	244562	230104	1863847	901127	736329	286448	799610	888357	925797	404023	382245	555074	416480	654994	764520	518401	904264	842233	957714	633219	246827	672731	309378	554353	616536	774033	619957	788180	629989	967785	926043	515544	882239	302588	570870	962757	225232	519156	575845	456315	694589	1047673	892160	754094
916.86249-23.209	256137	285144	319166	428097	195651	226407	298273	1281842	197366	385309	291419	232020	173931	244666	222051	228128	303127	1618399	238120	246543	256280	312199	321874	323351	360582	270840	288029	333876	253251	287220	302016	284158	356052	274403	292165	246723	327021	230195	252936	337774	276350	335636	299361	266897	273971	248920	662820	262902
914.84692-21.988	418518	1390602	1807614	2566856	1637344	1624546	2230989	1858807	2004750	1154945	1716021	1869629	2328618	1626348	1744898	1977919	2586296	1350052	2209038	1082991	3840076	1953454	3733986	1277395	2579628	2407361	1197086	801855	2050097	1666159	1569410	1947876	1894706	1112408	1855944	2100826	4155973	803403	1567876	1782285	1857989	1261930	2120339	1610211	1245366	1447049	2250330	1348967
912.83618-22.172	582190	584414	502265	725665	511466	407615	934734	685846	837791	613187	615510	747984	962154	656280	732275	549287	1088327	1182323	830226	418493	3669310	987205	1265823	938442	929072	1197966	500518	598026	680958	562368	764257	824084	686819	784051	1111346	794201	1317941	386931	713528	655778	722073	661685	797443	488622	517468	696796	1478140	738240
910.82874-22.129	397789	1847061	496115	327992	402091	308254	539400	2079435	392830	1073806	567828	1168732	1114865	1726806	547348	1149408	633538	335336	383093	447994	386514	1024761	425213	1930449	901243	715247	1682628	1986041	412800	423347	2077478	458062	427502	1746216	1811344	542892	810431	1022618	158342	580800	782799	600564	756805	384343	1145752	612492	528610	1721929
908.80475-21.627	1001220	1379291	1082150	1216836	852532	797554	1117825	1358340	983735	1008776	1112577	1175723	1266365	1392390	1357124	1328905	1398667	937134	959473	1075048	1367182	1106136	1333426	1282137	1509400	1269032	1176616	1044786	1003526	833130	1567539	1272027	1029347	1454094	1736443	1234476	1700612	719718	972844	1202909	1293308	1147192	1541925	957268	1399673	1264840	1823256	1463964
936.92908-23.417	1330179	1266704	615483	1328064	1003659	677301	622494	1357704	1406670	1983818	752517	1225532	596740	1947020	623118	523923	658084	2684934	936826	1113507	2437941	1724916	1984780	673631	1593335	1449982	542831	704166	844658	1334051	946934	1224959	1940481	1265794	1350420	2299331	2183636	787018	2000787	717297	1345801	1264508	1391833	1564885	1047817	1365296	6647695	761069
934.90723-22.49	622218	845576	1022059	975768	759651	638213	805304	840274	886190	811421	994242	945760	916218	973915	961495	398427	949734	2190292	629443	950122	1007771	1214188	1237964	584390	456706	979241	759650	779082	648748	417714	1042273	970751	785546	1165375	1098634	1391906	879333	381708	837739	856321	784699	766891	1134945	874628	758297	800076	2082207	548545
932.92401-22.285	650911	573203	730324	1008173	763585	429682	805607	836032	913911	682191	844590	956490	964845	1128656	792257	764796	1026643	2347643	1080921	873214	738292	998099	1737890	884105	746013	1111546	654448	778701	685977	752197	1112251	914192	866759	1079386	1237756	1247540	958050	508274	900100	792812	891289	680282	947749	691906	798336	748349	1364008	821285
920.77991-22.935	2736187	2714513	1518857	4527895	984468	1154578	1461320	1391504	2952133	1813952	1458181	2294896	1732422	1619893	1927493	1817835	3109367	5742433	1691747	1617368	2665094	3236644	2239769	3047114	3342103	1442371	2850133	1494445	2285730	1782850	1600778	2022215	1899712	2956904	3279939	1494547	3450047	992816	1853694	1673117	3026863	3032767	1165331	1522671	1311747	2270882	6224495	2447200
948.92249-22.683	840060	1104594	693713	1552547	331350	312548	1154481	808248	816967	855288	466157	599374	674559	1089549	1616568	1146146	996358	1193399	494181	1013575	340775	535696	1819847	591734	362327	1265187	802165	831075	320208	1027403	773170	968685	920120	1275590	831383	1420089	872684	268308	351929	367916	826413	724756	1193471	1048614	913116	890222	2361857	1522852
930.79205-12.631	223597	384525	343928	334015	214029	367045	432101	478610	262793	234360	339880	434872	618027	422546	424826	357422	58328	429812	360166	486057	259530	279162	504041	307966	138398	440720	198103	205300	342177	173739	360518	393603	295783	383999	679629	312659	345512	162726	338188	416544	276157	202965	624432	285389	316967	560959	768334	310013
928.64673-17.302	271188	240448	247965	295672	189458	167136	225542	188941	269439	146871	292775	291664	329708	165651	242557	352511	248291	339850	216666	208702	508781	225677	311356	226215	119142	331826	125770	120786	129583	184102	236630	368685	162952	214645	270613	473278	160350	88570	318594	265941	161928	154351	408555	166560	297381	185681	974787	223724
922.73401-13.574	253635	266494	358908	464080	358120	232649	317548	347271	415486	335977	407796	431147	626089	416330	505702	552195	414627	376917	412670	265740	537842	257732	359816	301656	171657	305350	159979	63874	336358	236007	578634	464759	319687	252309	401293	668800	537626	125841	347639	398968	202022	287467	567846	291304	385471	483078	781379	291247
940.87628-23.557	511576	495496	566484	871458	338222	418039	546970	447654	425154	790447	463295	399082	236671	399483	354253	373714	559908	549919	450604	428227	2375406	512153	516749	605852	708899	473500	572941	610623	487508	515231	574731	609032	714557	464476	512888	477951	635063	785119	479890	678741	586775	562948	553664	537519	552994	423742	641901	484535
938.85559-23.347	2378476	736744	744170	1960460	1660066	537221	696814	633644	2333208	3740451	1035765	548525	561435	1973598	729734	821727	1250538	3271722	2383822	2150704	2424128	2762584	755713	2844656	1625024	1106460	1271718	2950694	1100551	669128	2600581	2829426	1554049	2255456	2634067	2267647	2951365	550041	2446062	3179501	2684304	1252154	2422769	1246688	1162532	975360	3921970	1132367
936.8418-10.136	61624	7209	52874	34251	79825	56960	57343	52899	37108	80114	59484	44062	73530	48359	85255	70640	82342	59432	58901	34797	55542	51779	49010	47922	36018	32496	11296	59496	50646	50500	31250	51824	67772	34234	59626	58772	56702	43644	71209	33036	15744	58193	43089	23433	69418	66009	49320	50884
934.8255-5.712	4405795	4442329	5771249	7093128	2493692	6375114	5318329	5480824	5253491	6096912	4531680	6196380	4330922	5237934	4371434	3568165	2653100	3763436	3005982	4728180	4223741	4442308	7481945	4529511	1712852	2046602	2562618	2997610	2001021	4702141	3397870	3406080	2211530	2853062	1889579	2248508	2249233	5528450	2602530	1810313	1508448	1291337	3494582	3522685	1997494	3119406	3007141	2839633
962.95343-22.186	252831	394220	335529	566725	383821	413719	353115	366468	349938	302130	546976	299442	434222	530352	696719	409249	465855	517842	233012	190482	113755	533227	503090	302838	325991	388405	404817	387749	481232	349680	501683	389053	311131	303934	412679	616769	322180	299045	308278	410363	250129	306741	372503	461050	488497	507723	505291	496494
944.80762-22.796	2530451	670928	693642	1707777	496710	529301	1281888	2436123	2727737	1788106	654437	1334661	1077922	1104692	1113556	844409	1716444	2315230	1099037	946436	4811092	705252	3333210	1245732	3525215	2031431	1598580	1013366	2340138	1066339	1671845	2780366	1821130	1023839	2518262	1908578	2533257	941480	1914324	3136980	2732822	1513657	1749518	2340327	1577673	1532542	4174260	1618278
942.802-20.32	143529	119696	122476	138868	98903	99803	125309	111956	116051	84069	107484	202523	125576	130685	132397	139887	156626	130698	115475	114057	1159473	116393	181683	211547	106451	142297	63814	67145	99400	111764	142959	135684	116136	96457	112366	167081	107410	87410	115113	127341	121899	99038	134302	104389	105364	121061	272024	97955
940.77844-11.754	1362207	779063	853444	787503	684009	1124989	1127796	1864998	1465700	948384	1522251	1205053	1624043	1300762	1510412	953509	265186	1828797	2005710	869459	1632013	551284	2381920	1113637	310249	1404583	512913	764306	775190	581626	2012254	1479996	925940	2347671	1493095	1548340	1757064	764251	1788720	2075234	680640	1500708	2034974	1892544	2267856	2213111	2667564	2292042
938.76233-11.151	668670	602946	533910	499786	671397	793376	596685	807565	661947	910086	1008590	773043	902448	1185671	929141	811218	798162	399090	739051	719854	546747	872135	559656	884455	0	410314	718448	593984	663765	611189	397360	572481	515069	566741	648800	895090	679047	565889	339025	564271	302840	465607	534090	551897	391168	627862	827112	831558
960.93207-22.508	617815	867673	1019890	994995	475988	705116	526011	750610	567013	498464	829095	831574	741129	950050	717252	682835	1014653	1251756	657950	745702	1155113	892666	1070390	778131	389903	822673	415053	593937	520292	724529	881433	668111	618414	838249	922949	840511	490650	313033	367898	677190	583774	534540	749283	621106	457892	702030	1174548	629077
958.94702-8.149	23920	14519	19591	35321	37334	24417	30117	42396	28306	24856	26137	33045	40153	30617	39756	34381	55019	27401	28114	18537	19763	22380	19399	28659	29594	24445	1783	1029	17815	3191	31064	47469	11274	15479	14743	25927	30557	5788	16173	28511	15346	16625	30837	28540	27098	25610	61776	20815
956.9361-22.702	1680729	951141	1567355	2256362	1316266	1140918	1549807	1766560	1356602	1268283	1679286	1998087	2402417	2115182	2544286	1839717	2879919	2442748	1559722	1016863	14482392	1384118	3367091	1491988	2503437	2141616	493477	345380	2077590	1322491	2026024	1654712	1607852	859418	2141806	2603830	4291554	256248	1940350	1650198	1695912	1835876	2488079	1187288	1631207	1940436	4492194	1831388
952.85199-22.371	18792140	16414539	41337024	15897039	14401858	15951740	9003022	11442370	50524008	9897097	23327938	19561240	20457308	22798438	39773276	20721974	35982460	23897990	12635122	11339565	15779065	10380216	9475425	15492698	0	46267980	21479192	43592520	48221548	12640927	12911240	47167328	14614009	10893561	43051760	48078512	20464962	37011028	17180588	11564651	28209010	36546256	23226990	32644632	11607413	34903564	22973928	19546794
950.83569-23.361	721643	2907253	3086816	4668830	1902674	888967	1205601	2587744	2579344	4148220	1144166	1001133	409353	713943	841134	1963685	1222647	1404388	793547	792489	705668	1344258	1618991	1333835	3728070	1187995	3149991	3501264	2566374	685132	808689	952854	991009	839752	959410	1109607	998417	881359	847583	3538448	810574	1299178	919002	778810	1164550	1046359	2030245	2676214
976.96539-22.877	521924	675293	735876	705604	589460	523113	398180	563743	672241	514831	593281	816038	1334915	778000	745553	534115	698565	1283316	711990	637255	866031	792995	1075256	412377	532782	817312	582555	658425	424406	596525	679508	778772	615680	799380	747825	845221	630584	232282	617870	643243	551809	578164	853062	663944	636753	672359	1814573	810925
958.82416-13.171	261783	19646	101782	60177	68878	56963	93140	76163	78625	46489	66314	49904	62885	46534	221719	17983	26381	72389	113728	19664	147440	59610	119014	53973	199979	457004	118716	211798	208938	241776	589916	888803	557022	573798	673325	807488	325646	190536	339468	278126	267109	299954	682753	426178	291822	490728	1543234	469174
954.80994-19.642	152645	317039	355754	481196	129639	103081	169184	127283	161148	145268	318490	404706	194082	146506	321667	664966	249426	459265	173688	373051	1089696	262811	379348	379427	177125	223857	94202	73273	155245	243820	175558	250768	187218	156762	177829	896019	143003	53943	189270	166616	420305	127837	429180	130856	190369	192839	1974432	138111
952.77789-19.607	29219	463025	407517	468159	392137	369239	322694	504290	478209	273792	527825	644111	360406	485676	456894	639333	364713	599923	309375	585027	1709339	348068	622350	589807	211795	209256	226929	143482	333244	443586	412349	538410	394265	366082	382793	724676	290057	250640	372579	379960	408385	192146	549506	374875	471417	435499	1307811	348010
950.76147-17.888	46514	74341	212043	244294	39319	31952	73799	110771	150109	82510	150517	159228	160633	168230	213390	277110	41418	175912	145768	150386	108198	117543	100570	139715	43228	98849	47714	139013	154330	197910	82377	155988	137363	58472	187247	244294	139796	74079	82627	202600	68117	127215	163370	142113	189037	173847	737030	106106
948.75018-17.312	254769	279242	266466	270364	142773	110306	246759	198012	233702	148333	381026	265984	228493	165820	265027	358943	273726	275588	222610	227503	850287	436638	233055	254134	181225	358078	167604	98762	219493	249013	248165	600143	164026	141538	179252	449868	223943	95396	328448	267681	237822	194625	453785	230158	184677	397123	898144	237733
974.94153-22.585	513151	633139	1025326	771917	727028	731720	325418	540863	568051	273295	935845	950858	832284	611863	1141008	830479	1428816	835525	778473	931797	1346433	1052752	796440	783288	474097	422440	577365	260217	548813	733299	948008	354343	1019557	624856	775132	849501	561066	350261	276323	825846	556898	466029	734063	832028	357200	950289	1606730	859776
972.91809-24.164	203644	563285	712087	474456	128367	466040	338974	206387	567943	1394554	585033	536973	98646	172982	144325	202812	210546	284478	280003	755947	367400	338431	193256	692021	170244	450498	232571	398591	821384	430285	921801	311962	470762	283303	223902	395773	294076	305371	186801	739839	604200	432069	210395	243086	315370	232952	884248	223136
970.91504-22.808	567586	505924	548443	749533	465488	445071	712070	645175	748564	620175	550598	851987	840689	556851	719237	493613	932929	1068121	612186	429090	3271772	665709	1184235	590144	839439	897717	476045	303875	623696	494484	598183	668021	567614	552651	680266	893960	1175593	261122	630708	656051	603518	696880	833709	455299	555768	685468	1533916	609718
966.86755-21.858	1003209	4621622	1454293	1651289	3045028	1224274	1244540	3985026	3205881	2735256	1364162	1507770	4773520	4903695	1271934	2077937	1657806	903046	1070701	1398122	10176605	1220298	5009186	1910080	4069686	1701919	4447811	5642978	3976857	1535875	5122845	4325123	1339271	1635117	2044143	1688383	3951052	3202402	3236361	3964802	4462271	1541870	2358845	1650919	5955670	1836059	3796754	2418925
962.8418-10.156	171121	192995	137046	125668	146177	166263	178467	144144	157214	113583	178011	146763	177601	118116	132213	130833	97313	214797	154102	127176	229208	139351	302962	148779	133259	229361	169305	283318	152619	244569	238215	200726	170372	212722	228760	212349	218343	229106	169384	270082	189771	234759	189582	198349	171930	153258	120048	204713
960.83295-22.502	990357	1670172	1179056	1633986	1050212	709924	873669	887718	769627	885237	1298817	1415183	798583	1481735	743573	781110	1420788	1645726	647382	738606	1586784	992913	960330	1365705	748903	770989	709525	698812	697417	948212	971609	998891	617132	903466	1114089	1197849	897082	525936	761206	675605	665637	603312	937924	819731	732152	709752	1411634	856836
992.98486-23.11	134338	96741	257972	192323	63423	39829	149406	133874	130653	157679	151313	452832	699270	177806	328490	77498	137190	322369	165732	145344	156963	303380	419061	162985	156620	159905	76841	103644	122060	145308	178243	164444	155334	199238	206219	241007	170701	41287	133215	145736	139881	276044	189926	127020	91771	161268	376666	89637
990.97882-23.101	271451	359077	350025	384034	226462	196699	345340	120212	352809	218865	176107	774226	1560332	380769	516632	240017	219565	382311	462812	257201	145613	417651	523941	311642	196901	106516	195719	242833	250472	288006	80130	122050	217359	210061	139011	496929	294261	68723	108527	154225	90067	425628	359658	100133	295436	94906	824448	93362
966.79694-20.617	58770	103186	90018	63677	67797	64859	115356	88696	64854	73573	60104	78559	97007	81196	78238	93543	46594	78306	144709	84838	128732	83383	95529	71069	76581	101690	64893	91142	68566	70275	118428	79187	89659	110750	133400	83840	100364	34762	44817	78211	74728	84354	106503	88254	131904	106024	147724	114018
964.77618-8.483	248559	248347	406152	522604	249109	393776	486575	633953	451334	379308	483133	727761	1311470	615316	479711	443791	122134	341998	1316801	264671	382140	211997	622667	758388	94454	110786	57932	199664	267353	305546	740314	354955	378964	834560	650931	538350	594911	187195	644344	232938	222310	328442	743279	503244	660365	1090439	1023776	521157
988.95618-22.862	144715	85863	165602	184334	237493	141725	151643	129273	272933	148779	263819	253823	919594	166064	294502	128383	146288	485268	232869	186532	143674	343579	161621	159042	196443	138251	124412	235963	196060	143830	172914	216405	154011	168655	190978	218737	133169	193232	197263	150170	130504	161292	189258	143862	136604	144781	638601	177243
986.94714-22.562	868670	535621	1054077	718948	889763	717098	318843	623224	1004447	685304	635166	817252	886698	1092722	837935	950029	954707	939818	948396	507848	559440	977306	698682	943892	0	922238	1024781	653704	720459	582658	729092	1216897	612974	725409	854296	1194788	801948	902416	444148	555756	656036	821576	824644	955099	597437	1129529	827300	1109974
984.94983-22.924	994316	953693	821411	863471	1001573	468524	824236	478839	1251272	1083814	1170892	1423266	1311915	625261	1482312	1199828	1496000	891886	1003468	414299	5582532	902880	1787456	1183607	1629670	1332398	355324	330666	1361763	559688	1134528	1039345	749427	535128	1460150	1076340	2227212	270039	1318962	1191902	1124768	1234819	1590314	933506	1156134	1099535	2481153	1035859
982.91217-23.729	1479683	1680898	749614	2613064	1039705	554025	747180	625354	568151	2465097	621398	1293772	173766	1254366	438571	484869	439151	768683	1441565	589957	610030	1741888	432556	1894352	1001340	1411361	1819238	873329	1474322	698155	735436	1689651	2155594	616768	1557543	578091	1850441	702691	612441	955954	721092	754071	1577186	680247	1676884	1282022	832376	643571
980.89514-21.811	499049	1025094	644726	839393	812083	496958	587310	1114436	695947	769906	636748	678400	703998	705188	671221	720507	674352	493659	521372	569631	2384422	860557	1109784	751956	1068482	695015	609580	536218	517732	615000	1512983	1094922	546816	728112	1179657	744823	704505	780072	927422	1017321	1150738	588751	1247514	651134	1046895	683688	1196252	1085685
1004.992-23.163	408307	460022	573273	591389	333779	317302	441590	336927	461539	412172	460367	800864	1509951	535159	448468	363187	519425	824421	447603	421363	753705	604059	647668	474854	298898	280647	282983	475109	370012	425750	419937	493740	591243	525244	579293	850286	459495	218947	417402	353549	358581	352900	510145	415956	343832	310138	1513839	455848
978.79785-22.362	1184572	746330	1325969	2082086	1405808	999471	1117677	1238306	1175636	1549936	1170609	1350631	1881083	1335480	2522628	1562349	4128812	1210471	1287988	789853	1339698	1045453	1668840	1024682	2792505	1850321	1043051	813410	1884286	953602	1631499	1436704	1525648	955360	1696638	2051552	3765583	532670	1701267	1652012	1374778	1703423	2030603	1074719	1239984	1664566	3694581	1200890
976.77374-22.127	304536	318678	587608	599927	569962	482190	198141	307926	522972	668237	516364	723200	801191	469467	820174	441371	864030	350990	339663	318867	194760	312434	224790	464538	560020	734391	450044	317758	380725	408807	327132	468689	290013	257741	586424	506300	736884	160364	329193	710628	442711	622802	667207	391041	263256	697090	644288	290975
1002.98187-22.891	346988	158942	398434	501089	152860	294573	345510	167671	277177	220819	159361	403021	1282276	395336	516290	351347	451167	877925	231003	370523	654344	156491	342416	370333	193706	454641	286370	233856	307379	251414	427598	218139	385963	301117	440541	535578	428322	87489	365880	314585	306932	252602	491839	300485	383495	354046	964654	381653
998.93262-22.491	434433	108419	249681	634560	136275	326837	224488	122972	405758	245974	352496	173610	309247	228188	664961	205947	771477	548790	506927	132278	1954949	568068	887924	163601	273321	366614	120075	66769	526176	522241	233619	519414	462183	111708	202844	609895	872014	90104	433814	170030	163854	502159	264310	488544	140136	169278	215880	174549
996.93317-24.198	259817	272210	257115	409208	184805	200708	273305	247849	240522	403403	228327	199415	114195	193560	352896	173562	264809	261457	212008	227990	1438583	292265	257250	285692	361221	209843	274742	321499	242812	616756	677746	723422	360428	232314	245323	555097	297892	1244163	235867	330504	281413	286873	624305	261608	271055	521222	840977	235132
994.90753-22.104	1118395	1160194	1308381	2524963	2356480	809105	1485901	1369990	1148081	2700044	1473007	1577534	1596381	2537518	2846869	2426188	2314220	870608	1407296	1231434	1178887	962951	1931030	2268237	2725758	1532259	2518113	2652643	1461328	1991040	5179120	1363485	1306612	2487598	2656681	1372300	2185183	488627	1173606	3443431	2227676	1667428	1930527	1063136	2125136	1630435	1989700	2318452
992.8877-23.293	328726	385701	388494	535538	251655	271193	396421	332113	314232	454499	343374	754316	264740	325986	282232	257522	382856	805031	353232	334920	558398	398476	499539	410631	467212	346675	357991	412396	310643	341928	400917	410112	441509	692997	424223	846793	435548	258078	352859	447201	367842	367588	403564	353077	341588	285830	1417354	344342
1021.01312-23.335	114728	121669	334923	150854	157852	93311	128048	100614	288112	128287	194471	485157	960429	133440	379573	105593	199111	263127	128698	120161	126414	235046	273536	320795	135162	122015	94762	121911	99890	112853	137499	144216	128370	149848	159932	186895	127182	76128	115496	120420	104750	134591	149893	103747	109796	107116	313122	117753
1019.00311-23.358	470728	281555	375398	423675	205344	251549	277366	335730	498990	393987	230356	739191	1896491	406882	403733	220206	197432	384153	286701	227518	437462	334808	471869	481923	279266	198432	189881	310954	222585	257630	233099	141963	476550	351314	395096	412370	286227	164490	230102	169375	195438	349857	339275	197964	443012	194263	955622	199729
1000.87195-22.73	250440	218095	643257	1004826	471733	374404	220540	478224	491149	227697	212513	182755	278273	602606	427767	282669	488156	444328	374470	482688	1316870	542300	758160	537093	279115	374029	184465	188653	502342	397195	367858	517545	236674	207502	354164	613413	681119	143305	444665	230710	471078	291960	434062	305581	209786	236360	1084606	353930
1016.9964-23.013	270430	122006	136771	498546	111807	115785	137627	194409	368843	116606	168542	478952	1152295	253924	143371	117700	99864	921951	268270	219052	353049	188949	170048	269792	119859	158468	103326	123950	131127	114618	153077	392183	225069	260145	397595	201170	138555	115897	137452	126033	108749	116971	159783	115766	126042	124723	835301	140397
1006.90686-22.58	348771	294612	469603	500968	373456	304286	475749	319620	374648	443539	409079	542724	752677	400955	516274	384086	722108	828449	418334	293180	471058	427997	548032	405826	516225	617289	354028	157520	430832	374636	493798	474675	467655	561331	471965	498383	609136	247006	475906	425993	309679	526930	488468	461245	560041	512016	913882	384081
1004.88489-23.636	1042095	154734	160296	955552	389740	1561259	1930128	326049	245863	504480	322556	237273	73482	250065	792851	252654	636675	540912	333031	273968	282145	400428	443606	167480	789851	345479	389691	444900	326654	544106	380274	438289	498560	300158	424981	423019	448668	265630	285368	2339912	412645	398291	384906	155461	369817	296359	584320	341720
1033.01892-23.359	203639	344870	199244	151254	206418	184672	254712	163321	276419	221113	268327	381194	651737	220754	289969	270379	211591	707009	240765	232297	430140	341787	427254	326632	268434	201828	151041	170143	160639	316630	351387	260307	234618	271503	391056	409993	326971	197125	232932	233349	199418	209923	344743	186550	251308	239869	981783	184177
1012.87402-23.219	765709	1170367	870128	683304	583708	523778	892491	799854	572588	1004778	913977	590930	530152	532352	533141	551545	956013	1229744	610353	575616	1185434	770963	956524	1077046	1268337	765448	775500	853099	717328	830665	941171	862384	1034476	792554	710153	737443	1337899	535669	1016076	948257	934428	638616	989150	819090	794472	608475	1299734	430627
1008.85229-21.665	26233	85244	104823	59633	55375	64222	55778	60145	62180	58977	84508	99521	62417	82722	62354	65677	61993	92259	36187	29567	614051	95944	183826	33937	33689	122799	66395	80238	46202	64307	73448	53884	65294	63955	86871	59241	45937	64321	44148	72498	39338	57188	92396	71446	86724	87612	88903	85861
1006.82324-13.237	510733	454189	691945	747950	654153	617555	954611	825123	731189	738085	709866	901450	993206	894510	721360	707583	291936	795091	617332	714054	1243310	430875	813786	744703	250894	837141	462888	591610	681028	380062	523615	936875	867264	999234	1009569	962075	800590	657163	797723	466572	571079	684285	962538	463562	1090048	1181561	1320641	717344
1002.79187-12.86	277585	100630	64775	92124	42624	40562	119709	88446	78318	53862	53425	77662	55736	70516	215630	59406	85717	74648	56927	72708	129368	85122	114247	59804	159314	439419	145731	207348	152397	202467	537905	714768	367642	533647	405736	690860	236222	104891	235306	260760	143704	194736	599016	422636	296728	321973	1149792	359214
1022.9516-23.001	120914	145190	165017	127001	106008	111177	103594	87612	115195	591435	89075	173708	197266	124486	132966	110252	132589	135761	108433	107073	120182	154736	152878	215367	230217	124858	142463	105246	124061	123632	142877	133918	67758	128671	109335	125242	147179	136442	126408	99047	126884	148509	172042	114219	87899	150722	134257	91096
1018.91083-23.364	611259	497529	772564	1062203	312185	442128	830446	250744	614222	343775	517305	975006	1402352	607198	539325	644131	350078	851558	654623	472655	429575	721169	844280	830687	719764	525014	266818	313783	233115	309706	363702	596180	336619	462351	505640	511169	684180	193174	590734	305623	278805	293428	624440	543555	265032	281879	1178472	258545
1043.10266-22.851	91802	143036	192792	249017	218538	268501	230484	183891	189354	173532	190284	244482	246103	64285	223941	162866	183932	145087	209257	181579	180234	211233	214504	185899	75516	248983	168622	175121	198916	234807	233559	172695	189247	259221	164019	235253	178963	233825	208206	236510	162584	171919	191099	185732	178079	204163	205849	167401
1039.03235-22.505	383766	361949	551775	560077	655562	441169	453654	526489	183346	470479	231807	505135	620375	847215	638117	730780	462111	577924	567734	179723	440921	222718	278052	542560	0	484738	539042	469359	659269	472347	480923	715117	444411	438440	446901	480414	505063	454928	355659	410550	488807	227245	442160	468528	411317	464226	633252	332837
1036.96216-22.417	411506	1141092	574304	349760	274504	246521	520312	1123000	260973	600182	556680	422067	915055	1210775	495315	962813	679945	281815	630968	583194	110146	462455	365353	813220	1014022	653673	1055077	1158083	597910	394841	1407919	503519	451885	913555	1074017	347762	995407	558730	402428	993305	741153	841352	869030	252909	935955	346804	279800	904693
1030.91235-22.61	211315	751412	864717	792485	474088	518602	528734	280456	343610	459867	429085	544616	165104	443167	289450	403792	371488	226465	293511	299258	458377	358569	449975	321355	110229	146065	135494	101457	85942	207758	245121	125341	105254	85178	109046	61741	80693	171736	87746	139309	79359	197491	99613	141289	58566	159571	113081	85321
1028.81018-17.333	166331	176993	226831	223566	110367	124143	220073	118165	143694	108022	151387	221562	250662	243795	121184	132539	97835	164900	150608	176686	191695	98237	255755	118233	65948	166539	65970	73552	93754	62854	143343	231509	126322	175768	207302	122315	162522	86530	98688	94552	99106	96661	146784	125757	198829	137271	242969	124010
1057.09766-22.679	109801	343018	137958	71219	179434	123967	246810	231171	280507	62979	250536	171788	160931	148278	124808	217071	133409	312173	122629	120146	151266	250762	341700	161171	60809	112546	54314	132746	73768	67906	297378	273561	90578	124388	140485	249120	203917	64101	213161	70131	102650	190897	138458	253285	222562	287280	209161	279389
1051.00598-10.407	66085	174659	73469	33536	61911	69396	38746	45028	84930	51735	29020	38973	31572	61808	147697	40727	49531	73169	28831	33360	52310	50577	212276	39813	38775	42336	76044	171175	42307	2084	121138	47047	28386	54070	24132	106430	26813	95366	72111	23397	45848	41590	53983	54888	74898	69105	57231	72116
1071.11743-5.649	44628	37637	54715	49585	39864	16838	42919	29614	16746	40061	43615	60492	14807	32530	66110	29916	32786	54426	30960	39595	45209	33584	51385	59458	31927	35881	35778	51111	13559	16800	59455	13742	56203	18226	55083	44743	32266	19228	20759	36653	33454	13731	16414	16015	40286	37509	52380	59302
1069.01855-22.62	178722	247265	156473	309838	235770	222314	146723	168255	276324	156193	316594	285491	357632	149361	251693	161842	190650	422865	170779	152698	128405	169201	331239	109371	66300	257592	125315	67906	160189	116938	159855	136155	141489	208760	223449	368139	77299	135415	197692	64574	71782	59788	200051	122647	127588	92209	458575	122448
1064.98022-22.652	198234	406765	304923	366458	327651	324260	112616	473699	112615	308738	333472	433768	614038	417683	424067	402891	367186	295459	288446	276541	79121	284529	160661	321325	335439	545801	393809	470086	194217	398146	447312	128584	205236	499952	595671	258433	578601	102840	302295	371159	369611	345853	337466	223048	395883	262418	176829	368117
1060.979-22.779	456012	459431	506799	485292	438668	367171	555477	533763	548343	325496	475084	994287	1112528	499949	464877	403004	323986	990377	470000	428730	758356	501009	704875	514809	271754	539964	345367	403062	363911	383535	462469	565964	425629	626696	572056	611303	490624	345906	386078	387788	382472	443848	580979	499430	532825	551849	1055455	384010
1089.08618-23.356	73373	83180	115059	118707	62425	64110	90940	71128	132988	69106	65970	284417	487975	93675	139476	101027	89508	125165	72610	48956	105988	121135	103041	105085	67651	48304	55600	33330	66818	93084	57877	84993	75929	74498	93227	42756	34772	29205	31927	49062	27093	88390	86971	25868	67384	75766	134979	61710
1056.84705-13.274	27193	134627	77300	87378	67963	103185	161584	78930	70595	62200	62366	92143	98680	35334	128735	74159	65176	135478	56865	120251	79048	130388	104723	95704	72989	156397	87691	140430	58720	87831	182148	127860	97109	79798	91378	83477	86113	119131	73971	171089	106467	64576	145742	98620	189443	137448	116018	92501
1054.8208-16.453	1468385	1741923	1524814	2048422	1812923	1610084	2084170	1908082	1758486	1555190	1641399	2267971	2433416	2306143	1454799	1989093	1203665	1963768	1869536	1305008	1919220	1096570	784084	1422796	1144232	1985422	1560742	1293964	2039121	1129218	1802531	2360700	2164914	2360202	3187656	1831528	2247719	926574	1564103	1724360	1721494	1867473	2372895	1838387	2038194	2387409	3074791	1788109
1085.15479-23.122	34128	59132	118087	83188	41149	38987	102536	108894	43203	31296	68832	58999	44437	123260	138368	126486	37856	75070	56909	53584	59819	58238	38099	35511	43618	37841	64192	62795	60136	114689	74149	68107	57899	35325	130463	143218	121988	110217	37966	24911	122628	98886	103653	98987	38031	39125	132953	75874
1081.05664-22.503	44302	194818	146769	184391	155211	206289	176048	20788	101515	45518	101971	182768	253711	275482	247973	101084	24107	224823	117144	86876	62489	135010	353686	40290	47132	162786	127010	165121	149544	121777	116465	24238	177041	83047	32189	65095	23233	89651	48548	61446	37564	73764	19327	301100	61326	62970	216964	44521
1082.9635-22.432	101433	38727	70132	199929	95881	74850	116973	98774	100871	82526	64758	52393	125284	86427	62664	18313	68181	79065	92507	99641	42514	72289	82460	54400	96654	232629	161615	291005	166171	65063	338155	273031	246452	355209	285943	226500	208346	223688	203678	250195	145277	197498	251426	260495	261126	369806	256260	313780
1095.11877-22.562	46842	66716	135723	137553	120107	150136	70388	90198	163918	74959	159096	155177	89380	71778	217914	65807	148192	85619	71579	111191	48622	89720	192255	111287	57294	27785	50327	33282	83831	97769	79290	71158	50056	67143	84134	149706	88752	26503	35369	42369	45193	106327	101532	74660	49940	153402	193723	130971
1117.11694-22.539	37205	194454	181759	183661	100558	58549	132916	144787	470146	76257	227820	105284	137226	138628	58479	135421	18417	57328	45096	188113	56302	188899	61070	51976	132916	58149	42742	37762	98321	89593	225833	18163	194450	51490	27884	54640	146378	69383	56610	153973	178286	53330	71668	58289	51891	246727	28173	21376
1109.09937-22.475	56461	75533	183129	120072	236992	253529	40901	62348	302507	147567	245029	260082	277033	89773	294681	101473	130098	50525	114602	170352	37290	162913	234337	155637	45947	60935	63846	166988	213417	188360	229181	166191	46527	37095	64926	83660	88436	163491	81251	146710	60182	161200	128880	97626	177365	187974	50660	147265
1103.02124-10.549	20189	48392	14138	19084	25126	14842	9776	11026	15734	11875	6018	6595	12953	8369	29199	8883	19865	18479	6639	9605	24521	18226	39586	14572	10700	13240	21657	46520	11357	0	24349	10993	11293	15830	5881	26242	6984	23833	7043	8572	9795	7529	12442	5737	12330	24371	470	15921
1129.13464-22.396	43604	117355	205011	165854	214235	255248	222741	121152	168360	115916	94012	240027	199286	215194	272798	232895	211822	161986	246435	218762	119946	236665	134356	204977	308032	219526	143462	311909	240141	255709	200445	249064	211077	213970	218398	197034	189542	263853	216274	274027	118884	77860	97223	266223	203570	232038	200200	234868
1114.99377-22.084	218492	801466	815303	1143007	722687	848443	1156727	560505	825546	939578	743592	723752	458031	639652	712771	560344	745382	706733	617102	675516	632022	1020882	898377	754975	898271	793407	737766	921115	788016	626070	1000101	804682	822143	668078	701869	788640	810419	658717	618159	928280	712401	785169	735149	898902	613249	847554	671023	707627
1110.88904-5.605	24218	39879	40590	38861	25414	54881	40427	26639	37871	50382	43097	29712	42539	16248	36548	23843	21479	24119	20106	38937	30644	37774	32724	12222	26893	1911	3729	5589	9974	7512	3246	20922	13680	15539	14460	12580	12854	23393	17391	3298	7279	14820	20155	8631	25210	12088	15587	8113
1147.07202-22.126	347370	540426	534925	666362	544192	494879	504102	397804	586446	547333	497306	439042	380236	423325	414622	323598	496988	403182	372310	450540	201737	532300	554222	484423	528212	479750	430135	543647	443279	446248	639832	441839	455883	389871	481738	435785	548466	494800	421876	597560	437781	501534	474475	595479	460694	488666	378757	443820
1145.06152-10.907	38045	155496	42222	44648	33897	38277	14110	8018	58823	43358	14938	26527	52978	60004	118602	30027	38463	81156	16473	14846	16238	32192	137104	55704	27169	6188	56691	101309	42895	22	73633	6680	23356	44128	7208	58263	23568	33540	52441	226	10682	2974	26708	44130	59219	38067	30125	41897
1153.0249-22.871	283635	484868	251586	189720	236859	171500	138712	462312	220398	297274	296171	210299	322330	397475	238594	384749	303359	201175	153304	201995	351697	201171	221770	402009	414321	293405	404742	464258	161869	185038	523274	201696	121603	482084	497573	310492	363747	216161	134769	358932	421510	280041	361165	207597	365583	276810	299041	500050
1142.95093-22.078	11922896	13454537	13543992	13776051	19886166	12984946	13610101	16097719	9754736	12262040	15527278	13037523	10491048	7201477	10501523	10757838	9588566	14218006	10748866	11376862	11978019	7169782	14285206	14689636	0	17820586	13389880	14208168	16550406	14300475	12810944	15170198	13542718	14872569	10841094	12786104	14239707	14949759	12696099	13030557	17704346	14261788	15302980	13416209	14914014	11397374	13390529	11755384
1140.95325-21.926	445944	416382	419286	488736	327725	349361	490023	272161	354745	352780	421917	354838	237750	304575	298841	302204	389666	257777	215986	290835	508596	374167	650822	370535	292415	700971	287677	439468	329806	280450	379847	372843	352192	355577	358494	308944	324921	286007	297318	396194	287691	320415	317698	405333	433512	383543	408783	356635
1138.91687-21.524	2136113	273435	203843	191332	130801	128850	193019	227236	264565	135084	241405	356227	321302	249670	177339	283246	171304	272234	216415	234723	6794734	233619	585886	315850	146244	377288	181658	148017	185323	183992	152362	245743	229225	158101	274581	313086	150717	94736	209872	198583	348780	170699	205372	176941	227446	191231	328534	167412
1171.18994-22.552	67636	115136	189301	215400	170464	100483	49666	47999	255994	230649	280633	231341	238530	92905	118312	249240	248487	157845	99869	277627	91503	177795	240043	225196	162105	198947	254218	98454	102611	149399	69220	227088	149245	57358	126613	247875	185861	201357	185697	65051	177597	99852	79043	238789	48160	213641	198974	52905
1134.89478-20.311	199202	243010	240340	285838	231418	200376	318546	275479	260126	272433	279905	320966	407588	293743	203770	229316	163394	244741	245838	198860	294871	204302	295599	233667	139088	289498	149085	117895	195568	127397	222951	280976	200459	243783	297583	233001	212458	159865	188320	204386	144878	195774	284810	247131	252812	287479	368212	203275
1159.07422-22.1	1255764	1196140	1535646	1749892	1178773	1271748	1543664	906436	1505898	1391619	1322982	942414	693919	965343	933659	869347	1180039	937402	1106958	1181827	584265	1338330	1260122	1118217	1340602	1204229	1126995	1385661	1198169	1082054	1624779	1279759	1207415	869603	1006520	1116410	1147633	1117283	1166700	1477687	1240160	1297783	1013774	1300566	1001163	1190778	911008	998855
1167.05994-24.064	190612	283870	237688	185952	149673	125469	110234	230491	176661	207547	176125	180094	149016	240253	150469	191638	203434	132127	112451	152900	153860	106011	164148	271529	345577	150708	221901	322239	126766	170785	259636	207523	140723	228108	232314	181886	233723	168560	100983	197048	223370	158079	192225	148285	188347	160767	190815	254002
1165.05249-24.039	806027	1067687	2105580	842904	781988	648788	346162	681490	2348352	373057	925041	1044347	981670	1107219	1534519	751352	1636135	1005422	783797	533971	799289	308115	575596	847008	0	1582508	1015140	1823166	2166342	377479	686626	1996576	521649	381529	1899497	2138481	768082	1507691	661381	381332	1281663	1381023	1115264	1496734	427063	1421369	795808	1012459
1183.08264-11.382	24298	58205	21695	30274	26583	18277	25287	20388	21336	20494	16015	17841	24416	38712	117613	12321	27139	37734	13457	16316	32490	18210	77692	18405	15582	18807	37773	98343	25926	1981	51297	33400	15425	30154	10283	44465	12201	37664	22122	17272	10105	13934	24239	17838	18296	22711	6510	34381
1181.05896-23.111	706801	608440	1109032	432052	379295	464841	260993	301197	1088082	282867	668699	531926	546241	623236	1068645	484348	888532	626468	385546	290558	437973	246672	292949	532211	0	982682	523803	1015133	1147898	279092	327780	1157586	386329	283163	1070588	1136814	551418	854807	539819	257972	705498	1004798	556817	803631	359368	858352	602886	487156
1164.93286-21.532	128551	143399	148295	169180	65746	65734	112033	57510	185960	39928	81249	102253	112717	87279	75838	159458	99077	60725	43779	65663	4329999	63213	626808	83346	44239	272775	59965	62287	45273	11939	77622	72642	19046	129827	71722	57244	44931	36629	33115	46889	32225	23516	54177	16695	24863	67002	220461	21420
1162.91992-21.236	124807	132037	79202	90488	90815	88110	113624	103223	138343	87255	171620	145169	156066	116189	77692	180073	76499	116864	88134	103440	6234154	166656	684937	126295	124096	122090	57827	49197	75906	139039	97628	122250	93244	81554	99591	132821	74209	80952	89360	86985	360526	63163	201576	93777	95594	99157	304560	81623
1160.90991-20.374	289812	352550	342350	435375	319903	333096	392458	373484	417564	363629	383697	490501	626364	442142	259137	367491	262850	356252	345194	298843	356340	272816	330679	311844	162809	257243	153579	185857	261386	158473	313565	358126	259488	264802	290481	259670	286238	214304	252217	230757	207572	252415	338873	311175	309110	373728	563234	308689
1193.104-22.522	51041	40743	95660	121854	45105	44837	43678	69747	380045	80936	95288	41525	16484	25699	46596	58024	189070	72997	14954	37418	33677	92429	90185	66671	69005	59574	77755	37771	41795	83469	298432	86953	28775	46328	42329	114598	102854	73742	39659	88944	35327	49129	31663	112580	50469	47461	37808	17182
1187.06165-22.119	587629	516151	401264	924387	822371	617424	556809	310541	630181	752358	389179	559653	501120	352355	517854	310790	612183	565004	299240	376571	187978	489316	943411	565585	417298	613815	490362	400489	608876	323680	854287	623558	345065	253399	665928	622073	649658	593199	525240	840488	514451	664824	598048	514929	581776	637668	507599	357347
1185.05042-22.294	432754	386004	53906	159568	69011	421156	431205	268101	462255	71736	410057	345970	282915	347572	163342	301062	56059	332530	239652	335814	107844	445274	398505	119759	45788	555798	341489	134504	110947	41363	135266	350156	340856	398436	356167	268420	305487	365096	323394	132148	82867	403846	334465	285063	398860	371687	104797	304718
1217.33704-21.641	1799112	1706663	2046355	4333782	4017764	2219602	2066831	2446379	3350822	1393863	2155059	2393947	2247087	3054474	4590432	1730544	1826209	3806930	2824712	1793482	2451487	5332776	1517774	4389204	0	3854058	2817472	2598719	2654037	3055612	2397278	1403920	2016160	2596149	1963332	4477700	2101027	5894114	1849696	11146598	5542446	4885565	10977343	2660362	2118688	1846411	4123402	3677871
1195.08875-24.413	162159	290198	177640	160110	127591	98944	126425	289266	122624	218444	164780	143314	138533	227891	137691	202070	159726	143564	101211	128809	91760	123167	160595	215261	292784	152468	231420	285172	104608	110996	267269	130488	73736	238977	258342	135012	216797	87555	67106	205313	215826	176005	180265	126413	199045	157953	178000	242688
1193.08386-24.455	1272372	1272661	2695213	937021	754191	1023183	516240	690856	3056526	560243	1433189	1197050	1154550	1353846	2549268	1148429	2086474	1170991	821953	592703	940471	464136	543995	894044	0	2087712	1171761	2345419	2631634	593969	712978	2552586	599692	581015	2405990	2321359	915405	1532203	1054491	613052	1555403	2152807	1229614	1539764	679388	1795196	1231754	1152669
1207.24316-8.485	155492	141613	132743	84422	59075	73228	176918	69749	69034	64497	137667	152182	68007	185160	475245	147995	155646	144853	114426	107053	68832	157107	362521	151853	160701	174739	219817	372571	46315	32574	337471	79095	146256	212261	142868	122930	154820	75164	36015	152534	28314	137943	67693	72588	155159	217134	164882	234467
1192.97461-21.765	41858	42452	259825	264167	28809	43874	190289	35038	87599	167871	33780	68445	41368	39050	35690	50330	45642	20910	14453	23047	576872	19337	72824	41159	14327	77519	57254	31114	16491	45442	27115	11126	8438	23629	17256	34167	14562	13927	15705	11653	11318	19191	19389	12106	26353	15584	17786	25725
1190.97803-21.982	137553	227213	68314	278859	182749	194775	208626	172877	188570	152359	241615	201444	207960	49243	182057	140531	221109	76701	119721	204979	122018	198179	307667	156193	86410	80754	158855	195010	85865	128141	185770	162008	167667	184875	189231	105839	65627	165297	161827	178921	122178	227276	147864	203291	80011	64620	90498	171120
1188.93372-20.324	79097	128179	83786	112895	78930	52041	225628	114869	133551	69281	112571	148564	171229	101105	117249	101481	70590	128626	113204	92710	157297	152939	173599	114833	81748	141891	86939	117475	130931	101758	141240	129855	158196	182126	186480	143416	160037	103124	109450	162285	78335	119107	157501	135534	158599	171331	152920	117774
1186.93335-21.115	375210	344337	345666	507006	419807	390955	399113	432001	512798	597110	388719	479462	727297	464719	470713	422368	335907	350701	416384	257957	177611	286554	523231	317946	231555	309766	187856	178450	342355	154050	350765	380004	321658	268993	336321	331183	334604	280188	360101	367195	200041	259954	427462	316505	363554	446636	655368	349914
1219.1272-23.018	27856	17315	23043	23240	42536	30639	29188	52516	18446	49961	43766	40856	36676	31715	37333	12375	32680	39175	67160	22219	18570	24277	27968	58186	0	12298	45436	26362	38156	29795	47213	53633	33319	9406	32877	49658	33763	57003	51315	12299	17686	25954	26593	7493	36277	34463	15890	26880
1221.13147-23.018	25188	22893	10551	31184	24107	12232	10777	15472	27139	12336	12402	31034	24610	28730	26457	29260	23771	33170	17946	24301	11294	29879	37810	14856	23301	32547	13547	22399	23807	15533	39819	25951	21818	22930	14230	30608	29746	26974	37249	23644	15699	25158	9991	28246	8711	32563	26469	31559
1239.1366-23.605	206861	287509	139848	108672	129026	98366	91774	267903	113738	173833	174478	176214	169072	279256	148760	234218	160065	147511	76977	157817	89380	97905	135256	231147	256408	167892	262692	295993	82207	99981	335910	142219	78649	281980	327929	164119	223563	152950	99997	163588	257081	162211	207852	123418	207193	195377	168416	273046
1237.12073-23.604	419343	785289	269976	225135	310279	151651	212487	675206	263824	443604	311694	340087	412263	634573	337951	560339	362552	334617	172431	275130	171484	183014	321458	559315	669151	346548	642392	757454	163008	221964	765518	299552	163927	733906	770327	369975	577052	364781	175885	474077	698473	399906	544474	188125	537500	400277	364561	723825
1247.16052-23.514	9542	14847	8840	10411	8415	10915	27090	25096	57793	8246	21948	8997	8786	10055	9045	13533	10571	14491	5105	28779	48703	26732	32957	12860	8063	10879	6882	11327	13510	7559	20820	12734	9399	9168	14257	29543	12483	37941	8505	8186	7407	11263	6006	19275	26167	11256	27719	10202
1265.21387-9.765	18664	3927	17854	5139	1469	9741	37657	8767	16788	44236	36472	39781	74107	23677	4335	3047	6988	5843	20202	7996	13137	12047	6746	9020	5492	6181	2155	170	441	128	856	42408	1161	21393	31456	29558	18588	9838	4879	560	22018	8717	78667	13789	36395	70202	37614	22735
1265.15295-23.863	99440	164027	66932	69634	69814	48033	62304	150987	73701	97309	84623	84554	79558	131496	72209	107479	91397	67854	47123	71837	71124	55064	92049	110193	148047	91524	126263	164888	49034	52588	150815	63884	46157	160326	146753	99362	115965	88618	60940	97758	145549	88514	112462	58055	118284	84193	74874	145858
1261.13989-24.409	627262	1275264	468358	380210	490739	255807	337525	1664390	284064	699090	611086	599939	726260	1241999	619056	1058048	590360	406378	294129	480683	218322	269537	443720	984390	1329875	618088	1234287	1487419	259965	363478	1440996	375540	206579	1206545	1468952	563167	970012	419318	245700	816796	1071967	615440	914607	336672	959032	671306	599487	1322088
1244.99451-21.386	689097	678198	697036	712738	704232	497730	759896	637143	537132	530822	665995	675654	774378	519958	905792	651548	714548	960835	840882	586759	408568	609078	917378	683300	819172	1091894	1082356	1370621	834785	963375	1590836	1064449	934793	1259229	1106938	1092748	874680	1143963	896998	1594338	1077601	1198969	1023531	914750	943112	1054614	951767	1041096
1275.26343-8.515	12910	20501	16539	26253	26079	25775	14024	30574	22581	13674	12840	24716	13765	26790	9210	15118	16946	22055	17761	9065	23508	16302	16384	14916	18935	11843	6934	1804	13834	21195	15163	26712	9541	13434	8701	10551	18260	24281	17080	12333	18394	4955	20575	29972	4917	15202	14224	9541
1279.17078-23.34	110177	195052	90926	89593	93520	71169	63900	205157	64135	108717	102335	103098	121298	177130	99934	157039	126087	143026	59806	100401	86551	61561	115592	157675	172899	106263	167396	205175	67944	73199	225919	77764	50238	186802	214735	116933	136235	100066	64910	129490	157728	103760	128484	74595	148123	132376	116090	193972
1291.31787-9.011	86417	181538	49799	95530	48021	83164	67837	26452	82548	57150	51414	50810	60243	98310	180667	68204	59520	124932	38603	22997	72092	79039	172228	93915	63881	77674	93989	177119	25986	6479	115648	59989	56856	71963	21568	120368	37038	91445	66218	62872	21536	28023	37544	45283	74822	69929	16837	88648
1313.32849-8.593	34213	79315	51054	32855	36893	45082	34801	19577	41448	37138	37186	31814	28827	41225	62349	37903	32359	54294	21921	21455	31560	31288	85453	32486	28794	33934	50222	73050	35743	2635	38244	55447	25015	39780	28708	46558	23528	49789	50563	19900	36674	27889	31934	39518	31421	39988	19652	39465
1273.0271-21.698	861723	937484	880016	826932	883000	671378	995821	861939	680353	735559	903340	769133	835455	672504	1198159	812726	887865	1251602	1044473	704719	464110	774084	1091001	822366	1061574	1317072	1341328	1783685	1143015	1172826	2063908	1365827	1109142	1559138	1332783	1467079	1162137	1426962	1216400	2133792	1410562	1489587	1201040	1111034	1238734	1239411	1205790	1388962
1307.36768-11.225	35136	35648	62258	922	16187	31678	18722	30384	33683	47432	46442	46514	32325	23191	42291	37469	8861	6401	17259	38291	34457	4978	38936	32166	6292	215	3453	11319	5227	0	11156	621	11455	11676	0	618	13479	15535	5735	5668	3427	2338	3554	9017	2342	3245	3541	2367
1305.33423-23.974	16706	12308	12784	13588	3708	7608	10285	5207	4434	1961	11141	4500	10941	11313	14057	3132	319414	6199	1853	10504	5044	6555	15478	6468	6052	2327	5828	12246	8188	4314	14433	7985	6847	6607	6433	9223	4576	5386	5738	10845	8058	2010	6789	5590	6136	5254	10132	3511
1303.31494-23.976	53517	25485	27075	44766	26906	24800	25387	16481	28348	16601	34781	31311	30202	29333	47817	31406	1957535	32406	20735	13873	18510	33451	42963	23526	17594	21870	16490	13378	30517	15727	22628	20878	10337	18039	20904	25504	17145	16035	17253	15346	10404	20615	15099	9955	8866	19477	26177	24272
1309.23547-21.714	20875	115048	145745	85104	38478	96338	58556	40941	39310	503617	40815	88698	61425	95734	126887	45687	42938	64220	44629	91739	22683	100407	68779	106497	156393	43194	114134	62732	79585	121213	100390	73880	57210	65649	38570	28069	86358	112948	89695	114768	21202	74852	68530	71322	34801	76888	63779	88411
1307.21155-23.597	61764	100744	34077	54661	48621	30728	42392	90559	50055	49090	58221	70717	63154	83218	58459	86210	74137	65121	25565	48663	23109	49494	42683	70182	78219	73057	83848	108625	34425	36830	105880	54580	34596	93339	87529	65655	75734	49560	34107	77748	83218	58170	56948	40372	74422	68159	67632	95848
1319.34326-23.974	18250	24914	7791	19646	21132	8673	8312	6118	7563	13562	2196	6646	17027	11700	11224	15236	13480	437918	8400	1620	2401	9732	4180	13881	0	3455	6261	8010	2949	9311	7555	21711	5870	3482	5851	3579	12477	3454	11234	11018	6229	4981	4165	4967	5031	5351	8592	11301
1311.23694-22.886	80035	63288	89058	60756	43676	83341	32718	73865	51821	149975	53060	82530	85469	87740	111698	88364	74309	85359	42615	62017	55279	102760	68982	67048	82983	34628	68789	85091	75950	58114	77469	67364	60112	82116	66791	71639	94354	62303	81219	94532	51714	112108	55964	56058	71841	115775	84877	76258
1351.36499-21.687	17027020	248337	323957	341284	234585	275112	339437	281336	211532	281965	371801	332737	298676	300927	340834	294722	328548	419081	320481	308757	223818	286241	378326	357865	299985	300032	423103	325656	287471	243894	324757	326088	300294	334659	335681	311600	319134	284463	293792	337098	305752	274074	348859	305640	354337	292111	439608	342310
1349.34753-9.667	135018	250344	117175	143595	121012	129460	87259	91214	123264	135218	86144	99260	92796	104615	330395	109025	92246	122361	43614	69575	105472	90512	252437	111026	107375	104294	149913	262179	114222	27580	185580	121548	91319	120372	74685	183352	62361	189921	141765	99378	130153	78121	77350	117849	111573	198545	96529	125689
1371.41699-21.872	77531	54797	122205	173760	59192	83412	72262	91334	36869	63757	90592	78743	114219	159663	67741	69997	129378	109024	63876	100047	133961	55649	125292	73277	125599	94997	89938	104505	101065	89354	39847	76480	99395	69532	163752	66883	174240	64535	300899	158188	172980	356229	95701	64768	72796	151854	115718	95294
1369.40405-20.82	870892	46330	69934	51034	46916	37628	45959	47475	38539	45967	64149	57092	53446	74115	46603	45053	67994	61861	51537	47680	33688	38197	86995	69016	60983	58203	58267	54271	45297	53667	65728	45859	56144	50075	58136	69470	61166	61302	49449	44465	71484	75898	69838	64182	50424	58575	60013	65627
1351.26306-23.118	36735	60864	72570	69022	42985	64473	40618	39033	42349	152634	51333	61545	86043	60530	55745	39951	42939	53329	36172	46064	52787	53205	63261	41033	83827	45364	77649	48028	63430	48208	69020	52955	48256	57586	53288	48199	65831	64468	67080	50462	43559	43665	64101	39035	49614	81697	69461	44524
1349.25012-22.071	33441	100667	157635	156398	72034	40867	134438	68944	55096	316461	82376	93376	100268	39921	134341	88079	53756	25098	104321	99645	45135	120328	86216	100831	348403	104124	138245	120264	120280	144841	136209	86504	112644	95376	95833	62402	92386	50496	101742	136326	33349	156255	116736	31472	116417	105631	66775	68069
1367.40735-20.817	237094	47971	72343	56511	52150	50203	54977	56268	36071	49355	65307	65722	69904	94371	48276	50165	62918	64003	63461	45197	37344	38225	84766	72916	72896	54097	62098	60412	67232	51704	81323	56101	63695	52203	62813	80281	67501	67278	56104	51134	77179	83358	74243	66914	61723	66226	60520	74850
1365.41187-21.872	821730	713692	1773180	1812396	746637	836316	974509	1135972	508404	693242	1044441	931125	1180589	1763484	687050	757424	1620840	1174276	764276	1083233	1788941	589439	1514522	770557	1522434	1221768	1010446	1060761	1152799	1029366	486512	789709	1026845	727701	1718852	854230	2254063	695318	3892313	1863196	1840724	4118250	1062209	887085	803534	1745383	1509400	1183078
1361.37952-21.937	2823467	19076	38570	24727	26580	30093	30224	36298	20233	37812	34695	44003	25428	60694	34017	19787	35612	21359	43001	35809	4841	18272	35402	50833	32049	25484	38136	27180	32072	21890	37487	28811	22365	29504	26574	32298	23887	35170	20720	22050	41769	41290	50278	43220	31086	30973	29803	36054
1357.31836-18.458	53344	21449	15751	23668	25286	16338	18518	20947	18488	19102	16528	24022	22383	24551	15390	22364	26007	28689	21976	15149	15788	15643	23435	18554	26785	14313	16396	18043	20236	15437	32880	18086	18485	20056	24811	29379	20859	24068	11713	10029	16483	15217	22608	15583	19958	23384	19688	20345
1355.32263-18.456	64781	25270	27126	22210	27550	18650	20587	23942	21786	21726	15983	26664	34070	32357	23936	24471	29261	32831	32484	19574	18550	16329	31972	25874	29437	17082	16528	19147	20232	19816	42153	17548	23233	20674	31154	24650	23221	26709	20542	17832	18546	14625	26405	16770	27553	24758	32328	27873
434.18231-1.554	1722892	1857593	1979687	1726110	1611906	1996404	1711617	1756138	1576586	1717073	1827600	1520143	1385870	1749896	2127173	1934385	1922922	2111171	1755636	1631064	1511694	1544440	1812572	1704082	2002872	2072469	2282680	2334156	2003883	2370162	2400752	2254309	1997502	2215258	2046956	2170454	2187465	1913038	2031826	2322296	2186842	2161960	5668630	6882016	1972589	1915956	2156292	2182874
462.24042-1.435	13329754	12967535	15815107	14367207	13392772	8024030	7036217	12254544	5010901	15694298	9850606	4563004	8398303	11120041	11151931	9718158	15086149	7247953	7346074	5110012	4076539	5693794	11120901	4989060	16981464	9136377	9765161	14629594	13864388	12771359	12229914	12739282	12318698	9332522	8275726	6203370	10668925	13708621	14927745	12850120	13238949	11181501	7899414	14157379	6686937	7555154	7023790	8333254
476.27252-1.737	4679439	1694099	5553842	3203783	1989620	1831216	883942	4797858	4557826	1529901	2252616	4485554	2786952	2234663	6041828	5612062	4754877	4311312	3263769	2595015	1454103	2354558	4264810	4470420	5763224	3324821	4069825	991415	3691388	4979347	4319808	5364974	4039698	1943325	4880200	6075369	4633254	2877595	4288280	3830004	4161330	4964372	5808500	5455315	3449016	5065156	11939729	2370213
512.27478-7.509	75716	440747	641532	219637	132206	281907	309832	93923	115503	134047	120746	213931	166186	118230	290325	110958	192079	93192	94285	228322	43801	230806	132362	212483	109904	131908	155670	221250	64843	77768	125678	97862	84122	108562	105558	114373	112650	116484	84928	86016	51088	155918	142226	76071	154892	125885	83353	120728
510.27911-7.31	170006	246493	267850	287178	178990	162373	228063	167630	183178	141887	206767	213949	226085	155498	136642	174545	217691	226720	200614	126031	232429	258661	304956	181745	190726	229321	205363	193128	128272	196776	133518	212540	213162	182268	226287	172243	203426	140877	179435	156622	201893	148940	193554	225059	72672	151746	181138	146523
532.33594-6.397	727704	111370	331584	83642	218435	164003	233574	129690	200179	256289	191999	112915	74984	111460	247422	242905	230210	252984	226758	220854	70539	286665	193406	221826	0	221041	211163	575341	381839	320377	228915	270881	296094	291027	341459	685711	267922	285969	234712	275813	234712	250258	390041	325086	317942	384023	271790	315315
546.35077-8.247	538714	1098528	548524	854109	577198	560084	276421	440755	496454	561810	214575	194852	274512	999867	1254697	274679	637488	323205	212825	422342	555731	515729	972598	520909	681410	524937	720545	741725	587384	196790	1208272	572062	266068	265856	177392	730577	946219	1251951	1172149	903312	971693	781417	986786	749828	840834	1045982	1123756	1090141
538.31256-1.851	424507	407027	344222	341956	972520	471659	365050	394359	343845	819080	336531	951710	502815	359413	479747	299443	299658	436628	401574	358334	450979	356524	377630	864461	324146	417377	475097	520131	1340302	353752	503223	2988049	479504	1426062	1152868	2985570	1224730	1737178	1173771	469910	400421	615703	2270057	534848	568398	495554	430673	491009
536.29333-2.919	672036	673387	837150	982412	3463290	600984	846418	1394560	1485820	800474	758278	759844	3978578	1363356	1499927	1750552	1855606	698661	728171	564259	614236	742603	692765	729044	832038	525170	517910	545736	615685	2493945	641897	2787339	641124	544283	656972	1545158	670461	508630	763116	586781	3211818	485027	1501377	653038	567985	755092	3413376	626315
574.37042-6.948	1285449	1716139	1160495	1288792	1330312	1393518	1121938	625828	1071675	1111744	624026	1403454	1355108	1351972	2836684	1388060	1476161	1441268	975968	904846	1515264	1046682	1899177	1250894	1947616	1723992	1498523	2020593	1818986	2106689	3040647	1781210	1490696	1461563	1243483	2714595	1779012	1686371	1910265	1864888	1874278	1770196	1925001	1972778	1787771	2105171	2979400	2613655
566.34375-1.807	3284864	1062654	1026705	1555772	1438740	1183967	1149845	403706	1207780	1185362	1354914	870736	2484620	1001240	1069737	1174103	767506	1224101	1035518	997708	626142	1481613	1068313	1024471	1115491	1013447	972553	997442	1489229	3048336	1253928	1091172	1098262	1133241	1009544	3445441	1242747	2666756	1493412	1175626	925370	1119788	2033856	1109090	1202379	1549511	1043376	860899
564.30786-2.982	1074665	1167989	1177371	1075111	364612	1029272	1448199	1001487	1129562	1019570	1183370	1259726	1482676	1044112	512810	814956	305959	456130	792976	962778	601928	1002964	843876	552168	303485	485711	797232	377338	898279	777694	874159	1272022	379340	433438	434846	519186	333553	876163	987214	311843	323969	395628	526388	419554	511297	989077	1277308	349550
588.39514-6.025	837462	1240771	960969	979177	1616780	880812	1695636	1770788	1112462	1553564	650078	932814	1761450	920365	1017387	965774	940321	1089300	1623030	762805	863786	1405291	974148	776395	644257	777736	753014	810140	773882	655850	882715	879988	826369	898494	932781	992211	763980	772050	952493	1034697	764752	889139	972896	934026	997149	986098	1122150	1633554
586.38257-4.23	3252842	3784115	3426753	3608152	2966984	1362151	1399702	2578216	3043620	3252078	2897822	2874118	1727698	1579350	4415302	3212583	3517330	1728318	1196045	1144452	1320690	1333499	3747338	3182339	3131900	1360961	2636113	3532774	2691141	3269354	3659985	1573911	3085586	3258426	1391753	1624175	3518926	3299641	1783179	3287076	3601742	3198548	4066257	3979095	3374712	1791470	5392036	3937996
584.36426-1.424	1585576	1877325	955075	2376158	3883822	2321138	1565987	2915477	1496927	2629054	1442452	2344747	1105361	883739	1992047	1551290	1432748	1632440	2283032	1704934	920880	2085038	1538425	2207192	1516320	1780311	2151191	1464195	1898548	1936119	1794568	2463429	2131612	2151684	1628479	1532262	1657276	1860118	1737259	2102147	2380705	2509539	1063026	2408444	824718	1569484	980589	2623508
602.41583-3.784	555585	1236204	1749301	1786185	1138315	1031026	971110	617806	1065854	790723	1231865	1341070	1273233	1134227	1583501	951109	1883355	667762	473678	554000	595624	966562	1082270	1137338	1158526	723079	818060	772693	1015426	913711	686654	679396	600000	510775	641338	736910	607453	518193	1185625	607696	490105	540331	629646	947590	575833	723299	820928	754429
600.39545-6.331	710690	839005	892675	873657	680988	847828	901333	787477	704927	839192	925390	1140994	766880	468703	640293	625521	768134	787177	642000	1399755	607242	832651	800164	736618	761231	1362314	785724	964585	743695	865122	989383	822746	866168	579636	1341854	925368	815455	498426	926757	1028898	859499	1664271	911880	922985	955806	921134	831872	914658
598.38531-3.154	4336957	4247002	1878598	1964998	3483510	4185920	4643484	4249049	4409856	3785775	3795441	4520811	4406922	4439955	1739308	1592609	1576110	3849849	3914060	3251471	4440041	1486880	4434102	1564002	4000730	3981868	3988226	4733564	4177400	1497881	4037552	4621430	4091247	4033389	4971719	1694977	4539192	1576811	3893550	4379588	3996202	4391166	4490192	1808140	1855088	1145619	935777	4030712
592.33374-1.374	1186596	1905807	2262610	1687847	2107979	2224011	1848794	2043089	1720925	1740740	2359088	1826279	3117871	1160499	2116227	1552403	1589923	1960271	2471055	2304776	974350	1953827	2369613	1705644	1572396	1841851	1132886	1379370	1314194	1679333	2157253	2285360	1680331	2190494	2154646	1126967	2241297	1039883	1852925	1815649	1986326	1673457	1271981	1985245	896015	1383509	3192878	1140165
590.32672-3.615	1445400	1471833	904835	892648	1343601	883234	1499629	1437200	1393877	2206373	967666	951736	2831526	822708	1046809	2345211	813387	1618396	2242481	934284	2103457	873895	1683825	1603482	955919	2814545	1002319	3459560	2483565	954281	1794691	2760327	2655093	2758480	1641454	3022975	2434331	2798120	1678356	1651839	1729930	3672259	1758051	2650689	1692584	1772964	1119622	2936544
616.42609-6.82	1259118	1374999	1214977	1108233	711271	742712	2389374	1856719	763519	845112	1561741	1216496	954953	2605703	3493284	1836921	1268640	3440596	2215584	1615528	982195	2642858	3836858	2507897	1211484	2068644	1436663	1820006	778632	1672858	5073262	1357706	1343425	2572909	2055401	1860793	3044244	1265638	1311506	4225516	652360	1140240	1425978	1651529	2216508	4797078	2800941	3210287
630.44812-12.517	543444	168056	488188	182232	495764	446612	552168	135872	170698	167079	455300	158678	256735	107567	525360	590229	201410	472735	441974	133544	219744	469664	158406	152043	175014	463681	427613	374165	468066	471961	496507	540232	533011	384121	505102	589648	588334	431673	611367	534692	646096	524963	587990	483538	572879	501631	497788	548091
626.41595-6.328	610739	788397	751788	763080	630674	649167	854112	637456	684491	621605	669868	740092	798613	656664	845643	541642	606901	727294	597457	911061	553048	598560	780134	547784	621835	718884	732034	1075164	751034	1615588	855074	718758	686179	690376	817961	809550	666758	680617	751562	756057	643321	637737	649580	695898	604897	715443	712095	843906
624.3999-2.462	1804069	1158456	1969232	2359016	1247764	2012717	2175549	1482045	1244025	2278922	1964594	2294001	2615648	1861212	2104969	2154123	1931782	2007229	2846156	2366602	1135442	1673026	1850266	1868696	1871273	1639254	1837137	1792637	2183742	813076	1323188	2057928	2089685	2176112	1842361	2027391	720217	1076810	2007358	1931768	2058580	1614538	2338340	2117526	1957602	2106700	2110535	2187999
620.38977-2.915	1481611	680185	599930	782968	966153	801665	1002596	735988	1303198	840070	572553	600901	1273153	934391	656609	575237	1077034	614023	776402	832641	765976	589963	1109123	580220	930786	897056	617774	1311134	842591	605344	696937	760779	662026	691118	832341	989080	1176206	1233334	885109	1160840	736214	828324	1231792	619158	683840	664863	384346	697372
618.3479-4.667	1503751	692328	592737	1154086	739923	662831	1433910	829485	1816998	692456	1924549	1412253	4027688	1713174	1161681	878798	618152	1099093	1355423	584566	2640429	568031	1208852	681728	470384	692486	462321	608021	609544	676585	833300	820604	706147	839572	784038	1128380	949738	708877	1164855	809182	665416	787948	1667689	958334	932467	1688825	4118782	1093734
644.46124-8.427	213163	209866	165819	477636	322397	242265	221998	277420	268626	249675	271327	298123	371681	333988	302354	176802	469376	567877	273835	165276	832467	359813	246566	188226	321445	278653	223398	254374	250351	389626	506362	555480	433503	327997	304990	551565	381213	303406	504294	171045	401763	257694	356060	591866	645852	434394	731349	531943
654.44458-8.491	859332	1128956	1126915	955258	928544	853532	1060747	1161828	848743	964639	1165922	1035479	1033390	987090	1306402	1253002	1076097	1065631	933391	920861	1226406	1017833	1170484	1074903	1112263	1203424	1228713	1319276	911977	1075769	1414646	1059047	993820	1324735	1284283	1102925	1092666	1014479	1026910	1186960	1108152	1123966	1153470	973490	1195877	1173541	1154312	1258883
650.40942-2.549	2056809	672357	484773	3059165	2399960	2148488	532354	587346	1139587	2566340	1981082	354389	2183498	1059603	384296	893830	809713	565172	988514	735425	604417	834916	1816233	760048	578305	1903085	351161	820709	714960	900559	1874725	2278339	947805	1917439	560062	645937	1020468	436352	453715	1795929	578901	2762852	1344717	644750	2005773	2299952	1856484	1018168
648.40527-2.92	796775	1056403	854959	932387	658998	785102	1730706	788381	848477	996124	838346	844239	5672416	747233	730201	690803	798142	725641	677725	887062	950869	856791	1020415	738252	845358	756968	684534	913448	678927	641896	796608	868384	885963	787065	754984	716851	832965	738599	938423	754447	746976	882061	1037209	877941	843928	834763	845679	856067
644.36633-1.492	3555823	3841769	2230442	3990354	3757114	5064714	4159520	3690139	3517182	3725249	3867834	3812812	3937858	3408568	6716331	3829851	3765750	2360266	3514907	2117341	4731136	5661054	3920444	3438423	6283894	2380691	4202180	2726432	2376141	6320726	4647532	4272320	2374861	2367309	2329473	5781830	2274066	2474543	5342026	2484769	4375578	4106665	3939442	4007853	3810603	2236548	2220162	2527094
672.48682-2.604	9804602	13000518	16307374	14208538	11205707	9672478	11579999	11453703	12599078	9832852	7855132	13879192	13151336	7433322	5582035	13267754	10227590	7268500	7426646	5754865	8905362	3004951	5072560	11802659	9596210	11782005	4442428	7390149	9728358	10455093	13395483	16944836	14435616	11590030	7895052	14955856	5719475	4654882	11985577	10221281	10887359	9551055	17718632	10880114	8464170	6569960	17765532	6651364
682.47473-7.501	1326216	446859	459295	681658	358657	395653	470210	363661	370721	351219	412819	786240	720411	716128	411768	390452	650982	457219	129544	370135	481313	721788	351845	643496	1399767	1748765	2027704	1385710	923283	404056	2658161	1640932	1696760	1621428	1714538	2068041	1190378	1031830	1714344	1725359	1919716	881344	1176513	1074264	1551987	1184147	1908996	2156895
680.45703-1.496	1196779	792783	1226020	1433671	1358112	1489301	586610	1289547	1288426	1287753	563517	630083	739933	1329603	1426437	542672	1024842	1386787	1400685	834523	714610	781322	1564284	727622	1338995	752656	1569883	1615158	801068	1295345	1463466	1490133	1457712	1744205	1398089	1425246	1443980	1435530	1559925	1493779	1373126	2198637	1465866	2744288	1020861	1460672	2253772	1507554
676.42975-6.146	1673385	2205695	1011062	867651	664830	1401400	2072048	1078800	1588714	614514	997272	964990	1016280	663647	1309052	720426	1567107	771666	598931	1155112	1594840	739811	855919	799874	818057	1820290	2016654	2242818	1523290	777866	2214854	1785012	1751795	1958866	822838	998622	823605	779771	1589275	2184667	1662960	1643790	850654	1598287	887624	1165030	504023	782092
672.40857-1.429	2310925	1738209	2140671	1972958	3700046	2550210	1297007	2561129	2592232	2249182	2140340	1943528	2683128	1538538	1774293	2811232	1813590	2641919	3202250	1955045	1863184	2767022	1393539	2296106	2443960	2168424	1977070	1829274	2750110	2624417	1799300	2747875	2068786	2178215	2607948	1665606	2468314	2662364	2733032	2791103	3978500	2636006	1768130	1681311	1983560	2364844	2017977	1829067
708.49481-8.398	1102728	1319304	999149	1041515	741229	788172	851684	1340552	1101597	846810	1031686	949285	1477092	1266475	1003074	1074817	804159	1002146	997780	1092126	1189186	952696	1038248	1208086	902418	892229	1130586	1372019	1438572	1439127	997618	1460478	1409161	1735600	1065812	1392696	1240200	1083696	1338134	1634355	1077350	775031	1581734	1187849	1168938	1333330	1706000	1487316
706.47211-5.662	983958	1156124	1171538	1215126	963510	927389	810493	711596	1114988	1064834	1126340	1632388	1280486	709263	661756	1144138	845563	604941	585666	581720	1465624	1177196	1330622	686531	422618	964473	744911	942271	933626	1024134	1071431	1176604	937930	646225	689475	1131747	590491	538748	579692	874602	720819	517401	1315056	1185371	1132807	1352757	839534	709379
704.45898-5.589	859108	543720	1029958	578251	333631	441966	1255816	1056736	850151	869170	1280780	1362645	1022233	1001817	799012	1153986	705406	1353234	2068476	849607	576751	1543887	1087505	955638	613712	1086840	592453	666762	440957	818956	944622	2037867	1464330	1767540	2222149	1849797	1778826	749988	1574392	1544899	1566080	1409679	1716086	1791850	867905	2495505	2084176	1690604
700.44324-13.044	332604	370346	411523	427773	336132	310396	548440	311024	299719	293160	436187	494569	532556	330127	564982	394340	449963	368651	313033	347321	281957	534574	525616	383288	413308	455926	412391	524199	335343	421111	479471	319238	326277	449238	481464	440262	455317	428244	355388	417196	421831	439542	547321	496888	435424	508365	402741	543890
698.41821-2.106	1172556	1271268	1501790	1588746	1584993	1235414	1514692	2107516	2179361	2523142	2168863	2343634	2929386	1318106	1951473	1210749	1100567	1399154	1988425	950985	969607	1256029	1109578	956277	761983	728557	908939	709515	1172046	769085	1548906	1384844	1458245	1195781	1307838	1671337	1720586	1921057	1458539	1178440	975421	761040	1566667	2525906	2545860	1443699	1814965	1230051
738.5387-14.02	962938	1343490	929015	2030460	1648159	969973	1070957	1182309	1781544	1023355	1011068	1097039	1037852	914974	2178687	938251	1005605	1095328	1047397	1880271	1292636	1038992	1631538	1091032	2001296	1202883	2073080	2047777	1004037	1073210	1136711	2011102	1846944	1040498	1059741	1478349	1583092	1113409	1738060	1178011	1783074	1015966	2407477	1872831	1177184	1898217	2277939	2152755
734.5094-8.216	780362	739014	879057	794972	758710	660474	762564	806087	659599	665163	621549	1104310	1314858	931040	2516261	1062592	858403	990668	1897096	1069504	1250646	884991	1849885	801990	0	890100	725961	411586	673600	516187	694086	1060001	819570	1662290	1710821	652718	882572	670964	1127446	994715	869732	1037241	838843	1269944	993587	1378544	1177100	1148626
730.4787-3.075	696270	366487	459361	627871	398022	146635	1066396	1719266	802082	423242	740528	1073329	496589	939920	167564	411183	906338	1132341	930858	354790	576994	468173	730388	693265	683364	370113	354166	384854	644095	411259	730138	698858	468448	463470	678564	152892	917965	331447	935546	408549	584168	1123446	830725	481338	987163	412702	156987	457932
728.47021-11.33	1547428	2250458	1364517	661206	1575225	1635784	1661362	1917372	1685711	1203407	1359370	2211607	1850176	809034	1353675	1657813	1292733	1502507	1419291	1813050	1868194	2763314	1578707	2036721	763464	1172704	1293481	1204351	1421119	1571523	1179612	1951729	1462538	1476642	1966128	1461610	1804438	1940764	1354676	1177028	1622401	1563182	1839669	1968646	1378882	1644976	921827	1416938
724.43036-1.373	1928650	2327438	2369155	1997657	2906928	2152160	2106714	2267282	3134922	3016164	1894578	2043732	1956658	2990011	2200184	3060291	1869824	2397762	2548264	2165550	1811747	1658488	2138449	2038944	2118557	2386841	2585212	2822695	2713800	2328127	2615150	3713322	2552246	2586562	2846755	3975899	2729483	2641712	2612244	2869013	2891158	2490872	2110168	2284563	2343738	2330086	1885914	2608899
764.55426-1.805	319283	584044	463049	500795	173385	298153	399492	302652	395988	369166	402348	376476	393876	151878	233003	335082	238149	164932	283504	339320	218549	425043	553444	238635	343498	455242	452311	420020	1816664	392513	190603	459146	320569	501056	176449	136985	294219	227108	214628	173882	253809	408132	247768	460229	382820	271878	261822	387443
762.53973-12.31	3844672	4845418	4293074	7587312	3954760	3810643	3858498	6263374	4787131	3741588	3707729	5170658	5669905	4786174	5231112	4170823	4943806	5393564	3944923	5045784	4887264	4094806	7120714	4667080	5556172	2596238	3387855	3041492	6460618	4413514	4877744	5169874	4196908	2855930	5273421	5434072	4367836	3928371	3966082	3865226	4514522	3327595	6352300	4878898	3491259	5133826	6740412	3592926
752.46155-10.648	559815	542265	650576	659278	620877	448275	572118	608731	439347	664761	563701	473395	638383	512862	478218	525781	718284	476580	508564	498306	362271	549790	609847	534522	801648	1112692	1522635	429546	1249921	570055	546048	541482	991502	820130	666893	534609	1492072	427485	1406574	629772	650657	1450684	1582348	1300564	743003	669546	740620	669224
798.63385-20.628	1377164	1944444	1585707	2269226	1685529	1487384	2314196	2279112	2046237	1736960	1825118	2587502	2515937	1982242	1760380	1623328	1492696	1788930	1929346	1504335	3658326	1928683	2576724	1944534	1267189	1868521	1408642	1722529	1585900	1765126	2257103	2263800	1882763	2150676	2385808	1937712	1873728	1496778	1546853	1870905	1558005	1475133	2093750	1969184	2099461	2491562	3240503	1846029
778.4787-10.916	2742590	4948261	8983530	4387730	3727611	5900988	5926747	2496843	5207072	4989928	3009515	5411756	6003762	6962087	4113150	3959885	3157968	1647882	1976403	1319898	2649570	8986822	1807015	1687606	2186961	1328032	1311500	5471910	1492294	1662427	1549304	1743399	1564804	1026931	3705487	1820993	1822651	1264918	1573612	1418388	1677681	1850324	1980294	1505480	2492138	1774128	2635496	1534336
786.54089-13.101	3692511	3063119	1451797	3966732	3425158	2625508	4738584	4752069	3777060	2401074	1484124	5510390	5216691	4092483	2499101	1525747	1227930	3262194	3573943	1553249	3987933	1469162	4070757	1771823	1421766	2162695	3193386	3010970	3779640	2400780	4403050	3168805	2374615	4254580	3258922	2496801	4715260	4367846	3569668	3790644	4507600	1892850	2901712	2479027	2537411	3206185	9793117	1856500
780.50916-1.497	1305895	913850	911609	801935	1796691	1272188	682063	906003	909702	936361	1125431	907431	949579	1289406	1284706	881266	1998199	1013918	933040	878774	1172340	1071920	947404	1070338	932002	942272	1409804	1015819	1071434	1515986	1288640	1447133	1419022	966212	1496360	1716805	932119	868605	1460782	1526301	1308885	922614	922126	903890	1012496	1018862	1557355	1297667
826.66589-14.464	7163286	7049828	8918897	11806037	8390318	6908417	8151932	8603888	8669307	8462108	8752091	9895769	13117593	9422940	7780416	8549080	8263538	7005182	6892618	5558180	5533372	6358486	7722124	7155354	5534974	5532024	4013603	3965264	6357454	4561204	7316012	11958971	6579654	6627336	9055046	9697852	7766745	4949821	6992271	6837738	5915572	5618180	11796449	8262103	7283067	10046329	15901946	7295596
806.50385-1.422	1165549	3046519	1026975	1648910	808548	1089874	636973	1131541	1385394	1849199	1052495	2321480	2246574	1958966	1152525	1864915	493583	2434281	1283444	3110784	1064902	532898	1810570	1321884	1756780	1392875	2083050	1790523	1235910	1100035	2224480	1195377	1546830	2606430	1584233	729588	2944372	1119713	1140688	1510190	1077201	1843448	1149043	1405126	2339368	1563400	470519	2996014
816.58191-8.222	480260	540839	225482	613005	595401	366826	283847	305369	335417	491026	256876	393735	445107	394731	338022	402677	350615	613251	535552	234344	417511	428987	530253	241636	310965	602990	211550	646417	639054	385112	643859	783493	660035	666956	770423	648579	585877	1603517	635119	666619	525521	476820	620263	701901	570493	806008	711573	631942
808.53577-2.036	865061	1643136	546366	1633631	164468	443170	1574340	1270462	477632	2466773	1348116	475032	1027534	2153005	503825	918664	1210538	1658938	809050	1446158	993229	1505234	1639908	1239730	2347471	1210833	1379398	565783	1136640	461429	876743	766077	1441893	1367811	1138435	449242	1702111	487775	1132680	1088060	756297	997586	505300	1467591	515371	1305516	1113021	559941
854.69458-10.361	239496	847023	341858	703593	214178	189819	326457	487884	193404	142806	628725	255205	212726	189419	134871	590041	456832	486970	169809	403381	179648	299738	899195	486299	542570	832047	710830	727756	181178	913430	920194	468211	920549	915415	228771	221834	276630	422786	389186	388658	411512	343524	476526	1035576	694771	357379	406445	1048137
834.53552-12.055	348510	496620	311290	639790	447614	267452	320246	524223	652475	403016	376196	417482	614636	411647	558363	350856	649715	303698	386799	265090	450882	597479	516066	403766	388631	401068	241926	147893	432019	269083	409108	550301	329735	172364	425088	494113	446255	212729	366911	404135	280998	347982	557638	319974	205949	426014	709689	634384
832.52502-7.504	767105	1289086	1491510	1344802	929909	1051170	1238855	1041023	1111381	746361	1273165	1448421	1202246	908955	1094645	1370177	1289847	1150995	1088859	938085	845150	696603	1043395	939242	882868	784950	661754	768325	661751	730872	1151778	1357066	1158198	877699	1245370	1282231	704184	798689	1122110	866066	956664	871849	1061908	997902	1139615	1066375	1944572	842681
846.62921-16.442	1487780	1477504	1673049	1392007	1618919	1084449	1173150	1908090	1359708	1729021	1740428	1496566	2146408	1959849	1846354	1604091	1155780	954642	1426096	865773	1295656	1934822	1414419	2050118	0	774612	1607677	1020386	969685	1329246	1091944	1577856	2352144	1583174	1847392	1945760	2125319	1464341	1297519	1727216	1312202	1166091	1294296	2561390	2119550	2249012	2331607	2665092
844.61664-7.249	339642	384864	551180	623806	308658	288622	449042	726086	395698	163218	582952	463609	422324	391124	365678	360763	350057	404788	387394	552158	438241	693724	398907	401732	304076	491902	339476	713544	708704	694322	537500	562932	402796	771253	838016	828657	460458	208931	462496	951990	182273	649735	920598	536893	545197	1099399	406358	867568
876.68115-15.954	329020	292464	647746	478229	400855	313221	475647	352663	358193	462238	620222	407906	643532	390355	595861	381956	435187	370292	350738	238074	371913	350283	630160	290775	250308	327189	228789	186796	326907	374405	510286	572520	341258	346138	398404	570796	480454	242633	372344	371895	277467	273698	474939	384236	504882	506177	908967	502540
872.64783-7.261	445353	943411	456022	649136	463944	386466	1163260	1033106	743968	540567	663182	1020372	918056	815929	551809	664680	890522	834403	906012	595314	621949	1034988	653071	789257	588358	1390120	905901	1432482	1023224	1543999	833375	744770	784328	1699495	1325903	744700	1280585	568382	673672	2863600	410561	1016643	964779	1016564	1682781	2716224	1200129	1748173
870.63177-5.586	793856	761089	651364	400253	613522	515164	903111	931663	712378	590132	1357526	881389	742105	810351	744813	1166369	901017	866331	801683	658033	604462	768555	788796	739716	941554	812619	804047	749564	703685	1064080	1018961	1049213	836522	864979	828174	870853	818788	1012668	883060	991477	557676	739229	903883	1130085	738936	1223744	1050479	1642505
868.61713-5.648	618574	552802	918797	825876	689928	686357	633535	1004025	467929	660609	543732	1053437	569680	575161	1048859	939472	1034026	633063	543693	719008	288461	611176	1063518	799673	308104	628205	354932	1088219	290279	1054933	551737	420252	408880	396742	581302	508285	455413	298816	706264	497032	580592	318928	386713	393934	463036	552487	1991033	1855457
886.57861-7.314	282034	365775	585842	691257	262419	185739	695370	773655	686046	176110	98259	766092	476340	734759	340964	340025	258385	630114	576721	429049	361023	693269	323134	551052	481583	694698	445827	546472	603113	312692	895814	392688	407707	792487	441172	769654	369174	267511	356349	844888	247376	554494	822151	806864	816784	709565	327429	857288
906.72803-17.245	566242	404358	925871	1241268	723559	281693	489320	421259	600311	421814	1333852	731882	1312961	573839	1038037	1595058	996353	751583	884263	514607	1063902	678412	1081438	549881	321929	564508	245799	140772	429669	443065	656294	1164666	605358	306174	548157	1889348	717217	146348	789154	616332	622896	348341	1063620	490145	524891	640519	6942071	389565
900.68231-11.752	760226	523768	642416	898438	472978	586501	1107277	1071711	858015	606125	1054496	851557	1469465	874969	934409	653656	233572	987156	1242887	615955	947811	571244	1278319	762125	226145	907986	305164	389491	490330	557079	1033986	1010584	629484	1406400	887648	866766	976706	404243	882581	869951	323652	626605	1870092	1021783	1312680	1785707	2020080	1366836
898.66589-6.7	470237	101610	131432	105305	147904	104844	104895	116741	105160	159447	95796	186661	116252	172238	144824	105595	245649	87968	183054	133711	130854	86236	103383	84212	449758	646138	550057	666327	442863	234170	2532246	2134760	796428	686401	1285047	2905188	907928	447104	1077262	597648	684533	470343	1504472	1466659	1655938	948308	1516535	998914
894.63617-7.382	962931	554707	1291674	416945	952787	572202	306294	1094936	1867483	1135121	528061	912104	1055069	1387496	1260545	857986	992598	556827	1444142	1444159	496881	592054	1098279	814973	0	496239	1461760	1450804	1328519	1194051	1544000	2703420	1773760	1730704	2689904	2243750	1698826	2387435	468019	1490497	2065730	1267040	1530688	1857068	2239258	1453531	2882767	2026174
406.2041-4.726	349483	163114	234744	245726	387834	591281	203564	319960	363923	261072	131989	240035	153215	246783	357111	335129	312950	373007	359186	284735	432931	301983	259670	290404	463912	552792	393055	681152	549362	471184	296356	451374	581351	322890	516288	573845	521710	562935	522487	314397	545919	673704	442854	316435	545102	410749	367959	572402
420.2182-1.669	1975738	1856603	1756022	1692069	1654144	1899834	1867710	1521162	1538606	1507504	1734648	1631412	1476041	1390916	2153926	1734753	1817561	2096762	1544137	1581046	1377155	1405000	1764708	1535617	2349741	2647296	2679309	3130285	2451352	2636286	2721200	2834704	2758163	4648455	2643260	2381650	2351507	2181547	2162637	2403976	2961745	3597020	2026592	3104470	13884868	3660511	1974060	2643784
370.19696-4.227	131422	250534	147204	175517	109267	234859	219501	78441	114531	477258	139459	77353	334357	93978	89946	79888	132834	87802	188433	171509	53637	178646	87831	169442	79192	105578	123779	151714	119463	107519	91392	126584	193568	85759	74029	88954	60831	67946	81843	128057	67399	115833	133990	83892	66385	73466	16725	52692
384.21286-2.114	1788688	3817207	3164954	2225600	2153938	2204834	2445028	2191487	2206711	2585124	1479860	3004030	1576567	2309441	1256616	2023782	1782361	2107013	1379584	1699300	1746522	1860496	2276743	2387838	2047128	2037786	1795572	1833342	2061919	1773780	1700731	1905040	1488418	2690323	2154940	1619354	1308277	2939098	1851833	1606282	1682105	1439858	1647912	2580753	2296930	1803212	1315322	1553984
398.20392-3.629	883459	1347321	1370694	1303202	868810	1184933	1247610	833701	878030	827207	571472	1286032	1016561	453593	1622318	1182345	1266842	1376597	510950	1212797	797378	1147940	949193	1312793	1388430	1488109	1453700	1675912	1454106	1427968	1201776	1021591	603678	1385212	1410651	683889	581741	1055240	1098407	1078682	1096979	1442304	1320221	1373433	567461	1476043	1578301	1530151
426.21933-2.898	365340	294489	133216	413377	95421	111620	494864	132218	228088	213773	302073	133398	119537	258416	359845	108809	315886	122235	124370	436394	919296	469568	588882	472722	316801	1249016	721399	1306350	124854	409811	561508	526415	290711	399312	471408	197119	415141	126948	207528	187972	179181	1619029	143941	742799	442777	798899	115510	394665
424.21649-2.892	683095	270911	336821	310086	264202	347086	329077	376104	509243	511743	433766	659503	612598	600232	687719	434806	616033	626685	623566	392465	296758	669966	490229	560448	505431	326775	808591	917798	526216	505299	450812	296489	690806	316813	597849	426926	752941	466835	277837	272913	594275	609206	275154	306834	311287	660784	372361	309900
440.27353-8.998	430208	334309	290374	296130	423764	327226	416677	407667	312631	332569	336814	283945	275835	286389	423274	298879	314509	444959	447340	292071	345392	301131	448059	311895	306693	437000	480789	527946	474963	426980	416139	286160	467424	615007	418382	524562	374441	618813	406494	556582	500090	455821	389073	396212	453800	370314	390835	504716
438.2486-2.363	3529151	3624769	2852590	2879228	2561061	3175942	4819841	2278764	2578128	2511407	1400739	1192520	1176420	2181834	2586860	2085931	2628034	1265169	1946682	1313216	3771245	2496973	4348790	2532795	2686685	5529586	3316097	1835227	820719	2300770	1353196	3077555	3848095	4072615	1494576	4221847	1336734	1998083	2804613	1339383	2491479	4993211	3682612	2904080	2402771	1323994	1674291	1560445
452.27347-1.667	797537	593793	762585	705346	1261844	786305	693338	37817840	531517	1176944	1039747	1177869	568309	600213	623959	504092	571153	1235924	500057	574614	714325	641416	722456	649592	590316	765840	565486	672497	578542	1175542	601555	749438	689470	2835530	722345	1224300	628992	1116904	637809	628375	1421924	612516	612967	821219	586547	701904	1327514	713977
450.2565-2.893	723096	856318	853483	1004790	1053082	823332	252359	836744	590509	800619	556822	663604	727148	299562	478256	575014	1469880	404038	609203	437324	228519	716547	229959	825042	1045768	1080241	851021	960862	531118	846272	547316	805988	868733	1295373	1147132	200628	747690	173034	482332	680315	1174446	1098212	1210729	825544	460005	497653	593615	629958
448.267-3.183	1565955	1514201	1242697	1392962	1320340	1322357	857681	1337663	1247745	1385374	1292496	1120537	1321018	1221138	1465954	1273545	1349176	1547708	1553832	1313750	1494651	1315761	1420648	1373344	1180892	1790236	1792122	2099429	1478639	1608652	1974748	1980782	1987148	2093366	1648539	2130680	1259930	1983845	1866917	1940708	1820416	1843241	1869233	1872912	1993538	1553478	1894680	1345913
468.30807-6.205	66036	104623	63188	285592	132315	89382	146720	103853	128674	49223	90713	78661	364193	166084	2887463	679410	233131	374720	82261	88004	83512	86550	261329	124248	705053	202184	306850	342822	379635	120866	2381706	146262	166594	266965	556672	878086	160612	227297	84294	104317	56903	367122	255976	294005	566126	358129	496623	1124385
466.29578-2.582	231889	247983	380220	246130	251592	91546	225873	285052	249469	234427	217406	181065	223040	250294	232408	251716	230705	203926	283161	212608	221215	392306	230800	250491	0	293915	177072	307296	232055	329869	241144	288880	259517	228946	251858	439624	263147	208103	89108	230135	221526	222290	292515	455730	250286	366938	292937	446332
464.28262-1.435	1773783	2071653	5245811	2999026	4060006	3127929	1987675	2904417	1700000	5044189	3274727	1462846	1580362	4019281	3777190	4129234	4420168	4952732	1629000	1903814	1607373	1811832	1922035	1782544	5062369	1623020	2133493	3622006	3387231	4820642	3150783	5280294	3651467	2696837	1587337	1635672	1651088	2382312	4769006	4726436	1977931	5592599	1728551	2018972	1372653	1907352	4392766	2079669
487.35175-1.539	513631	543121	521206	509067	549086	1234714	512754	465400	518910	469626	499888	993945	860131	435495	1639448	1211587	1464324	1123288	474528	584131	475566	511849	477814	1214543	0	0	499063	459647	452974	248837	588360	486725	601276	706206	500738	509425	509693	800019	562602	595955	618805	528743	495381	584766	1518966	544422	516729	590492
476.27777-1.683	4708368	715244	2565481	1839254	1178137	4157330	654278	4781153	4556436	649968	1119602	2366136	1632184	1327926	2941239	2772154	3002608	2603244	1215707	1048171	624763	1375416	4268798	2267528	2645512	1790656	2077158	1024309	2310470	4979347	4334202	5368942	2607362	3135566	3127050	3850040	2908846	2877595	4298283	3774439	4162374	2557866	3356805	2784910	1962468	2719586	8155026	4001360
474.27747-5.906	692835	721129	1205418	958200	686568	703583	532590	1091594	991200	481411	486330	872933	991725	652386	839361	517418	532485	932557	850904	422760	941675	517482	844467	497371	773672	800026	1195713	1308094	599972	1005217	1000880	538815	882959	1243584	1112007	667769	1037324	591774	1010142	671108	647151	1083066	800135	1055052	1116136	849790	1100359	1208829
472.26926-5.583	251182	265352	284097	627561	222197	558231	231837	452414	438878	205297	213564	217529	332699	269156	711339	310093	250149	402243	342654	172413	484572	270424	666704	444184	254754	232094	520144	295551	229942	409146	804223	236501	262535	257140	268886	366121	230256	511454	228296	256898	203239	486640	502429	554817	460742	244742	561066	713144
494.32922-1.806	781568	770594	659976	491923	1112738	798312	511387	583085	527388	603463	721863	935559	988857	406042	615092	649486	471822	780678	995596	893349	799612	295673	913083	650927	452850	767988	783674	1535437	910428	339758	1261133	620815	781216	991302	877251	1096931	815609	1034862	704109	799693	542019	1033962	991356	829717	1043555	985271	806601	1310955
492.30667-2.69	1416591	1447153	1549135	1444209	1511962	1512775	1562272	1515556	760088	1411609	1260361	1318005	1644070	409081	1448504	1388886	1638739	1388766	1351915	1266763	1445247	1413744	1542127	1384177	1550124	1508450	1346648	1511523	1406834	743028	448196	1549508	1575788	1395975	457609	1461010	1223460	415204	1547462	1279167	1654565	1553695	1579283	496308	1499649	1321846	599422	1166953
510.34323-5.397	1036190	1172472	1297554	1363854	1012698	1035024	2671763	926598	1713326	805434	2156822	1692078	1811268	914246	2075660	923551	2403078	984476	1715774	2000784	879425	2279919	1158289	936387	2487627	1257416	834014	2546558	4014536	1049282	1885542	1088550	817818	905978	1090025	776335	2180447	1002129	1163446	1032733	733896	2048116	983538	1218891	771711	1047637	873858	2313494
508.33112-8.511	214163	308725	297512	180168	179512	86696	367015	169855	172936	257779	267975	272723	158746	315736	409778	226854	255607	274825	190246	314498	265241	333472	310811	257775	293934	286026	109179	565278	87558	291213	309060	268453	275282	293295	224244	238038	246870	97435	185733	248173	170950	244318	251567	205856	274775	260877	233627	304365
504.30899-7.625	364882	566382	333107	208439	411019	266876	589778	267659	424167	233515	83259	247445	632318	402918	627355	229968	543487	423989	257277	319983	559104	387938	505222	351660	256908	241360	204412	298018	348583	182691	392076	382586	296077	248752	350750	262193	230394	398466	401339	354068	398650	301172	434706	401464	320997	420351	337718	303846
500.27359-2.301	882173	330989	430627	341662	168941	184009	928117	376590	780688	163178	953405	1015284	930980	453940	695299	520532	761960	1106413	882294	784301	161648	721412	1202024	863158	545550	610950	914244	711848	579708	1060327	685342	921916	343003	620916	1815789	2107287	1023765	196658	423116	512950	632688	598174	702289	441775	685392	684991	2042287	1483983
536.37933-14.673	67679	110299	71535	52517	76301	74497	93757	73763	44491	78976	54344	59007	58217	62043	117713	56349	66889	99098	70627	51725	57335	88975	123128	66832	85724	90039	83011	160540	78008	54159	128824	67164	80792	85634	76380	103989	88106	116824	87434	115923	86805	102735	65584	64331	70879	84605	46884	66090
534.36285-7.629	1034062	1215578	1234294	1292943	1063228	1263879	1368414	1103013	1439652	1748417	1199042	1223993	1330220	953962	1346350	1298208	940244	1128718	1232890	1083616	1027863	1390170	1761850	1499497	1195653	1505564	1316263	1445886	1477721	1412227	1345055	1280817	1569224	1173492	1154293	942252	1146000	1447129	1494484	1343222	1547887	1589952	1100230	1546442	1164364	1109105	1316138	1266620
530.3418-1.801	13653075	14317772	22547980	21002748	17085908	17590176	19657758	22432680	15076565	18006804	18295948	25742064	26243092	15790802	14848829	15572087	15410531	9375672	17334892	13667578	18665092	14625908	17164708	18074130	0	8619401	16371475	20106354	22316374	13178557	8668822	16238288	13348001	13239156	14828048	17200002	15389209	16455735	16005807	12406824	13996624	15411552	14016737	12130151	14289109	12537674	12730975	11978770
562.38153-4.219	575240	504357	497456	521964	553557	457674	673817	679230	623819	591790	718505	633416	852853	565933	715982	561399	406393	720106	829263	238564	730063	156259	724585	496000	292720	501004	281801	429178	695394	418150	1421497	721677	506460	1685873	1293045	717593	766711	605187	743229	663009	354308	550018	1294515	835734	988693	1816551	1487513	1160069
556.34778-7.44	897350	1078044	1120007	1538972	1047261	1036860	508004	1172135	878864	901184	929228	445176	1024876	1127082	2457740	1174025	1378058	1494672	972335	907639	824960	978783	1379031	977928	1357010	1212308	1170140	1241588	1050036	1340210	1626679	1030630	1039342	1099767	474942	1273031	1260890	1146628	1156188	1583363	1342469	1152038	1129566	1153730	1044780	1216340	1185930	1212402
580.42963-10.304	252392	423693	203633	77538	65037	94212	598365	219176	262154	69596	286781	523457	151329	91145	103663	204718	112313	129376	217323	253949	337642	697958	187683	504624	50246	300310	190550	242193	82221	197270	95981	185822	104523	150188	350008	248356	100785	88466	132460	77051	152736	232540	211274	246385	284546	264603	278843	87652
594.44666-11.085	1583315	1631505	2517964	2404956	1736998	1741325	3353341	2288646	1744579	1789515	2841674	2308801	2653852	1807584	2880922	2407240	1944068	1901937	2581090	2034778	2540049	2625083	2750190	2221501	1585028	2870217	1834923	2211032	1554095	2040964	2188561	1631580	1901641	2608279	2870966	1715598	2170032	907853	1413378	2003563	1249766	2197822	1753518	1342006	2558878	2608918	3516009	2081529
592.44165-20.557	257906	262389	411917	415098	260532	359131	499101	322750	302042	291405	379786	511113	603612	281360	356243	436091	393427	384480	398801	403036	425301	468326	465061	396929	509280	388103	450694	393947	397053	448625	289047	430599	359293	456494	443170	412442	347783	231051	193948	288981	227934	379543	442836	354940	412185	447935	410850	407745
590.4209-11.879	654105	692001	506058	640359	560280	488258	585138	440652	552310	554050	479473	697582	505449	537720	971880	483130	519109	771340	525467	567578	461151	497684	720086	417231	627459	791143	736520	961382	838909	615372	1085767	705041	764930	846730	858592	910653	836572	651735	670053	880710	621918	845800	798622	556328	823609	796028	651730	683938
588.40631-3.16	2244296	1413925	1482925	1502498	1239523	1240990	1509792	1533796	1190452	1305698	1346378	708487	1168762	1252964	1229223	1139519	1241680	1248813	999356	1194390	1122123	2147017	1650772	1381833	2531591	1279529	1336924	832934	660550	1103238	2536796	2480803	2897173	1248379	1229937	695060	2521488	1969162	2249522	2311210	1361320	2331405	1279536	1392272	1169729	781380	1314700	1379148
586.40442-11.939	26540000	26513496	24848040	28375726	25306244	24244916	26398568	27201884	22497550	23945752	23353784	25422532	22471180	22417096	31956498	23997040	27506616	29383064	23600088	20381912	20311802	22291956	32462070	25032964	33299896	33985736	35373528	39370088	29657298	36097400	38606260	33003818	32634978	34525824	32762786	37610092	32186898	29362784	34042452	37402800	32134462	31020684	30601476	31485436	30909204	34330352	32311122	35674092
584.3728-3.321	2806663	2531562	1386307	2378373	2675392	2177364	1464313	3234040	2797668	1806625	1675019	3632652	2265591	3327744	2114990	2822674	2970172	1742311	2431949	1626037	2109036	926682	1896868	1292408	1561334	1584475	1671786	2541875	2541171	1481133	2416431	3199110	3198040	1931486	3937563	1894059	2002749	1563146	10858410	1656334	5875610	742691	2729598	3025614	2922158	3807876	1718642	2154661
582.37152-7.376	491832	369825	170751	462234	258361	261841	324839	651195	386409	328735	230209	292094	653689	498385	237342	346322	312565	240793	363787	181217	302041	695368	448328	432037	250319	733071	406898	473711	379970	389543	677546	518042	485870	528674	575107	476734	354704	331174	534592	604233	612456	638638	458973	644694	729956	703280	584201	529987
580.362-1.374	4473128	1534863	5016528	2346314	1995109	1283159	5069698	4914858	4297818	4633012	4804009	1607807	2203506	1266045	2132478	4297715	2050623	2260737	4221524	5179638	2316230	4702780	4918956	5437728	2167114	2860910	2414949	1518836	4204738	1981966	3517477	1368038	4579492	1538287	3673447	1519186	2134191	1578590	1879483	1279330	1196168	2294118	1428886	1561347	3264689	2271523	4431026	2318254
622.48108-5.588	554504	428666	664526	245333	288746	178723	747185	940666	689108	337184	459411	582353	598185	464357	726845	427426	716415	933852	822422	415747	415129	734152	913491	734699	429403	778767	1177293	399382	539208	699157	995524	732635	636531	755179	1278881	1108546	889362	466113	627094	899589	1086080	1181248	679775	589019	853595	1154121	1540463	1010379
620.46368-8.863	501766	847015	329121	158026	218973	238516	617270	386920	439161	150211	444911	696550	340858	244574	130438	308500	325003	445002	319000	398577	562938	812347	364760	709518	250125	497518	379479	351067	448338	546193	387999	1078234	606769	594340	832506	861369	255897	323968	630424	172739	807924	501729	719538	487059	386062	411203	953714	712397
618.44324-7.136	13784402	9431254	10181051	10244755	6620220	9182478	17269088	11462843	13004707	7028634	13938702	15142897	22354840	11684904	13661878	9867204	5012622	14550929	13035181	12512183	15890670	11889539	16742412	11414180	8231989	23605826	11349278	13231675	15083246	14684700	20541562	25947310	18751860	23778296	28870632	25766364	21454810	10612213	22300854	19121776	10431668	15671205	24333002	20615378	31720364	30189040	55156836	20319700
616.38794-5.586	1715109	1311046	1005746	1187814	958761	973057	1749550	1978406	1237122	836253	1037962	937764	1407058	922159	1059378	1519241	1423778	1095008	1898767	1078612	2148220	758784	871874	1198152	750953	862952	700187	1291050	1575835	2072541	1349975	2049473	1796220	700693	1925554	2483854	618807	565362	1205757	1822653	1189774	831837	2471890	2615316	791566	1633432	1439464	788418
612.40271-5.528	1529564	1806315	1353017	1804250	1487826	1354960	1836806	2701735	1322330	1447578	1959254	832600	1404427	2076964	1251476	1374840	1652732	1546306	1098670	1250259	922947	1101001	1384927	1217312	1849052	2015292	2201915	2355248	2205182	2356463	2337978	1928343	1534547	3629484	2628600	1738367	2247111	1845032	1852287	4214982	2317315	1606078	2583650	1794688	1549505	2150963	1587558	2991572
610.39014-5.528	1234379	1306339	486170	1102065	256765	449629	1771242	742434	585731	935432	605348	684473	909916	668782	1170309	553391	488312	625027	860035	332985	746337	538322	700638	620962	798236	575789	407970	1088288	533535	1159198	759528	1435632	971405	1338818	1221771	385587	1643471	445283	800361	1870411	873703	788618	839086	749181	889262	1027337	1108905	1688786
608.38605-2.052	930959	2768427	1242370	1534748	916582	1206335	3080447	937248	1010638	1158813	1016580	922069	1440952	912898	1075905	1020796	2798534	1570194	947231	869622	865102	1150326	1206303	1024108	1216703	897354	772804	889817	826024	817667	759465	957577	919644	697863	802453	652855	940302	721433	901596	752085	814532	1000175	1460178	868948	1771804	1397762	1063695	2311658
650.52069-14.803	197256	537854	476720	290019	224580	172357	985394	434083	383122	421628	659194	324190	327646	246871	309078	302313	488709	614025	579287	242088	778620	264244	100827	640127	312420	927284	167621	162716	473473	163301	473155	449327	264589	606521	730039	629287	614268	106813	282741	699446	176976	537746	445008	181973	739118	254707	1033133	292159
648.49536-7.383	545966	509785	394506	463347	628890	373951	433851	688998	324435	416396	428582	519681	493293	770923	480880	406721	427299	470119	392753	359359	465849	695537	428329	397812	377474	738188	374438	410727	637971	795740	885050	436671	681286	818870	421866	523503	404244	576413	763576	800909	566611	591475	858007	463400	865680	1101243	942408	896345
646.47693-8.372	4076894	1184551	1590224	2830330	863788	968899	3154142	1157763	1467356	991132	2974426	2276810	4778214	2822016	1812139	3010884	890738	3169894	1181805	1276263	5574265	4391515	4513570	2662382	2822748	5227718	2104318	2372030	2495881	4846908	4898506	6694670	5019903	5590543	7869857	5014940	4905952	3889832	5258522	4806784	992627	3729370	6751646	5271034	6980810	6536330	10245519	5264017
644.46619-6.575	1015724	890073	254425	816411	693130	397916	952390	1128557	938844	398078	457851	558048	735728	679569	532439	898337	476920	1168936	1181849	1223052	1083471	451186	701286	462546	427490	1312735	911483	616899	1154581	1107408	1605959	1308666	773210	1042965	988886	1457101	948277	446201	1625220	1363571	1250490	801269	948603	1378533	1185534	1106292	2168350	960208
642.4519-12.988	177115	385497	295343	378171	177428	145331	344026	186049	177364	253106	322070	199746	357250	258734	269016	304501	452200	175815	153672	154837	361195	306704	421463	156210	187523	288231	157804	301775	197017	144279	289651	198335	145057	278428	304014	178071	178384	138771	150693	251217	151284	148928	253507	148807	242365	218927	420838	274043
640.4361-8.554	656178	1070723	892275	913509	535040	237401	1514848	1920139	1067470	420976	522007	2187006	989400	892420	700734	710581	701942	1238929	628256	1669509	807157	967548	858722	974357	594884	1585194	869813	499618	835541	1208944	1680323	1656533	762086	560243	849987	2264628	774101	286137	1180980	541295	771256	475238	1644319	1008616	722484	1066635	2364034	1028035
638.41882-5.591	848346	538051	568984	655643	624969	546670	504182	702543	745186	628087	677820	825455	704406	730356	883952	571186	840166	834103	803064	536362	648673	723859	661498	830790	702625	745897	887987	786622	744474	1215091	712984	805415	924700	878562	735587	993963	977106	738518	975210	687247	728480	682021	680191	875637	786833	940925	1016817	996044
634.39117-3.622	1072516	1116480	1907905	2006065	1152283	2092588	1982398	1103713	1164784	1942680	1841356	673057	4005854	1772026	2140163	1857009	2196036	1792880	2634260	568605	1831674	1092633	1811097	1746562	1971420	1862774	717737	1911899	2059020	1925573	766026	1248333	759740	733438	2046727	1397531	2073400	1112413	1894646	1346190	1175053	2367026	2649769	1925993	2082887	1090636	2369287	2375042
678.58624-11.509	1861076	2070793	1571954	1897956	1513290	855289	1135280	2248762	789772	1224054	1163094	1054042	1057353	1258069	1126963	1022761	1113556	1219858	847800	1274852	1020470	1121775	2205889	1254206	845640	1122293	1678215	1348358	845604	1371473	1335244	1188549	1148745	1273311	1988246	1159395	1790460	1003008	923315	1332409	825008	1078102	1639945	1541991	1269157	1163520	1029758	1381464
676.51959-11.937	646337	628006	746788	1030334	657511	592477	1244178	643408	617796	522338	915408	685493	918267	736094	1226080	743328	1068097	817582	716801	468557	698002	991019	1148647	503084	595323	858083	795792	1177627	922382	922514	933182	1090987	1113108	1095654	1144108	750603	1080936	569501	1030644	1120100	511086	1023673	1003222	703303	1245377	1380090	1216962	1220413
674.50531-14.274	361011	423152	429769	519102	529040	523712	589113	555837	487806	385264	431725	536843	542982	568821	352759	694799	434452	344455	545800	365238	296484	264425	449211	531707	0	369730	499821	549989	877356	480404	507338	691768	489050	576908	671453	491607	629804	471097	547142	476126	617428	466340	510680	416130	421091	421070	423392	429095
672.50098-8.494	800771	1005425	1068956	828915	878972	748191	1025635	1090085	860082	804382	1013786	839013	1044837	847623	1183860	988893	1066322	1122502	825607	954016	784683	1000902	1086426	1026076	950995	891564	952792	1394899	802586	1069916	1395399	960954	777627	1208683	781856	992417	1159527	1094622	871811	1318061	980628	1008952	1090957	804852	1118325	982362	810030	1197109
670.48499-8.495	2547241	3531839	3529622	3298379	2880242	2661121	3305833	3915039	2621442	3112932	3869492	3486342	3156498	3254000	4002109	3930151	3462409	3318321	2870498	2806164	2467537	2906352	3590497	3655580	3740616	3625958	4027570	4313664	2915267	3611075	4393056	3344874	2857800	4078664	4025177	3789788	3874936	3217261	3146788	4207728	3963610	3651754	3628286	3157793	3621172	3997383	3586948	4141312
668.45984-8.368	1010769	1116239	1216989	1464202	867481	941184	1163761	1286018	1168491	1039661	1269405	2441320	1674501	1430645	1522454	1242009	1137488	1226521	988733	1028650	1044591	1286726	1450287	1344177	957584	1483733	892005	995859	1091846	1208591	1275458	1486150	1201300	1242468	1268469	1439706	1317721	884049	1084661	1174119	997011	1056387	1679306	1347541	1708930	1894159	2853734	1298039
666.44299-11.694	493114	528719	436551	664070	474632	479723	451376	622780	477911	494642	404361	551099	385690	456315	681135	496843	485611	580642	408544	520677	488838	421106	603629	509925	581425	647468	697817	664926	472180	542916	672720	531846	511817	612706	601278	582373	524410	734886	627633	609973	604159	565225	473267	582988	624896	607806	508998	619624
664.44653-18.968	305555	185478	169450	339513	254097	262898	159105	300746	624267	255158	240478	261418	315198	213972	196638	194756	202737	386734	225222	159159	219838	323283	336823	198012	249745	303774	286709	341777	266020	226850	302569	307470	264592	253913	1066006	288475	669993	337591	373271	386453	1192052	525222	717794	267875	398053	257520	760742	332113
662.41992-6.639	908877	930895	464521	423097	738319	353358	340825	492463	635915	421070	338106	369423	557689	574356	758027	437601	451803	678767	565666	728021	710629	284470	424818	389921	0	733827	905571	954590	588866	569844	697190	1716476	604103	778313	792159	1941762	2216284	1388852	301366	343234	829213	303084	903141	499780	463422	1194180	1026237	1843035
660.39996-5.713	369329	886180	367302	848669	415253	496856	697615	373798	585335	740559	372726	679030	737827	830043	937203	878955	848840	677396	349287	502987	476437	740432	630591	327787	354318	637393	529144	371930	343547	610455	176560	695328	632553	382110	885543	698842	590043	859456	348580	370172	731764	721224	665537	947000	525094	832061	661685	727309
692.60004-12.31	493674	498244	463803	624487	767503	446598	1305082	581833	533859	508494	535977	698823	547234	560026	475084	308782	591899	620130	490619	385874	577729	584300	715570	568995	548376	573372	664605	1882206	469749	386920	565890	384980	700307	587327	410423	567891	828543	586101	448961	495602	632524	507415	230491	485283	389305	476977	660411	377229
706.57507-15.635	1828965	1785566	1463052	1790680	1950944	1415118	1502173	1912698	1691727	1615963	1421555	1454464	1612289	1830528	1762418	1394732	1596250	1899551	1561702	1274353	1658650	1311354	2099992	1353520	1510590	1667292	1564434	1977976	1640655	1682896	2584176	2039586	1952256	1707166	1539960	2135080	1926633	2383434	1995084	2894625	2478297	1973445	2076348	2083445	1687357	1803728	2894526	1750978
704.57788-9.73	269843	599610	483277	632408	412445	302489	460131	525847	189083	230591	171720	779552	398607	449444	254026	684043	497595	204579	77964	168372	1074255	595980	104080	415182	323090	343432	149953	113131	118343	205857	85842	92628	95288	320026	134034	260799	188190	44597	88763	317010	329522	141296	82865	102555	323913	149054	359129	614090
700.53125-9.188	988722	910142	624809	1048853	799373	859173	919324	1008587	996991	1057237	674256	1069559	1010315	1002953	1034598	705333	780816	912020	798424	759649	957881	1031931	1031486	952466	869345	1144083	820403	322487	1065343	916993	934158	1264875	889528	1000740	1352647	1060398	989036	647663	916285	1078195	1085974	976379	926723	895056	732216	1224669	2010392	956279
698.4754-7.568	1193615	418802	767075	780301	383300	713653	822930	854773	744666	362134	765778	885149	906717	416849	920961	775747	833437	919863	788219	729694	741781	1262028	821293	768675	823973	1057389	876760	899821	910805	858537	1478546	1627091	893303	973793	1044502	1105636	997536	410700	497782	1700484	527186	988698	973729	931215	932495	1060791	1603304	1750398
696.49933-11.694	1470850	1421186	1388271	1537494	1222301	1330764	1353020	1478682	1374154	1166754	1287360	1582554	1253240	1478157	1853400	1384640	1388063	1575884	1110602	1847993	1309075	1207459	1611153	1450910	1591162	1800434	1811752	1935708	1388544	1734317	1886340	1696771	1676045	1622858	1726054	1715086	1544254	1696678	1667114	1994256	1664027	1541401	1467790	1779183	1700273	1514042	1539039	1751227
694.47858-11.693	9632588	9581297	9226872	9960878	8417945	9655363	8925242	9394892	8463340	8546924	9083258	8653462	8158054	9163429	12439124	9505557	9244410	10127845	8029331	9102997	8242920	7984252	11030670	8900613	11084050	10998434	12139390	12225052	9454292	11418085	12106975	9670866	10070304	10456529	9703804	11451162	10577113	11698985	10895923	12531183	10792972	10278343	9104480	10872925	9446347	9734315	10330214	11125775
692.47638-13.114	1427601	3308628	1257356	2535060	2826521	1740770	4368820	1460000	1282396	5101295	1379411	1478455	1366414	1658161	1488266	2491853	1666528	1342574	2201221	1356807	1318058	1903002	2147612	3737710	2511032	1523678	3235581	1941865	1131250	2813796	1654541	1377638	4352552	1243327	1539620	3351550	1844169	1209475	1647663	1935823	1583593	1979732	1699504	1582368	1707182	1437449	2114210	1682019
690.47473-3.742	1610155	704769	655698	1523586	1676961	324861	843581	1655668	1422636	404442	280672	452456	1493280	298831	1112914	735646	962230	1184653	271527	208025	147005	181479	158401	907454	0	322079	270817	1451824	953171	1392362	131688	1616746	417728	1985070	579790	192308	292659	1675463	1114195	524573	599246	777166	404692	1344680	612187	199958	1441479	612764
688.42847-10.958	747624	655794	730845	661579	846118	764645	729927	706179	635697	613072	723368	706057	725616	704690	854799	643283	661731	883597	891571	606279	607907	660137	776297	779235	751543	919926	880515	965644	928382	790744	1320125	661462	866228	896220	691351	1168279	1002846	1016379	807796	1285715	1132458	985773	1008743	1086836	827725	855144	1225597	866684
720.58899-16.319	1330515	1389920	1277253	2001440	1997380	1179696	1603865	2075293	1555837	1446655	1738363	2841312	1979816	2777307	2045417	2294602	2299473	2025072	1609014	1497464	1871312	1631270	3005084	1751711	0	1342882	1185102	1151645	1714311	1077077	1446715	1421515	1455205	1391594	962194	1293787	1513438	1291821	1067620	1554882	2026662	1226926	1001562	1979974	1472390	1757872	1374731	2864565
734.59875-7.561	569847	362677	179342	555556	162832	69223	354172	530400	261890	145923	213853	1337070	1135562	856581	187176	209663	179063	275261	302561	189636	283685	1036665	199863	487042	147251	348136	285897	284536	971534	385994	370704	424677	751585	335649	402532	646105	632369	237681	999564	774567	502394	303137	385522	870921	795292	836446	861637	634100
732.58203-10.526	1841049	2356435	2443859	3163260	2176477	1764730	2020926	2475416	1507618	1658254	1447086	3110823	2468484	3252117	1797655	2471268	2400074	1476588	1112365	958800	2362470	2237292	1577760	2214960	1723417	1449157	709303	894232	1312498	1243416	963542	2079584	1437231	1507330	2198448	2047740	1329346	992556	1489791	1706755	1085860	1492098	2207946	1907761	1858417	1785473	2547509	1919064
714.46631-6.392	109105	425785	354440	363782	502316	519194	378708	334929	327001	532684	533865	1010951	675569	641746	657853	514835	346835	588060	316679	281360	315276	328693	350141	543550	288267	617151	191562	419876	355027	309242	633093	500878	652830	657433	661590	573163	559742	519132	957343	655678	915497	371448	668858	406208	439158	750724	539121	388646
730.57135-12.066	1349466	1063176	1475095	2324698	1263993	1225430	1362642	1174756	1033755	1104498	1094281	1665191	1568314	1950475	1484994	1412473	2021852	1296659	1005903	1523050	1278523	1221656	1338942	1505611	1517045	1139777	639332	277606	1453114	1240244	1498502	1761895	1422802	737506	1832027	2424141	1877058	594480	1690390	1235588	1171247	1914410	1983490	1731761	1267025	1925486	2902849	732687
726.57867-11.572	622755	788897	611568	668404	693342	577676	638203	630458	596837	519409	440268	631388	699416	731492	458486	596365	605404	551101	431962	486236	755570	647262	626324	551764	579880	482120	446347	461515	571618	567525	614568	744838	527853	550839	707386	693780	563581	408200	539283	532719	588509	531362	752715	631228	692546	706651	1020906	599447
722.50476-13.969	26701636	29198886	24335396	35146216	25232720	28845634	31322314	32893564	27647726	28424500	31268544	31979362	28311420	26830450	34094352	29503272	29564632	32979322	30052970	30937558	28210462	31914372	35738900	31757584	31787966	31835250	33131378	34153852	29266378	33322058	35095096	28988544	30580656	31152202	31180864	30983282	31720548	28865456	29127774	36291748	29859818	31687752	30263656	29540854	30325120	33035204	29650722	33186810
720.4455-6.52	281311	351901	313346	440730	278467	253567	359358	330908	327979	281217	315904	392284	1024716	340631	412154	815622	362272	481616	301370	219413	346509	269749	343370	279283	267580	311574	260199	268974	282066	270484	380367	393296	316827	356018	389588	441275	357319	209836	340170	324050	248492	180935	464610	379923	349579	547486	1169847	445620
718.47339-11.88	19062426	25130160	20939406	24150372	20504638	21332290	16203962	22929830	18671416	17288434	17088332	24660156	21284750	22020588	16388595	19501136	21254018	20184814	16574629	22378066	21367324	26256870	20938610	25552476	22461444	15748146	18104674	12680559	16298415	21414858	16673014	23677858	17790456	14610212	22218798	22222278	17646260	20928060	18529782	15986226	22731762	16558731	23810356	23611764	16127708	20265346	28143564	17882562
716.46387-8.111	1265062	1961843	1467312	1508646	1485981	1161446	529622	1282634	1563943	685738	1171855	1459965	2206915	1753656	871670	1463166	1288255	1620628	1149079	1158410	1396485	1403161	1167447	1668561	1336789	927640	649734	672749	764554	822862	880274	1076890	1117129	1168428	496708	1317055	435287	1068538	888798	870567	1269755	1168139	1628342	1289744	1597921	1731541	914616	526804
752.5387-6.893	542665	2137441	390204	2543676	1092275	576434	1642641	1901204	2741728	1199354	845087	2413104	4657268	1720795	363638	843442	352205	337016	1988224	255751	3753998	343299	295439	1218640	109846	153760	111146	118325	437827	534871	324352	355498	268608	248789	338383	343327	271736	147790	301346	388401	179696	224870	555270	337081	312241	471274	473367	305141
750.55029-20.14	2063162	1903950	1111049	5061513	3814454	4154870	1224541	2087148	1764331	1507414	1063467	2303658	1344568	1738696	1156301	1685159	1235191	1865318	1065763	1906795	1642234	2872030	2410222	1156964	2085227	1745035	3072440	2429963	2980094	1099895	3903950	3372317	3247331	2104588	4445742	2988497	3145810	2397262	2848538	4011077	2554398	2854836	3362066	3029417	2722596	3587460	2992451	2033113
744.55786-7.322	384013	835776	960088	989150	312035	622504	1487949	844006	454660	598913	972740	1131618	677858	595970	658338	894420	825532	812648	670417	660798	783625	1015214	1085412	999338	450846	940646	903396	794537	615675	1465230	1289789	493297	742571	772596	842059	892435	776129	708326	431108	1590651	296166	824010	879460	712762	838162	901969	685764	1889795
790.66046-16.344	200860	240253	532822	727591	555251	345828	652851	895700	221641	178092	171064	288328	328054	369494	708617	101691	513971	88371	84679	137064	371008	1603018	343321	317913	0	42765	344578	50615	50459	67024	65336	236620	77119	219158	61785	61020	121501	73174	28143	67747	61544	28061	30766	259412	60318	265539	91312	509301
788.6604-12.433	3259834	3753134	3623818	3991620	3503466	3571080	4215854	4039118	3770082	3848832	4363244	4485163	5085588	4689215	4003404	3477482	3211616	3856196	3000854	3782769	4799862	3356290	4499802	3953681	2531636	3184270	2538947	2522580	2912940	3232406	3426996	4339516	3240612	3430918	4081736	3759262	2812873	2302073	3239174	3218102	2542025	2998092	4164347	3690358	3699384	3903679	5221978	2909723
770.51202-5.656	1403159	847229	841619	540677	751381	371683	1924551	1420135	1357121	619134	412926	827214	864258	924776	1458782	857715	1771524	1545939	1329603	405868	472230	677481	662749	1317294	608891	662858	999599	1088913	463137	1558028	1657363	1801482	1813737	1492235	874319	1891515	411833	523023	1239537	1368383	1220553	1308507	2038497	1537902	788745	2249966	1114070	767677
768.48279-6.64	756806	695613	429596	1047077	613096	543508	923129	872391	1097519	1051628	772026	1128160	1286348	1019994	530579	495641	1005715	788138	680005	320324	731246	443123	403911	778933	363107	725447	537980	547829	845516	735543	1086396	1128836	858227	777700	1111393	1167954	1209846	462277	986981	1208648	750135	707919	1392030	1043178	949335	1491560	2717855	939419
786.62195-18.497	561768	519070	347328	195773	320288	275794	206964	409975	312055	341418	297701	364539	486788	410322	389371	396123	202534	215382	362460	320116	307790	486212	461256	358000	0	693725	1444432	906713	1152551	1448761	321808	1618950	1708166	1360393	1871208	1955510	1502919	1840805	762956	1324638	1885342	969109	1330336	1800412	1378644	1758891	1907254	2742990
784.62061-17.434	276806	459641	165015	791514	422148	375744	255076	178324	214947	1173762	251042	529610	230719	259689	447499	93888	399616	189568	163527	201841	904063	202931	442610	164145	107771	265413	126398	183332	151018	202758	188057	288102	131520	62029	371508	276089	104950	64820	170568	57134	131113	111420	267989	231923	253016	186940	474421	96953
780.58893-13.964	17837672	12142101	15291093	17824522	11572417	19180230	18114682	20456472	11649900	11678049	15138866	20772902	14461844	14276762	17648692	16091968	16116049	19885442	18073302	16555521	11136340	19183036	22563934	18165308	16474206	19226236	18901724	18400146	19288802	12421179	14711457	15900495	19284340	17507522	20036376	15794147	20270058	16802034	12097499	23539462	18945052	20051554	13448476	19359076	19341882	21666106	14946365	20528868
776.56097-11.455	11624651	7387810	13517375	15430364	13332843	11452965	11891834	13138346	12836864	14015483	13860194	12445367	15735388	10794480	18800264	14033804	15527031	13417290	14713889	8830877	8867496	9886533	13486898	9204392	13253413	11008174	9310156	8323894	13141415	9263481	12244877	12738242	12603137	10547479	11794192	13563336	13678527	4397665	11700406	13812818	6990944	10059621	12570384	9231571	12656695	12550181	15056915	11868915
774.53589-5.717	872328	823854	631463	768922	658112	296271	955677	394752	666079	556866	621517	753498	854586	1224591	854018	757310	768374	1022210	675982	764206	645864	611172	976766	745690	296694	675595	487365	513126	840870	685029	373403	961173	655315	852411	981634	802482	634708	708403	627897	369583	669509	513234	1387732	447569	417616	896666	1101200	899260
804.67871-13.287	532865	778413	710897	855345	565329	561467	879810	702982	676132	443379	624916	901791	956640	607834	513617	661396	627880	626138	559080	554906	703757	627958	721621	669464	357016	603264	407277	368247	556412	419400	671909	903438	624880	504024	899142	706614	658947	418846	551867	549636	389877	534993	877579	642009	527822	909270	1272662	646033
798.55005-7.133	2047326	3472386	3631718	6465570	2877546	2510597	2564995	2705092	2502436	1816326	2647415	2897718	2708192	6902170	3133442	3400016	2849442	5736045	2442406	3152904	2347816	2258778	2492969	2699432	2595450	2084947	1928946	1600443	2253532	2612312	4826830	3576969	2320206	2015637	2565666	6985717	2284970	1711603	2412894	2482707	2609428	1783324	3408994	2593532	2019392	2805163	16512879	2083155
794.52435-5.588	1150896	1391261	2552612	2423620	1548771	1140131	1502704	1231073	1063519	1155728	1201032	1272314	1495282	2573829	2188422	1846437	2133350	1270689	1288965	1200920	1422343	1167119	1062414	1194790	1449815	971373	708276	659089	1145451	1156420	1671025	1488840	1153161	829716	1335767	1855483	1487092	799816	1275997	1391235	919075	935002	1608643	1388901	1188360	1546606	3055254	1126537
814.66821-10.41	2283365	1805614	2343403	3142261	2017777	2329650	3484662	2726127	3007601	2460508	2374914	3728644	4412418	3024985	2474128	2416142	1434126	2770780	2580534	1548947	3186388	1304832	3351190	1526375	1350576	2549083	1378260	1401783	2356783	1127516	2408461	2610942	2098950	2584568	3608600	2719651	3107025	622657	2320159	1794878	1454093	2214651	3355526	2288140	2744474	3863688	4794221	2457564
812.65704-14.097	8238529	7354150	10784172	12255336	9462223	6992434	4790830	2549266	7363432	6414178	6120064	6876958	12355890	7808395	5739509	8193349	13932266	5012400	5366630	4382628	5685026	8827429	9174495	6993702	13450565	3086783	2494372	862259	9329259	11175078	2941364	14430380	7696198	1806434	9340441	12019975	9166063	3353774	7457799	2000724	9578167	5170065	14304308	9705620	4230896	7228500	18202036	6505566
806.61505-18.416	832283	847583	728222	252478	11953132	439975	6274058	374921	5904136	405260	403879	262617	571998	318956	654338	319551	268733	315658	469602	340889	480054	5416866	307288	300274	0	452634	255495	144488	4813444	905466	315860	321594	456567	534764	239696	316580	426552	222814	495469	350344	245340	390419	203198	299670	453162	317764	8054529	616390
822.55121-7.565	290629	125782	592253	409967	315430	151549	470933	413059	344108	88839	313851	492428	547704	375414	377444	480534	774107	378897	405229	104264	405347	366279	378425	335522	1308440	434557	254173	112568	356651	341887	423786	428761	361593	430862	845824	481969	473563	72072	1225181	712239	255322	329061	446056	131516	182573	506662	2477224	692452
842.68939-18.044	18957098	19257160	28860390	19954002	23259384	18511404	22815188	22751170	23131772	15623571	12289672	18122598	33304744	19485326	23005666	10948447	16580615	10614891	18111790	11806255	23105476	29000900	17818902	19256074	0	6196489	18819256	21103278	22034966	12072299	9132270	21452080	26600124	19809408	26763972	35330016	16070848	15037462	24161292	15641059	16587029	19443614	21114996	26705992	25238458	25728496	25056984	29878430
834.64496-10.284	1936255	406806	717336	1286091	1211784	530070	686592	545910	610648	780642	982682	1014999	1617126	420260	994049	1114268	993527	1606886	2024502	490616	502162	830273	1624717	720654	3937775	2104381	1812160	641701	6776750	2250820	2817701	2483856	3888491	865149	2576628	3553584	6542430	812952	2268041	3574672	2794397	2628958	2760741	1323561	1333548	2209211	3346503	1702853
830.61475-13.667	1141423	759478	648306	943942	949625	667756	1491090	1336416	1255266	889478	807493	2118272	1856162	1032762	444117	772022	451715	771378	1218300	845403	4483923	973055	1156482	949591	496465	1373115	562800	459912	911018	447976	778730	2036692	1398435	1134881	2369672	1065642	1253793	1224087	1012764	712663	1165705	1155131	1557928	1538716	1997593	1784371	2187647	883458
264.20715-2.044	445120	613909	516839	529940	788764	555837	729854	598461	611812	549740	719151	1157293	692364	492635	413164	491740	383386	593908	613106	371469	368469	394730	440456	481694	440919	568677	888402	947480	677633	686866	822660	546416	676081	658437	873801	932485	607965	743906	462382	775522	600519	513520	571562	533498	385518	497368	380475	455132
278.24725-2.803	260078	548380	210049	307028	232259	339260	219537	265223	408085	652963	226317	217119	898222	151144	563915	450180	264559	260063	328238	210524	408878	493564	515658	227036	436225	258322	300632	293790	293382	284985	612074	551845	279059	289252	294208	368981	298624	209359	308541	536822	493685	390142	1121515	248473	360302	289470	655160	300730
292.25784-2.284	84744	55800	302332	38580	46808	54354	429550	12159	67941	44366	99210	93750	164346	39754	125868	33143	28670	63136	26808	57361	506562	22833	442456	55110	10846	244519	95628	172577	73492	75834	41777	278909	71846	394978	319938	84106	59614	40137	40407	40963	88747	115013	86688	102704	217540	130738	42189	42295
304.25955-4.843	2383878	2160943	1669329	2269199	1085600	1453615	1878841	2092280	999702	1399874	1172657	1076898	939752	891808	1140378	933025	1428635	1860250	1682269	2697212	1944054	1240420	5378471	1178355	0	0	3111830	3212377	3777011	4213688	2824885	2051567	2908709	2596080	2522132	3629002	2612096	2699985	3568520	2409568	2455831	3165420	2851443	3164667	2196696	2632322	2317404	2447999
320.24188-5.589	648181	632438	673130	1239752	1171748	516120	847918	989923	763434	673244	903568	1090813	1040249	736853	797968	670221	704751	443374	586923	513076	853778	780248	873392	1333340	0	390202	429704	478937	485953	408979	634180	541458	516727	407164	637057	383118	418641	478758	696083	469113	538222	376413	353624	488805	529906	491802	571389	556664
334.30511-5.716	402366	379731	348635	456249	387926	452432	447338	1266591	425248	756886	465946	375943	371574	456955	417029	516050	423827	862622	421028	493466	413624	692640	968337	1000403	600763	416887	422730	500308	631504	415234	422357	1134716	532592	638718	444629	458194	506243	868773	513729	407464	1027158	486602	420353	464614	801455	883781	571410	462261
332.2926-6.454	23539	0	52354	627585	590547	605898	616834	543839	583822	655343	733764	539556	690340	584963	551117	571765	465899	513369	441902	590859	653471	620282	731917	715372	670406	714866	695553	0	0	845108	729571	903560	986563	890942	750318	723836	861922	648247	777856	629222	838664	815398	850562	712299	777500	855612	763569	673387
[truncated: 2,781 more rows]

## Sheet: Table S4
Supplementary Table S4. Identified, annotated and unknown lipid species detected using LC-ESI-QqTOF-MS analyses in positive ionization mode in roots of two barley genotypes (cv. Vlamingh and cv. Gairdner) under four treatments. GC- control roots in cv. Gairdner, GCF- inoculated roots of cv. Gairdner undert control conditions, GS- salt treated roots of cv. Gairdner, GSF- inoculated roots of cv. Ga…
[truncated: 3,637 more rows]
[truncated: 2 more columns]

[truncated: 1 more sheets: Table S5]
